# Supplementary material for: Thermophilic Dehalococcoidia with unusual traits shed light on an unexpected past
Source: Research Square preprint supplement (doi:10.21203/rs.3.rs-2143584/v1), 2022-10-18
Supplement: Supplementary file 1 [file 2e94a5bf2edd866b9e1359bd.xlsx]

## Sheet: Table S1.
Supplementary Table S1. Genome information for GTDB representative genomes of the Chloroflexota
Accession	NCBI BioProject	NCBI BioSample	CheckM Completeness	CheckM Contamination	Check Strain Heterogeneity	Coding Density	Contig Count	GC%	Genome Size	GTDB Representative	GTDB Phylum	GTDB Class	GTDB Order	GTDB Family	GTDB Genus	GTDB Species
GCA_011370265.1	PRJNA480137	SAMN09639482	98.18	1.82	0	88.3662	175	54.933	8472475	GB_GCA_011370265.1	p__Chloroflexota	c__Anaerolineae	o__4572-78	f__J111	g__DSQQ01	s__DSQQ01 sp011370265
GCA_012032575.1	PRJNA612530	SAMN14376538	90.91	2.1	0	87.2004	876	54.4051	7919359	GB_GCA_012032575.1	p__Chloroflexota	c__Anaerolineae	o__4572-78	f__J111	g__DSQQ01	s__DSQQ01 sp012032575
GCA_003130875.1	PRJNA392119	SAMN08972831	90.91	0.64	0	90.6706	195	58.7199	3489151	GB_GCA_003130875.1	p__Chloroflexota	c__Anaerolineae	o__4572-78	f__NAK82	g__NAK82	s__NAK82 sp003130875
GCA_011362805.1	PRJNA480137	SAMN09639983	90	0.45	0	91.118	270	58.0086	3143961	GB_GCA_011362805.1	p__Chloroflexota	c__Anaerolineae	o__4572-78	f__NAK82	g__NAK82	s__NAK82 sp011362805
GCA_002436085.1	PRJNA348753	SAMN06455617	92.27	2.91	0	86.2958	56	54.8896	2156678	GB_GCA_002436085.1	p__Chloroflexota	c__Anaerolineae	o__Anaerolineales	f__Anaerolineaceae	g__49-20	s__49-20 sp002436085
GCA_012517865.1	PRJNA602310	SAMN13894273	90.91	2	0	90.7658	51	55.7461	1915848	GB_GCA_012517865.1	p__Chloroflexota	c__Anaerolineae	o__Anaerolineales	f__Anaerolineaceae	g__49-20	s__49-20 sp012517865
GCF_000199675.1	PRJNA224116	SAMD00061114	93.64	4.73	0	92.3622	1	53.8497	3532378	RS_GCF_000199675.1	p__Chloroflexota	c__Anaerolineae	o__Anaerolineales	f__Anaerolineaceae	g__Anaerolinea	s__Anaerolinea thermophila
GCF_900184705.1	PRJNA224116	SAMEA104092011	91.82	2.91	0	88.9223	1	49.1358	2574431	RS_GCF_900184705.1	p__Chloroflexota	c__Anaerolineae	o__Anaerolineales	f__Anaerolineaceae	g__Brevefilum	s__Brevefilum fermentans
GCA_012522475.1	PRJNA602310	SAMN13894000	91.82	3.01	20	88.7305	89	48.8481	2255161	GB_GCA_012522475.1	p__Chloroflexota	c__Anaerolineae	o__Anaerolineales	f__Anaerolineaceae	g__Brevefilum	s__Brevefilum sp012522475
GCF_001192795.1	PRJNA224116	SAMD00034989	91.82	3.64	0	85.4686	11	41.3957	3510630	RS_GCF_001192795.1	p__Chloroflexota	c__Anaerolineae	o__Anaerolineales	f__Anaerolineaceae	g__Flexilinea	s__Flexilinea flocculi
GCF_001717545.1	PRJNA224116	SAMN05505093	91.82	3.64	0	90.7371	1	54.8602	2945494	RS_GCF_001717545.1	p__Chloroflexota	c__Anaerolineae	o__Anaerolineales	f__Anaerolineaceae	g__Flexilinea	s__Flexilinea sp001717545
GCA_902791025.1	PRJEB31266	SAMEA6151768	92.73	4.12	0	89.0795	79	47.3873	4221480	GB_GCA_902791025.1	p__Chloroflexota	c__Anaerolineae	o__Anaerolineales	f__Anaerolineaceae	g__Flexilinea	s__Flexilinea sp902791025
GCA_903828565.1	PRJEB38681	SAMEA6955544	90	3.64	0	93.7213	48	52.1211	2224945	GB_GCA_903828565.1	p__Chloroflexota	c__Anaerolineae	o__Anaerolineales	f__Anaerolineaceae	g__PNON01	s__PNON01 sp903828565
GCA_002306055.1	PRJNA348753	SAMN06456415	92.73	2	0	87.7894	69	50.7542	2157371	GB_GCA_002306055.1	p__Chloroflexota	c__Anaerolineae	o__Anaerolineales	f__Anaerolineaceae	g__T78	s__T78 sp002306055
GCA_002399085.1	PRJNA348753	SAMN06456288	91.82	2	0	88.812	95	50.1323	2369052	GB_GCA_002399085.1	p__Chloroflexota	c__Anaerolineae	o__Anaerolineales	f__Anaerolineaceae	g__T78	s__T78 sp002399085
GCA_002398025.1	PRJNA348753	SAMN06454679	93.64	0.91	0	87.9154	176	46.9151	1979571	GB_GCA_002409625.1	p__Chloroflexota	c__Anaerolineae	o__Anaerolineales	f__Anaerolineaceae	g__T78	s__T78 sp002409625
GCA_002483705.1	PRJNA348753	SAMN06453273	90.91	2	0	86.1567	291	49.7888	2184832	GB_GCA_002411175.1	p__Chloroflexota	c__Anaerolineae	o__Anaerolineales	f__Anaerolineaceae	g__T78	s__T78 sp002411175
GCA_012729755.1	PRJNA602310	SAMN13893685	98.28	3.61	7.69	90.4549	125	50.3356	2225670	GB_GCA_012729755.1	p__Chloroflexota	c__Anaerolineae	o__Anaerolineales	f__Anaerolineaceae	g__T78	s__T78 sp012729755
GCA_012839565.1	PRJNA602310	SAMN13893608	98.18	1.82	0	90.6813	20	46.8262	1969548	GB_GCA_012839565.1	p__Chloroflexota	c__Anaerolineae	o__Anaerolineales	f__Anaerolineaceae	g__T78	s__T78 sp012839565
GCA_011322445.1	PRJNA480137	SAMN09638701	93.64	4.55	0	91.0623	53	62.0605	2633727	GB_GCA_011322445.1	p__Chloroflexota	c__Anaerolineae	o__Anaerolineales	f__DRMV01	g__DRMV01	s__DRMV01 sp011322445
GCA_011176535.1	PRJNA605778	SAMN14094334	91.82	2.73	0	90.6006	129	64.2126	2271931	GB_GCA_011176535.1	p__Chloroflexota	c__Anaerolineae	o__Anaerolineales	f__DRMV01	g__DUEP01	s__DUEP01 sp011176535
GCA_903883525.1	PRJEB38681	SAMEA6948189	97.27	3.64	0	90.7765	239	55.0226	5724162	GB_GCA_903822545.1	p__Chloroflexota	c__Anaerolineae	o__Anaerolineales	f__EnvOPS12	g__CAIJPN01	s__CAIJPN01 sp903822545
GCA_011367945.1	PRJNA480137	SAMN09639653	98.18	1.82	0	92.0093	24	54.6603	3168005	GB_GCA_011367945.1	p__Chloroflexota	c__Anaerolineae	o__Anaerolineales	f__EnvOPS12	g__DSXF01	s__DSXF01 sp011367945
GCA_011370595.1	PRJNA480137	SAMN09639965	95.45	2.73	100	90.451	228	59.4482	2174061	GB_GCA_011370595.1	p__Chloroflexota	c__Anaerolineae	o__Anaerolineales	f__EnvOPS12	g__DTJF01	s__DTJF01 sp011370595
GCA_013152325.1	PRJNA557557	SAMN12405794	93.45	2.73	33.33	90.2816	176	59.333	2946974	GB_GCA_013152325.1	p__Chloroflexota	c__Anaerolineae	o__Anaerolineales	f__EnvOPS12	g__NIOZ-UU36	s__NIOZ-UU36 sp013152325
GCA_014382535.1	PRJNA649215	SAMN15784279	93.03	1.82	0	88.6301	261	47.9126	3649820	GB_GCA_014382535.1	p__Chloroflexota	c__Anaerolineae	o__Anaerolineales	f__EnvOPS12	g__NIOZ-UU36	s__NIOZ-UU36 sp014382535
GCA_001567105.1	PRJNA274364	SAMN03372534	90.73	1.82	0	89.3877	74	40.1577	3041536	GB_GCA_001567105.1	p__Chloroflexota	c__Anaerolineae	o__Anaerolineales	f__EnvOPS12	g__OLB14	s__OLB14 sp001567105
GCA_002344295.1	PRJNA348753	SAMN06450903	93.64	1.82	50	92.687	47	53.277	4566980	GB_GCA_002343775.1	p__Chloroflexota	c__Anaerolineae	o__Anaerolineales	f__EnvOPS12	g__OLB14	s__OLB14 sp002343775
GCA_002344225.1	PRJNA348753	SAMN06450899	93.81	0	0	92.2986	326	40.8102	3221400	GB_GCA_002345215.1	p__Chloroflexota	c__Anaerolineae	o__Anaerolineales	f__EnvOPS12	g__OLB14	s__OLB14 sp002345215
GCA_009885945.1	PRJNA525692	SAMN12036117	96.72	1.09	0	91.433	209	44.7426	3433618	GB_GCA_009885945.1	p__Chloroflexota	c__Anaerolineae	o__Anaerolineales	f__EnvOPS12	g__OLB14	s__OLB14 sp009885945
GCA_011046595.1	PRJNA480137	SAMN09639453	99.09	0.91	0	92.4353	34	46.1237	3267454	GB_GCA_011046595.1	p__Chloroflexota	c__Anaerolineae	o__Anaerolineales	f__EnvOPS12	g__OLB14	s__OLB14 sp011046595
GCA_013140605.1	PRJNA622654	SAMN14539134	90.91	0.91	0	90.4373	132	48.9842	3932002	GB_GCA_013140605.1	p__Chloroflexota	c__Anaerolineae	o__Anaerolineales	f__EnvOPS12	g__OLB14	s__OLB14 sp013140605
GCA_013388795.1	PRJNA564648	SAMN14673735	92.58	3.82	28.57	91.4737	357	53.0458	3216887	GB_GCA_013388795.1	p__Chloroflexota	c__Anaerolineae	o__Anaerolineales	f__EnvOPS12	g__OLB14	s__OLB14 sp013388795
GCA_014379595.1	PRJNA552582	SAMN14819074	95.45	0.1	0	91.8509	72	44.6776	4473196	GB_GCA_014379595.1	p__Chloroflexota	c__Anaerolineae	o__Anaerolineales	f__EnvOPS12	g__OLB14	s__OLB14 sp014379595
GCA_003577345.1	PRJNA450161	SAMN08931189	90.39	1.82	0	90.2834	358	56.7722	3726020	GB_GCA_900696595.1	p__Chloroflexota	c__Anaerolineae	o__Anaerolineales	f__EnvOPS12	g__OLB14	s__OLB14 sp900696595
GCA_903840345.1	PRJEB38681	SAMEA6956838	94.55	3.45	12.5	89.7808	503	47.8441	5009654	GB_GCA_903914955.1	p__Chloroflexota	c__Anaerolineae	o__Anaerolineales	f__EnvOPS12	g__OLB14	s__OLB14 sp903914955
GCA_001796365.1	PRJNA288027	SAMN04313847	99.09	0.91	0	88.82	37	48.2392	3406294	GB_GCA_001796335.1	p__Chloroflexota	c__Anaerolineae	o__Anaerolineales	f__EnvOPS12	g__UBA12087	s__UBA12087 sp001796335
GCA_014584545.1	PRJNA335309	SAMN15870301	90.91	0.91	0	92.5318	36	52.8182	2616745	GB_GCA_002050275.1	p__Chloroflexota	c__Anaerolineae	o__Anaerolineales	f__EnvOPS12	g__UBA12294	s__UBA12294 sp002050275
GCA_011331405.1	PRJNA480137	SAMN09639515	99.09	2	0	92.1538	30	54.3918	4165555	GB_GCA_011331405.1	p__Chloroflexota	c__Anaerolineae	o__Anaerolineales	f__EnvOPS12	g__UBA12294	s__UBA12294 sp011331405
GCA_013360875.1	PRJNA601861	SAMN14239021	91.82	1.09	0	90.4734	208	56.8439	3987936	GB_GCA_013360875.1	p__Chloroflexota	c__Anaerolineae	o__Anaerolineales	f__EnvOPS12	g__UBA12294	s__UBA12294 sp013360875
GCA_013388685.1	PRJNA564648	SAMN14673739	92.73	2.91	0	90.9146	63	56.7984	3526988	GB_GCA_013388685.1	p__Chloroflexota	c__Anaerolineae	o__Anaerolineales	f__EnvOPS12	g__UBA12294	s__UBA12294 sp013388685
GCA_003130845.1	PRJNA392119	SAMN08972833	95.45	4.85	16.67	92.4834	159	53.8874	3767540	GB_GCA_003130845.1	p__Chloroflexota	c__Anaerolineae	o__Anaerolineales	f__EnvOPS12	g__UBA5195	s__UBA5195 sp003130845
GCA_903870525.1	PRJEB38681	SAMEA6943713	92.73	2.91	0	89.7935	303	53.9668	5074158	GB_GCA_903838415.1	p__Chloroflexota	c__Anaerolineae	o__Anaerolineales	f__EnvOPS12	g__UBA5195	s__UBA5195 sp903838415
GCA_903846015.1	PRJEB38681	SAMEA6947941	97.27	4.73	0	89.0398	662	50.7404	6508203	GB_GCA_903846015.1	p__Chloroflexota	c__Anaerolineae	o__Anaerolineales	f__EnvOPS12	g__UBA5195	s__UBA5195 sp903846015
GCA_903854805.1	PRJEB38681	SAMEA6956883	93.83	4.55	0	87.2877	635	49.7567	6032068	GB_GCA_903854805.1	p__Chloroflexota	c__Anaerolineae	o__Anaerolineales	f__EnvOPS12	g__UBA5195	s__UBA5195 sp903854805
GCA_903854505.1	PRJEB38681	SAMEA6956049	92.73	3.64	0	92.3935	53	57.8687	3680408	GB_GCA_903875215.1	p__Chloroflexota	c__Anaerolineae	o__Anaerolineales	f__EnvOPS12	g__UBA5195	s__UBA5195 sp903875215
GCA_903882765.1	PRJEB38681	SAMEA6951883	90	4.55	50	90.9179	506	46.8103	2750595	GB_GCA_903882765.1	p__Chloroflexota	c__Anaerolineae	o__Anaerolineales	f__EnvOPS12	g__UBA5195	s__UBA5195 sp903882765
GCA_903908605.1	PRJEB38681	SAMEA6951711	90	3.17	0	89.5139	612	52.2599	5770628	GB_GCA_903908605.1	p__Chloroflexota	c__Anaerolineae	o__Anaerolineales	f__EnvOPS12	g__UBA5195	s__UBA5195 sp903908605
GCA_903911955.1	PRJEB38681	SAMEA6956384	93.64	4.73	0	88.5281	518	52.1497	5444842	GB_GCA_903910795.1	p__Chloroflexota	c__Anaerolineae	o__Anaerolineales	f__EnvOPS12	g__UBA5195	s__UBA5195 sp903910795
GCA_002418215.1	PRJNA348753	SAMN06450754	95.91	2	0	87.5174	267	59.2161	4857925	GB_GCA_002418215.1	p__Chloroflexota	c__Anaerolineae	o__Anaerolineales	f__EnvOPS12	g__UBA5796	s__UBA5796 sp002418215
GCA_900696585.1	PRJEB31362	SAMEA5364557	90.91	2.18	20	91.1766	129	60.8416	3032009	GB_GCA_002473085.1	p__Chloroflexota	c__Anaerolineae	o__Anaerolineales	f__EnvOPS12	g__UBA7227	s__UBA7227 sp002473085
GCA_903931905.1	PRJEB38681	SAMEA6955012	92.73	4.58	57.14	89.9677	529	53.5016	3497502	GB_GCA_903884265.1	p__Chloroflexota	c__Anaerolineae	o__Anaerolineales	f__EnvOPS12	g__UBA877	s__UBA877 sp903884265
GCA_002789715.1	PRJNA362739	SAMN06660043	98.18	3.64	0	91.3421	145	56.6245	3095249	GB_GCA_001872455.1	p__Chloroflexota	c__Anaerolineae	o__Anaerolineales	f__EnvOPS12	g__UBA8950	s__UBA8950 sp001872455
GCA_003141675.1	PRJNA386568	SAMN08180112	95.45	2	0	87.4566	120	58.124	2822935	GB_GCA_003141675.1	p__Chloroflexota	c__Anaerolineae	o__Anaerolineales	f__RBG-16-64-43	g__FEN-1073	s__FEN-1073 sp003141675
GCA_013112575.1	PRJNA592266	SAMN13420036	91.82	3.64	0	91.3015	44	51.4097	5131584	GB_GCA_013112575.1	p__Chloroflexota	c__Anaerolineae	o__Anaerolineales	f__UBA11579	g__CFX15	s__CFX15 sp013112575
GCA_014191295.1	PRJDB6644	SAMD00166082	94.55	0.91	0	92.7147	172	61.2934	2615888	GB_GCA_003569365.1	p__Chloroflexota	c__Anaerolineae	o__Anaerolineales	f__UBA11657	g__BD1	s__BD1 sp003569365
GCA_903872065.1	PRJEB38681	SAMEA6956122	93.64	0.94	20	92.9354	927	57.9356	7488114	GB_GCA_903872065.1	p__Chloroflexota	c__Anaerolineae	o__Anaerolineales	f__UBA4823	g__CAIQJJ01	s__CAIQJJ01 sp903872065
GCA_011047095.1	PRJNA480137	SAMN09639410	99.09	4.55	0	91.9769	28	55.8481	4643231	GB_GCA_011047095.1	p__Chloroflexota	c__Anaerolineae	o__Anaerolineales	f__UBA6663	g__DSNW01	s__DSNW01 sp011047095
GCF_001306175.1	PRJNA224116	SAMN03274860	98.18	4.55	0	92.6868	12	59.5636	3559695	RS_GCF_001306175.1	p__Chloroflexota	c__Anaerolineae	o__Ardenticatenales	f__Ardenticatenaceae	g__Ardenticatena	s__Ardenticatena maritima
GCA_011192125.1	PRJNA605778	SAMN14094330	90.91	0.18	0	91.7333	165	65.4438	3374735	GB_GCA_011192125.1	p__Chloroflexota	c__Anaerolineae	o__B4-G1	f__DUEL01	g__DUEL01	s__DUEL01 sp011192125
GCA_011047785.1	PRJNA480137	SAMN09639371	90.45	2.73	33.33	87.612	82	64.5702	3453492	GB_GCA_011053895.1	p__Chloroflexota	c__Anaerolineae	o__B4-G1	f__DUEL01	g__SpSt-77	s__SpSt-77 sp011053895
GCA_014360895.1	PRJNA635524	SAMN15637580	90.45	1.82	0	90.1996	271	64.6397	3566237	GB_GCA_014360895.1	p__Chloroflexota	c__Anaerolineae	o__B4-G1	f__DUEL01	g__SpSt-77	s__SpSt-77 sp014360895
GCA_003562365.1	PRJNA434545	SAMN08574753	94.55	0.91	0	87.8321	570	60.1055	4985785	GB_GCA_003562365.1	p__Chloroflexota	c__Anaerolineae	o__B4-G1	f__SLSP01	g__PWVB01	s__PWVB01 sp003562365
GCA_007125545.1	PRJNA453733	SAMN10607171	93.54	0.76	50	90.8854	642	60.2061	5242505	GB_GCA_007125545.1	p__Chloroflexota	c__Anaerolineae	o__B4-G1	f__SLSP01	g__PWVB01	s__PWVB01 sp007125545
GCA_002238555.1	PRJNA326328	SAMN05959509	94.55	0	0	85.5552	111	63.1474	4630258	GB_GCA_002238555.1	p__Chloroflexota	c__Anaerolineae	o__Caldilineales	f__Bin34	g__Bin34	s__Bin34 sp002238555
GCA_009837875.1	PRJNA555144	SAMN12598377	94.27	0.91	100	86.3488	217	61.9489	4207373	GB_GCA_009841145.1	p__Chloroflexota	c__Anaerolineae	o__Caldilineales	f__Bin34	g__Bin34	s__Bin34 sp009841145
GCA_012271135.1	PRJNA545004	SAMN12097958	91.82	3.33	0	86.4135	175	62.382	4046059	GB_GCA_012271135.1	p__Chloroflexota	c__Anaerolineae	o__Caldilineales	f__Bin34	g__Bin34	s__Bin34 sp012271135
GCA_002238445.1	PRJNA326328	SAMN05959508	95.45	1.82	0	83.9919	120	58.4956	5553230	GB_GCA_002238445.1	p__Chloroflexota	c__Anaerolineae	o__Caldilineales	f__Caldilineaceae	g__Bin5	s__Bin5 sp002238445
GCA_009838625.1	PRJNA555144	SAMN12598339	96.36	0	0	86.7338	215	59.3543	5353615	GB_GCA_009838625.1	p__Chloroflexota	c__Anaerolineae	o__Caldilineales	f__Caldilineaceae	g__Bin5	s__Bin5 sp009838625
GCA_009840225.1	PRJNA555144	SAMN12598259	97.73	0.91	100	85.1599	425	59.8634	5602616	GB_GCA_009840225.1	p__Chloroflexota	c__Anaerolineae	o__Caldilineales	f__Caldilineaceae	g__Bin5	s__Bin5 sp009840225
GCA_009837805.1	PRJNA555144	SAMN12598381	93.36	0.18	0	88.488	479	60.3252	5028561	GB_GCA_009841235.1	p__Chloroflexota	c__Anaerolineae	o__Caldilineales	f__Caldilineaceae	g__Bin5	s__Bin5 sp009841235
GCA_011523365.1	PRJNA594068	SAMN13494906	98.18	0	0	85.2767	224	59.734	5671988	GB_GCA_011523365.1	p__Chloroflexota	c__Anaerolineae	o__Caldilineales	f__Caldilineaceae	g__Bin5	s__Bin5 sp011523365
GCF_000281175.1	PRJNA224116	SAMD00061033	100	1.82	0	89.5557	1	58.7671	5144873	RS_GCF_000281175.1	p__Chloroflexota	c__Anaerolineae	o__Caldilineales	f__Caldilineaceae	g__Caldilinea	s__Caldilinea aerophila
GCA_002391565.1	PRJNA348753	SAMN06457577	92.27	2.91	16.67	86.8967	794	60.9457	5864277	GB_GCA_002391565.1	p__Chloroflexota	c__Anaerolineae	o__Caldilineales	f__Caldilineaceae	g__Caldilinea	s__Caldilinea sp002391565
GCA_003451595.1	PRJNA417962	SAMN08017640	91.52	2.91	0	83.1837	827	60.8419	5720096	GB_GCA_003451595.1	p__Chloroflexota	c__Anaerolineae	o__Caldilineales	f__Caldilineaceae	g__Caldilinea	s__Caldilinea sp003451595
GCA_903820485.1	PRJEB38681	SAMEA6945647	91.82	3.64	14.29	91.8089	590	62.3084	4559532	GB_GCA_903858085.1	p__Chloroflexota	c__Anaerolineae	o__Caldilineales	f__Caldilineaceae	g__Caldilinea	s__Caldilinea sp903858085
GCA_903879975.1	PRJEB38681	SAMEA6955588	93.18	3.06	42.86	90.0312	867	60.6583	5320688	GB_GCA_903879975.1	p__Chloroflexota	c__Anaerolineae	o__Caldilineales	f__Caldilineaceae	g__Caldilinea	s__Caldilinea sp903879975
GCA_003577005.1	PRJNA450161	SAMN08931185	96.36	3.03	28.57	88.0752	854	59.4025	9366412	GB_GCA_003577005.1	p__Chloroflexota	c__Anaerolineae	o__Caldilineales	f__Caldilineaceae	g__CFX5	s__CFX5 sp003577005
GCA_013152585.1	PRJNA557557	SAMN12405791	90.91	1.09	0	88.6626	267	58.5739	3801810	GB_GCA_013152585.1	p__Chloroflexota	c__Anaerolineae	o__Caldilineales	f__J102	g__JAADGC01	s__JAADGC01 sp013152585
GCA_013151415.1	PRJNA557557	SAMN12405796	98.18	1.09	0	89.6773	222	58.2367	4520785	GB_GCA_013151415.1	p__Chloroflexota	c__Anaerolineae	o__Caldilineales	f__J102	g__JAADII01	s__JAADII01 sp013151415
GCA_002842085.1	PRJNA321556	SAMN06767624	95.45	1.82	0	83.649	643	62.8977	4450830	GB_GCA_002842085.1	p__Chloroflexota	c__Anaerolineae	o__CG2-30-64-16	f__CG2-30-64-16	g__CG2-30-64-16	s__CG2-30-64-16 sp002842085
GCA_002068935.1	PRJNA321808	SAMN05004175	96.28	4.61	0	89.3137	582	68.1201	3960873	GB_GCA_002068935.1	p__Chloroflexota	c__Anaerolineae	o__CG2-30-64-16	f__CG2-30-64-16	g__MWBF01	s__MWBF01 sp002068935
GCA_013693795.1	PRJNA606905	SAMN15246511	93.47	1.09	0	82.8976	1	63.902	4686057	GB_GCA_013693795.1	p__Chloroflexota	c__Anaerolineae	o__CG2-30-64-16	f__SSC4	g__SSC4	s__SSC4 sp013693795
GCA_013178015.1	PRJNA414521	SAMN14896060	97.71	1.83	0	87.9312	97	65.945	4567051	GB_GCA_013178015.1	p__Chloroflexota	c__Anaerolineae	o__DRVO01	f__DRVO01	g__Ch71	s__Ch71 sp013178015
GCA_012719195.1	PRJNA602310	SAMN13893641	92.2	1.1	0	91.4514	528	66.8321	2929200	GB_GCA_012719195.1	p__Chloroflexota	c__Anaerolineae	o__DRVO01	f__DRVO01	g__JAAYAV01	s__JAAYAV01 sp012719195
GCA_011048175.1	PRJNA480137	SAMN09639349	97.27	2.73	0	90.578	63	64.0747	3662620	GB_GCA_011048175.1	p__Chloroflexota	c__Anaerolineae	o__DSLN01	f__DSLN01	g__DSLN01	s__DSLN01 sp011048175
GCF_902812335.1	PRJNA224116	SAMEA6606258	92.73	2.42	25	91.3252	370	62.8289	3524499	RS_GCF_902812335.1	p__Chloroflexota	c__Anaerolineae	o__DSLN01	f__DSLN01	g__DSLN01	s__DSLN01 sp902812335
GCA_014360855.1	PRJNA635524	SAMN15637579	94.82	0.91	0	92.4154	442	64.6659	3100737	GB_GCA_014360855.1	p__Chloroflexota	c__Anaerolineae	o__DTPP01	f__JACIWP01	g__JACIWP01	s__JACIWP01 sp014360855
GCA_011176545.1	PRJNA605778	SAMN14094332	94.09	2.45	0	89.3197	239	61.7767	4432924	GB_GCA_011176545.1	p__Chloroflexota	c__Anaerolineae	o__DUEN01	f__DUEN01	g__DUEN01	s__DUEN01 sp011176545
GCA_013152435.1	PRJNA557557	SAMN12405793	96.36	2	0	87.0197	173	64.2572	4973004	GB_GCA_013152435.1	p__Chloroflexota	c__Anaerolineae	o__DUEN01	f__DUEN01	g__DUEN01	s__DUEN01 sp013152435
GCA_012689325.1	PRJNA602310	SAMN13893724	97.25	4.77	16.67	91.7702	580	66.7605	5293402	GB_GCA_012689325.1	p__Chloroflexota	c__Anaerolineae	o__JAAYEA01	f__JAAYEA01	g__JAAYEA01	s__JAAYEA01 sp012689325
GCA_011525915.1	PRJNA598059	SAMN13738147	98.18	4.91	0	91.2875	106	54.0671	7461200	GB_GCA_011525915.1	p__Chloroflexota	c__Anaerolineae	o__Promineofilales	f__Promineofilaceae	g__CAADGU01	s__CAADGU01 sp011525915
GCA_014584575.1	PRJNA335309	SAMN15870300	98.18	3.82	0	90.1124	85	56.4132	7241711	GB_GCA_014584575.1	p__Chloroflexota	c__Anaerolineae	o__Promineofilales	f__Promineofilaceae	g__CAADGU01	s__CAADGU01 sp014584575
GCA_003696605.1	PRJNA392119	SAMN10119933	92.73	2.27	0	92.2828	705	50.4899	4916558	GB_GCA_003696605.1	p__Chloroflexota	c__Anaerolineae	o__Promineofilales	f__Promineofilaceae	g__J033	s__J033 sp003696605
GCA_009937635.1	PRJNA514927	SAMN13826819	90.91	2	0	88.6433	658	52.0814	6563286	GB_GCA_009937635.1	p__Chloroflexota	c__Anaerolineae	o__Promineofilales	f__Promineofilaceae	g__JAACFF01	s__JAACFF01 sp009937635
GCF_900066015.1	PRJNA224116	SAMEA3627641	93.64	3.64	25	90.0182	3	64.2835	5033966	RS_GCF_900066015.1	p__Chloroflexota	c__Anaerolineae	o__Promineofilales	f__Promineofilaceae	g__Promineofilum	s__Promineofilum breve
GCA_011524645.1	PRJNA594068	SAMN13494948	98.18	3.64	0	86.6274	603	48.7789	5809359	GB_GCA_011524645.1	p__Chloroflexota	c__Anaerolineae	o__Promineofilales	f__Promineofilaceae	g__WTJY01	s__WTJY01 sp011524645
GCA_903860275.1	PRJEB38681	SAMEA6946070	91.36	2.18	50	91.6603	530	52.0183	3187221	GB_GCA_903877335.1	p__Chloroflexota	c__Anaerolineae	o__SBR1031	f__A4b	g__CAIRDJ01	s__CAIRDJ01 sp903877335
GCA_014338005.1	PRJNA482907	SAMN09714639	92.73	0.18	0	91.7096	214	60.8688	4824844	GB_GCA_014338005.1	p__Chloroflexota	c__Anaerolineae	o__SBR1031	f__A4b	g__CFX2	s__CFX2 sp014338005
GCA_903864435.1	PRJEB38681	SAMEA6951779	90.91	1.01	50	91.0156	464	58.8451	5389799	GB_GCA_903864435.1	p__Chloroflexota	c__Anaerolineae	o__SBR1031	f__A4b	g__CFX2	s__CFX2 sp903864435
GCA_002699585.1	PRJNA391943	SAMN07618352	92.73	0.91	0	88.9584	42	52.9535	6701443	GB_GCA_002699585.1	p__Chloroflexota	c__Anaerolineae	o__SBR1031	f__A4b	g__GCA-2699585	s__GCA-2699585 sp002699585
GCA_002702065.1	PRJNA391943	SAMN07618355	97.27	0.61	0	91.6064	14	57.0551	6768311	GB_GCA_002702065.1	p__Chloroflexota	c__Anaerolineae	o__SBR1031	f__A4b	g__GCA-2702065	s__GCA-2702065 sp002702065
GCA_003696565.1	PRJNA392119	SAMN10119938	92.73	1.82	50	92.4084	502	45.7646	4145839	GB_GCA_003696565.1	p__Chloroflexota	c__Anaerolineae	o__SBR1031	f__A4b	g__J038	s__J038 sp003696565
GCA_007693385.1	PRJNA377096	SAMN10237399	97.88	0.18	0	92.4134	137	58.5205	3587501	GB_GCA_007693385.1	p__Chloroflexota	c__Anaerolineae	o__SBR1031	f__A4b	g__J038	s__J038 sp007693385
GCA_900696605.1	PRJEB31362	SAMEA5364556	97.73	0.91	0	90.7583	220	62.7762	4106295	GB_GCA_001567485.1	p__Chloroflexota	c__Anaerolineae	o__SBR1031	f__A4b	g__OLB13	s__OLB13 sp001567485
GCA_011047115.1	PRJNA480137	SAMN09639409	92.73	0	0	90.2377	27	54.8053	5069369	GB_GCA_011047115.1	p__Chloroflexota	c__Anaerolineae	o__SBR1031	f__A4b	g__OLB15	s__OLB15 sp011047115
GCA_013360465.1	PRJNA601861	SAMN14239041	93.64	0	0	91.0997	256	61.8755	5929175	GB_GCA_013360465.1	p__Chloroflexota	c__Anaerolineae	o__SBR1031	f__A4b	g__OLB15	s__OLB15 sp013360465
GCA_002238485.1	PRJNA326328	SAMN05958607	91.82	0	0	92.4811	22	59.3083	3661680	GB_GCA_002238485.1	p__Chloroflexota	c__Anaerolineae	o__SBR1031	f__A4b	g__UBA6055	s__UBA6055 sp002238485
GCA_002428985.1	PRJNA348753	SAMN06455368	93.33	2.27	0	89.8969	77	43.1619	8509053	GB_GCA_002428985.1	p__Chloroflexota	c__Anaerolineae	o__SBR1031	f__A4b	g__UBA6055	s__UBA6055 sp002428985
GCA_009838095.1	PRJNA555144	SAMN12598367	90	0.91	0	92.0216	307	59.8543	3403520	GB_GCA_009840575.1	p__Chloroflexota	c__Anaerolineae	o__SBR1031	f__A4b	g__UBA6055	s__UBA6055 sp009840575
GCA_009841405.1	PRJNA555144	SAMN12598198	90.91	0.91	0	90.0417	198	61.2292	4237473	GB_GCA_009841405.1	p__Chloroflexota	c__Anaerolineae	o__SBR1031	f__A4b	g__UBA6055	s__UBA6055 sp009841405
GCA_011523515.1	PRJNA594068	SAMN13494910	91.82	0.91	0	90.2639	149	59.6361	4147540	GB_GCA_011523515.1	p__Chloroflexota	c__Anaerolineae	o__SBR1031	f__A4b	g__UBA6055	s__UBA6055 sp011523515
GCA_011523545.1	PRJNA594068	SAMN13494907	90.91	0	0	89.2991	119	60.0201	4541718	GB_GCA_011523545.1	p__Chloroflexota	c__Anaerolineae	o__SBR1031	f__A4b	g__UBA6055	s__UBA6055 sp011523545
GCA_011523705.1	PRJNA594068	SAMN13494909	92.55	0	0	89.3418	260	58.9219	4705304	GB_GCA_011523705.1	p__Chloroflexota	c__Anaerolineae	o__SBR1031	f__A4b	g__UBA6055	s__UBA6055 sp011523705
GCA_011523735.1	PRJNA594068	SAMN13494908	90.91	0	0	90.0376	178	57.2769	4366791	GB_GCA_011523735.1	p__Chloroflexota	c__Anaerolineae	o__SBR1031	f__A4b	g__UBA6055	s__UBA6055 sp011523735
GCA_011525385.1	PRJNA594068	SAMN13494911	90	0	0	88.2253	135	56.6271	4913133	GB_GCA_011525385.1	p__Chloroflexota	c__Anaerolineae	o__SBR1031	f__A4b	g__UBA6055	s__UBA6055 sp011525385
GCA_003242205.1	PRJNA317502	SAMN09092808	91.82	1.27	33.33	90.3655	557	60.9617	4682109	GB_GCA_003242205.1	p__Chloroflexota	c__Anaerolineae	o__SBR1031	f__A4b	g__ZC4RG36	s__ZC4RG36 sp003242205
GCA_013178165.1	PRJNA414521	SAMN14896041	93.64	1.82	0	90.382	52	62.824	4185105	GB_GCA_013178165.1	p__Chloroflexota	c__Anaerolineae	o__SBR1031	f__Ch27	g__Ch27	s__Ch27 sp013178165
GCA_013112715.1	PRJNA592266	SAMN13420031	98.48	0	0	91.884	76	51.1664	5550143	GB_GCA_013112715.1	p__Chloroflexota	c__Anaerolineae	o__SBR1031	f__J027	g__CFX10	s__CFX10 sp013112715
GCA_003697365.1	PRJNA392119	SAMN10119927	94.55	0.91	100	93.38	220	43.4522	3118084	GB_GCA_003697365.1	p__Chloroflexota	c__Anaerolineae	o__SBR1031	f__J027	g__J027	s__J027 sp003697365
GCA_010092845.1	PRJNA602167	SAMN13884824	91.82	2.73	0	91.8425	312	55.7151	3856940	GB_GCA_010092845.1	p__Chloroflexota	c__Anaerolineae	o__SBR1031	f__J027	g__J027	s__J027 sp010092845
GCA_012729765.1	PRJNA602310	SAMN13893684	91.82	2.73	33.33	89.8079	154	64.1945	4747917	GB_GCA_012729765.1	p__Chloroflexota	c__Anaerolineae	o__SBR1031	f__UBA2029	g__JAAYCM01	s__JAAYCM01 sp012729765
GCF_003569045.1	PRJNA224116	SAMD00113762	95.45	2.91	0	87.9497	9	62.938	6202555	RS_GCF_003569045.1	p__Chloroflexota	c__Anaerolineae	o__SBR1031	f__UBA2029	g__MO-CFX2	s__MO-CFX2 sp003569045
GCA_002352035.1	PRJNA348753	SAMN06455045	93.64	4.55	0	89.2147	368	56.952	4180515	GB_GCA_002352035.1	p__Chloroflexota	c__Anaerolineae	o__SBR1031	f__UBA2796	g__UBA2796	s__UBA2796 sp002352035
GCA_010092885.1	PRJNA602167	SAMN13884825	95.45	0	0	93.8427	431	61.4839	4058949	GB_GCA_010092885.1	p__Chloroflexota	c__Anaerolineae	o__SBR1031	f__UBA3940	g__TC-195	s__TC-195 sp010092885
GCA_011333005.1	PRJNA480137	SAMN09640048	91.28	0.18	0	88.7169	151	54.6297	2357921	GB_GCA_011333005.1	p__Chloroflexota	c__Anaerolineae	o__SpSt-600	f__SpSt-600	g__SpSt-600	s__SpSt-600 sp011333005
GCA_003154115.1	PRJNA386568	SAMN08179774	95.81	4.55	0	88.2638	516	57.5887	7698003	GB_GCA_003154115.1	p__Chloroflexota	c__Anaerolineae	o__Thermoflexales	f__Fen-1058	g__Fen-1058	s__Fen-1058 sp003154115
GCA_903898895.1	PRJEB38681	SAMEA6955204	92.88	4.55	0	92.2916	719	57.8824	6283120	GB_GCA_903921365.1	p__Chloroflexota	c__Anaerolineae	o__Thermoflexales	f__J036	g__CAIXPS01	s__CAIXPS01 sp903921365
GCA_003696945.1	PRJNA392119	SAMN10119936	92.27	0.1	0	91.7134	150	63.7023	3068507	RS_GCF_012931985.1	p__Chloroflexota	c__Anaerolineae	o__Thermoflexales	f__J036	g__Roseilinea	s__Roseilinea sp003696945
GCF_900187885.1	PRJNA224116	SAMN02746019	97.27	0.91	0	89.3715	87	67.3468	3216964	RS_GCF_900187885.1	p__Chloroflexota	c__Anaerolineae	o__Thermoflexales	f__Thermoflexaceae	g__Thermoflexus	s__Thermoflexus hugenholtzii
GCA_002898735.1	PRJDB6348	SAMD00093772	90.45	1.09	25	87.7957	175	66.0511	2931246	GB_GCA_002898735.1	p__Chloroflexota	c__Anaerolineae	o__Thermoflexales	f__Thermoflexaceae	g__Thermoflexus	s__Thermoflexus sp002898735
GCA_011055825.1	PRJNA480137	SAMN09639272	95.45	1.82	25	88.0417	56	65.0617	3227897	GB_GCA_011048055.1	p__Chloroflexota	c__Anaerolineae	o__Thermoflexales	f__Thermoflexaceae	g__Thermoflexus	s__Thermoflexus sp011048055
GCA_012729455.1	PRJNA602310	SAMN13893700	94.19	0.92	0	93.5255	30	60.6823	2638352	GB_GCA_012729455.1	p__Chloroflexota	c__Anaerolineae	o__UBA1429	f__UBA1429	g__JAAYDC01	s__JAAYDC01 sp012729455
GCA_012729155.1	PRJNA602310	SAMN13893716	92.66	4.59	0	93.2149	470	63.6884	2903892	GB_GCA_012729155.1	p__Chloroflexota	c__Anaerolineae	o__UBA1429	f__UBA1429	g__JAAYDS01	s__JAAYDS01 sp012729155
GCA_012719135.1	PRJNA602310	SAMN13893642	98.17	2.75	33.33	91.4891	101	63.6417	2642639	GB_GCA_012719135.1	p__Chloroflexota	c__Anaerolineae	o__UBA1429	f__UBA1429	g__JAAYED01	s__JAAYED01 sp012719135
GCA_012728955.1	PRJNA602310	SAMN13893727	90.45	4.59	0	90.88	317	64.5681	2644010	GB_GCA_012728955.1	p__Chloroflexota	c__Anaerolineae	o__UBA1429	f__UBA1429	g__JAAYED01	s__JAAYED01 sp012728955
GCA_002329325.1	PRJNA348753	SAMN06456895	95.28	4.67	0	89.4545	139	67.1793	3282820	GB_GCA_002329325.1	p__Chloroflexota	c__Anaerolineae	o__UBA1429	f__UBA1429	g__UBA1429	s__UBA1429 sp002329325
GCA_007132185.1	PRJNA453733	SAMN10610577	98.17	1.92	0	90.1755	246	61.9244	3387589	GB_GCA_007132185.1	p__Chloroflexota	c__Anaerolineae	o__UBA1429	f__UBA1429	g__UBA1429	s__UBA1429 sp007132185
GCA_014360825.1	PRJNA635524	SAMN15637583	91.74	0	0	91.1872	66	56.8427	2885681	GB_GCA_014360825.1	p__Chloroflexota	c__Anaerolineae	o__UBA2200	f__JACIWT01	g__JACIWT01	s__JACIWT01 sp014360825
GCA_004295045.1	PRJNA516038	SAMN10782646	91.52	1.09	0	92.0516	91	53.6694	4951631	GB_GCA_004295045.1	p__Chloroflexota	c__Anaerolineae	o__UBA4142	f__SHND01	g__SHND01	s__SHND01 sp004295045
GCA_903825565.1	PRJEB38681	SAMEA6956073	92.35	4.52	58.33	91.5035	530	58.1226	6370768	GB_GCA_903825565.1	p__Chloroflexota	c__Anaerolineae	o__UBA4142	f__UBA4142	g__CAIKBD01	s__CAIKBD01 sp903825565
GCA_001898225.1	PRJNA279279	SAMN05660552	95.01	3.77	0	85.9262	151	53.7185	9249445	GB_GCA_001898225.1	p__Chloroflexota	c__Chloroflexia	o__54-19	f__54-19	g__54-19	s__54-19 sp001898225
GCF_902812345.1	PRJNA224116	SAMEA6606250	96.33	3.85	20	85.7121	674	53.8815	6722966	RS_GCF_902812345.1	p__Chloroflexota	c__Chloroflexia	o__54-19	f__54-19	g__54-19	s__54-19 sp902812345
GCA_013390945.1	PRJNA640240	SAMN15371448	96.33	1.56	0	86.3053	564	47.7435	6352488	GB_GCA_013390945.1	p__Chloroflexota	c__Chloroflexia	o__54-19	f__54-19	g__L227-5C	s__L227-5C sp013390945
GCA_013390565.1	PRJNA640240	SAMN15371435	98.17	1.38	0	87.6465	57	46.7845	6014222	GB_GCA_013390565.1	p__Chloroflexota	c__Chloroflexia	o__54-19	f__54-19	g__L227-S17	s__L227-S17 sp013390565
GCA_903868955.1	PRJEB38681	SAMEA6947460	97.64	3.77	0	86.8994	836	64.7981	5947275	GB_GCA_903916565.1	p__Chloroflexota	c__Chloroflexia	o__Chloroflexales	f__Chloroflexaceae	g__CAIWXH01	s__CAIWXH01 sp903916565
GCF_000021945.1	PRJNA224116	SAMN00623036	99.69	0	0	88.7361	1	56.4285	4684931	RS_GCF_000021945.1	p__Chloroflexota	c__Chloroflexia	o__Chloroflexales	f__Chloroflexaceae	g__Chloroflexus	s__Chloroflexus aggregans
GCA_003514535.1	PRJNA417962	SAMN08019341	99.69	0	0	84.0668	300	56.5168	5048715	RS_GCF_000018865.1	p__Chloroflexota	c__Chloroflexia	o__Chloroflexales	f__Chloroflexaceae	g__Chloroflexus	s__Chloroflexus aurantiacus
GCF_001650695.1	PRJNA224116	SAMN04851315	100	0	0	85.9452	131	60.6496	5136885	RS_GCF_001650695.1	p__Chloroflexota	c__Chloroflexia	o__Chloroflexales	f__Chloroflexaceae	g__Chloroflexus	s__Chloroflexus islandicus
GCF_000516515.1	PRJNA224116	SAMN02597278	100	0	0	84.7275	4	53.9259	4890986	RS_GCF_000516515.1	p__Chloroflexota	c__Chloroflexia	o__Chloroflexales	f__Chloroflexaceae	g__Chloroflexus	s__Chloroflexus sp000516515
GCF_000735195.1	PRJNA224116	SAMN02905655	100	0	0	86.3872	251	54.2624	4770266	RS_GCF_000735195.1	p__Chloroflexota	c__Chloroflexia	o__Chloroflexales	f__Chloroflexaceae	g__Chloroflexus	s__Chloroflexus sp000735195
GCF_002532075.1	PRJNA224116	SAMN05187184	99.69	0.19	0	89.8456	200	58.8291	5841167	RS_GCF_002532075.1	p__Chloroflexota	c__Chloroflexia	o__Chloroflexales	f__Chloroflexaceae	g__Chloroploca	s__Chloroploca asiatica
GCF_004138165.1	PRJNA224116	SAMN10593547	99.69	0.19	0	88.7939	183	58.8585	6376501	RS_GCF_004138165.1	p__Chloroflexota	c__Chloroflexia	o__Chloroflexales	f__Chloroflexaceae	g__Chloroploca	s__Chloroploca sp004138165
GCF_004762035.1	PRJNA224116	SAMN10963493	99.69	0.19	0	88.8976	298	58.5261	6422898	RS_GCF_004762035.1	p__Chloroflexota	c__Chloroflexia	o__Chloroflexales	f__Chloroflexaceae	g__Chloroploca	s__Chloroploca sp004762035
GCA_012032775.1	PRJNA612530	SAMN14376485	92.14	1.89	0	88.8798	374	60.6542	6265436	GB_GCA_012032775.1	p__Chloroflexota	c__Chloroflexia	o__Chloroflexales	f__Chloroflexaceae	g__JAAUQO01	s__JAAUQO01 sp012032775
GCA_012034075.1	PRJNA612530	SAMN14376500	94.34	1.13	0	87.6164	369	54.5297	5005010	GB_GCA_012034075.1	p__Chloroflexota	c__Chloroflexia	o__Chloroflexales	f__Chloroflexaceae	g__JAAURD01	s__JAAURD01 sp012034075
GCA_012031155.1	PRJNA612530	SAMN14376577	93.84	3.96	13.33	89.5716	379	58.1661	4833211	GB_GCA_012033195.1	p__Chloroflexota	c__Chloroflexia	o__Chloroflexales	f__Chloroflexaceae	g__JAAUSQ01	s__JAAUSQ01 sp012033195
GCA_012032475.1	PRJNA612530	SAMN14376547	95.91	1.05	0	89.9389	311	61.0138	4611664	GB_GCA_012032475.1	p__Chloroflexota	c__Chloroflexia	o__Chloroflexales	f__Chloroflexaceae	g__JAAUSY01	s__JAAUSY01 sp012032475
GCA_012031225.1	PRJNA612530	SAMN14376574	98.74	0	0	90.5403	224	60.1597	4210924	GB_GCA_012031225.1	p__Chloroflexota	c__Chloroflexia	o__Chloroflexales	f__Chloroflexaceae	g__JAAUTZ01	s__JAAUTZ01 sp012031225
GCA_013388805.1	PRJNA564648	SAMN14673734	94.97	0.94	0	87.6171	459	67.7099	4567438	GB_GCA_013388805.1	p__Chloroflexota	c__Chloroflexia	o__Chloroflexales	f__Chloroflexaceae	g__JACAEO01	s__JACAEO01 sp013388805
GCA_004367505.1	PRJNA517304	SAMN10825111	98.11	2.83	0	87.729	301	67.7864	6934041	GB_GCA_004367505.1	p__Chloroflexota	c__Chloroflexia	o__Chloroflexales	f__Chloroflexaceae	g__OHK40	s__OHK40 sp004367505
GCF_004138135.1	PRJNA224116	SAMN10593108	99.69	0.94	0	89.3068	144	58.5986	4463428	RS_GCF_004138135.1	p__Chloroflexota	c__Chloroflexia	o__Chloroflexales	f__Chloroflexaceae	g__Oscillochloris	s__Oscillochloris fontis
GCF_004138175.2	PRJNA224116	SAMN10593418	99.21	0.94	0	87.8403	127	65.2112	6269253	RS_GCF_004138175.2	p__Chloroflexota	c__Chloroflexia	o__Chloroflexales	f__Chloroflexaceae	g__Oscillochloris	s__Oscillochloris sp004138175
GCA_903877945.1	PRJEB38681	SAMEA6950587	94.34	1.99	66.67	86.7932	696	62.0872	4525788	GB_GCA_903877945.1	p__Chloroflexota	c__Chloroflexia	o__Chloroflexales	f__Chloroflexaceae	g__Oscillochloris	s__Oscillochloris sp903877945
GCA_903901705.1	PRJEB38681	SAMEA6950578	95.88	1.32	0	87.6619	737	64.7595	4391034	GB_GCA_903887465.1	p__Chloroflexota	c__Chloroflexia	o__Chloroflexales	f__Chloroflexaceae	g__Oscillochloris	s__Oscillochloris sp903887465
GCA_903920315.1	PRJEB38681	SAMEA6953488	95.34	4.72	77.78	88.8373	716	60.7272	5498351	GB_GCA_903920315.1	p__Chloroflexota	c__Chloroflexia	o__Chloroflexales	f__Chloroflexaceae	g__Oscillochloris	s__Oscillochloris sp903920315
GCF_000152145.1	PRJNA224116	SAMN02469416	98.74	0.94	0	89.0556	146	59.2605	4373075	RS_GCF_000152145.1	p__Chloroflexota	c__Chloroflexia	o__Chloroflexales	f__Chloroflexaceae	g__Oscillochloris	s__Oscillochloris trichoides
GCF_002532535.1	PRJNA224116	SAMN07514207	99.21	2.08	0	86.645	348	58.0151	5621074	RS_GCF_002532535.1	p__Chloroflexota	c__Chloroflexia	o__Chloroflexales	f__Chloroflexaceae	g__Viridilinea	s__Viridilinea mediisalina
GCA_903861755.1	PRJEB38681	SAMEA6945631	92.05	3.21	33.33	89.0048	688	60.5841	4454460	GB_GCA_903915775.1	p__Chloroflexota	c__Chloroflexia	o__Chloroflexales	f__Chloroflexaceae	g__Viridilinea	s__Viridilinea sp903915775
GCA_003512625.1	PRJNA417962	SAMN08019338	98.18	1.82	0	88.4182	231	50.306	5983191	GB_GCA_000018565.1	p__Chloroflexota	c__Chloroflexia	o__Chloroflexales	f__Herpetosiphonaceae	g__Herpetosiphon	s__Herpetosiphon aurantiacus
GCF_001306135.1	PRJNA224116	SAMN03274862	99.09	0.91	0	87.9726	46	50.7482	6140412	RS_GCF_001306135.1	p__Chloroflexota	c__Chloroflexia	o__Chloroflexales	f__Herpetosiphonaceae	g__Herpetosiphon	s__Herpetosiphon geysericola
GCF_003205875.1	PRJNA224116	SAMN08578589	99.09	1.82	0	87.526	169	50.7714	6140145	RS_GCF_003205875.1	p__Chloroflexota	c__Chloroflexia	o__Chloroflexales	f__Herpetosiphonaceae	g__Herpetosiphon	s__Herpetosiphon llansteffanensis
GCA_013821605.1	PRJNA630822	SAMN15052306	97.88	0.2	0	90.6264	264	57.4683	5883265	GB_GCA_013821605.1	p__Chloroflexota	c__Chloroflexia	o__Chloroflexales	f__Herpetosiphonaceae	g__JACDGP01	s__JACDGP01 sp013821605
GCF_000526415.1	PRJNA224116	SAMN02584935	97.58	0	0	89.5793	4	65.7738	4475263	RS_GCF_000526415.1	p__Chloroflexota	c__Chloroflexia	o__Chloroflexales	f__Herpetosiphonaceae	g__JKG1	s__JKG1 sp000526415
GCA_013538855.1	PRJNA392119	SAMN14439215	96.97	0.91	0	88.0648	285	62.5932	6335032	GB_GCA_013538855.1	p__Chloroflexota	c__Chloroflexia	o__Chloroflexales	f__Herpetosiphonaceae	g__OHK22	s__OHK22 sp013538855
GCA_013122405.1	PRJNA579290	SAMN13108526	94.81	1.89	0	86.1527	43	48.9312	8247287	GB_GCA_013122435.1	p__Chloroflexota	c__Chloroflexia	o__Chloroflexales	f__Roseiflexaceae	g__AL-N1	s__AL-N1 sp013122435
GCA_013388755.1	PRJNA564648	SAMN14673736	99.69	0.66	0	89.07	145	62.3156	5076079	GB_GCA_013388755.1	p__Chloroflexota	c__Chloroflexia	o__Chloroflexales	f__Roseiflexaceae	g__JACAEQ01	s__JACAEQ01 sp013388755
GCF_000017805.1	PRJNA224116	SAMN02598306	99.69	0	0	86.0966	1	60.6901	5723298	RS_GCF_000017805.1	p__Chloroflexota	c__Chloroflexia	o__Chloroflexales	f__Roseiflexaceae	g__Roseiflexus	s__Roseiflexus castenholzii
GCF_000016665.1	PRJNA224116	SAMN02598362	99.69	1.83	0	87.6706	1	60.3873	5801598	RS_GCF_000016665.1	p__Chloroflexota	c__Chloroflexia	o__Chloroflexales	f__Roseiflexaceae	g__Roseiflexus	s__Roseiflexus sp000016665
GCF_009268125.1	PRJNA224116	SAMN12885550	100	0.94	0	84.895	58	65.7746	6761922	RS_GCF_009268125.1	p__Chloroflexota	c__Chloroflexia	o__Chloroflexales	f__Roseiflexaceae	g__SDU3-3	s__SDU3-3 sp009268125
GCA_002292925.1	PRJNA348753	SAMN06456959	94.97	0	0	88.692	562	53.5572	3244174	GB_GCA_002292925.1	p__Chloroflexota	c__Chloroflexia	o__Chloroflexales	f__Roseiflexaceae	g__UBA965	s__UBA965 sp002292925
GCA_903868295.1	PRJEB38681	SAMEA6952459	91.93	2.83	100	92.5983	625	56.965	3226003	GB_GCA_903868295.1	p__Chloroflexota	c__Chloroflexia	o__Chloroflexales	f__Roseiflexaceae	g__UBA965	s__UBA965 sp903868295
GCA_903862005.1	PRJEB38681	SAMEA6949564	92.14	1.18	100	91.8577	652	53.6076	3416216	GB_GCA_903889425.1	p__Chloroflexota	c__Chloroflexia	o__Chloroflexales	f__Roseiflexaceae	g__UBA965	s__UBA965 sp903889425
GCA_903940205.1	PRJEB38681	SAMEA6949866	94.78	1.42	100	92.6369	605	56.7191	3101441	GB_GCA_903932805.1	p__Chloroflexota	c__Chloroflexia	o__Chloroflexales	f__Roseiflexaceae	g__UBA965	s__UBA965 sp903932805
GCA_011333455.1	PRJNA480137	SAMN09639999	94.04	0.18	0	92.3595	122	65.3446	2970822	GB_GCA_011333455.1	p__Chloroflexota	c__Chloroflexia	o__DTKN01	f__DTKN01	g__DTKN01	s__DTKN01 sp011333455
GCF_902810765.1	PRJNA224116	SAMEA6605035	99.06	2.52	25	88.2738	384	67.4194	3981232	RS_GCF_902810765.1	p__Chloroflexota	c__Chloroflexia	o__Thermobaculales	f__Thermobaculaceae	g__CADDYR01	s__CADDYR01 sp902810765
GCF_000025005.1	PRJNA224116	SAMN00017581	98.58	0	0	91.5992	2	53.5073	3101581	RS_GCF_000025005.1	p__Chloroflexota	c__Chloroflexia	o__Thermobaculales	f__Thermobaculaceae	g__Thermobaculum	s__Thermobaculum terrenum
GCA_902806415.1	PRJEB36534	SAMEA6526600	92.77	2.2	0	83.3962	425	68.6288	5164302	GB_GCA_902806415.1	p__Chloroflexota	c__Chloroflexia	o__Thermomicrobiales	f__CADCWN01	g__CADCWN01	s__CADCWN01 sp902806415
GCF_000297255.1	PRJNA224116	SAMEA2272167	97.2	0.93	0	83.5308	736	62.5604	3888104	RS_GCF_000297255.1	p__Chloroflexota	c__Chloroflexia	o__Thermomicrobiales	f__Thermomicrobiaceae	g__Nitrolancea	s__Nitrolancea hollandica
GCA_007124015.1	PRJNA453733	SAMN10607247	93.46	1.61	75	89.3906	488	58.961	3570188	GB_GCA_007133615.1	p__Chloroflexota	c__Chloroflexia	o__Thermomicrobiales	f__Thermomicrobiaceae	g__SLMJ01	s__SLMJ01 sp007133615
GCA_007695115.1	PRJNA377096	SAMN10237417	97.2	0	0	89.1535	186	58.7384	3676280	GB_GCA_007695115.1	p__Chloroflexota	c__Chloroflexia	o__Thermomicrobiales	f__Thermomicrobiaceae	g__SLMJ01	s__SLMJ01 sp007695115
GCA_003242625.1	PRJNA317502	SAMN09092798	95.33	0.93	100	86.659	412	68.2252	3922951	RS_GCF_000024985.1	p__Chloroflexota	c__Chloroflexia	o__Thermomicrobiales	f__Thermomicrobiaceae	g__Sphaerobacter	s__Sphaerobacter thermophilus
GCF_000021685.1	PRJNA224116	SAMN02603430	98.13	0	0	88.5522	2	64.2848	2920744	RS_GCF_000021685.1	p__Chloroflexota	c__Chloroflexia	o__Thermomicrobiales	f__Thermomicrobiaceae	g__Thermomicrobium	s__Thermomicrobium roseum
GCA_011047935.1	PRJNA480137	SAMN09639362	98.13	0.93	100	86.7176	36	61.5294	3045291	GB_GCA_002898255.1	p__Chloroflexota	c__Chloroflexia	o__Thermomicrobiales	f__Thermomicrobiaceae	g__Thermomicrobium	s__Thermomicrobium sp002898255
GCF_000744775.1	PRJNA224116	SAMN02744724	97.82	0	0	90.4252	4	59.9088	2934621	RS_GCF_000744775.1	p__Chloroflexota	c__Chloroflexia	o__Thermomicrobiales	f__Thermomicrobiaceae	g__Thermorudis	s__Thermorudis peleae
GCA_902806325.1	PRJEB36534	SAMEA6526655	94.5	1.05	50	85.4917	306	70.8448	4167330	GB_GCA_902806325.1	p__Chloroflexota	c__Chloroflexia	o__Thermomicrobiales	f__UBA6265	g__CADCWE01	s__CADCWE01 sp902806325
GCA_902806345.1	PRJEB36534	SAMEA6526641	97.48	0.09	100	83.4747	394	71.217	5078607	GB_GCA_902806345.1	p__Chloroflexota	c__Chloroflexia	o__Thermomicrobiales	f__UBA6265	g__CADCWF01	s__CADCWF01 sp902806345
GCA_902806335.1	PRJEB36534	SAMEA6526631	98.43	0.94	0	78.8242	339	73.3459	4820188	GB_GCA_902806335.1	p__Chloroflexota	c__Chloroflexia	o__Thermomicrobiales	f__UBA6265	g__CADCWG01	s__CADCWG01 sp902806335
GCA_902806405.1	PRJEB36534	SAMEA6526601	93.4	0.94	0	81.2818	273	71.8479	4616060	GB_GCA_902806405.1	p__Chloroflexota	c__Chloroflexia	o__Thermomicrobiales	f__UBA6265	g__CADCWL01	s__CADCWL01 sp902806405
GCA_013697005.1	PRJNA630822	SAMN15052061	96.7	0.94	100	89.2365	479	64.382	4045993	GB_GCA_013697005.1	p__Chloroflexota	c__Chloroflexia	o__Thermomicrobiales	f__UBA6265	g__JACCXM01	s__JACCXM01 sp013697005
GCA_002239025.1	PRJNA326328	SAMN05959533	94.72	0.99	0	88.6203	66	62.2699	3681665	GB_GCA_002239025.1	p__Chloroflexota	c__Dehalococcoidia	o__Bin125	f__Bin125	g__Bin125	s__Bin125 sp002239025
GCA_009835345.1	PRJNA555144	SAMN12598504	91.75	1.98	50	91.0052	192	64.2027	2914763	GB_GCA_009838735.1	p__Chloroflexota	c__Dehalococcoidia	o__Bin125	f__Bin125	g__Bin125	s__Bin125 sp009838735
GCA_009842405.1	PRJNA555144	SAMN12598706	93.73	1.1	50	91.9677	195	65.3712	2751461	GB_GCA_009838915.1	p__Chloroflexota	c__Dehalococcoidia	o__Bin125	f__Bin125	g__Bin125	s__Bin125 sp009838915
GCA_003552785.1	PRJNA434545	SAMN08575186	92.08	2.56	25	88.6804	126	46.474	1422391	GB_GCA_003552785.1	p__Chloroflexota	c__Dehalococcoidia	o__Dehalococcoidales	f__CSSed11-197	g__CSSed11-197	s__CSSed11-197 sp003552785
GCF_002356375.1	PRJNA224116	SAMD00045709	99.01	0	0	90.6942	1	48.7991	1387782	RS_GCF_000011905.1	p__Chloroflexota	c__Dehalococcoidia	o__Dehalococcoidales	f__Dehalococcoidaceae	g__Dehalococcoides	s__Dehalococcoides mccartyi
GCF_000499365.1	PRJNA224116	SAMN02641533	99.01	0	0	90.1564	1	47.0035	1407418	RS_GCF_001889305.1	p__Chloroflexota	c__Dehalococcoidia	o__Dehalococcoidales	f__Dehalococcoidaceae	g__Dehalococcoides	s__Dehalococcoides mccartyi_A
GCA_001678035.1	PRJNA320716	SAMN05190593	99.01	0	0	90.2585	16	46.8026	1471598	RS_GCF_000830885.1	p__Chloroflexota	c__Dehalococcoidia	o__Dehalococcoidales	f__Dehalococcoidaceae	g__Dehalococcoides	s__Dehalococcoides mccartyi_B
GCF_001466665.1	PRJNA224116	SAMN03068710	95.21	0	0	89.6489	2	55.8761	1851576	RS_GCF_001466665.1	p__Chloroflexota	c__Dehalococcoidia	o__Dehalococcoidales	f__Dehalococcoidaceae	g__Dehalogenimonas	s__Dehalogenimonas alkenigignens
GCF_001953175.1	PRJNA224116	SAMN04881314	95.71	0	0	88.8384	1	53.9627	2092789	RS_GCF_001953175.1	p__Chloroflexota	c__Dehalococcoidia	o__Dehalococcoidales	f__Dehalococcoidaceae	g__Dehalogenimonas	s__Dehalogenimonas formicexedens
GCF_000143165.1	PRJNA224116	SAMN02598529	97.36	0	0	88.9678	1	55.0444	1686510	RS_GCF_000143165.1	p__Chloroflexota	c__Dehalococcoidia	o__Dehalococcoidales	f__Dehalococcoidaceae	g__Dehalogenimonas	s__Dehalogenimonas lykanthroporepellens
GCA_001005265.1	PRJNA269960	SAMN03565657	98.68	0	0	87.7772	1	49.187	1725728	GB_GCA_001005265.1	p__Chloroflexota	c__Dehalococcoidia	o__Dehalococcoidales	f__Dehalococcoidaceae	g__Dehalogenimonas	s__Dehalogenimonas sp001005265
GCF_002878295.2	PRJNA224116	SAMN02982882	94.39	0	0	87.8582	16	52.037	2023475	RS_GCF_002878295.2	p__Chloroflexota	c__Dehalococcoidia	o__Dehalococcoidales	f__Dehalococcoidaceae	g__Dehalogenimonas	s__Dehalogenimonas sp002878295
GCA_002382615.1	PRJNA348753	SAMN06451303	94.52	0.99	0	92.0285	31	48.23	962248	GB_GCA_002382615.1	p__Chloroflexota	c__Dehalococcoidia	o__Dehalococcoidales	f__Dehalococcoidaceae	g__UBA4087	s__UBA4087 sp002382615
GCA_903916765.1	PRJEB38681	SAMEA6956623	91.42	1.98	0	88.2077	149	45.7014	1366635	GB_GCA_903916765.1	p__Chloroflexota	c__Dehalococcoidia	o__Dehalococcoidales	f__Fen-1064	g__Fen-1064	s__Fen-1064 sp903916765
GCA_011170375.1	PRJNA605778	SAMN14094340	92.74	0.99	0	88.3628	17	51.7022	2277945	GB_GCA_011170375.1	p__Chloroflexota	c__Dehalococcoidia	o__Dehalococcoidales	f__Fen-1064	g__W589	s__W589 sp011170375
GCA_011171075.1	PRJNA605778	SAMN14094348	91.75	0	0	89.7305	53	52.617	2136110	GB_GCA_011171075.1	p__Chloroflexota	c__Dehalococcoidia	o__Dehalococcoidales	f__Fen-1064	g__W589	s__W589 sp011171075
GCA_003141235.1	PRJNA386568	SAMN08180156	93.62	2.97	0	87.9604	138	50.5253	2151312	GB_GCA_003141235.1	p__Chloroflexota	c__Dehalococcoidia	o__Dehalococcoidales	f__RBG-16-60-22	g__Fen-1077	s__Fen-1077 sp003141235
GCA_011192105.1	PRJNA605778	SAMN14094331	91.09	0	0	91.3344	12	56.8807	1805225	GB_GCA_002011495.1	p__Chloroflexota	c__Dehalococcoidia	o__Dehalococcoidales	f__RBG-16-60-22	g__JdFR-56	s__JdFR-56 sp002011495
GCA_903844845.1	PRJEB38681	SAMEA6952245	97.69	0.33	0	86.6801	29	52.4199	1910680	GB_GCA_903844845.1	p__Chloroflexota	c__Dehalococcoidia	o__Dehalococcoidales	f__UBA1222	g__SURF-27	s__SURF-27 sp903844845
GCA_009783135.1	PRJNA560329	SAMN12582041	92.74	1.32	50	88.4481	97	48.0954	1146923	GB_GCA_009783135.1	p__Chloroflexota	c__Dehalococcoidia	o__Dehalococcoidales	f__UBA1222	g__WRNG01	s__WRNG01 sp009783135
GCA_009776515.1	PRJNA560329	SAMN12582194	96.2	0.09	100	85.8898	99	53.0475	1344225	GB_GCA_009776515.1	p__Chloroflexota	c__Dehalococcoidia	o__Dehalococcoidales	f__UBA1222	g__WRNP01	s__WRNP01 sp009776515
GCA_011191975.1	PRJNA605778	SAMN14094345	91.91	1.98	0	87.0864	164	44.9655	3330833	GB_GCA_011191975.1	p__Chloroflexota	c__Dehalococcoidia	o__Dehalococcoidales	f__UBA2162	g__MGML01	s__MGML01 sp011191975
GCA_011328975.1	PRJNA480137	SAMN09639584	93.73	4.95	0	88.6285	212	45.9006	2470556	GB_GCA_011328975.1	p__Chloroflexota	c__Dehalococcoidia	o__Dehalococcoidales	f__UBA3254	g__UBA3254	s__UBA3254 sp011328975
GCA_011389395.1	PRJNA480137	SAMN09639874	96.2	3.96	25	88.5574	165	47.3488	2333385	GB_GCA_011389395.1	p__Chloroflexota	c__Dehalococcoidia	o__Dehalococcoidales	f__UBA3254	g__UBA3254	s__UBA3254 sp011389395
GCA_002419135.1	PRJNA348753	SAMN06451748	90.26	0	0	86.5978	56	43.9614	1308437	GB_GCA_002419135.1	p__Chloroflexota	c__Dehalococcoidia	o__Dehalococcoidales	f__UBA5627	g__UBA5627	s__UBA5627 sp002419135
GCA_012520835.1	PRJNA602310	SAMN13894084	97.69	3.36	66.67	86.5061	185	46.7092	1270954	GB_GCA_012520835.1	p__Chloroflexota	c__Dehalococcoidia	o__Dehalococcoidales	f__UBA5627	g__UBA5627	s__UBA5627 sp012520835
GCA_012719115.1	PRJNA602310	SAMN13893645	91.75	3.47	22.22	86.8444	268	44.3401	1251160	GB_GCA_012719115.1	p__Chloroflexota	c__Dehalococcoidia	o__Dehalococcoidales	f__UBA5627	g__UBA5627	s__UBA5627 sp012719115
GCA_011170285.1	PRJNA605778	SAMN14094323	90.76	0.99	0	86.2246	27	45.7896	1382721	GB_GCA_011170285.1	p__Chloroflexota	c__Dehalococcoidia	o__Dehalococcoidales	f__UBA5760	g__W498	s__W498 sp011170285
GCA_011057325.1	PRJNA480137	SAMN09639226	97.69	1.98	0	88.3107	33	70.2874	3944893	GB_GCA_011057325.1	p__Chloroflexota	c__Dehalococcoidia	o__DSGV01	f__DSGV01	g__DSGV01	s__DSGV01 sp011057325
GCA_003228685.1	PRJNA385762	SAMN09240169	94.47	3.96	50	90.1148	128	63.1447	3530347	GB_GCA_003228685.1	p__Chloroflexota	c__Dehalococcoidia	o__DSTF01	f__RBG-16-68-14	g__SZUA-185	s__SZUA-185 sp003228685
GCA_009377745.1	PRJNA494230	SAMN12830855	93.23	0.42	50	84.9957	80	63.7618	3534093	GB_GCA_009377745.1	p__Chloroflexota	c__Dehalococcoidia	o__DSTF01	f__WHTK01	g__WHTK01	s__WHTK01 sp009377745
GCA_004297765.1	PRJNA514088	SAMN10720205	96.2	1.19	0	86.0576	256	60.7473	5636236	GB_GCA_004297765.1	p__Chloroflexota	c__Dehalococcoidia	o__FW602-bin16	f__FW602-bin16	g__FW602-bin16	s__FW602-bin16 sp004297765
GCA_002717565.1	PRJNA391943	SAMN07618538	93.23	4.68	0	91.0488	32	46.8919	1683532	GB_GCA_002717565.1	p__Chloroflexota	c__Dehalococcoidia	o__GCA-2717565	f__GCA-2717565	g__GCA-2717565	s__GCA-2717565 sp002717565
GCA_011358865.1	PRJNA480137	SAMN09640055	92.24	0	0	90.9342	19	50.3899	1687010	GB_GCA_011358865.1	p__Chloroflexota	c__Dehalococcoidia	o__GIF9	f__AB-539-J10	g__DTMR01	s__DTMR01 sp011358865
GCA_003567995.1	PRJNA434545	SAMN08574833	95.21	1.98	100	88.1538	144	58.1635	1869433	GB_GCA_003556385.1	p__Chloroflexota	c__Dehalococcoidia	o__GIF9	f__AB-539-J10	g__E29-bin54	s__E29-bin54 sp003556385
GCA_004376695.1	PRJNA485648	SAMN11124390	90.76	0.99	0	88.5966	145	53.1549	1089115	GB_GCA_004376695.1	p__Chloroflexota	c__Dehalococcoidia	o__GIF9	f__AB-539-J10	g__E29-bin54	s__E29-bin54 sp004376695
GCA_013388845.1	PRJNA564648	SAMN14673733	91.25	1.98	50	88.4778	52	48.5857	1377641	GB_GCA_013388845.1	p__Chloroflexota	c__Dehalococcoidia	o__GIF9	f__AB-539-J10	g__JACAEN01	s__JACAEN01 sp013388845
GCA_001796515.1	PRJNA288027	SAMN04314098	92.24	0.2	100	86.5051	70	50.7749	1934179	GB_GCA_001796515.1	p__Chloroflexota	c__Dehalococcoidia	o__GIF9	f__AB-539-J10	g__RBG-13-51-36	s__RBG-13-51-36 sp001796515
GCA_903925085.1	PRJEB38681	SAMEA6956583	95.21	1.98	100	87.6262	60	47.7217	1512984	GB_GCA_903884455.1	p__Chloroflexota	c__Dehalococcoidia	o__GIF9	f__AB-539-J10	g__RBG-13-51-36	s__RBG-13-51-36 sp903884455
GCA_003552125.1	PRJNA434545	SAMN08575189	93.23	2.48	0	87.1617	175	57.6294	2090445	GB_GCA_003552125.1	p__Chloroflexota	c__Dehalococcoidia	o__GIF9	f__AB-539-J10	g__SKVJ01	s__SKVJ01 sp003552125
GCA_003562475.1	PRJNA434545	SAMN08574746	91.75	2.97	0	86.1442	133	58.0193	2457239	GB_GCA_003562475.1	p__Chloroflexota	c__Dehalococcoidia	o__GIF9	f__AB-539-J10	g__SKVJ01	s__SKVJ01 sp003562475
GCA_007120635.1	PRJNA453733	SAMN10606066	90.26	1.98	0	85.7166	72	56.3694	2082680	GB_GCA_007129495.1	p__Chloroflexota	c__Dehalococcoidia	o__GIF9	f__AB-539-J10	g__SKVJ01	s__SKVJ01 sp007129495
GCA_002452795.1	PRJNA348753	SAMN06451963	91.75	0	0	90.0769	75	49.4962	954862	GB_GCA_002452795.1	p__Chloroflexota	c__Dehalococcoidia	o__GIF9	f__AB-539-J10	g__UBA6803	s__UBA6803 sp002452795
GCA_011371865.1	PRJNA480137	SAMN09638901	91.88	0	0	91.4008	173	52.6354	1571774	GB_GCA_011371865.1	p__Chloroflexota	c__Dehalococcoidia	o__GIF9	f__UBA5620	g__SpSt-1004	s__SpSt-1004 sp011371865
GCA_903929005.1	PRJEB38681	SAMEA6954588	96.7	3.19	33.33	89.4109	296	52.5743	2603263	GB_GCA_903929005.1	p__Chloroflexota	c__Dehalococcoidia	o__GIF9	f__UBA5629	g__CAIMUM01	s__CAIMUM01 sp903929005
GCA_002311135.1	PRJNA348753	SAMN06454635	95.38	0.99	0	88.6902	70	50.8477	2227703	GB_GCA_002311135.1	p__Chloroflexota	c__Dehalococcoidia	o__GIF9	f__UBA5629	g__UBA1162	s__UBA1162 sp002311135
GCA_003142375.1	PRJNA386568	SAMN08180137	90.1	0	0	90.5777	30	51.3721	2137522	GB_GCA_003142375.1	p__Chloroflexota	c__Dehalococcoidia	o__GIF9	f__UBA5629	g__UBA1162	s__UBA1162 sp003142375
GCA_011170395.1	PRJNA605778	SAMN14094333	93.73	0.99	0	92.5241	12	59.9105	1790507	GB_GCA_002011475.1	p__Chloroflexota	c__Dehalococcoidia	o__JdFR-54	f__JdFR-54	g__JdFR-54	s__JdFR-54 sp002011475
GCA_902560345.1	PRJEB33281	SAMEA6075358	90.76	0	0	94.9975	23	30.8026	1307617	GB_GCA_002711005.1	p__Chloroflexota	c__Dehalococcoidia	o__SAR202	f__GCA-002694895	g__GCA-002694895	s__GCA-002694895 sp002711005
GCA_002721445.1	PRJNA391943	SAMN07618511	95.38	0.2	0	93.9443	18	30.4755	1712152	GB_GCA_002721445.1	p__Chloroflexota	c__Dehalococcoidia	o__SAR202	f__GCA-002723415	g__GCA-002723415	s__GCA-002723415 sp002721445
GCA_002719675.1	PRJNA391943	SAMN07618515	92.83	0	0	92.7601	19	32.6178	1403377	GB_GCA_002719675.1	p__Chloroflexota	c__Dehalococcoidia	o__SAR202	f__GCA-2719675	g__GCA-2719675	s__GCA-2719675 sp002719675
GCA_009392295.1	PRJNA547867	SAMN11979919	92.74	0	0	92.7939	25	32.0279	1447273	GB_GCA_009392295.1	p__Chloroflexota	c__Dehalococcoidia	o__SAR202	f__GCA-2719675	g__GCA-2719675	s__GCA-2719675 sp009392295
GCA_002722455.1	PRJNA391943	SAMN07618505	93.73	4.95	0	89.0762	30	30.9492	2484032	GB_GCA_002722455.1	p__Chloroflexota	c__Dehalococcoidia	o__SAR202	f__GCA-2722455	g__GCA-2722455	s__GCA-2722455 sp002722455
GCA_009392195.1	PRJNA547867	SAMN11979921	95.51	3.17	0	91.9906	67	35.8366	2053070	GB_GCA_009392195.1	p__Chloroflexota	c__Dehalococcoidia	o__SAR202	f__OSU-TB39	g__OSU-TB39	s__OSU-TB39 sp009392195
GCA_002238855.1	PRJNA326328	SAMN05959524	95.71	1.65	0	85.5732	213	57.1419	4606320	GB_GCA_002238855.1	p__Chloroflexota	c__Dehalococcoidia	o__SAR202	f__UBA11138	g__Bin90	s__Bin90 sp002238855
GCA_009840355.1	PRJNA555144	SAMN12598254	97.69	1.54	0	85.4629	64	57.9967	3278736	GB_GCA_009840355.1	p__Chloroflexota	c__Dehalococcoidia	o__SAR202	f__UBA11138	g__Bin90	s__Bin90 sp009840355
GCA_002313895.1	PRJNA348753	SAMN06451858	91.64	0.99	0	83.5601	404	55.7731	3395054	GB_GCA_002313895.1	p__Chloroflexota	c__Dehalococcoidia	o__SAR202	f__UBA11138	g__UBA1123	s__UBA1123 sp002313895
GCA_002328865.1	PRJNA348753	SAMN06450826	95.23	1.98	0	83.9874	306	61.0272	3859347	GB_GCA_002328865.1	p__Chloroflexota	c__Dehalococcoidia	o__SAR202	f__UBA11138	g__UBA2160	s__UBA2160 sp002328865
GCA_009838465.1	PRJNA555144	SAMN12598346	94.72	0.99	0	86.5901	90	58.329	3550737	GB_GCA_009838465.1	p__Chloroflexota	c__Dehalococcoidia	o__SAR202	f__UBA11138	g__VXRN01	s__VXRN01 sp009838465
GCA_002699485.1	PRJNA391943	SAMN07618452	90.43	1.49	0	93.6242	61	38.8106	1906463	GB_GCA_002699485.1	p__Chloroflexota	c__Dehalococcoidia	o__SAR202	f__UBA2962	g__UBA2962	s__UBA2962 sp002699485
GCA_009392275.1	PRJNA547867	SAMN11979918	91.97	0	0	93.1146	23	38.8543	1532285	GB_GCA_009392275.1	p__Chloroflexota	c__Dehalococcoidia	o__SAR202	f__UBA2962	g__UBA2962	s__UBA2962 sp002728115
GCA_002717465.1	PRJNA391943	SAMN07618526	90.56	2.18	66.67	92.5065	35	40.2308	1985284	GB_GCA_002717465.1	p__Chloroflexota	c__Dehalococcoidia	o__SAR202	f__UBA826	g__GCA-2717465	s__GCA-2717465 sp002717465
GCA_008373095.1	PRJNA504027	SAMN10392633	90.56	1.98	0	92.7781	104	41.9648	1951973	GB_GCA_008373095.1	p__Chloroflexota	c__Dehalococcoidia	o__SAR202	f__UBA826	g__UBA11996	s__UBA11996 sp002320875
GCA_002435305.1	PRJNA348753	SAMN06453191	90.26	0.99	0	88.3999	216	42.8486	1997934	GB_GCA_002435305.1	p__Chloroflexota	c__Dehalococcoidia	o__SAR202	f__UBA826	g__UBA11996	s__UBA11996 sp002435305
GCA_002728195.1	PRJNA391943	SAMN07618484	92.05	0.99	0	93.0009	110	41.5004	1716093	GB_GCA_002728195.1	p__Chloroflexota	c__Dehalococcoidia	o__SAR202	f__UBA826	g__UBA11996	s__UBA11996 sp002728195
GCA_002707945.1	PRJNA391943	SAMN07618496	92.57	1.19	20	94.3561	22	34.7844	1424643	GB_GCA_002718095.1	p__Chloroflexota	c__Dehalococcoidia	o__SAR202	f__UBA826	g__UBA826	s__UBA826 sp002718095
GCA_009838445.1	PRJNA555144	SAMN12598347	91.75	1.19	50	87.5363	370	60.9539	3306247	GB_GCA_009841605.1	p__Chloroflexota	c__Dehalococcoidia	o__SAR202	f__VXLM01	g__VXLM01	s__VXLM01 sp009841605
GCA_003228115.1	PRJNA471535	SAMN08332066	98.68	0	0	87.9135	18	58.4742	2777268	GB_GCA_003228115.1	p__Chloroflexota	c__Dehalococcoidia	o__SAR202-VII-2	f__SAR202-VII-2	g__SAR202-VII-2	s__SAR202-VII-2 sp003228115
GCA_009693015.1	PRJNA521725	SAMN10915717	92.74	0	0	87.4017	60	65.8303	1952790	GB_GCA_009693015.1	p__Chloroflexota	c__Dehalococcoidia	o__SHYB01	f__SHYB01	g__SHYB01	s__SHYB01 sp009693015
GCA_011373495.1	PRJNA480137	SAMN09638969	94.72	0	0	94.7375	130	59.6892	1590436	GB_GCA_011373495.1	p__Chloroflexota	c__Dehalococcoidia	o__SM23-28-2	f__HRbin24	g__DRWY01	s__DRWY01 sp011373495
GCA_002898715.1	PRJDB6348	SAMD00093774	93.73	3.96	33.33	92.3816	159	69.2602	2051769	GB_GCA_002898715.1	p__Chloroflexota	c__Dehalococcoidia	o__SM23-28-2	f__HRbin24	g__HRBIN24	s__HRBIN24 sp002898715
GCA_011047455.1	PRJNA480137	SAMN09639386	96.7	0	0	91.1677	31	70.8456	2283727	GB_GCA_011047455.1	p__Chloroflexota	c__Dehalococcoidia	o__SM23-28-2	f__HRbin24	g__HRBIN24	s__HRBIN24 sp011047455
GCA_011380505.1	PRJNA480137	SAMN09638994	92.24	0	0	92.9129	293	68.7748	1871096	GB_GCA_011380505.1	p__Chloroflexota	c__Dehalococcoidia	o__SM23-28-2	f__HRbin24	g__HRBIN24	s__HRBIN24 sp011380505
GCA_011054135.1	PRJNA480137	SAMN09639290	95.71	0.5	0	90.7296	31	68.9647	2485633	GB_GCA_002898615.1	p__Chloroflexota	c__Dehalococcoidia	o__SM23-28-2	f__HRbin24	g__HRBIN25	s__HRBIN25 sp002898615
GCA_005882985.1	PRJNA449266	SAMN11380393	92.08	0	0	88.8213	315	62.9373	2619356	GB_GCA_005882985.1	p__Chloroflexota	c__Dehalococcoidia	o__SM23-28-2	f__RBG-16-64-32	g__CF-163	s__CF-163 sp005882985
GCA_009377715.1	PRJNA494230	SAMN12830858	93.04	0.09	100	86.8264	129	56.963	2346458	GB_GCA_009377715.1	p__Chloroflexota	c__Dehalococcoidia	o__SM23-28-2	f__WHTN01	g__WHTN01	s__WHTN01 sp009377715
GCA_011047725.1	PRJNA480137	SAMN09639374	93.73	1.98	100	93.5154	99	66.8732	2752653	GB_GCA_011053995.1	p__Chloroflexota	c__Dehalococcoidia	o__SpSt-223	f__SpSt-223	g__SpSt-223	s__SpSt-223 sp011053995
GCA_013203045.1	PRJNA616293	SAMN14944593	96.7	1.98	0	86.8177	277	46.9164	3967808	GB_GCA_013203045.1	p__Chloroflexota	c__Dehalococcoidia	o__SZUA-161	f__SpSt-899	g__JABMQN01	s__JABMQN01 sp013203045
GCA_011358905.1	PRJNA480137	SAMN09640045	94.72	1.98	50	89.4621	72	59.1089	2363450	GB_GCA_011358905.1	p__Chloroflexota	c__Dehalococcoidia	o__SZUA-161	f__SpSt-899	g__SpSt-899	s__SpSt-899 sp011358905
GCA_011174795.1	PRJNA605778	SAMN14094343	91.25	0	0	91.2922	76	54.1134	1812091	GB_GCA_011174795.1	p__Chloroflexota	c__Dehalococcoidia	o__SZUA-161	f__SZUA-161	g__W281	s__W281 sp011174795
GCA_002239045.1	PRJNA326328	SAMN05959534	95.51	1.98	0	89.7523	21	56.3464	3017767	GB_GCA_002239045.1	p__Chloroflexota	c__Dehalococcoidia	o__UBA1151	f__Bin127	g__Bin127	s__Bin127 sp002239045
GCA_009846085.1	PRJNA555144	SAMN12598531	94.22	1.49	0	90.0203	202	56.2762	2518380	GB_GCA_009838175.1	p__Chloroflexota	c__Dehalococcoidia	o__UBA1151	f__Bin127	g__Bin127	s__Bin127 sp009838175
GCA_002712125.1	PRJNA391943	SAMN07618491	93.73	0.99	0	94.9647	34	31.3184	1355491	GB_GCA_002712125.1	p__Chloroflexota	c__Dehalococcoidia	o__UBA1151	f__Bin127	g__GCA-002708145	s__GCA-002708145 sp002712125
GCA_002714425.1	PRJNA391943	SAMN07618485	95.71	0.99	0	94.9211	18	31.5764	1395102	GB_GCA_002714425.1	p__Chloroflexota	c__Dehalococcoidia	o__UBA1151	f__Bin127	g__GCA-002708145	s__GCA-002708145 sp002714425
GCA_002728715.1	PRJNA391943	SAMN07618648	90.35	0	0	95.013	33	31.429	1348634	GB_GCA_002728715.1	p__Chloroflexota	c__Dehalococcoidia	o__UBA1151	f__Bin127	g__GCA-002708145	s__GCA-002708145 sp002728715
GCA_009391415.1	PRJNA547867	SAMN11979944	91.75	1.98	0	90.2507	121	46.4774	2275237	GB_GCA_009392785.1	p__Chloroflexota	c__Dehalococcoidia	o__UBA1151	f__Bin127	g__GCA-002725925	s__GCA-002725925 sp009392785
GCA_009392875.1	PRJNA547867	SAMN11979885	95.87	0.99	0	89.9771	99	44.8106	2173708	GB_GCA_002306745.1	p__Chloroflexota	c__Dehalococcoidia	o__UBA1151	f__Bin127	g__UBA1328	s__UBA1328 sp002306745
GCA_002306815.1	PRJNA348753	SAMN06453720	91.28	0	0	85.7612	118	51.576	2065707	GB_GCA_002306815.1	p__Chloroflexota	c__Dehalococcoidia	o__UBA1151	f__Bin127	g__UBA1328	s__UBA1328 sp002306815
GCA_012959765.1	PRJNA522654	SAMN10967665	98.68	0	0	86.7047	71	54.1129	2626509	GB_GCA_012959765.1	p__Chloroflexota	c__Dehalococcoidia	o__UBA1151	f__Bin127	g__UBA1328	s__UBA1328 sp012959765
GCA_013204545.1	PRJNA616293	SAMN14944515	96.7	3.08	50	87.5418	134	50.4598	2951305	GB_GCA_013204545.1	p__Chloroflexota	c__Dehalococcoidia	o__UBA1151	f__Bin127	g__UBA1328	s__UBA1328 sp013204545
GCA_009693115.1	PRJNA521725	SAMN10915712	96.7	0	0	85.4881	40	62.1261	2016578	GB_GCA_009693115.1	p__Chloroflexota	c__Dehalococcoidia	o__UBA1151	f__SHXW01	g__SHXW01	s__SHXW01 sp009693115
GCA_009391625.1	PRJNA547867	SAMN11979915	93.97	3.45	0	95.3562	66	30.7223	1258504	GB_GCA_002171675.1	p__Chloroflexota	c__Dehalococcoidia	o__UBA1151	f__TMED-70	g__TMED-70	s__TMED-70 sp002171675
GCA_002703265.1	PRJNA391943	SAMN07618442	91.88	4.51	88.89	94.9607	42	31.2032	1337577	GB_GCA_002703265.1	p__Chloroflexota	c__Dehalococcoidia	o__UBA1151	f__TMED-70	g__TMED-70	s__TMED-70 sp002703265
GCA_002730555.1	PRJNA391943	SAMN07618469	97.69	0	0	85.6285	41	61.3569	2568346	GB_GCA_002730555.1	p__Chloroflexota	c__Dehalococcoidia	o__UBA1151	f__UBA1151	g__GCA-2730555	s__GCA-2730555 sp002730555
GCA_013204555.1	PRJNA616293	SAMN14944516	96.7	0.11	100	88.6868	82	55.9693	3733397	GB_GCA_013204555.1	p__Chloroflexota	c__Dehalococcoidia	o__UBA1151	f__UBA1151	g__UBA1151	s__UBA1151 sp013204555
GCA_002347295.1	PRJNA348753	SAMN06452696	93.73	0	0	84.9249	75	42.5867	1520949	GB_GCA_002347295.1	p__Chloroflexota	c__Dehalococcoidia	o__UBA2247	f__UBA2247	g__UBA2247	s__UBA2247 sp002347295
GCA_003551705.1	PRJNA434545	SAMN08575219	92.41	0	0	88.0572	212	55.6268	2812446	GB_GCA_003551705.1	p__Chloroflexota	c__Dehalococcoidia	o__UBA2777	f__RBG-13-53-26	g__PUNJ01	s__PUNJ01 sp003551705
GCA_009838965.1	PRJNA555144	SAMN12598322	96.7	0.99	0	89.7012	138	65.9352	3013978	GB_GCA_009838965.1	p__Chloroflexota	c__Dehalococcoidia	o__UBA2963	f__UBA2963	g__Bin16	s__Bin16 sp009838965
GCA_009391465.1	PRJNA547867	SAMN11979943	98.68	0.44	0	94.1491	32	41.9512	1650912	GB_GCA_003215215.1	p__Chloroflexota	c__Dehalococcoidia	o__UBA2963	f__UBA2963	g__UBA2963	s__UBA2963 sp003215215
GCA_903917615.1	PRJEB38681	SAMEA6954296	91.25	4.63	33.33	89.9945	315	69.2879	2675076	GB_GCA_903917615.1	p__Chloroflexota	c__Dehalococcoidia	o__UBA2979	f__UBA2979	g__SHYQ01	s__SHYQ01 sp903917615
GCA_004297315.1	PRJNA514088	SAMN10720200	91.42	3.3	40	90.8189	323	69.1479	2508032	GB_GCA_004297315.1	p__Chloroflexota	c__Dehalococcoidia	o__UBA2979	f__UBA2979	g__SURF-43	s__SURF-43 sp004297315
GCA_002707835.1	PRJNA391943	SAMN07618497	93.37	0.99	0	93.97	23	38.5757	1642008	GB_GCA_002707835.1	p__Chloroflexota	c__Dehalococcoidia	o__UBA2979	f__UBA2979	g__UBA6955	s__UBA6955 sp002707835
GCA_009839925.1	PRJNA555144	SAMN12598273	91.58	0.11	100	91.0865	245	71.1098	2857508	GB_GCA_009839925.1	p__Chloroflexota	c__Dehalococcoidia	o__UBA2979	f__UBA2979	g__VXMT01	s__VXMT01 sp009839925
GCA_009840945.1	PRJNA555144	SAMN12598223	90.92	0	0	89.8931	157	71.0112	2530627	GB_GCA_009840945.1	p__Chloroflexota	c__Dehalococcoidia	o__UBA2979	f__UBA2979	g__VXMT01	s__VXMT01 sp009840945
GCA_009379925.1	PRJNA494230	SAMN12830839	91.25	0.99	0	88.9858	71	69.8151	3544553	GB_GCA_009379925.1	p__Chloroflexota	c__Dehalococcoidia	o__UBA2979	f__UBA2979	g__WHSU01	s__WHSU01 sp009379925
GCA_009391575.1	PRJNA547867	SAMN11979936	96.7	0	0	91.0721	16	41.6319	1439177	GB_GCA_002717805.1	p__Chloroflexota	c__Dehalococcoidia	o__UBA2985	f__UBA2985	g__UBA2985	s__UBA2985 sp002717805
GCA_009391535.1	PRJNA547867	SAMN11979938	90.26	0.99	0	92.0701	26	41.0836	1362308	GB_GCA_009391535.1	p__Chloroflexota	c__Dehalococcoidia	o__UBA2985	f__UBA2985	g__VFHP01	s__VFHP01 sp009391535
GCA_002898215.1	PRJDB6348	SAMD00093779	93.73	0	0	92.3524	4	69.2799	2343573	GB_GCA_002898215.1	p__Chloroflexota	c__Dehalococcoidia	o__UBA2991	f__UBA2991	g__HRBIN29	s__HRBIN29 sp002898215
GCA_011054735.1	PRJNA480137	SAMN09639397	93.73	0	0	93.0777	20	69.1284	2334067	GB_GCA_011048275.1	p__Chloroflexota	c__Dehalococcoidia	o__UBA2991	f__UBA2991	g__HRBIN29	s__HRBIN29 sp011048275
GCA_007118095.1	PRJNA453733	SAMN10606194	95.71	1.98	0	91.29	227	65.1916	3226155	GB_GCA_007118095.1	p__Chloroflexota	c__Dehalococcoidia	o__UBA2991	f__UBA2991	g__SLAK01	s__SLAK01 sp007118095
GCF_008838325.1	PRJNA224116	SAMN12500377	96.7	0.99	0	91.9328	1	69.8769	2746948	RS_GCF_008838325.1	p__Chloroflexota	c__Dehalococcoidia	o__UBA2991	f__UBA2991	g__Tepidiforma	s__Tepidiforma bonchosmolovskayae
GCF_002563855.1	PRJNA224116	SAMN05216314	96.7	0.99	0	91.522	1	69.3708	2743337	RS_GCF_002563855.1	p__Chloroflexota	c__Dehalococcoidia	o__UBA2991	f__UBA2991	g__Tepidiforma	s__Tepidiforma sp002563855
GCA_002346645.1	PRJNA348753	SAMN06456351	91.25	0.99	0	91.8979	60	54.9806	1873976	GB_GCA_002346645.1	p__Chloroflexota	c__Dehalococcoidia	o__UBA2991	f__UBA2991	g__UBA2991	s__UBA2991 sp002346645
GCA_009839725.1	PRJNA555144	SAMN12598286	94.72	0	0	91.9146	169	68.8902	2834774	GB_GCA_009839725.1	p__Chloroflexota	c__Dehalococcoidia	o__UBA2991	f__UBA2991	g__UBA2991	s__UBA2991 sp009839725
GCA_009841435.1	PRJNA555144	SAMN12598199	95.31	0.99	0	92.4009	138	68.5775	2708205	GB_GCA_009841435.1	p__Chloroflexota	c__Dehalococcoidia	o__UBA2991	f__UBA2991	g__UBA2991	s__UBA2991 sp009841435
GCA_009392805.1	PRJNA547867	SAMN11979886	95.62	0.2	0	94.3226	9	40.0764	1646789	GB_GCA_002723125.1	p__Chloroflexota	c__Dehalococcoidia	o__UBA3495	f__UBA2588	g__UBA2588	s__UBA2588 sp002723125
GCA_003523055.1	PRJNA417962	SAMN08019790	94.96	0.2	0	90.8125	114	37.4212	1790256	GB_GCA_003523055.1	p__Chloroflexota	c__Dehalococcoidia	o__UBA3495	f__UBA2588	g__UBA2588	s__UBA2588 sp003523055
GCA_002238505.1	PRJNA326328	SAMN05959503	97.69	1.98	0	82.9116	58	59.203	4393250	GB_GCA_002238505.1	p__Chloroflexota	c__Dehalococcoidia	o__UBA3495	f__UBA3495	g__Bin22	s__Bin22 sp002238505
GCA_009840135.1	PRJNA555144	SAMN12598262	95.87	0.99	0	82.8975	237	59.2333	3454762	GB_GCA_009840135.1	p__Chloroflexota	c__Dehalococcoidia	o__UBA3495	f__UBA3495	g__Bin22	s__Bin22 sp009840135
GCA_002238825.1	PRJNA326328	SAMN05959523	96.59	0	0	84.9523	67	62.7907	4958136	GB_GCA_002238825.1	p__Chloroflexota	c__Dehalococcoidia	o__UBA3495	f__UBA3495	g__Bin87	s__Bin87 sp002238825
GCA_009841575.1	PRJNA555144	SAMN12598191	95.6	0	0	90.2078	77	62.8964	3229454	GB_GCA_009837355.1	p__Chloroflexota	c__Dehalococcoidia	o__UBA3495	f__UBA3495	g__Bin87	s__Bin87 sp009837355
GCA_009840165.1	PRJNA555144	SAMN12598261	94.72	0	0	88.6212	143	61.3465	3757816	GB_GCA_009840165.1	p__Chloroflexota	c__Dehalococcoidia	o__UBA3495	f__UBA3495	g__Bin87	s__Bin87 sp009840165
GCA_009692925.1	PRJNA521725	SAMN10915722	92.74	0	0	84.914	101	64.2888	2065070	GB_GCA_009692925.1	p__Chloroflexota	c__Dehalococcoidia	o__UBA3495	f__UBA3495	g__SHYG01	s__SHYG01 sp009692925
GCA_002311385.1	PRJNA348753	SAMN06452090	95.84	1.98	0	81.2851	445	54.7372	3766836	GB_GCA_002311385.1	p__Chloroflexota	c__Dehalococcoidia	o__UBA3495	f__UBA3495	g__UBA1141	s__UBA1141 sp002311385
GCA_002710215.1	PRJNA391943	SAMN07618500	92.54	2.97	25	85.6801	76	57.7488	3074704	GB_GCA_002710215.1	p__Chloroflexota	c__Dehalococcoidia	o__UBA3495	f__UBA3495	g__UBA11650	s__UBA11650 sp002710215
GCA_009391395.1	PRJNA547867	SAMN11979946	97.03	0.5	0	85.6147	82	58.6395	3121826	GB_GCA_002328185.1	p__Chloroflexota	c__Dehalococcoidia	o__UBA3495	f__UBA3495	g__UBA9611	s__UBA9611 sp002328185
GCA_009392435.1	PRJNA547867	SAMN11979907	92.65	4.95	0	87.2736	148	58.9	2651326	GB_GCA_002698265.1	p__Chloroflexota	c__Dehalococcoidia	o__UBA3495	f__UBA3495	g__UBA9611	s__UBA9611 sp002698265
GCA_009391495.1	PRJNA547867	SAMN11979940	92.65	1.19	0	89.0244	190	60.9869	2629155	GB_GCA_002721995.1	p__Chloroflexota	c__Dehalococcoidia	o__UBA3495	f__UBA3495	g__UBA9611	s__UBA9611 sp002721995
GCA_003973495.1	PRJNA454888	SAMN09407824	92.24	1.98	50	86.2014	118	58.9399	3372972	GB_GCA_002746355.1	p__Chloroflexota	c__Dehalococcoidia	o__UBA3495	f__UBA3495	g__UBA9611	s__UBA9611 sp002746355
GCA_009392575.1	PRJNA547867	SAMN11979900	91.48	1.49	100	87.176	305	57.2495	2602142	GB_GCA_002816355.1	p__Chloroflexota	c__Dehalococcoidia	o__UBA3495	f__UBA3495	g__UBA9611	s__UBA9611 sp002816355
GCA_012959605.1	PRJNA522654	SAMN10967671	95.71	0	0	85.5759	188	54.7244	2812808	GB_GCA_012959605.1	p__Chloroflexota	c__Dehalococcoidia	o__UBA3495	f__UBA3495	g__UBA9611	s__UBA9611 sp012959605
GCA_013204585.1	PRJNA616293	SAMN14944513	94.72	2.38	0	86.9393	76	55.7602	3127064	GB_GCA_013204585.1	p__Chloroflexota	c__Dehalococcoidia	o__UBA3495	f__UBA3495	g__UBA9611	s__UBA9611 sp013204585
GCA_009840175.1	PRJNA555144	SAMN12598263	97.69	0.99	100	85.7168	306	61.761	4312190	GB_GCA_009840175.1	p__Chloroflexota	c__Dehalococcoidia	o__UBA3495	f__UBA3495	g__VXOI01	s__VXOI01 sp009840175
GCA_002450835.1	PRJNA348753	SAMN06450478	94.39	0.99	0	91.0667	50	40.7977	1250736	GB_GCA_002450835.1	p__Chloroflexota	c__Dehalococcoidia	o__UBA6926	f__UBA6926	g__UBA6926	s__UBA6926 sp002450835
GCA_009841045.1	PRJNA555144	SAMN12598217	93.73	0	0	91.0293	71	60.4873	1952380	GB_GCA_009841045.1	p__Chloroflexota	c__Dehalococcoidia	o__UBA6926	f__UBA6926	g__VXMO01	s__VXMO01 sp009841045
GCA_009392005.1	PRJNA547867	SAMN11979934	94.88	0	0	89.8121	13	44.8194	1600497	GB_GCA_009392005.1	p__Chloroflexota	c__Dehalococcoidia	o__UBA6926	f__VFHL01	g__VFHL01	s__VFHL01 sp009392005
GCA_003228195.2	PRJNA471535	SAMN09211444	97.19	1.98	0	91.4998	28	45.9022	1522803	GB_GCA_003228195.2	p__Chloroflexota	c__Dehalococcoidia	o__UBA6952	f__QGNO01	g__QGNO01	s__QGNO01 sp003228195
GCA_009392515.1	PRJNA547867	SAMN11979901	97.69	0	0	94.1936	62	33.8212	1551723	GB_GCA_009392515.1	p__Chloroflexota	c__Dehalococcoidia	o__UBA6952	f__UBA6952	g__UBA6952	s__UBA6952 sp009392515
GCA_009377665.1	PRJNA494230	SAMN12830859	90.48	3.96	0	89.4576	332	65.5792	2957121	GB_GCA_009377665.1	p__Chloroflexota	c__Dehalococcoidia	o__WHTO01	f__WHTO01	g__WHTO01	s__WHTO01 sp009377665
GCA_903822495.1	PRJEB38681	SAMEA6956843	91.28	0.92	0	91.2672	68	71.6477	3610320	GB_GCA_903822495.1	p__Chloroflexota	c__Ellin6529	o__CSP1-4	f__CSP1-4	g__CAIJPD01	s__CAIJPD01 sp903822495
GCA_903833645.1	PRJEB38681	SAMEA6948783	91.94	3.24	40	91.0858	398	68.7235	3618509	GB_GCA_903925955.1	p__Chloroflexota	c__Ellin6529	o__CSP1-4	f__CSP1-4	g__CAIXZV01	s__CAIXZV01 sp903925955
GCA_903859655.1	PRJEB38681	SAMEA6946671	93.98	4.63	80	90.9866	736	71.7851	3912080	GB_GCA_903930745.1	p__Chloroflexota	c__Ellin6529	o__CSP1-4	f__CSP1-4	g__CAIXZV01	s__CAIXZV01 sp903930745
GCA_903928275.1	PRJEB38681	SAMEA6953803	93.2	2.78	0	89.7361	476	72.6346	3460975	GB_GCA_903928275.1	p__Chloroflexota	c__Ellin6529	o__CSP1-4	f__CSP1-4	g__CAIYQJ01	s__CAIYQJ01 sp903928275
GCA_005883615.1	PRJNA449266	SAMN11380386	95.83	0.93	0	91.2081	119	68.0235	3061135	GB_GCA_005883615.1	p__Chloroflexota	c__Ellin6529	o__CSP1-4	f__CSP1-4	g__CF-16	s__CF-16 sp005883615
GCA_005882635.1	PRJNA449266	SAMN11380416	94.91	2.78	66.67	91.1489	232	70.8253	3176242	GB_GCA_005882635.1	p__Chloroflexota	c__Ellin6529	o__CSP1-4	f__CSP1-4	g__CF-46	s__CF-46 sp005882635
GCA_013698095.1	PRJNA630822	SAMN15052013	96.09	2.78	0	89.9271	261	69.4666	3913453	GB_GCA_013698095.1	p__Chloroflexota	c__Ellin6529	o__CSP1-4	f__CSP1-4	g__CF-46	s__CF-46 sp013698095
GCA_001443375.1	PRJNA262935	SAMN03462093	90.28	2.31	0	91.9243	71	71.8484	2585469	GB_GCA_001443375.1	p__Chloroflexota	c__Ellin6529	o__CSP1-4	f__CSP1-4	g__CSP1-4	s__CSP1-4 sp001443375
GCA_003141245.1	PRJNA386568	SAMN08180163	93.78	2.78	0	88.4354	56	68.2603	2542101	GB_GCA_003141245.1	p__Chloroflexota	c__Ellin6529	o__CSP1-4	f__CSP1-4	g__Fen-1039	s__Fen-1039 sp003141245
GCA_003141455.1	PRJNA386568	SAMN08180141	94.8	1.39	0	88.5061	77	67.6763	3069137	GB_GCA_003141455.1	p__Chloroflexota	c__Ellin6529	o__CSP1-4	f__CSP1-4	g__Fen-1039	s__Fen-1039 sp003141455
GCA_003141955.1	PRJNA386568	SAMN08180086	94.8	2.78	66.67	87.5178	135	68.7166	2800466	GB_GCA_003141955.1	p__Chloroflexota	c__Ellin6529	o__CSP1-4	f__CSP1-4	g__Fen-1039	s__Fen-1039 sp003141955
GCA_003158295.1	PRJNA386568	SAMN08179603	91.52	2.78	0	88.7792	113	67.8906	2718830	GB_GCA_003158295.1	p__Chloroflexota	c__Ellin6529	o__CSP1-4	f__CSP1-4	g__Fen-1039	s__Fen-1039 sp003158295
GCA_003158675.1	PRJNA386568	SAMN08179552	91.03	0.93	0	89.165	122	67.2167	2778618	GB_GCA_003158675.1	p__Chloroflexota	c__Ellin6529	o__CSP1-4	f__CSP1-4	g__Fen-1039	s__Fen-1039 sp003158675
GCA_003165505.1	PRJNA386568	SAMN08179028	91.05	2.16	33.33	86.9637	277	68.0253	2355413	GB_GCA_003165675.1	p__Chloroflexota	c__Ellin6529	o__CSP1-4	f__CSP1-4	g__Fen-1039	s__Fen-1039 sp003165675
GCA_003171065.1	PRJNA386568	SAMN08179029	94.28	0.93	0	87.0087	169	68.3545	3023465	GB_GCA_003171065.1	p__Chloroflexota	c__Ellin6529	o__CSP1-4	f__CSP1-4	g__Fen-1039	s__Fen-1039 sp003171065
GCA_003169735.1	PRJNA386568	SAMN08179108	95.06	2.78	0	91.318	134	68.6158	3062812	GB_GCA_003169735.1	p__Chloroflexota	c__Ellin6529	o__CSP1-4	f__CSP1-4	g__Palsa-1032	s__Palsa-1032 sp003169735
GCA_003152165.1	PRJNA386568	SAMN08179844	92.35	1.39	0	87.5881	187	68.2876	3603921	GB_GCA_003152165.1	p__Chloroflexota	c__Ellin6529	o__CSP1-4	f__CSP1-4	g__Palsa-1033	s__Palsa-1033 sp003152165
GCA_005889475.1	PRJNA449266	SAMN11380455	92.59	1.85	0	91.642	182	70.4491	2644230	GB_GCA_005889475.1	p__Chloroflexota	c__Ellin6529	o__CSP1-4	f__CSP1-4	g__UBA5189	s__UBA5189 sp005889475
GCA_012026785.1	PRJNA520935	SAMN10872752	92.87	2.78	0	90.8772	260	70.657	3774659	GB_GCA_012026785.1	p__Chloroflexota	c__Ellin6529	o__CSP1-4	f__CSP1-4	g__UBA5189	s__UBA5189 sp012026785
GCA_005881435.1	PRJNA449266	SAMN11380477	94.29	0.93	0	93.2685	181	67.6253	2892216	GB_GCA_005881435.1	p__Chloroflexota	c__Ellin6529	o__P2-11E	f__CF-107	g__CF-107	s__CF-107 sp005881435
GCA_005883625.1	PRJNA449266	SAMN11380378	97.03	0.44	33.33	92.8888	136	70.3556	3186397	GB_GCA_001919195.1	p__Chloroflexota	c__Ellin6529	o__P2-11E	f__P2-11E	g__3-1-20CM-2-70-9	s__3-1-20CM-2-70-9 sp001919195
GCA_005881885.1	PRJNA449266	SAMN11380381	96.04	2.48	66.67	92.7704	240	67.4168	3356916	GB_GCA_005881885.1	p__Chloroflexota	c__Ellin6529	o__P2-11E	f__P2-11E	g__3-1-20CM-2-70-9	s__3-1-20CM-2-70-9 sp005881885
GCA_005883505.1	PRJNA449266	SAMN11380439	90.06	1.32	33.33	93.8056	345	66.9054	2922913	GB_GCA_005882765.1	p__Chloroflexota	c__Ellin6529	o__P2-11E	f__P2-11E	g__3-1-20CM-2-70-9	s__3-1-20CM-2-70-9 sp005882765
GCA_005881735.1	PRJNA449266	SAMN11380371	97.03	2.48	33.33	93.5223	160	67.5436	3020215	GB_GCA_005889075.1	p__Chloroflexota	c__Ellin6529	o__P2-11E	f__P2-11E	g__3-1-20CM-2-70-9	s__3-1-20CM-2-70-9 sp005889075
GCA_005889295.1	PRJNA449266	SAMN11380408	93.11	2.22	50	93.5925	349	66.8799	3234079	GB_GCA_005889295.1	p__Chloroflexota	c__Ellin6529	o__P2-11E	f__P2-11E	g__3-1-20CM-2-70-9	s__3-1-20CM-2-70-9 sp005889295
GCA_005879625.1	PRJNA449266	SAMN11380539	93.18	1.1	0	93.5513	274	68.0089	3102530	GB_GCA_005887995.1	p__Chloroflexota	c__Ellin6529	o__P2-11E	f__P2-11E	g__CF-39	s__CF-39 sp005887995
GCA_005889405.1	PRJNA449266	SAMN11380434	96.04	1.49	100	94.1117	116	67.8837	3048322	GB_GCA_005889405.1	p__Chloroflexota	c__Ellin6529	o__P2-11E	f__P2-11E	g__CF-39	s__CF-39 sp005889405
GCA_002405245.1	PRJNA348753	SAMN06454636	93.6	2.97	25	87.8459	359	68.5648	3574365	GB_GCA_002404155.1	p__Chloroflexota	c__Ellin6529	o__P2-11E	f__P2-11E	g__UBA4735	s__UBA4735 sp002404155
GCA_013816405.1	PRJNA630822	SAMN15052250	94.44	0	0	90.8342	110	67.9544	2501464	GB_GCA_013816405.1	p__Chloroflexota	c__Ellin6529	o__QHBO01	f__QHBO01	g__CF-167	s__CF-167 sp013816405
GCA_013697395.1	PRJNA630822	SAMN15052047	91.2	3.33	0	88.9323	564	68.9953	3417571	GB_GCA_013697395.1	p__Chloroflexota	c__Ellin6529	o__QHBO01	f__QHBO01	g__JACDBZ01	s__JACDBZ01 sp013697395
GCA_003243965.1	PRJNA471400	SAMN09209450	91.67	0.46	0	90.8685	49	69.6245	2218727	GB_GCA_003243965.1	p__Chloroflexota	c__Ellin6529	o__QHBO01	f__QHBO01	g__QHBO01	s__QHBO01 sp003243965
GCF_902810745.1	PRJNA224116	SAMEA6606210	98.35	4.82	0	86.9488	293	64.3262	5588222	RS_GCF_902810745.1	p__Chloroflexota	c__FW602-bin22	o__FW602-bin22	f__CADDYW01	g__CADDYW01	s__CADDYW01 sp902810745
GCA_011051445.1	PRJNA480137	SAMN09639319	95.71	0.99	0	89.9858	202	69.8903	3353864	GB_GCA_011051445.1	p__Chloroflexota	c__FW602-bin22	o__FW602-bin22	f__DSKJ01	g__DSKJ01	s__DSKJ01 sp011051445
GCA_004297775.1	PRJNA514088	SAMN10720210	98.68	0.99	0	92.2261	38	65.3123	4026661	GB_GCA_004297775.1	p__Chloroflexota	c__FW602-bin22	o__FW602-bin22	f__FW602-bin22	g__FW602-bin22	s__FW602-bin22 sp004297775
GCF_902812455.1	PRJNA224116	SAMEA6606256	93.23	3.96	0	87.3034	247	54.8444	5343607	RS_GCF_902812455.1	p__Chloroflexota	c__Ktedonobacteria	o__Ktedonobacterales	f__Ktedonobacteraceae	g__CADDZH01	s__CADDZH01 sp902812455
GCA_005879655.1	PRJNA449266	SAMN11380524	92.65	3.96	0	83.5086	715	49.7555	5889597	GB_GCA_005879655.1	p__Chloroflexota	c__Ktedonobacteria	o__Ktedonobacterales	f__Ktedonobacteraceae	g__CF-154	s__CF-154 sp005879655
GCF_008326305.1	PRJNA224116	SAMD00159390	98.68	4.16	0	82.1082	268	49.6526	7209578	RS_GCF_008326305.1	p__Chloroflexota	c__Ktedonobacteria	o__Ktedonobacterales	f__Ktedonobacteraceae	g__Dictyobacter	s__Dictyobacter sp008326305
GCA_011389075.1	PRJNA480137	SAMN09640079	97.29	3.96	0	87.1172	594	54.0585	5554242	GB_GCA_011389075.1	p__Chloroflexota	c__Ktedonobacteria	o__Ktedonobacterales	f__Ktedonobacteraceae	g__DTNP01	s__DTNP01 sp011389075
GCF_003967535.1	PRJNA224116	SAMD00152513	98.68	4.98	0	83.7975	2	49.3601	7699857	RS_GCF_003967535.1	p__Chloroflexota	c__Ktedonobacteria	o__Ktedonobacterales	f__Ktedonobacteraceae	g__Tengunoibacter	s__Tengunoibacter tsumagoiensis
GCF_008974285.1	PRJNA224116	SAMD00184569	98.18	1.98	0	81.7815	28	60.7432	5603770	RS_GCF_008974285.1	p__Chloroflexota	c__Ktedonobacteria	o__Ktedonobacterales	f__Ktedonobacteraceae	g__Thermogemmatispora	s__Thermogemmatispora aurantia
GCF_000702505.1	PRJNA224116	SAMN02841144	98.18	2.31	0	82.5391	1	60.8821	5607959	RS_GCF_000702505.1	p__Chloroflexota	c__Ktedonobacteria	o__Ktedonobacterales	f__Ktedonobacteraceae	g__Thermogemmatispora	s__Thermogemmatispora carboxidivorans
GCF_001748285.1	PRJNA224116	SAMD00057755	98.18	1.98	0	82.5558	112	61.1391	5556502	RS_GCF_001748285.1	p__Chloroflexota	c__Ktedonobacteria	o__Ktedonobacterales	f__Ktedonobacteraceae	g__Thermogemmatispora	s__Thermogemmatispora onikobensis
GCF_003268475.1	PRJNA224116	SAMN04600100	98.18	2.97	0	80.5026	61	60.833	5973949	RS_GCF_003268475.1	p__Chloroflexota	c__Ktedonobacteria	o__Ktedonobacterales	f__Ktedonobacteraceae	g__Thermogemmatispora	s__Thermogemmatispora tikiterensis
GCA_005881495.1	PRJNA449266	SAMN11380470	95.71	3.96	0	85.1583	507	53.2941	6583670	GB_GCA_005881495.1	p__Chloroflexota	c__Ktedonobacteria	o__Ktedonobacterales	f__Ktedonobacteraceae	g__UBA11361	s__UBA11361 sp005881495
GCA_009840625.1	PRJNA555144	SAMN12598238	93.21	0	0	90.3787	28	64.8398	2268803	GB_GCA_009840625.1	p__Chloroflexota	c__UBA11872	o__UBA11872	f__VXNJ01	g__VXNJ01	s__VXNJ01 sp009840625
GCA_012270555.1	PRJNA545004	SAMN12097957	93.73	0.99	0	84.0692	66	59.9311	3181364	GB_GCA_012270555.1	p__Chloroflexota	c__UBA11872	o__VXOZ01	f__VXOZ01	g__VXOZ01	s__VXOZ01 sp012270555
GCA_011055185.1	PRJNA480137	SAMN09639219	98.02	0	0	86.8344	28	64.9835	4886618	GB_GCA_011053965.1	p__Chloroflexota	c__UBA2235	o__SpSt-225	f__SpSt-225	g__SpSt-225	s__SpSt-225 sp011053965
GCA_903836285.1	PRJEB38681	SAMEA6945624	94.16	2.42	25	89.7604	619	66.7527	3661841	GB_GCA_903836285.1	p__Chloroflexota	c__UBA2235	o__UBA12225	f__UBA12225	g__CAILQO01	s__CAILQO01 sp903836285
GCA_003670395.1	PRJNA449258	SAMN09724417	92.41	1.98	0	89.251	201	61.7869	3310851	GB_GCA_002347925.1	p__Chloroflexota	c__UBA2235	o__UBA12225	f__UBA12225	g__UBA12225	s__UBA12225 sp002347925
GCA_002404055.1	PRJNA348753	SAMN06451262	92.96	3.96	0	85.4693	893	64.9506	7555351	GB_GCA_002404055.1	p__Chloroflexota	c__UBA4733	o__UBA4733	f__UBA4733	g__UBA4733	s__UBA4733 sp002404055
GCA_005883405.1	PRJNA449266	SAMN11380442	95.54	2.97	0	89.4302	826	66.1025	6165587	GB_GCA_005883405.1	p__Chloroflexota	c__UBA6077	o__UBA6077	f__CF-72	g__CF-72	s__CF-72 sp005883405
GCA_009377635.1	PRJNA494230	SAMN12830862	91.21	1.98	50	87.4538	413	65.5309	3517004	GB_GCA_009377635.1	p__Chloroflexota	c__UBA6077	o__UBA6077	f__SHYK01	g__WHTR01	s__WHTR01 sp009377635
GCA_002436065.1	PRJNA348753	SAMN06455613	98.68	2.18	0	87.1681	128	62.2124	5908186	GB_GCA_002436065.1	p__Chloroflexota	c__UBA6077	o__UBA6077	f__UBA6077	g__UBA6077	s__UBA6077 sp002436065

## Sheet: Table S2.
Supplementary Table S2. Genome information for GTDB representative genomes of the Dehalococcoidia, along with biome information associated with each genome
Accession	Source	NCBI BioProject	NCBI BioSample	CheckM Completeness	CheckM Contamination	Coding Density	Contig Count	GC%	Genome Size	GTDB Representative	GTDB Phylum	GTDB Class	GTDB Order	GTDB Family	GTDB Genus	GTDB Species
GCF_000199675.1	Waste water	PRJNA224116	SAMD00061114	93.64	4.73	92.36	1	53.85	3532378	RS_GCF_000199675.1	p__Chloroflexota	c__Anaerolineae	o__Anaerolineales	f__Anaerolineaceae	g__Anaerolinea	s__Anaerolinea thermophila
GCF_001306175.1	Hydrothermal field	PRJNA224116	SAMN03274860	98.18	4.55	92.69	12	59.56	3559695	RS_GCF_001306175.1	p__Chloroflexota	c__Anaerolineae	o__Ardenticatenales	f__Ardenticatenaceae	g__Ardenticatena	s__Ardenticatena maritima
GCF_000281175.1	Hot spring	PRJNA224116	SAMD00061033	100	1.82	89.56	1	58.77	5144873	RS_GCF_000281175.1	p__Chloroflexota	c__Anaerolineae	o__Caldilineales	f__Caldilineaceae	g__Caldilinea	s__Caldilinea aerophila
GCF_900187885.1	Hot spring	PRJNA224116	SAMN02746019	97.27	0.91	89.37	87	67.35	3216964	RS_GCF_900187885.1	p__Chloroflexota	c__Anaerolineae	o__Thermoflexales	f__Thermoflexaceae	g__Thermoflexus	s__Thermoflexus hugenholtzii
GCF_000018865.1	Hot spring	PRJNA224116	SAMN02598539	99.69	0	83.73	1	56.7	5258541	RS_GCF_000018865.1	p__Chloroflexota	c__Chloroflexia	o__Chloroflexales	f__Chloroflexaceae	g__Chloroflexus	s__Chloroflexus aurantiacus
GCF_000025005.1	Thermal soil	PRJNA224116	SAMN00017581	98.58	0	91.6	2	53.51	3101581	RS_GCF_000025005.1	p__Chloroflexota	c__Chloroflexia	o__Thermobaculales	f__Thermobaculaceae	g__Thermobaculum	s__Thermobaculum terrenum
GCF_000021685.1	Hot spring	PRJNA224116	SAMN02603430	98.13	0	88.55	2	64.28	2920744	RS_GCF_000021685.1	p__Chloroflexota	c__Chloroflexia	o__Thermomicrobiales	f__Thermomicrobiaceae	g__Thermomicrobium	s__Thermomicrobium roseum
GCA_009838735.1	Marine	PRJNA555144	SAMN12598332	93.73	0.99	91.15	68	64.14	3149415	GB_GCA_009838735.1	p__Chloroflexota	c__Dehalococcoidia	o__Bin125	f__Bin125	g__Bin125	s__Bin125 sp009838735
GCA_009838915.1	Sponge	PRJNA555144	SAMN12598326	93.73	0.99	91.56	50	65.45	2865058	GB_GCA_009838915.1	p__Chloroflexota	c__Dehalococcoidia	o__Bin125	f__Bin125	g__Bin125	s__Bin125 sp009838915
GCA_002239025.1	Sponge	PRJNA326328	SAMN05959533	94.72	0.99	88.62	66	62.27	3681665	GB_GCA_002239025.1	p__Chloroflexota	c__Dehalococcoidia	o__Bin125	f__Bin125	g__Bin125	s__Bin125 sp002239025
GCA_003552785.1	Hypersaline soda lake	PRJNA434545	SAMN08575186	92.08	2.56	88.68	126	46.47	1422391	GB_GCA_003552785.1	p__Chloroflexota	c__Dehalococcoidia	o__Dehalococcoidales	f__CSSed11-197	g__CSSed11-197	s__CSSed11-197 sp003552785
GCF_000830885.1	Electronic waste sediment	PRJNA224116	SAMN02444489	99.01	0	90.05	1	47.22	1362151	RS_GCF_000830885.1	p__Chloroflexota	c__Dehalococcoidia	o__Dehalococcoidales	f__Dehalococcoidaceae	g__Dehalococcoides	s__Dehalococcoides mccartyi_B
GCF_000011905.1	Digester sludge	PRJNA224116	SAMN02603990	99.01	0	90.6	1	48.85	1469720	RS_GCF_000011905.1	p__Chloroflexota	c__Dehalococcoidia	o__Dehalococcoidales	f__Dehalococcoidaceae	g__Dehalococcoides	s__Dehalococcoides mccartyi
GCF_001889305.1	Electronic waste sediment	PRJNA224116	SAMN03771551	99.01	0	90.19	1	46.91	1521287	RS_GCF_001889305.1	p__Chloroflexota	c__Dehalococcoidia	o__Dehalococcoidales	f__Dehalococcoidaceae	g__Dehalococcoides	s__Dehalococcoides mccartyi_A
GCF_000143165.1	Contaminated groundwater	PRJNA224116	SAMN02598529	97.36	0	88.97	1	55.04	1686510	RS_GCF_000143165.1	p__Chloroflexota	c__Dehalococcoidia	o__Dehalococcoidales	f__Dehalococcoidaceae	g__Dehalogenimonas	s__Dehalogenimonas lykanthroporepellens
GCF_001953175.1	Contaminated groundwater	PRJNA224116	SAMN04881314	95.71	0	88.84	1	53.96	2092789	RS_GCF_001953175.1	p__Chloroflexota	c__Dehalococcoidia	o__Dehalococcoidales	f__Dehalococcoidaceae	g__Dehalogenimonas	s__Dehalogenimonas formicexedens
GCA_001005265.1	Bioreactor	PRJNA269960	SAMN03565657	98.68	0	87.78	1	49.19	1725728	GB_GCA_001005265.1	p__Chloroflexota	c__Dehalococcoidia	o__Dehalococcoidales	f__Dehalococcoidaceae	g__Dehalogenimonas	s__Dehalogenimonas sp001005265
GCF_002878295.2	Soil	PRJNA224116	SAMN02982882	94.39	0	87.86	16	52.04	2023475	RS_GCF_002878295.2	p__Chloroflexota	c__Dehalococcoidia	o__Dehalococcoidales	f__Dehalococcoidaceae	g__Dehalogenimonas	s__Dehalogenimonas sp002878295
GCF_001466665.1	Contaminated groundwater	PRJNA224116	SAMN03068710	95.21	0	89.65	2	55.88	1851576	RS_GCF_001466665.1	p__Chloroflexota	c__Dehalococcoidia	o__Dehalococcoidales	f__Dehalococcoidaceae	g__Dehalogenimonas	s__Dehalogenimonas alkenigignens
GCA_002382615.1	Waste water	PRJNA348753	SAMN06451303	94.52	0.99	92.03	31	48.23	962248	GB_GCA_002382615.1	p__Chloroflexota	c__Dehalococcoidia	o__Dehalococcoidales	f__Dehalococcoidaceae	g__UBA4087	s__UBA4087 sp002382615
GCA_903916765.1	Freshwater	PRJEB38681	SAMEA6956623	91.42	1.98	88.21	149	45.7	1366635	GB_GCA_903916765.1	p__Chloroflexota	c__Dehalococcoidia	o__Dehalococcoidales	f__Fen-1064	g__Fen-1064	s__Fen-1064 sp903916765
GCA_011171075.1	Marine	PRJNA605778	SAMN14094348	91.75	0	89.73	53	52.62	2136110	GB_GCA_011171075.1	p__Chloroflexota	c__Dehalococcoidia	o__Dehalococcoidales	f__Fen-1064	g__W589	s__W589 sp011171075
GCA_011170375.1	Marine	PRJNA605778	SAMN14094340	92.74	0.99	88.36	17	51.7	2277945	GB_GCA_011170375.1	p__Chloroflexota	c__Dehalococcoidia	o__Dehalococcoidales	f__Fen-1064	g__W589	s__W589 sp011170375
GCA_003141235.1	Soil	PRJNA386568	SAMN08180156	93.62	2.97	87.96	138	50.53	2151312	GB_GCA_003141235.1	p__Chloroflexota	c__Dehalococcoidia	o__Dehalococcoidales	f__RBG-16-60-22	g__Fen-1077	s__Fen-1077 sp003141235
GCA_002011495.1	Hydrothermal field	PRJNA269163	SAMN06226373	87.72	0.99	91.58	95	56.94	1798153	GB_GCA_002011495.1	p__Chloroflexota	c__Dehalococcoidia	o__Dehalococcoidales	f__RBG-16-60-22	g__JdFR-56	s__JdFR-56 sp002011495
GCA_903844845.1	Freshwater	PRJEB38681	SAMEA6952245	97.69	0.33	86.68	29	52.42	1910680	GB_GCA_903844845.1	p__Chloroflexota	c__Dehalococcoidia	o__Dehalococcoidales	f__UBA1222	g__SURF-27	s__SURF-27 sp903844845
GCA_009783135.1	Termite gut	PRJNA560329	SAMN12582041	92.74	1.32	88.45	97	48.1	1146923	GB_GCA_009783135.1	p__Chloroflexota	c__Dehalococcoidia	o__Dehalococcoidales	f__UBA1222	g__WRNG01	s__WRNG01 sp009783135
GCA_009776515.1	Termite gut	PRJNA560329	SAMN12582194	96.2	0.09	85.89	99	53.05	1344225	GB_GCA_009776515.1	p__Chloroflexota	c__Dehalococcoidia	o__Dehalococcoidales	f__UBA1222	g__WRNP01	s__WRNP01 sp009776515
GCA_011191975.1	Marine	PRJNA605778	SAMN14094345	91.91	1.98	87.09	164	44.97	3330833	GB_GCA_011191975.1	p__Chloroflexota	c__Dehalococcoidia	o__Dehalococcoidales	f__UBA2162	g__MGML01	s__MGML01 sp011191975
GCA_011328975.1	Hot spring	PRJNA480137	SAMN09639584	93.73	4.95	88.63	212	45.9	2470556	GB_GCA_011328975.1	p__Chloroflexota	c__Dehalococcoidia	o__Dehalococcoidales	f__UBA3254	g__UBA3254	s__UBA3254 sp011328975
GCA_011389395.1	Hot spring	PRJNA480137	SAMN09639874	96.2	3.96	88.56	165	47.35	2333385	GB_GCA_011389395.1	p__Chloroflexota	c__Dehalococcoidia	o__Dehalococcoidales	f__UBA3254	g__UBA3254	s__UBA3254 sp011389395
GCA_012520835.1	Bioreactor	PRJNA602310	SAMN13894084	97.69	3.36	86.51	185	46.71	1270954	GB_GCA_012520835.1	p__Chloroflexota	c__Dehalococcoidia	o__Dehalococcoidales	f__UBA5627	g__UBA5627	s__UBA5627 sp012520835
GCA_002419135.1	Waste water	PRJNA348753	SAMN06451748	90.26	0	86.6	56	43.96	1308437	GB_GCA_002419135.1	p__Chloroflexota	c__Dehalococcoidia	o__Dehalococcoidales	f__UBA5627	g__UBA5627	s__UBA5627 sp002419135
GCA_012719115.1	Bioreactor	PRJNA602310	SAMN13893645	91.75	3.47	86.84	268	44.34	1251160	GB_GCA_012719115.1	p__Chloroflexota	c__Dehalococcoidia	o__Dehalococcoidales	f__UBA5627	g__UBA5627	s__UBA5627 sp012719115
GCA_011170285.1	Marine	PRJNA605778	SAMN14094323	90.76	0.99	86.22	27	45.79	1382721	GB_GCA_011170285.1	p__Chloroflexota	c__Dehalococcoidia	o__Dehalococcoidales	f__UBA5760	g__W498	s__W498 sp011170285
GCA_011057325.1	Hot spring	PRJNA480137	SAMN09639226	97.69	1.98	88.31	33	70.29	3944893	GB_GCA_011057325.1	p__Chloroflexota	c__Dehalococcoidia	o__DSGV01	f__DSGV01	g__DSGV01	s__DSGV01 sp011057325
GCA_003228685.1	Hydrothermal field	PRJNA385762	SAMN09240169	94.47	3.96	90.11	128	63.14	3530347	GB_GCA_003228685.1	p__Chloroflexota	c__Dehalococcoidia	o__DSTF01	f__RBG-16-68-14	g__SZUA-185	s__SZUA-185 sp003228685
GCA_009377745.1	Dinosaur fossil	PRJNA494230	SAMN12830855	93.23	0.42	85	80	63.76	3534093	GB_GCA_009377745.1	p__Chloroflexota	c__Dehalococcoidia	o__DSTF01	f__WHTK01	g__WHTK01	s__WHTK01 sp009377745
GCA_004297765.1	Groundwater	PRJNA514088	SAMN10720205	96.2	1.19	86.06	256	60.75	5636236	GB_GCA_004297765.1	p__Chloroflexota	c__Dehalococcoidia	o__FW602-bin16	f__FW602-bin16	g__FW602-bin16	s__FW602-bin16 sp004297765
GCA_002717565.1	Marine	PRJNA391943	SAMN07618538	93.23	4.68	91.05	32	46.89	1683532	GB_GCA_002717565.1	p__Chloroflexota	c__Dehalococcoidia	o__GCA-2717565	f__GCA-2717565	g__GCA-2717565	s__GCA-2717565 sp002717565
GCA_011358865.1	Hot spring	PRJNA480137	SAMN09640055	92.24	0	90.93	19	50.39	1687010	GB_GCA_011358865.1	p__Chloroflexota	c__Dehalococcoidia	o__GIF9	f__AB-539-J10	g__DTMR01	s__DTMR01 sp011358865
GCA_003556385.1	Hypersaline soda lake	PRJNA434545	SAMN08574647	90.26	1.49	87.52	171	58.04	1664883	GB_GCA_003556385.1	p__Chloroflexota	c__Dehalococcoidia	o__GIF9	f__AB-539-J10	g__E29-bin54	s__E29-bin54 sp003556385
GCA_004376695.1	Marine	PRJNA485648	SAMN11124390	90.76	0.99	88.6	145	53.15	1089115	GB_GCA_004376695.1	p__Chloroflexota	c__Dehalococcoidia	o__GIF9	f__AB-539-J10	g__E29-bin54	s__E29-bin54 sp004376695
GCA_013388845.1	Hot spring	PRJNA564648	SAMN14673733	91.25	1.98	88.48	52	48.59	1377641	GB_GCA_013388845.1	p__Chloroflexota	c__Dehalococcoidia	o__GIF9	f__AB-539-J10	g__JACAEN01	s__JACAEN01 sp013388845
GCA_001796515.1	Aquifer sediment	PRJNA288027	SAMN04314098	92.24	0.2	86.51	70	50.77	1934179	GB_GCA_001796515.1	p__Chloroflexota	c__Dehalococcoidia	o__GIF9	f__AB-539-J10	g__RBG-13-51-36	s__RBG-13-51-36 sp001796515
GCA_903884455.1	Freshwater	PRJEB38681	SAMEA6956928	95.21	0.99	87.22	63	47.7	1555595	GB_GCA_903884455.1	p__Chloroflexota	c__Dehalococcoidia	o__GIF9	f__AB-539-J10	g__RBG-13-51-36	s__RBG-13-51-36 sp903884455
GCA_003552125.1	Hypersaline soda lake	PRJNA434545	SAMN08575189	93.23	2.48	87.16	175	57.63	2090445	GB_GCA_003552125.1	p__Chloroflexota	c__Dehalococcoidia	o__GIF9	f__AB-539-J10	g__SKVJ01	s__SKVJ01 sp003552125
GCA_003562475.1	Hypersaline soda lake	PRJNA434545	SAMN08574746	91.75	2.97	86.14	133	58.02	2457239	GB_GCA_003562475.1	p__Chloroflexota	c__Dehalococcoidia	o__GIF9	f__AB-539-J10	g__SKVJ01	s__SKVJ01 sp003562475
GCA_007129495.1	Hypersaline soda lake	PRJNA453733	SAMN10606972	92.24	1.98	86.35	75	56.15	2106958	GB_GCA_007129495.1	p__Chloroflexota	c__Dehalococcoidia	o__GIF9	f__AB-539-J10	g__SKVJ01	s__SKVJ01 sp007129495
GCA_002452795.1	Waste water	PRJNA348753	SAMN06451963	91.75	0	90.08	75	49.5	954862	GB_GCA_002452795.1	p__Chloroflexota	c__Dehalococcoidia	o__GIF9	f__AB-539-J10	g__UBA6803	s__UBA6803 sp002452795
GCA_011371865.1	Hot spring	PRJNA480137	SAMN09638901	91.88	0	91.4	173	52.64	1571774	GB_GCA_011371865.1	p__Chloroflexota	c__Dehalococcoidia	o__GIF9	f__UBA5620	g__SpSt-1004	s__SpSt-1004 sp011371865
GCA_903929005.1	Freshwater	PRJEB38681	SAMEA6954588	96.7	3.19	89.41	296	52.57	2603263	GB_GCA_903929005.1	p__Chloroflexota	c__Dehalococcoidia	o__GIF9	f__UBA5629	g__CAIMUM01	s__CAIMUM01 sp903929005
GCA_003142375.1	Soil	PRJNA386568	SAMN08180137	90.1	0	90.58	30	51.37	2137522	GB_GCA_003142375.1	p__Chloroflexota	c__Dehalococcoidia	o__GIF9	f__UBA5629	g__UBA1162	s__UBA1162 sp003142375
GCA_002311135.1	Soil	PRJNA348753	SAMN06454635	95.38	0.99	88.69	70	50.85	2227703	GB_GCA_002311135.1	p__Chloroflexota	c__Dehalococcoidia	o__GIF9	f__UBA5629	g__UBA1162	s__UBA1162 sp002311135
GCA_002011475.1	Hydrothermal field	PRJNA269163	SAMN06226371	77.89	2.31	92.29	67	59.73	1691297	GB_GCA_002011475.1	p__Chloroflexota	c__Dehalococcoidia	o__JdFR-54	f__JdFR-54	g__JdFR-54	s__JdFR-54 sp002011475
GCA_002721445.1	Marine	PRJNA391943	SAMN07618511	95.38	0.2	93.94	18	30.48	1712152	GB_GCA_002721445.1	p__Chloroflexota	c__Dehalococcoidia	o__SAR202	f__GCA-002723415	g__GCA-002723415	s__GCA-002723415 sp002721445
GCA_009392295.1	Marine	PRJNA547867	SAMN11979919	92.74	0	92.79	25	32.03	1447273	GB_GCA_009392295.1	p__Chloroflexota	c__Dehalococcoidia	o__SAR202	f__GCA-2719675	g__GCA-2719675	s__GCA-2719675 sp009392295
GCA_002719675.1	Marine	PRJNA391943	SAMN07618515	92.83	0	92.76	19	32.62	1403377	GB_GCA_002719675.1	p__Chloroflexota	c__Dehalococcoidia	o__SAR202	f__GCA-2719675	g__GCA-2719675	s__GCA-2719675 sp002719675
GCA_002722455.1	Marine	PRJNA391943	SAMN07618505	93.73	4.95	89.08	30	30.95	2484032	GB_GCA_002722455.1	p__Chloroflexota	c__Dehalococcoidia	o__SAR202	f__GCA-2722455	g__GCA-2722455	s__GCA-2722455 sp002722455
GCA_009392195.1	Marine	PRJNA547867	SAMN11979921	95.51	3.17	91.99	67	35.84	2053070	GB_GCA_009392195.1	p__Chloroflexota	c__Dehalococcoidia	o__SAR202	f__OSU-TB39	g__OSU-TB39	s__OSU-TB39 sp009392195
GCA_009840355.1	Sponge	PRJNA555144	SAMN12598254	97.69	1.54	85.46	64	58	3278736	GB_GCA_009840355.1	p__Chloroflexota	c__Dehalococcoidia	o__SAR202	f__UBA11138	g__Bin90	s__Bin90 sp009840355
GCA_002238855.1	Sponge	PRJNA326328	SAMN05959524	95.71	1.65	85.57	213	57.14	4606320	GB_GCA_002238855.1	p__Chloroflexota	c__Dehalococcoidia	o__SAR202	f__UBA11138	g__Bin90	s__Bin90 sp002238855
GCA_002313895.1	Marine	PRJNA348753	SAMN06451858	91.64	0.99	83.56	404	55.77	3395054	GB_GCA_002313895.1	p__Chloroflexota	c__Dehalococcoidia	o__SAR202	f__UBA11138	g__UBA1123	s__UBA1123 sp002313895
GCA_002328865.1	Marine	PRJNA348753	SAMN06450826	95.23	1.98	83.99	306	61.03	3859347	GB_GCA_002328865.1	p__Chloroflexota	c__Dehalococcoidia	o__SAR202	f__UBA11138	g__UBA2160	s__UBA2160 sp002328865
GCA_009838465.1	Sponge	PRJNA555144	SAMN12598346	94.72	0.99	86.59	90	58.33	3550737	GB_GCA_009838465.1	p__Chloroflexota	c__Dehalococcoidia	o__SAR202	f__UBA11138	g__VXRN01	s__VXRN01 sp009838465
GCA_002699485.1	Marine	PRJNA391943	SAMN07618452	90.43	1.49	93.62	61	38.81	1906463	GB_GCA_002699485.1	p__Chloroflexota	c__Dehalococcoidia	o__SAR202	f__UBA2962	g__UBA2962	s__UBA2962 sp002699485
GCA_009392275.1	Marine	PRJNA547867	SAMN11979918	91.97	0	93.11	23	38.85	1532285	GB_GCA_009392275.1	p__Chloroflexota	c__Dehalococcoidia	o__SAR202	f__UBA2962	g__UBA2962	s__UBA2962 sp002728115
GCA_002717465.1	Marine	PRJNA391943	SAMN07618526	90.56	2.18	92.51	35	40.23	1985284	GB_GCA_002717465.1	p__Chloroflexota	c__Dehalococcoidia	o__SAR202	f__UBA826	g__GCA-2717465	s__GCA-2717465 sp002717465
GCA_002435305.1	Marine	PRJNA348753	SAMN06453191	90.26	0.99	88.4	216	42.85	1997934	GB_GCA_002435305.1	p__Chloroflexota	c__Dehalococcoidia	o__SAR202	f__UBA826	g__UBA11996	s__UBA11996 sp002435305
GCA_002728195.1	Marine	PRJNA391943	SAMN07618484	92.05	0.99	93	110	41.5	1716093	GB_GCA_002728195.1	p__Chloroflexota	c__Dehalococcoidia	o__SAR202	f__UBA826	g__UBA11996	s__UBA11996 sp002728195
GCA_008373095.1	Marine	PRJNA504027	SAMN10392633	90.56	1.98	92.78	104	41.96	1951973	GB_GCA_008373095.1	p__Chloroflexota	c__Dehalococcoidia	o__SAR202	f__UBA826	g__UBA11996	s__UBA11996 sp002320875
GCA_002718095.1	Marine	PRJNA391943	SAMN07618527	91.75	0.2	94.38	10	34.55	1437644	GB_GCA_002718095.1	p__Chloroflexota	c__Dehalococcoidia	o__SAR202	f__UBA826	g__UBA826	s__UBA826 sp002718095
GCA_009841605.1	Sponge	PRJNA555144	SAMN12598189	96.7	0.99	86.9	159	60.7	3226973	GB_GCA_009841605.1	p__Chloroflexota	c__Dehalococcoidia	o__SAR202	f__VXLM01	g__VXLM01	s__VXLM01 sp009841605
GCA_002711005.1	Marine	PRJNA391943	SAMN07618453	83.69	1.98	94.88	28	30.56	1277955	GB_GCA_002711005.1	p__Chloroflexota	c__Dehalococcoidia	o__SAR202	f_GCA-002711005	g__GCA-002711005	s__GCA-002711005 sp002711005
GCA_003228115.1	Marine	PRJNA471535	SAMN08332066	98.68	0	87.91	18	58.47	2777268	GB_GCA_003228115.1	p__Chloroflexota	c__Dehalococcoidia	o__SAR202-VII-2	f__SAR202-VII-2	g__SAR202-VII-2	s__SAR202-VII-2 sp003228115
GCA_009693015.1	Freshwater	PRJNA521725	SAMN10915717	92.74	0	87.4	60	65.83	1952790	GB_GCA_009693015.1	p__Chloroflexota	c__Dehalococcoidia	o__SHYB01	f__SHYB01	g__SHYB01	s__SHYB01 sp009693015
GCA_011373495.1	Hot spring	PRJNA480137	SAMN09638969	94.72	0	94.74	130	59.69	1590436	GB_GCA_011373495.1	p__Chloroflexota	c__Dehalococcoidia	o__SM23-28-2	f__HRbin24	g__DRWY01	s__DRWY01 sp011373495
GCA_011380505.1	Hot spring	PRJNA480137	SAMN09638994	92.24	0	92.91	293	68.77	1871096	GB_GCA_011380505.1	p__Chloroflexota	c__Dehalococcoidia	o__SM23-28-2	f__HRbin24	g__HRBIN24	s__HRBIN24 sp011380505
GCA_011047455.1	Hot spring	PRJNA480137	SAMN09639386	96.7	0	91.17	31	70.85	2283727	GB_GCA_011047455.1	p__Chloroflexota	c__Dehalococcoidia	o__SM23-28-2	f__HRbin24	g__HRBIN24	s__HRBIN24 sp011047455
GCA_002898715.1	Geothermal water	PRJDB6348	SAMD00093774	93.73	3.96	92.38	159	69.26	2051769	GB_GCA_002898715.1	p__Chloroflexota	c__Dehalococcoidia	o__SM23-28-2	f__HRbin24	g__HRBIN24	s__HRBIN24 sp002898715
GCA_002898615.1	Hot spring	PRJDB6348	SAMD00093775	61.75	0	92.2	106	69.51	989871	GB_GCA_002898615.1	p__Chloroflexota	c__Dehalococcoidia	o__SM23-28-2	f__HRbin24	g__HRBIN25	s__HRBIN25 sp002898615
GCA_005882985.1	Soil	PRJNA449266	SAMN11380393	92.08	0	88.82	315	62.94	2619356	GB_GCA_005882985.1	p__Chloroflexota	c__Dehalococcoidia	o__SM23-28-2	f__RBG-16-64-32	g__CF-163	s__CF-163 sp005882985
GCA_009377715.1	Dinosaur fossil	PRJNA494230	SAMN12830858	93.04	0.09	86.83	129	56.96	2346458	GB_GCA_009377715.1	p__Chloroflexota	c__Dehalococcoidia	o__SM23-28-2	f__WHTN01	g__WHTN01	s__WHTN01 sp009377715
GCA_011053995.1	Hot spring sediment	PRJNA480137	SAMN09639296	93.73	0	93.55	36	66.84	2765167	GB_GCA_011053995.1	p__Chloroflexota	c__Dehalococcoidia	o__SpSt-223	f__SpSt-223	g__SpSt-223	s__SpSt-223 sp011053995
GCA_013203045.1	Saline lake	PRJNA616293	SAMN14944593	96.7	1.98	86.82	277	46.92	3967808	GB_GCA_013203045.1	p__Chloroflexota	c__Dehalococcoidia	o__SZUA-161	f__SpSt-899	g__JABMQN01	s__JABMQN01 sp013203045
GCA_011358905.1	Hot spring	PRJNA480137	SAMN09640045	94.72	1.98	89.46	72	59.11	2363450	GB_GCA_011358905.1	p__Chloroflexota	c__Dehalococcoidia	o__SZUA-161	f__SpSt-899	g__SpSt-899	s__SpSt-899 sp011358905
GCA_011174795.1	Marine	PRJNA605778	SAMN14094343	91.25	0	91.29	76	54.11	1812091	GB_GCA_011174795.1	p__Chloroflexota	c__Dehalococcoidia	o__SZUA-161	f__SZUA-161	g__W281	s__W281 sp011174795
GCA_002239045.1	Sponge	PRJNA326328	SAMN05959534	95.51	1.98	89.75	21	56.35	3017767	GB_GCA_002239045.1	p__Chloroflexota	c__Dehalococcoidia	o__UBA1151	f__Bin127	g__Bin127	s__Bin127 sp002239045
GCA_009838175.1	Sponge	PRJNA555144	SAMN12598360	95.21	0.99	90.14	70	56.32	2635461	GB_GCA_009838175.1	p__Chloroflexota	c__Dehalococcoidia	o__UBA1151	f__Bin127	g__Bin127	s__Bin127 sp009838175
GCA_002728715.1	Marine	PRJNA391943	SAMN07618648	90.35	0	95.01	33	31.43	1348634	GB_GCA_002728715.1	p__Chloroflexota	c__Dehalococcoidia	o__UBA1151	f__Bin127	g__GCA-002708145	s__GCA-002708145 sp002728715
GCA_002712125.1	Marine	PRJNA391943	SAMN07618491	93.73	0.99	94.96	34	31.32	1355491	GB_GCA_002712125.1	p__Chloroflexota	c__Dehalococcoidia	o__UBA1151	f__Bin127	g__GCA-002708145	s__GCA-002708145 sp002712125
GCA_002714425.1	Marine	PRJNA391943	SAMN07618485	95.71	0.99	94.92	18	31.58	1395102	GB_GCA_002714425.1	p__Chloroflexota	c__Dehalococcoidia	o__UBA1151	f__Bin127	g__GCA-002708145	s__GCA-002708145 sp002714425
GCA_009392785.1	Marine	PRJNA547867	SAMN11979888	78.15	2.97	90.92	255	46.74	2040367	GB_GCA_002717805.1	p__Chloroflexota	c__Dehalococcoidia	o__UBA1151	f__Bin127	g__GCA-002725925	s__GCA-002725925 sp009392785
GCA_013204545.1	Saline lake	PRJNA616293	SAMN14944515	96.7	3.08	87.54	134	50.46	2951305	GB_GCA_013204545.1	p__Chloroflexota	c__Dehalococcoidia	o__UBA1151	f__Bin127	g__UBA1328	s__UBA1328 sp013204545
GCA_002306745.1	Marine	PRJNA348753	SAMN06453173	85.42	0.99	87.39	303	44.91	2055814	GB_GCA_002306745.1	p__Chloroflexota	c__Dehalococcoidia	o__UBA1151	f__Bin127	g__UBA1328	s__UBA1328 sp002306745
GCA_012959765.1	Hydrothermal field	PRJNA522654	SAMN10967665	98.68	0	86.7	71	54.11	2626509	GB_GCA_012959765.1	p__Chloroflexota	c__Dehalococcoidia	o__UBA1151	f__Bin127	g__UBA1328	s__UBA1328 sp012959765
GCA_002306815.1	Marine	PRJNA348753	SAMN06453720	91.28	0	85.76	118	51.58	2065707	GB_GCA_002306815.1	p__Chloroflexota	c__Dehalococcoidia	o__UBA1151	f__Bin127	g__UBA1328	s__UBA1328 sp002306815
GCA_009693115.1	Freshwater	PRJNA521725	SAMN10915712	96.7	0	85.49	40	62.13	2016578	GB_GCA_009693115.1	p__Chloroflexota	c__Dehalococcoidia	o__UBA1151	f__SHXW01	g__SHXW01	s__SHXW01 sp009693115
GCA_002703265.1	Marine	PRJNA391943	SAMN07618442	91.88	4.51	94.96	42	31.2	1337577	GB_GCA_002703265.1	p__Chloroflexota	c__Dehalococcoidia	o__UBA1151	f__TMED-70	g__TMED-70	s__TMED-70 sp002703265
GCA_002730555.1	Marine	PRJNA391943	SAMN07618469	97.69	0	85.63	41	61.36	2568346	GB_GCA_002730555.1	p__Chloroflexota	c__Dehalococcoidia	o__UBA1151	f__UBA1151	g__GCA-2730555	s__GCA-2730555 sp002730555
GCA_013204555.1	Saline lake	PRJNA616293	SAMN14944516	96.7	0.11	88.69	82	55.97	3733397	GB_GCA_013204555.1	p__Chloroflexota	c__Dehalococcoidia	o__UBA1151	f__UBA1151	g__UBA1151	s__UBA1151 sp013204555
GCA_002347295.1	Waste water	PRJNA348753	SAMN06452696	93.73	0	84.92	75	42.59	1520949	GB_GCA_002347295.1	p__Chloroflexota	c__Dehalococcoidia	o__UBA2247	f__UBA2247	g__UBA2247	s__UBA2247 sp002347295
GCA_003551705.1	Hypersaline soda lake	PRJNA434545	SAMN08575219	92.41	0	88.06	212	55.63	2812446	GB_GCA_003551705.1	p__Chloroflexota	c__Dehalococcoidia	o__UBA2777	f__RBG-13-53-26	g__PUNJ01	s__PUNJ01 sp003551705
GCA_009838965.1	Sponge	PRJNA555144	SAMN12598322	96.7	0.99	89.7	138	65.94	3013978	GB_GCA_009838965.1	p__Chloroflexota	c__Dehalococcoidia	o__UBA2963	f__UBA2963	g__Bin16	s__Bin16 sp009838965
GCA_003215215.1	Marine	PRJNA445865	SAMN08886378	69.17	0.99	94.17	73	41.95	1133596	GB_GCA_003215215.1	p__Chloroflexota	c__Dehalococcoidia	o__UBA2963	f__UBA2963	g__UBA2963	s__UBA2963 sp003215215
GCA_903917615.1	Freshwater	PRJEB38681	SAMEA6954296	91.25	4.63	89.99	315	69.29	2675076	GB_GCA_903917615.1	p__Chloroflexota	c__Dehalococcoidia	o__UBA2979	f__UBA2979	g__SHYQ01	s__SHYQ01 sp903917615
GCA_004297315.1	Groundwater	PRJNA514088	SAMN10720200	91.42	3.3	90.82	323	69.15	2508032	GB_GCA_004297315.1	p__Chloroflexota	c__Dehalococcoidia	o__UBA2979	f__UBA2979	g__SURF-43	s__SURF-43 sp004297315
GCA_002707835.1	Marine	PRJNA391943	SAMN07618497	93.37	0.99	93.97	23	38.58	1642008	GB_GCA_002707835.1	p__Chloroflexota	c__Dehalococcoidia	o__UBA2979	f__UBA2979	g__UBA6955	s__UBA6955 sp002707835
GCA_009839925.1	Sponge	PRJNA555144	SAMN12598273	91.58	0.11	91.09	245	71.11	2857508	GB_GCA_009839925.1	p__Chloroflexota	c__Dehalococcoidia	o__UBA2979	f__UBA2979	g__VXMT01	s__VXMT01 sp009839925
GCA_009840945.1	Sponge	PRJNA555144	SAMN12598223	90.92	0	89.89	157	71.01	2530627	GB_GCA_009840945.1	p__Chloroflexota	c__Dehalococcoidia	o__UBA2979	f__UBA2979	g__VXMT01	s__VXMT01 sp009840945
GCA_009379925.1	Dinosaur fossil	PRJNA494230	SAMN12830839	91.25	0.99	88.99	71	69.82	3544553	GB_GCA_009379925.1	p__Chloroflexota	c__Dehalococcoidia	o__UBA2979	f__UBA2979	g__WHSU01	s__WHSU01 sp009379925
GCA_002717805.1	Marine	PRJNA391943	SAMN07618532	83.28	0	91.11	25	41.62	1323200	GB_GCA_002717805.1	p__Chloroflexota	c__Dehalococcoidia	o__UBA2985	f__UBA2985	g__UBA2985	s__UBA2985 sp002717805
GCA_009391535.1	Marine	PRJNA547867	SAMN11979938	90.26	0.99	92.07	26	41.08	1362308	GB_GCA_009391535.1	p__Chloroflexota	c__Dehalococcoidia	o__UBA2985	f__UBA2985	g__VFHP01	s__VFHP01 sp009391535
GCA_002898215.1	Geothermal water	PRJDB6348	SAMD00093779	93.73	0	92.35	4	69.28	2343573	GB_GCA_002898215.1	p__Chloroflexota	c__Dehalococcoidia	o__UBA2991	f__UBA2991	g__HRBIN29	s__HRBIN29 sp002898215
GCA_011048275.1	Hot spring sediment	PRJNA480137	SAMN09639208	93.73	0	93.25	5	69.14	2271247	GB_GCA_011048275.1	p__Chloroflexota	c__Dehalococcoidia	o__UBA2991	f__UBA2991	g__HRBIN29	s__HRBIN29 sp011048275
GCA_007118095.1	Hypersaline soda lake	PRJNA453733	SAMN10606194	95.71	1.98	91.29	227	65.19	3226155	GB_GCA_007118095.1	p__Chloroflexota	c__Dehalococcoidia	o__UBA2991	f__UBA2991	g__SLAK01	s__SLAK01 sp007118095
GCF_008838325.1	Hot spring	PRJNA224116	SAMN12500377	96.7	0.99	91.93	1	69.88	2746948	RS_GCF_008838325.1	p__Chloroflexota	c__Dehalococcoidia	o__UBA2991	f__UBA2991	g__Tepidiforma	s__Tepidiforma bonchosmolovskayae
GCF_002563855.1	Hot spring	PRJNA224116	SAMN05216314	96.7	0.99	91.52	1	69.37	2743337	RS_GCF_002563855.1	p__Chloroflexota	c__Dehalococcoidia	o__UBA2991	f__UBA2991	g__Tepidiforma	s__Tepidiforma sp002563855
GCA_009839725.1	Sponge	PRJNA555144	SAMN12598286	94.72	0	91.91	169	68.89	2834774	GB_GCA_009839725.1	p__Chloroflexota	c__Dehalococcoidia	o__UBA2991	f__UBA2991	g__UBA2991	s__UBA2991 sp009839725
GCA_009841435.1	Sponge	PRJNA555144	SAMN12598199	95.31	0.99	92.4	138	68.58	2708205	GB_GCA_009841435.1	p__Chloroflexota	c__Dehalococcoidia	o__UBA2991	f__UBA2991	g__UBA2991	s__UBA2991 sp009841435
GCA_002346645.1	Marine	PRJNA348753	SAMN06456351	91.25	0.99	91.9	60	54.98	1873976	GB_GCA_002346645.1	p__Chloroflexota	c__Dehalococcoidia	o__UBA2991	f__UBA2991	g__UBA2991	s__UBA2991 sp002346645
GCA_003523055.1	Marine	PRJNA417962	SAMN08019790	94.96	0.2	90.81	114	37.42	1790256	GB_GCA_003523055.1	p__Chloroflexota	c__Dehalococcoidia	o__UBA3495	f__UBA2588	g__UBA2588	s__UBA2588 sp003523055
GCA_002723125.1	Marine	PRJNA391943	SAMN07618502	94.63	1.19	94.29	18	39.93	1660234	GB_GCA_002723125.1	p__Chloroflexota	c__Dehalococcoidia	o__UBA3495	f__UBA2588	g__UBA2588	s__UBA2588 sp002723125
GCA_009840135.1	Sponge	PRJNA555144	SAMN12598262	95.87	0.99	82.9	237	59.23	3454762	GB_GCA_009840135.1	p__Chloroflexota	c__Dehalococcoidia	o__UBA3495	f__UBA3495	g__Bin22	s__Bin22 sp009840135
GCA_002238505.1	Sponge	PRJNA326328	SAMN05959503	97.69	1.98	82.91	58	59.2	4393250	GB_GCA_002238505.1	p__Chloroflexota	c__Dehalococcoidia	o__UBA3495	f__UBA3495	g__Bin22	s__Bin22 sp002238505
GCA_002238825.1	Sponge	PRJNA326328	SAMN05959523	96.59	0	84.95	67	62.79	4958136	GB_GCA_002238825.1	p__Chloroflexota	c__Dehalococcoidia	o__UBA3495	f__UBA3495	g__Bin87	s__Bin87 sp002238825
GCA_009840165.1	Sponge	PRJNA555144	SAMN12598261	94.72	0	88.62	143	61.35	3757816	GB_GCA_009840165.1	p__Chloroflexota	c__Dehalococcoidia	o__UBA3495	f__UBA3495	g__Bin87	s__Bin87 sp009840165
GCA_009692925.1	Freshwater	PRJNA521725	SAMN10915722	92.74	0	84.91	101	64.29	2065070	GB_GCA_009692925.1	p__Chloroflexota	c__Dehalococcoidia	o__UBA3495	f__UBA3495	g__SHYG01	s__SHYG01 sp009692925
GCA_002311385.1	Hydrothermal field	PRJNA348753	SAMN06452090	95.84	1.98	81.29	445	54.74	3766836	GB_GCA_002311385.1	p__Chloroflexota	c__Dehalococcoidia	o__UBA3495	f__UBA3495	g__UBA1141	s__UBA1141 sp002311385
GCA_002710215.1	Marine	PRJNA391943	SAMN07618500	92.54	2.97	85.68	76	57.75	3074704	GB_GCA_002710215.1	p__Chloroflexota	c__Dehalococcoidia	o__UBA3495	f__UBA3495	g__UBA11650	s__UBA11650 sp002710215
GCA_002698265.1	Marine	PRJNA391943	SAMN07618464	79.57	0.2	87.41	106	58.89	2095193	GB_GCA_002698265.1	p__Chloroflexota	c__Dehalococcoidia	o__UBA3495	f__UBA3495	g__UBA9611	s__UBA9611 sp002698265
GCA_002721995.1	Marine	PRJNA391943	SAMN07618504	89.77	0.99	87.68	50	60.65	2565722	GB_GCA_002721995.1	p__Chloroflexota	c__Dehalococcoidia	o__UBA3495	f__UBA3495	g__UBA9611	s__UBA9611 sp002721995
GCA_013204585.1	Saline lake	PRJNA616293	SAMN14944513	94.72	2.38	86.94	76	55.76	3127064	GB_GCA_013204585.1	p__Chloroflexota	c__Dehalococcoidia	o__UBA3495	f__UBA3495	g__UBA9611	s__UBA9611 sp013204585
GCA_012959605.1	Hydrothermal field	PRJNA522654	SAMN10967671	95.71	0	85.58	188	54.72	2812808	GB_GCA_012959605.1	p__Chloroflexota	c__Dehalococcoidia	o__UBA3495	f__UBA3495	g__UBA9611	s__UBA9611 sp012959605
GCA_002328185.1	Marine	PRJNA348753	SAMN06455860	92.57	0	83.72	167	58.28	3034687	GB_GCA_002328185.1	p__Chloroflexota	c__Dehalococcoidia	o__UBA3495	f__UBA3495	g__UBA9611	s__UBA9611 sp002328185
GCA_002746355.1	Marine	PRJNA391950	SAMN07568840	96.7	0.99	85.02	101	58.65	3538345	GB_GCA_002746355.1	p__Chloroflexota	c__Dehalococcoidia	o__UBA3495	f__UBA3495	g__UBA9611	s__UBA9611 sp002746355
GCA_009840175.1	Sponge	PRJNA555144	SAMN12598263	97.69	0.99	85.72	306	61.76	4312190	GB_GCA_009840175.1	p__Chloroflexota	c__Dehalococcoidia	o__UBA3495	f__UBA3495	g__VXOI01	s__VXOI01 sp009840175
GCA_002816355.1	Marine	PRJNA356693	SAMN06121264	65.92	0.99	87.19	44	56.97	1550322	GB_GCA_002816355.1	p__Chloroflexota	c__Dehalococcoidia	o__UBA3495	f__UBA3495	UBA_9611	s__UBA9611 sp002816355
GCA_009837355.1	Sponge	PRJNA555144	SAMN12598402	96.59	0	89.99	95	62.98	3250911	GB_GCA_009837355.1	p__Chloroflexota	c__Dehalococcoidia	o__UBA3495f__UBA3495g__Bin87s__Bin87 sp009837355	f__UBA3495	g__Bin87	s__Bin87 sp009837355
GCA_002450835.1	Marine	PRJNA348753	SAMN06450478	94.39	0.99	91.07	50	40.8	1250736	GB_GCA_002450835.1	p__Chloroflexota	c__Dehalococcoidia	o__UBA6926	f__UBA6926	g__UBA6926	s__UBA6926 sp002450835
GCA_009841045.1	Sponge	PRJNA555144	SAMN12598217	93.73	0	91.03	71	60.49	1952380	GB_GCA_009841045.1	p__Chloroflexota	c__Dehalococcoidia	o__UBA6926	f__UBA6926	g__VXMO01	s__VXMO01 sp009841045
GCA_009392005.1	Marine	PRJNA547867	SAMN11979934	94.88	0	89.81	13	44.82	1600497	GB_GCA_009392005.1	p__Chloroflexota	c__Dehalococcoidia	o__UBA6926	f__VFHL01	g__VFHL01	s__VFHL01 sp009392005
GCA_003228195.2	Marine	PRJNA471535	SAMN09211444	97.19	1.98	91.5	28	45.9	1522803	GB_GCA_003228195.2	p__Chloroflexota	c__Dehalococcoidia	o__UBA6952	f__QGNO01	g__QGNO01	s__QGNO01 sp003228195
GCA_009392515.1	Marine	PRJNA547867	SAMN11979901	97.69	0	94.19	62	33.82	1551723	GB_GCA_009392515.1	p__Chloroflexota	c__Dehalococcoidia	o__UBA6952	f__UBA6952	g__UBA6952	s__UBA6952 sp009392515
GCA_009377665.1	Dinosaur fossil	PRJNA494230	SAMN12830859	90.48	3.96	89.46	332	65.58	2957121	GB_GCA_009377665.1	p__Chloroflexota	c__Dehalococcoidia	o__WHTO01	f__WHTO01	g__WHTO01	s__WHTO01 sp009377665
GCA_002171675.1	Marine	PRJNA385857	SAMN06971924	82.18	5.94	94.89	47	31.08	1329160	GB_GCA_002171675.1	p__Chloroflexota	c__Dehalococcoidia	o_UBA1151	f__TMED-70	g__TMED-70	s__TMED-70 sp002171675
GCF_003967535.1	Soil-like mass volcanic zone	PRJNA224116	SAMD00152513	98.68	4.98	83.8	2	49.36	7699857	RS_GCF_003967535.1	p__Chloroflexota	c__Ktedonobacteria	o__Ktedonobacterales	f__Ktedonobacteraceae	g__Tengunoibacter	s__Tengunoibacter tsumagoiensis
	Bioreactor
	Freshwater/sediment
	Geothermal water/sediment
	Hydrothermal fluid/sediment
	Marine water/sediment
	Marine sponges
	Saline or soda water/sediment
	Soil/Fossils
	Waste water/sediment/soil
	Other

## Sheet: Table S3.
Supplementary Table S3. EMP data for the Tepidiformaceae and Tepidiforma
#SampleID	BarcodeSequence	LinkerPrimerSequence	Description	host_subject_id	study_id	Title	principal_investigator	doi	ebi_accession	target_gene	target_subfragment	pcr_primers	illumina_technology	extraction_center	run_center	run_date	read_length_bp	sequences_split_libraries	observations_closed_ref_greengenes	observations_closed_ref_silva	observations_open_ref_greengenes	observations_deblur_90bp	observations_deblur_100bp	observations_deblur_150bp	emp_release1	qc_filtered	subset_10k	subset_5k	subset_2k	sample_taxid	sample_scientific_name	host_taxid	host_common_name_provided	host_common_name	host_scientific_name	host_superkingdom	host_kingdom	host_phylum	host_class	host_order	host_family	host_genus	host_species	collection_timestamp	Country	Latitude (deg)	Longitude (deg)	Depth (m)	Altitude (m)
1024.MU002.C3.HA.1.476.bulk.4.12.G1.L00	CTGAGCAGAGTC	GTGCCAGCMGCCGCGGTAA	Bulk_soil	HS11	1024	The soil microbiome influences grapevine-associated microbiota (MiSeq)	Jack Gilbert	10.1128/mBio.02527-14	ERP006348	16S rRNA	V4	FWD:GTGCCAGCMGCCGCGGTAA; REV:GGACTACHVGGGTWTCTAAT	MiSeq	ANL-Chicago	CCME	2012-08-08	151	12909	8068	8779	11213	5886	5752	4517	TRUE	TRUE	FALSE	FALSE	FALSE	410658	soil metagenome													2012-04-12T00:00:00Z	GAZ:United States of America	41.0628	-72.4503	6	0
1024.MU002.C3.HA.3.486.bulk.4.12.G1.L00	GGTCCAACTAGT	GTGCCAGCMGCCGCGGTAA	Bulk_soil	HS11	1024	The soil microbiome influences grapevine-associated microbiota (MiSeq)	Jack Gilbert	10.1128/mBio.02527-14	ERP006348	16S rRNA	V4	FWD:GTGCCAGCMGCCGCGGTAA; REV:GGACTACHVGGGTWTCTAAT	MiSeq	ANL-Chicago	CCME	2012-08-08	151	11756	7716	8351	10577	5666	5637	4491	TRUE	TRUE	FALSE	FALSE	FALSE	410658	soil metagenome													2012-04-12T00:00:00Z	GAZ:United States of America	41.0628	-72.4503	6	0
1024.SH005.C3.RH.4.466.bulk.4.12.G1.L00	CAAGTACCGTGG	GTGCCAGCMGCCGCGGTAA	Bulk_soil	HS11	1024	The soil microbiome influences grapevine-associated microbiota (MiSeq)	Jack Gilbert	10.1128/mBio.02527-14	ERP006348	16S rRNA	V4	FWD:GTGCCAGCMGCCGCGGTAA; REV:GGACTACHVGGGTWTCTAAT	MiSeq	ANL-Chicago	CCME	2012-08-08	151	11726	7437	8180	10339	5419	5361	4221	TRUE	TRUE	FALSE	FALSE	FALSE	410658	soil metagenome													2012-04-11T00:00:00Z	GAZ:United States of America	41.0153	-72.5281	6	0
1034.CHA11	TCAATGACCGCA	GTGCCAGCMGCCGCGGTAA	soil metagenome,Bg	CHA11	1034	Distinct microbial communities associated with buried soils in the Siberian tundra	Antje Gittel	10.1038/ismej.2013.219	ERP016735	16S rRNA	V4	FWD:GTGCCAGCMGCCGCGGTAA; REV:GGACTACHVGGGTWTCTAAT	HiSeq	ANL-Chicago	CCME	2012-02-15	100	257703	200931	208545	250706	111797	93050	0	TRUE	TRUE	TRUE	FALSE	FALSE	410658	soil metagenome													2010-08-01T00:00:00Z	GAZ:Russia	69.438	161.71		0
1034.CHB5	AGCCTCATGATG	GTGCCAGCMGCCGCGGTAA	soil metagenome,Bg1	CHB5	1034	Distinct microbial communities associated with buried soils in the Siberian tundra	Antje Gittel	10.1038/ismej.2013.219	ERP016735	16S rRNA	V4	FWD:GTGCCAGCMGCCGCGGTAA; REV:GGACTACHVGGGTWTCTAAT	HiSeq	ANL-Chicago	CCME	2012-02-15	100	214331	169461	175463	208945	95444	81236	0	TRUE	TRUE	FALSE	FALSE	FALSE	410658	soil metagenome													2010-08-01T00:00:00Z	GAZ:Russia	69.435	161.714		0
1034.CHB6	TTAAACCGCGCC	GTGCCAGCMGCCGCGGTAA	soil metagenome,AB	CHB6	1034	Distinct microbial communities associated with buried soils in the Siberian tundra	Antje Gittel	10.1038/ismej.2013.219	ERP016735	16S rRNA	V4	FWD:GTGCCAGCMGCCGCGGTAA; REV:GGACTACHVGGGTWTCTAAT	HiSeq	ANL-Chicago	CCME	2012-02-15	100	215321	152211	161043	208745	85035	71381	0	TRUE	TRUE	TRUE	FALSE	FALSE	410658	soil metagenome													2010-08-01T00:00:00Z	GAZ:Russia	69.435	161.714		0
1034.CHB6	TTAAACCGCGCC	GTGCCAGCMGCCGCGGTAA	soil metagenome,AB	CHB6	1034	Distinct microbial communities associated with buried soils in the Siberian tundra	Antje Gittel	10.1038/ismej.2013.219	ERP016735	16S rRNA	V4	FWD:GTGCCAGCMGCCGCGGTAA; REV:GGACTACHVGGGTWTCTAAT	HiSeq	ANL-Chicago	CCME	2012-02-15	100	215321	152211	161043	208745	85035	71381	0	TRUE	TRUE	TRUE	FALSE	FALSE	410658	soil metagenome													2010-08-01T00:00:00Z	GAZ:Russia	69.435	161.714		0
1034.CHC12	GTGCACGATAAT	GTGCCAGCMGCCGCGGTAA	soil metagenome,Bvg	CHC12	1034	Distinct microbial communities associated with buried soils in the Siberian tundra	Antje Gittel	10.1038/ismej.2013.219	ERP016735	16S rRNA	V4	FWD:GTGCCAGCMGCCGCGGTAA; REV:GGACTACHVGGGTWTCTAAT	HiSeq	ANL-Chicago	CCME	2012-02-15	100	183836	140242	145730	179750	86932	75451	0	TRUE	TRUE	FALSE	FALSE	FALSE	410658	soil metagenome													2010-08-01T00:00:00Z	GAZ:Russia	69.434	161.716		0
1034.CHF9	CGTAGGTAGAGG	GTGCCAGCMGCCGCGGTAA	soil metagenome, Cg	CHF9	1034	Distinct microbial communities associated with buried soils in the Siberian tundra	Antje Gittel	10.1038/ismej.2013.219	ERP016735	16S rRNA	V4	FWD:GTGCCAGCMGCCGCGGTAA; REV:GGACTACHVGGGTWTCTAAT	HiSeq	ANL-Chicago	CCME	2012-08-28	100	46806	38326	40363	46180	33708	32183	0	TRUE	TRUE	FALSE	FALSE	FALSE	410658	soil metagenome													2010-08-01T00:00:00Z	GAZ:Russia	69.4424	161.756		0
1036.B.N.14.2.s.4.1.sequences	GAACGGGACGTA	GTGCCAGCMGCCGCGGTAA	soil metagenome B_N_14_2	XXQIITAXX	1036	Microbial communities of the deep unfrozen: Do microbes in taliks increase permafrost carbon vulnerability?	Jenni Hultman	10.1038/ismej.2011.163*	ERP016588	16S rRNA	V4	FWD:GTGCCAGCMGCCGCGGTAA; REV:GGACTACHVGGGTWTCTAAT	HiSeq	ANL-Chicago	CCME	2012-02-15	100	211401	153834	163342	208393	98563	75976	0	TRUE	TRUE	FALSE	FALSE	FALSE	410658	soil metagenome													2009-04-01T00:00:00Z	GAZ:United States of America	64.49	-157.75	0.95	0
1036.B.N.2.2.s.4.1.sequences	AACTTTCAGGAG	GTGCCAGCMGCCGCGGTAA	soil metagenome B_N_2_2	XXQIITAXX	1036	Microbial communities of the deep unfrozen: Do microbes in taliks increase permafrost carbon vulnerability?	Jenni Hultman	10.1038/ismej.2011.163*	ERP016588	16S rRNA	V4	FWD:GTGCCAGCMGCCGCGGTAA; REV:GGACTACHVGGGTWTCTAAT	HiSeq	ANL-Chicago	CCME	2012-02-15	100	203442	146866	155870	200427	93370	70970	0	TRUE	TRUE	TRUE	TRUE	FALSE	410658	soil metagenome													2009-04-01T00:00:00Z	GAZ:United States of America	64.49	-157.75	0.95	0
1036.B.N.21.1.s.4.1.sequences	GTAATGCGTAAC	GTGCCAGCMGCCGCGGTAA	soil metagenome B_N_21_1	XXQIITAXX	1036	Microbial communities of the deep unfrozen: Do microbes in taliks increase permafrost carbon vulnerability?	Jenni Hultman	10.1038/ismej.2011.163*	ERP016588	16S rRNA	V4	FWD:GTGCCAGCMGCCGCGGTAA; REV:GGACTACHVGGGTWTCTAAT	HiSeq	ANL-Chicago	CCME	2012-02-15	100	183157	134152	141896	180010	81463	62817	0	TRUE	TRUE	TRUE	TRUE	FALSE	410658	soil metagenome													2009-04-01T00:00:00Z	GAZ:United States of America	64.49	-157.75	0.95	0
1036.P.Ac.2.2.s.4.1.sequences	CTATCATCCTCA	GTGCCAGCMGCCGCGGTAA	soil metagenome P_Ac_2_2	XXQIITAXX	1036	Microbial communities of the deep unfrozen: Do microbes in taliks increase permafrost carbon vulnerability?	Jenni Hultman	10.1038/ismej.2011.163*	ERP016588	16S rRNA	V4	FWD:GTGCCAGCMGCCGCGGTAA; REV:GGACTACHVGGGTWTCTAAT	HiSeq	ANL-Chicago	CCME	2012-02-15	100	190140	157603	162736	188063	101978	72050	0	TRUE	TRUE	FALSE	FALSE	FALSE	410658	soil metagenome													2009-04-01T00:00:00Z	GAZ:United States of America	64.49	-157.75	0.7	0
1036.P.Ac.21.1.s.4.1.sequences	TGGCTTTCTATC	GTGCCAGCMGCCGCGGTAA	soil metagenome P_Ac_21_1	XXQIITAXX	1036	Microbial communities of the deep unfrozen: Do microbes in taliks increase permafrost carbon vulnerability?	Jenni Hultman	10.1038/ismej.2011.163*	ERP016588	16S rRNA	V4	FWD:GTGCCAGCMGCCGCGGTAA; REV:GGACTACHVGGGTWTCTAAT	HiSeq	ANL-Chicago	CCME	2012-02-15	100	204223	170046	173952	201594	106977	77445	0	TRUE	TRUE	FALSE	FALSE	FALSE	410658	soil metagenome													2009-04-01T00:00:00Z	GAZ:United States of America	64.49	-157.75	0.7	0
1036.P.Ac.7.2.s.4.1.sequences	ATCCCTACGGAA	GTGCCAGCMGCCGCGGTAA	soil metagenome P_Ac_7_2	XXQIITAXX	1036	Microbial communities of the deep unfrozen: Do microbes in taliks increase permafrost carbon vulnerability?	Jenni Hultman	10.1038/ismej.2011.163*	ERP016588	16S rRNA	V4	FWD:GTGCCAGCMGCCGCGGTAA; REV:GGACTACHVGGGTWTCTAAT	HiSeq	ANL-Chicago	CCME	2012-02-15	100	164071	140585	144475	162635	93232	65385	0	TRUE	TRUE	TRUE	TRUE	FALSE	410658	soil metagenome													2009-04-01T00:00:00Z	GAZ:United States of America	64.49	-157.75	0.7	0
1036.P.C.0.1.s.4.1.sequences	GTCGAATTTGCG	GTGCCAGCMGCCGCGGTAA	soil metagenome P_C_0_1	XXQIITAXX	1036	Microbial communities of the deep unfrozen: Do microbes in taliks increase permafrost carbon vulnerability?	Jenni Hultman	10.1038/ismej.2011.163*	ERP016588	16S rRNA	V4	FWD:GTGCCAGCMGCCGCGGTAA; REV:GGACTACHVGGGTWTCTAAT	HiSeq	ANL-Chicago	CCME	2012-02-15	100	194057	156931	162291	191442	98556	71252	0	TRUE	TRUE	FALSE	FALSE	FALSE	410658	soil metagenome													1997-04-01T00:00:00Z	GAZ:United States of America	64.49	-157.75		0
1036.P.C.14.1.s.4.1.sequences	ATTAAGCCTGGA	GTGCCAGCMGCCGCGGTAA	soil metagenome P_C_14_1	XXQIITAXX	1036	Microbial communities of the deep unfrozen: Do microbes in taliks increase permafrost carbon vulnerability?	Jenni Hultman	10.1038/ismej.2011.163*	ERP016588	16S rRNA	V4	FWD:GTGCCAGCMGCCGCGGTAA; REV:GGACTACHVGGGTWTCTAAT	HiSeq	ANL-Chicago	CCME	2012-02-15	100	215916	174556	179518	213009	112624	81098	0	TRUE	TRUE	TRUE	FALSE	FALSE	410658	soil metagenome													2009-04-01T00:00:00Z	GAZ:United States of America	64.49	-157.75	0.7	0
1036.P.C.2.1.s.4.1.sequences	CGTAGGTAGAGG	GTGCCAGCMGCCGCGGTAA	soil metagenome P_C_2_1	XXQIITAXX	1036	Microbial communities of the deep unfrozen: Do microbes in taliks increase permafrost carbon vulnerability?	Jenni Hultman	10.1038/ismej.2011.163*	ERP016588	16S rRNA	V4	FWD:GTGCCAGCMGCCGCGGTAA; REV:GGACTACHVGGGTWTCTAAT	HiSeq	ANL-Chicago	CCME	2012-02-15	100	144707	120021	124336	142968	77316	55655	0	TRUE	TRUE	TRUE	FALSE	FALSE	410658	soil metagenome													2009-04-01T00:00:00Z	GAZ:United States of America	64.49	-157.75	0.7	0
1036.P.N.2.1.s.4.1.sequences	TTCCTAGGCCAG	GTGCCAGCMGCCGCGGTAA	soil metagenome P_N_2_1	XXQIITAXX	1036	Microbial communities of the deep unfrozen: Do microbes in taliks increase permafrost carbon vulnerability?	Jenni Hultman	10.1038/ismej.2011.163*	ERP016588	16S rRNA	V4	FWD:GTGCCAGCMGCCGCGGTAA; REV:GGACTACHVGGGTWTCTAAT	HiSeq	ANL-Chicago	CCME	2012-02-15	100	154484	126699	130635	152453	81148	57115	0	TRUE	TRUE	TRUE	FALSE	FALSE	410658	soil metagenome													2009-04-01T00:00:00Z	GAZ:United States of America	64.49	-157.75	0.7	0
1036.P.N.2.2.s.4.1.sequences	GCCGTCTCGTAA	GTGCCAGCMGCCGCGGTAA	soil metagenome P_N_2_2	XXQIITAXX	1036	Microbial communities of the deep unfrozen: Do microbes in taliks increase permafrost carbon vulnerability?	Jenni Hultman	10.1038/ismej.2011.163*	ERP016588	16S rRNA	V4	FWD:GTGCCAGCMGCCGCGGTAA; REV:GGACTACHVGGGTWTCTAAT	HiSeq	ANL-Chicago	CCME	2012-02-15	100	96791	75771	78700	95230	47073	33045	0	TRUE	TRUE	FALSE	FALSE	FALSE	410658	soil metagenome													2009-04-01T00:00:00Z	GAZ:United States of America	64.49	-157.75	0.7	0
1036.P.N.21.2.s.4.1.sequences	GTGTTCCCAGAA	GTGCCAGCMGCCGCGGTAA	soil metagenome P_N_21_2	XXQIITAXX	1036	Microbial communities of the deep unfrozen: Do microbes in taliks increase permafrost carbon vulnerability?	Jenni Hultman	10.1038/ismej.2011.163*	ERP016588	16S rRNA	V4	FWD:GTGCCAGCMGCCGCGGTAA; REV:GGACTACHVGGGTWTCTAAT	HiSeq	ANL-Chicago	CCME	2012-02-15	100	195236	159233	164302	193110	104731	76839	0	TRUE	TRUE	FALSE	FALSE	FALSE	410658	soil metagenome													2009-04-01T00:00:00Z	GAZ:United States of America	64.49	-157.75	0.7	0
1037.IDF1.REF.MIN	TACGCCCATCAG	GTGCCAGCMGCCGCGGTAA	soil metagenome	IDF1	1037	Long-term soil productivity project	Steven Hallam	Missing: Not provided	ERP016587	16S rRNA	V4	FWD:GTGCCAGCMGCCGCGGTAA; REV:GGACTACHVGGGTWTCTAAT	HiSeq	LBNL-Berkeley	CCME	2012-02-15	100	177919	141697	146884	172543	76015	59997	0	TRUE	TRUE	TRUE	FALSE	FALSE	410658	soil metagenome													2008-01-01T00:00:00Z	GAZ:Canada	50.85	-120.42		0
1037.SBS2.OM2C0.MIN	TGGAGAGGAGAT	GTGCCAGCMGCCGCGGTAA	soil metagenome	SBS2	1037	Long-term soil productivity project	Steven Hallam	Missing: Not provided	ERP016587	16S rRNA	V4	FWD:GTGCCAGCMGCCGCGGTAA; REV:GGACTACHVGGGTWTCTAAT	HiSeq	LBNL-Berkeley	CCME	2012-02-15	100	241570	180813	194836	233686	98350	78803	0	TRUE	TRUE	TRUE	FALSE	FALSE	410658	soil metagenome													2008-01-01T00:00:00Z	GAZ:Canada	54.62	-126.3		0
1037.SBS3.OM2C0.MIN	CGCATACGACCT	GTGCCAGCMGCCGCGGTAA	soil metagenome	SBS3	1037	Long-term soil productivity project	Steven Hallam	Missing: Not provided	ERP016587	16S rRNA	V4	FWD:GTGCCAGCMGCCGCGGTAA; REV:GGACTACHVGGGTWTCTAAT	HiSeq	LBNL-Berkeley	CCME	2012-02-15	100	163951	133030	137637	159383	67691	54987	0	TRUE	TRUE	TRUE	FALSE	FALSE	410658	soil metagenome													2009-01-01T00:00:00Z	GAZ:Canada	52.32	-121.92		0
1041.S019.150	TCACGAGTCACA	GTGCCAGCMGCCGCGGTAA	Filtered lake water S019.150	S019.150	1041	Great Lake microbiome	Karl J. Rockne	Missing: Not provided	ERP016492	16S rRNA	V4	FWD:GTGCCAGCMGCCGCGGTAA; REV:GGACTACHVGGGTWTCTAAT	HiSeq	ANL-Chicago	ANL	2012-08-14	151	142235	116242	121448	141115	104234	103197	73892	TRUE	TRUE	TRUE	FALSE	FALSE	449393	freshwater metagenome													2011-05-26T00:00:00Z	GAZ:United States of America	47.371	-90.854	150	0
1041.S114.150	ACTTACGCCACG	GTGCCAGCMGCCGCGGTAA	Filtered lake water S114.150	S114.150	1041	Great Lake microbiome	Karl J. Rockne	Missing: Not provided	ERP016492	16S rRNA	V4	FWD:GTGCCAGCMGCCGCGGTAA; REV:GGACTACHVGGGTWTCTAAT	HiSeq	ANL-Chicago	ANL	2012-08-14	151	123277	101363	105221	122260	90014	88979	64824	TRUE	TRUE	TRUE	TRUE	TRUE	449393	freshwater metagenome													2011-05-28T00:00:00Z	GAZ:United States of America	46.909	-86.598	150	0
1056.Myr.tri.Mont.1.2	CTGGGTATCTCG	GTGCCAGCMGCCGCGGTAA	fecal sample from Giant anteater	1056:Myr.tri.Mont.1.2	1056	Convergence of gut microbiomes in myrmecophagous mammals	Frederic Delsuc	10.1111/mec.12501	ERP003782	16S rRNA	V4	FWD:GTGCCAGCMGCCGCGGTAA; REV:GGACTACHVGGGTWTCTAAT	MiSeq	CCME-Boulder	CCME	2012-10-09	151	20465	16414	17032	19194	13118	13131	10479	TRUE	TRUE	TRUE	TRUE	TRUE	749906	gut metagenome	71006	Giant anteater	giant anteater	Myrmecophaga tridactyla	sk__Eukaryota	k__Metazoa	p__Chordata	c__Mammalia	o__Pilosa	f__Myrmecophagidae	g__Myrmecophaga	s__Myrmecophaga_tridactyla	2012-01-19T00:00:00Z	GAZ:France	43.6	3.883	0	0
1197.SE.20101009.GY.D014S.BC.213	GTCGTCCAAATG	GTGCCAGCMGCCGCGGTAA	sediment	SE.20101009.GY.D014S.BC.213	1197	Deep sediments following Deepwater Horizon oil spill in Gulf of Mexico	Janet Jansson	10.1038/ismej.2013.254	ERP016581	16S rRNA	V4	FWD:GTGCCAGCMGCCGCGGTAA; REV:GGACTACHVGGGTWTCTAAT	HiSeq	LBNL-Berkeley	CCME	2012-01-30	100	444095	319560	331115	435313	157589	133213	0	TRUE	TRUE	TRUE	FALSE	FALSE	412755	marine sediment metagenome													2010-10-09T00:00:00Z	GAZ:Gulf of Mexico	28.5654	-88.4481	1759.94	0
1197.SE.20101010.GY.D053S.BC.241	CGTAATTGCCGC	GTGCCAGCMGCCGCGGTAA	sediment	SE.20101010.GY.D053S.BC.241	1197	Deep sediments following Deepwater Horizon oil spill in Gulf of Mexico	Janet Jansson	10.1038/ismej.2013.254	ERP016581	16S rRNA	V4	FWD:GTGCCAGCMGCCGCGGTAA; REV:GGACTACHVGGGTWTCTAAT	HiSeq	LBNL-Berkeley	CCME	2012-01-30	100	435298	226300	237735	426208	109624	83356	0	TRUE	TRUE	TRUE	FALSE	FALSE	412755	marine sediment metagenome													2010-10-10T00:00:00Z	GAZ:Gulf of Mexico	27.6512	-89.282	1409.38	0
1197.SE.20101011.GY.D064S.BC.245	CCACAGATCGAT	GTGCCAGCMGCCGCGGTAA	sediment	SE.20101011.GY.D064S.BC.245	1197	Deep sediments following Deepwater Horizon oil spill in Gulf of Mexico	Janet Jansson	10.1038/ismej.2013.254	ERP016581	16S rRNA	V4	FWD:GTGCCAGCMGCCGCGGTAA; REV:GGACTACHVGGGTWTCTAAT	HiSeq	LBNL-Berkeley	CCME	2012-01-30	100	240351	168000	175771	235424	78083	59551	0	TRUE	TRUE	TRUE	FALSE	FALSE	412755	marine sediment metagenome													2010-10-11T00:00:00Z	GAZ:Gulf of Mexico	27.528	-90.5688	1200.17	0
1197.SE.20101011.GY.D064S.BC.245.a	CATCCCTCTACT	GTGCCAGCMGCCGCGGTAA	sediment	SE.20101011.GY.D064S.BC.245	1197	Deep sediments following Deepwater Horizon oil spill in Gulf of Mexico	Janet Jansson	10.1038/ismej.2013.254	ERP016581	16S rRNA	V4	FWD:GTGCCAGCMGCCGCGGTAA; REV:GGACTACHVGGGTWTCTAAT	HiSeq	LBNL-Berkeley	CCME	2012-01-30	100	215746	145059	152399	209682	62321	47413	0	TRUE	TRUE	TRUE	TRUE	FALSE	412755	marine sediment metagenome													2010-10-11T00:00:00Z	GAZ:Gulf of Mexico	27.528	-90.5688	1200.17	0
1197.SE.20101012.GY.D013S.BC.257	GCATCAGAGTTA	GTGCCAGCMGCCGCGGTAA	sediment	SE.20101012.GY.D013S.BC.257	1197	Deep sediments following Deepwater Horizon oil spill in Gulf of Mexico	Janet Jansson	10.1038/ismej.2013.254	ERP016581	16S rRNA	V4	FWD:GTGCCAGCMGCCGCGGTAA; REV:GGACTACHVGGGTWTCTAAT	HiSeq	LBNL-Berkeley	CCME	2012-01-30	100	310308	208167	218855	301545	89277	69029	0	TRUE	TRUE	TRUE	TRUE	FALSE	412755	marine sediment metagenome													2010-10-12T00:00:00Z	GAZ:Gulf of Mexico	27.6544	-88.6379	1766	0
1197.SE.20101018.GY.D010S.BC.390	ATGTCACCGCTG	GTGCCAGCMGCCGCGGTAA	sediment	SE.20101018.GY.D010S.BC.390	1197	Deep sediments following Deepwater Horizon oil spill in Gulf of Mexico	Janet Jansson	10.1038/ismej.2013.254	ERP016581	16S rRNA	V4	FWD:GTGCCAGCMGCCGCGGTAA; REV:GGACTACHVGGGTWTCTAAT	HiSeq	LBNL-Berkeley	CCME	2012-01-30	100	191556	123603	129482	185521	53504	42342	0	TRUE	TRUE	TRUE	TRUE	FALSE	412755	marine sediment metagenome													2010-10-18T00:00:00Z	GAZ:Gulf of Mexico	28.5701	-88.0233	1883.55	0
1197.SE.20101018.GY.D012S.BC.394	TGTAACGCCGAT	GTGCCAGCMGCCGCGGTAA	sediment	SE.20101018.GY.D012S.BC.394	1197	Deep sediments following Deepwater Horizon oil spill in Gulf of Mexico	Janet Jansson	10.1038/ismej.2013.254	ERP016581	16S rRNA	V4	FWD:GTGCCAGCMGCCGCGGTAA; REV:GGACTACHVGGGTWTCTAAT	HiSeq	LBNL-Berkeley	CCME	2012-01-30	100	196158	126385	132346	190402	60491	47715	0	TRUE	TRUE	TRUE	TRUE	FALSE	412755	marine sediment metagenome													2010-10-18T00:00:00Z	GAZ:Gulf of Mexico	28.6724	-88.2339	1819	0
1521.226.11.s.7.1.sequences	CTGGAGCATGAC	GTGCCAGCMGCCGCGGTAA	PNNL, water well samples 226.11		1521	Samples presented at EMP conference June 2011 Shenzhen	Rob Knight	Missing: Not provided	ERP023684	16S rRNA	V4	FWD:GTGCCAGCMGCCGCGGTAA; REV:GGACTACHVGGGTWTCTAAT	HiSeq	CCME-Boulder	CCME	2011-05-20	90	52090	35273	36364	50858	27897	0	0	TRUE	TRUE	TRUE	FALSE	FALSE	410659	mine drainage metagenome														GAZ:United States of America	46.35	-119.94	0	0
1521.24.W.s.6.1.sequences	GCTAAGAGAGTA	GTGCCAGCMGCCGCGGTAA	G3_20090413_1115 24.W		1521	Samples presented at EMP conference June 2011 Shenzhen	Rob Knight	Missing: Not provided	ERP023684	16S rRNA	V4	FWD:GTGCCAGCMGCCGCGGTAA; REV:GGACTACHVGGGTWTCTAAT	HiSeq	CCME-Boulder	CCME	2011-05-20	90	149638	65993	72671	145824	79101	0	0	TRUE	TRUE	FALSE	FALSE	FALSE	449393	freshwater metagenome													2009-04-13T11:15:00Z	GAZ:United States of America	40.02	-105.48	0	0
1521.26.W.s.6.1.sequences	GACCACTACGAT	GTGCCAGCMGCCGCGGTAA	G3_20090424_1205 26.W		1521	Samples presented at EMP conference June 2011 Shenzhen	Rob Knight	Missing: Not provided	ERP023684	16S rRNA	V4	FWD:GTGCCAGCMGCCGCGGTAA; REV:GGACTACHVGGGTWTCTAAT	HiSeq	CCME-Boulder	CCME	2011-05-20	90	136376	59162	65992	131051	56127	0	0	TRUE	TRUE	TRUE	FALSE	FALSE	449393	freshwater metagenome													2009-04-24T12:05:00Z	GAZ:United States of America	40.02	-105.48	0	0
1521.27.W.s.6.1.sequences	GACTGCATCTTA	GTGCCAGCMGCCGCGGTAA	G3_20090507_0930 27.W		1521	Samples presented at EMP conference June 2011 Shenzhen	Rob Knight	Missing: Not provided	ERP023684	16S rRNA	V4	FWD:GTGCCAGCMGCCGCGGTAA; REV:GGACTACHVGGGTWTCTAAT	HiSeq	CCME-Boulder	CCME	2011-05-20	90	81738	32918	37970	79299	45571	0	0	TRUE	TRUE	TRUE	FALSE	FALSE	449393	freshwater metagenome													2009-05-07T09:30:00Z	GAZ:United States of America	40.02	-105.48	0	0
1521.28.W.s.6.1.sequences	GAGTAGCTCGTG	GTGCCAGCMGCCGCGGTAA	G3_20090515_0930 28.W		1521	Samples presented at EMP conference June 2011 Shenzhen	Rob Knight	Missing: Not provided	ERP023684	16S rRNA	V4	FWD:GTGCCAGCMGCCGCGGTAA; REV:GGACTACHVGGGTWTCTAAT	HiSeq	CCME-Boulder	CCME	2011-05-20	90	158307	69021	77972	154761	86266	0	0	TRUE	TRUE	TRUE	TRUE	FALSE	449393	freshwater metagenome													2009-05-15T09:30:00Z	GAZ:United States of America	40.02	-105.48	0	0
1521.30.W.s.6.1.sequences	GCACTCGTTAGA	GTGCCAGCMGCCGCGGTAA	G3_20090604_1340 30.W		1521	Samples presented at EMP conference June 2011 Shenzhen	Rob Knight	Missing: Not provided	ERP023684	16S rRNA	V4	FWD:GTGCCAGCMGCCGCGGTAA; REV:GGACTACHVGGGTWTCTAAT	HiSeq	CCME-Boulder	CCME	2011-05-20	90	121680	42320	47431	111361	51948	0	0	TRUE	TRUE	TRUE	FALSE	FALSE	449393	freshwater metagenome													2009-06-04T13:40:00Z	GAZ:United States of America	40.02	-105.48	0	0
1521.35.W.s.6.1.sequences	GACTGTCATGCA	GTGCCAGCMGCCGCGGTAA	G3_20090708_1230 35.W		1521	Samples presented at EMP conference June 2011 Shenzhen	Rob Knight	Missing: Not provided	ERP023684	16S rRNA	V4	FWD:GTGCCAGCMGCCGCGGTAA; REV:GGACTACHVGGGTWTCTAAT	HiSeq	CCME-Boulder	CCME	2011-05-20	90	153143	79088	84167	143187	72925	0	0	TRUE	TRUE	TRUE	TRUE	TRUE	449393	freshwater metagenome													2009-07-08T12:30:00Z	GAZ:United States of America	40.02	-105.48	0	0
1521.36.W.s.6.1.sequences	GAGTATGCAGCC	GTGCCAGCMGCCGCGGTAA	G3_20090714_1105 36.W		1521	Samples presented at EMP conference June 2011 Shenzhen	Rob Knight	Missing: Not provided	ERP023684	16S rRNA	V4	FWD:GTGCCAGCMGCCGCGGTAA; REV:GGACTACHVGGGTWTCTAAT	HiSeq	CCME-Boulder	CCME	2011-05-20	90	124907	71600	74177	116701	62951	0	0	TRUE	TRUE	TRUE	FALSE	FALSE	449393	freshwater metagenome													2009-07-14T11:05:00Z	GAZ:United States of America	40.02	-105.48	0	0
1521.38.W.s.6.1.sequences	GCACTGAGACGT	GTGCCAGCMGCCGCGGTAA	G3_20090730_1000 38.W		1521	Samples presented at EMP conference June 2011 Shenzhen	Rob Knight	Missing: Not provided	ERP023684	16S rRNA	V4	FWD:GTGCCAGCMGCCGCGGTAA; REV:GGACTACHVGGGTWTCTAAT	HiSeq	CCME-Boulder	CCME	2011-05-20	90	130116	26758	28525	119871	33775	0	0	TRUE	TRUE	FALSE	FALSE	FALSE	449393	freshwater metagenome													2009-07-30T10:00:00Z	GAZ:United States of America	40.02	-105.48	0	0
1521.45.W.s.6.1.sequences	GATCTCATAGGC	GTGCCAGCMGCCGCGGTAA	G3_20090925_0900 45.W		1521	Samples presented at EMP conference June 2011 Shenzhen	Rob Knight	Missing: Not provided	ERP023684	16S rRNA	V4	FWD:GTGCCAGCMGCCGCGGTAA; REV:GGACTACHVGGGTWTCTAAT	HiSeq	CCME-Boulder	CCME	2011-05-20	90	165618	123008	128137	163146	93320	0	0	TRUE	TRUE	FALSE	FALSE	FALSE	449393	freshwater metagenome													2009-09-25T09:00:00Z	GAZ:United States of America	40.02	-105.48	0	0
1521.47.W.s.6.1.sequences	GCCAGAGTCGTA	GTGCCAGCMGCCGCGGTAA	G3_20091009_0805 47.W		1521	Samples presented at EMP conference June 2011 Shenzhen	Rob Knight	Missing: Not provided	ERP023684	16S rRNA	V4	FWD:GTGCCAGCMGCCGCGGTAA; REV:GGACTACHVGGGTWTCTAAT	HiSeq	CCME-Boulder	CCME	2011-05-20	90	208242	162270	167134	204868	110821	0	0	TRUE	TRUE	TRUE	FALSE	FALSE	449393	freshwater metagenome													2009-10-09T08:05:00Z	GAZ:United States of America	40.02	-105.48	0	0
1521.49.W.s.6.1.sequences	GAAGAGTGATCA	GTGCCAGCMGCCGCGGTAA	G3_20091022_0735 49.W		1521	Samples presented at EMP conference June 2011 Shenzhen	Rob Knight	Missing: Not provided	ERP023684	16S rRNA	V4	FWD:GTGCCAGCMGCCGCGGTAA; REV:GGACTACHVGGGTWTCTAAT	HiSeq	CCME-Boulder	CCME	2011-05-20	90	83453	50092	52764	78455	39613	0	0	TRUE	TRUE	FALSE	FALSE	FALSE	449393	freshwater metagenome													2009-10-22T07:35:00Z	GAZ:United States of America	40.02	-105.48	0	0
1521.54.W.s.6.1.sequences	GCAGCCGAGTAT	GTGCCAGCMGCCGCGGTAA	GORDON_20080717_1400 54.W		1521	Samples presented at EMP conference June 2011 Shenzhen	Rob Knight	Missing: Not provided	ERP023684	16S rRNA	V4	FWD:GTGCCAGCMGCCGCGGTAA; REV:GGACTACHVGGGTWTCTAAT	HiSeq	CCME-Boulder	CCME	2011-05-20	90	134624	73016	77433	123252	60993	0	0	TRUE	TRUE	TRUE	FALSE	FALSE	449393	freshwater metagenome													2008-07-17T14:00:00Z	GAZ:United States of America	40.02	-105.48	0	0
1521.57.W.s.6.1.sequences	GAAGCTACTGTC	GTGCCAGCMGCCGCGGTAA	GORDON_20080829_1330 57.W		1521	Samples presented at EMP conference June 2011 Shenzhen	Rob Knight	Missing: Not provided	ERP023684	16S rRNA	V4	FWD:GTGCCAGCMGCCGCGGTAA; REV:GGACTACHVGGGTWTCTAAT	HiSeq	CCME-Boulder	CCME	2011-05-20	90	119965	59602	64382	117079	60945	0	0	TRUE	TRUE	TRUE	FALSE	FALSE	449393	freshwater metagenome													2008-08-29T13:30:00Z	GAZ:United States of America	40.02	-105.48	0	0
1521.CA2.s.6.1.sequences	CGATGCACCAGA	GTGCCAGCMGCCGCGGTAA	soil metagenome CA2		1521	Samples presented at EMP conference June 2011 Shenzhen	Rob Knight	Missing: Not provided	ERP023684	16S rRNA	V4	FWD:GTGCCAGCMGCCGCGGTAA; REV:GGACTACHVGGGTWTCTAAT	HiSeq	CCME-Boulder	CCME	2011-05-20	90	214431	168408	173226	203753	91994	0	0	TRUE	TRUE	FALSE	FALSE	FALSE	410658	soil metagenome													2008-01-01T00:00:00Z	GAZ:United States of America	36.05	-111.77	0.025	0
1521.EB038.s.6.1.sequences	ACGGATCGTCAG	GTGCCAGCMGCCGCGGTAA	soil metagenome EB038		1521	Samples presented at EMP conference June 2011 Shenzhen	Rob Knight	Missing: Not provided	ERP023684	16S rRNA	V4	FWD:GTGCCAGCMGCCGCGGTAA; REV:GGACTACHVGGGTWTCTAAT	HiSeq	CCME-Boulder	CCME	2011-05-20	90	199958	137856	148945	182783	85140	0	0	TRUE	TRUE	FALSE	FALSE	FALSE	410658	soil metagenome														GAZ:Tanzania	-3.36	36.53		0
1521.EB079.s.6.1.sequences	ACTGATCCTAGT	GTGCCAGCMGCCGCGGTAA	soil metagenome EB079		1521	Samples presented at EMP conference June 2011 Shenzhen	Rob Knight	Missing: Not provided	ERP023684	16S rRNA	V4	FWD:GTGCCAGCMGCCGCGGTAA; REV:GGACTACHVGGGTWTCTAAT	HiSeq	CCME-Boulder	CCME	2011-05-20	90	220965	161268	167239	200071	86789	0	0	TRUE	TRUE	FALSE	FALSE	FALSE	410658	soil metagenome														GAZ:Tanzania	-6.89	36.14		0
1521.EB079.s.6.1.sequences	ACTGATCCTAGT	GTGCCAGCMGCCGCGGTAA	soil metagenome EB079		1521	Samples presented at EMP conference June 2011 Shenzhen	Rob Knight	Missing: Not provided	ERP023684	16S rRNA	V4	FWD:GTGCCAGCMGCCGCGGTAA; REV:GGACTACHVGGGTWTCTAAT	HiSeq	CCME-Boulder	CCME	2011-05-20	90	220965	161268	167239	200071	86789	0	0	TRUE	TRUE	FALSE	FALSE	FALSE	410658	soil metagenome														GAZ:Tanzania	-6.89	36.14		0
1521.EB113.s.6.1.sequences	AGCTCCATACAG	GTGCCAGCMGCCGCGGTAA	soil metagenome EB113		1521	Samples presented at EMP conference June 2011 Shenzhen	Rob Knight	Missing: Not provided	ERP023684	16S rRNA	V4	FWD:GTGCCAGCMGCCGCGGTAA; REV:GGACTACHVGGGTWTCTAAT	HiSeq	CCME-Boulder	CCME	2011-05-20	90	364980	265270	277439	348817	177602	0	0	TRUE	TRUE	FALSE	FALSE	FALSE	410658	soil metagenome														GAZ:Tanzania	-6.06	36.49		0
1521.MD4.s.6.1.sequences	CGTTATGTACAC	GTGCCAGCMGCCGCGGTAA	soil metagenome MD4		1521	Samples presented at EMP conference June 2011 Shenzhen	Rob Knight	Missing: Not provided	ERP023684	16S rRNA	V4	FWD:GTGCCAGCMGCCGCGGTAA; REV:GGACTACHVGGGTWTCTAAT	HiSeq	CCME-Boulder	CCME	2011-05-20	90	293957	166811	170846	280669	141687	0	0	TRUE	TRUE	FALSE	FALSE	FALSE	410658	soil metagenome													2008-01-01T00:00:00Z	GAZ:United States of America	35.2	-115.87	0.025	0
1521.Temperate.deciduous.forest.s.8.1.sequences	TAGATCCTCGAT	GTGCCAGCMGCCGCGGTAA	soil metagenome Temperate.deciduous.forest		1521	Samples presented at EMP conference June 2011 Shenzhen	Rob Knight	Missing: Not provided	ERP023684	16S rRNA	V4	FWD:GTGCCAGCMGCCGCGGTAA; REV:GGACTACHVGGGTWTCTAAT	HiSeq	CCME-Boulder	CCME	2011-05-20	90	229473	178972	187069	222192	98889	0	0	TRUE	TRUE	FALSE	FALSE	FALSE	410658	soil metagenome														GAZ:Canada	43.49	-80.57		0
1579.J.2.15	GTAGTGTCAACA	GTGCCAGCMGCCGCGGTAA	soil elevation 1134m	J-2-15	1579	Hawaii Kohala volcanic soils	Eric Dubinsky	Missing: Not provided	ERP016879	16S rRNA	V4	FWD:GTGCCAGCMGCCGCGGTAA; REV:GGACTACHVGGGTWTCTAAT	HiSeq	LBNL-Berkeley	CCME	2012-08-28	100	73111	56502	61680	71614	41288	39514	0	TRUE	TRUE	TRUE	TRUE	TRUE	410658	soil metagenome													2012-07-06T00:00:00Z	GAZ:United States of America	20.108	-155.77	0.225	0
1579.J.3.15	GCCCAAGTTCAC	GTGCCAGCMGCCGCGGTAA	soil elevation 1134m	J-3-15	1579	Hawaii Kohala volcanic soils	Eric Dubinsky	Missing: Not provided	ERP016879	16S rRNA	V4	FWD:GTGCCAGCMGCCGCGGTAA; REV:GGACTACHVGGGTWTCTAAT	HiSeq	LBNL-Berkeley	CCME	2012-08-28	100	81798	65449	69321	80104	46929	44941	0	TRUE	TRUE	FALSE	FALSE	FALSE	410658	soil metagenome													2012-07-06T00:00:00Z	GAZ:United States of America	20.108	-155.77	0.225	0
1579.J.4.30	AATCAACTAGGC	GTGCCAGCMGCCGCGGTAA	soil elevation 1134m	J-4-30	1579	Hawaii Kohala volcanic soils	Eric Dubinsky	Missing: Not provided	ERP016879	16S rRNA	V4	FWD:GTGCCAGCMGCCGCGGTAA; REV:GGACTACHVGGGTWTCTAAT	HiSeq	LBNL-Berkeley	CCME	2012-08-28	100	67653	52832	57953	66295	39181	37194	0	TRUE	TRUE	FALSE	FALSE	FALSE	410658	soil metagenome													2012-07-06T00:00:00Z	GAZ:United States of America	20.108	-155.77	0.4	0
1579.MW.2.15	CTTGGTAGTGCC	GTGCCAGCMGCCGCGGTAA	soil elevation 1118m	MW-2-15	1579	Hawaii Kohala volcanic soils	Eric Dubinsky	Missing: Not provided	ERP016879	16S rRNA	V4	FWD:GTGCCAGCMGCCGCGGTAA; REV:GGACTACHVGGGTWTCTAAT	HiSeq	LBNL-Berkeley	CCME	2012-08-28	100	77984	59768	63597	76084	45200	44434	0	TRUE	TRUE	FALSE	FALSE	FALSE	410658	soil metagenome													2012-07-06T00:00:00Z	GAZ:United States of America	20.123	-155.772	0.225	0
1579.MW.2.30	AAGGAGTGCGCA	GTGCCAGCMGCCGCGGTAA	soil elevation 1118m	MW-2-30	1579	Hawaii Kohala volcanic soils	Eric Dubinsky	Missing: Not provided	ERP016879	16S rRNA	V4	FWD:GTGCCAGCMGCCGCGGTAA; REV:GGACTACHVGGGTWTCTAAT	HiSeq	LBNL-Berkeley	CCME	2012-08-28	100	91410	72269	74976	89903	54131	51985	0	TRUE	TRUE	FALSE	FALSE	FALSE	410658	soil metagenome													2012-07-06T00:00:00Z	GAZ:United States of America	20.123	-155.772	0.4	0
1622.UPMain.0.1	CAACGCTAGAAT	GTGCCAGCMGCCGCGGTAA	Freshwater sediment core slice, Uncas Pond, MA. Aseptically collected subsample.	XXQIITAXX	1622	Biodiversity and functional patterns of microbial assemblages┬áin relation to land-use change in postglacial pond sediment profiles	Alison Berry	Missing: Not provided	ERP016496	16S rRNA	V4	FWD:GTGCCAGCMGCCGCGGTAA; REV:GGACTACHVGGGTWTCTAAT	HiSeq	LBNL-Berkeley	CCME	2012-08-28	100	71618	58544	60328	70646	40653	39883	0	TRUE	TRUE	TRUE	TRUE	FALSE	556182	freshwater sediment metagenome													2011-01-01T00:00:00Z	GAZ:United States of America	42.06	-71.3776	0.01	0
1622.UPMain.10.11A	AAGACGTAGCGG	GTGCCAGCMGCCGCGGTAA	Freshwater sediment core slice, Uncas Pond, MA. Aseptically collected subsample.	XXQIITAXX	1622	Biodiversity and functional patterns of microbial assemblages┬áin relation to land-use change in postglacial pond sediment profiles	Alison Berry	Missing: Not provided	ERP016496	16S rRNA	V4	FWD:GTGCCAGCMGCCGCGGTAA; REV:GGACTACHVGGGTWTCTAAT	HiSeq	LBNL-Berkeley	CCME	2012-08-28	100	105907	70796	74944	103847	51761	50732	0	TRUE	TRUE	TRUE	TRUE	TRUE	556182	freshwater sediment metagenome													2011-01-01T00:00:00Z	GAZ:United States of America	42.06	-71.3776	0.11	0
1622.UPMain.100.101B	AGCGGCCTATTA	GTGCCAGCMGCCGCGGTAA	Freshwater sediment core slice, Uncas Pond, MA. Aseptically collected subsample.	XXQIITAXX	1622	Biodiversity and functional patterns of microbial assemblages┬áin relation to land-use change in postglacial pond sediment profiles	Alison Berry	Missing: Not provided	ERP016496	16S rRNA	V4	FWD:GTGCCAGCMGCCGCGGTAA; REV:GGACTACHVGGGTWTCTAAT	HiSeq	LBNL-Berkeley	CCME	2012-08-28	100	90468	78528	80905	89610	60919	58780	0	TRUE	TRUE	TRUE	FALSE	FALSE	556182	freshwater sediment metagenome													2011-01-01T00:00:00Z	GAZ:United States of America	42.06	-71.3776	1.01	0
1622.UPMain.112.113	TGAGGTTTGATG	GTGCCAGCMGCCGCGGTAA	Freshwater sediment core slice, Uncas Pond, MA. Aseptically collected subsample.	XXQIITAXX	1622	Biodiversity and functional patterns of microbial assemblages┬áin relation to land-use change in postglacial pond sediment profiles	Alison Berry	Missing: Not provided	ERP016496	16S rRNA	V4	FWD:GTGCCAGCMGCCGCGGTAA; REV:GGACTACHVGGGTWTCTAAT	HiSeq	LBNL-Berkeley	CCME	2012-08-28	100	110188	49628	61903	109310	60960	57989	0	TRUE	TRUE	TRUE	TRUE	FALSE	556182	freshwater sediment metagenome													2011-01-01T00:00:00Z	GAZ:United States of America	42.06	-71.3776	1.13	0
1622.UPMain.113.114	CCTCGATGCAGT	GTGCCAGCMGCCGCGGTAA	Freshwater sediment core slice, Uncas Pond, MA. Aseptically collected subsample.	XXQIITAXX	1622	Biodiversity and functional patterns of microbial assemblages┬áin relation to land-use change in postglacial pond sediment profiles	Alison Berry	Missing: Not provided	ERP016496	16S rRNA	V4	FWD:GTGCCAGCMGCCGCGGTAA; REV:GGACTACHVGGGTWTCTAAT	HiSeq	LBNL-Berkeley	CCME	2012-08-28	100	105728	49157	59950	104741	59288	56658	0	TRUE	TRUE	TRUE	FALSE	FALSE	556182	freshwater sediment metagenome													2011-01-01T00:00:00Z	GAZ:United States of America	42.06	-71.3776	1.14	0
1622.UPMain.116.117	GTTTCACGCGAA	GTGCCAGCMGCCGCGGTAA	Freshwater sediment core slice, Uncas Pond, MA. Aseptically collected subsample.	XXQIITAXX	1622	Biodiversity and functional patterns of microbial assemblages┬áin relation to land-use change in postglacial pond sediment profiles	Alison Berry	Missing: Not provided	ERP016496	16S rRNA	V4	FWD:GTGCCAGCMGCCGCGGTAA; REV:GGACTACHVGGGTWTCTAAT	HiSeq	LBNL-Berkeley	CCME	2012-08-28	100	90679	40889	50217	90038	53812	51354	0	TRUE	TRUE	TRUE	FALSE	FALSE	556182	freshwater sediment metagenome													2011-01-01T00:00:00Z	GAZ:United States of America	42.06	-71.3776	1.17	0
1622.UPMain.118.119	CACGCTATTGGA	GTGCCAGCMGCCGCGGTAA	Freshwater sediment core slice, Uncas Pond, MA. Aseptically collected subsample.	XXQIITAXX	1622	Biodiversity and functional patterns of microbial assemblages┬áin relation to land-use change in postglacial pond sediment profiles	Alison Berry	Missing: Not provided	ERP016496	16S rRNA	V4	FWD:GTGCCAGCMGCCGCGGTAA; REV:GGACTACHVGGGTWTCTAAT	HiSeq	LBNL-Berkeley	CCME	2012-08-28	100	98519	48621	60442	97855	59122	56191	0	TRUE	TRUE	TRUE	TRUE	FALSE	556182	freshwater sediment metagenome													2011-01-01T00:00:00Z	GAZ:United States of America	42.06	-71.3776	1.19	0
1622.UPMain.12.13B	ACGCTTAACGAC	GTGCCAGCMGCCGCGGTAA	Freshwater sediment core slice, Uncas Pond, MA. Aseptically collected subsample.	XXQIITAXX	1622	Biodiversity and functional patterns of microbial assemblages┬áin relation to land-use change in postglacial pond sediment profiles	Alison Berry	Missing: Not provided	ERP016496	16S rRNA	V4	FWD:GTGCCAGCMGCCGCGGTAA; REV:GGACTACHVGGGTWTCTAAT	HiSeq	LBNL-Berkeley	CCME	2012-08-28	100	75063	47190	50572	73946	37441	36594	0	TRUE	TRUE	TRUE	FALSE	FALSE	556182	freshwater sediment metagenome													2011-01-01T00:00:00Z	GAZ:United States of America	42.06	-71.3776	0.13	0
1622.UPMain.120.121	TACCTGTGTCTT	GTGCCAGCMGCCGCGGTAA	Freshwater sediment core slice, Uncas Pond, MA. Aseptically collected subsample.	XXQIITAXX	1622	Biodiversity and functional patterns of microbial assemblages┬áin relation to land-use change in postglacial pond sediment profiles	Alison Berry	Missing: Not provided	ERP016496	16S rRNA	V4	FWD:GTGCCAGCMGCCGCGGTAA; REV:GGACTACHVGGGTWTCTAAT	HiSeq	LBNL-Berkeley	CCME	2012-08-28	100	95670	79032	85323	94732	65534	63430	0	TRUE	TRUE	TRUE	FALSE	FALSE	556182	freshwater sediment metagenome													2011-01-01T00:00:00Z	GAZ:United States of America	42.06	-71.3776	1.21	0
1622.UPMain.124.125B	TTGTATGACAGG	GTGCCAGCMGCCGCGGTAA	Freshwater sediment core slice, Uncas Pond, MA. Aseptically collected subsample.	XXQIITAXX	1622	Biodiversity and functional patterns of microbial assemblages┬áin relation to land-use change in postglacial pond sediment profiles	Alison Berry	Missing: Not provided	ERP016496	16S rRNA	V4	FWD:GTGCCAGCMGCCGCGGTAA; REV:GGACTACHVGGGTWTCTAAT	HiSeq	LBNL-Berkeley	CCME	2012-08-28	100	77020	61574	67086	76317	54394	52153	0	TRUE	TRUE	TRUE	TRUE	FALSE	556182	freshwater sediment metagenome													2011-01-01T00:00:00Z	GAZ:United States of America	42.06	-71.3776	1.25	0
1622.UPMain.138.139	CGTAGAGCTCTC	GTGCCAGCMGCCGCGGTAA	Freshwater sediment core slice, Uncas Pond, MA. Aseptically collected subsample.	XXQIITAXX	1622	Biodiversity and functional patterns of microbial assemblages┬áin relation to land-use change in postglacial pond sediment profiles	Alison Berry	Missing: Not provided	ERP016496	16S rRNA	V4	FWD:GTGCCAGCMGCCGCGGTAA; REV:GGACTACHVGGGTWTCTAAT	HiSeq	LBNL-Berkeley	CCME	2012-08-28	100	64776	32462	40020	64181	37074	34748	0	TRUE	TRUE	TRUE	FALSE	FALSE	556182	freshwater sediment metagenome													2011-01-01T00:00:00Z	GAZ:United States of America	42.06	-71.3776	1.39	0
1622.UPMain.15.16B	TGAAAGCGGCGA	GTGCCAGCMGCCGCGGTAA	Freshwater sediment core slice, Uncas Pond, MA. Aseptically collected subsample.	XXQIITAXX	1622	Biodiversity and functional patterns of microbial assemblages┬áin relation to land-use change in postglacial pond sediment profiles	Alison Berry	Missing: Not provided	ERP016496	16S rRNA	V4	FWD:GTGCCAGCMGCCGCGGTAA; REV:GGACTACHVGGGTWTCTAAT	HiSeq	LBNL-Berkeley	CCME	2012-08-28	100	86619	53678	57832	85038	42782	41538	0	TRUE	TRUE	TRUE	FALSE	FALSE	556182	freshwater sediment metagenome													2011-01-01T00:00:00Z	GAZ:United States of America	42.06	-71.3776	0.16	0
1622.UPMain.20.21	AGCAGCTATTGC	GTGCCAGCMGCCGCGGTAA	Freshwater sediment core slice, Uncas Pond, MA. Aseptically collected subsample.	XXQIITAXX	1622	Biodiversity and functional patterns of microbial assemblages┬áin relation to land-use change in postglacial pond sediment profiles	Alison Berry	Missing: Not provided	ERP016496	16S rRNA	V4	FWD:GTGCCAGCMGCCGCGGTAA; REV:GGACTACHVGGGTWTCTAAT	HiSeq	LBNL-Berkeley	CCME	2012-08-28	100	111003	63941	70761	109661	56855	55279	0	TRUE	TRUE	TRUE	FALSE	FALSE	556182	freshwater sediment metagenome													2011-01-01T00:00:00Z	GAZ:United States of America	42.06	-71.3776	0.21	0
1622.UPMain.23.24	GCACAAGGCAAG	GTGCCAGCMGCCGCGGTAA	Freshwater sediment core slice, Uncas Pond, MA. Aseptically collected subsample.	XXQIITAXX	1622	Biodiversity and functional patterns of microbial assemblages┬áin relation to land-use change in postglacial pond sediment profiles	Alison Berry	Missing: Not provided	ERP016496	16S rRNA	V4	FWD:GTGCCAGCMGCCGCGGTAA; REV:GGACTACHVGGGTWTCTAAT	HiSeq	LBNL-Berkeley	CCME	2012-08-28	100	82632	43552	49052	81484	41788	40303	0	TRUE	TRUE	TRUE	FALSE	FALSE	556182	freshwater sediment metagenome													2011-01-01T00:00:00Z	GAZ:United States of America	42.06	-71.3776	0.24	0
1622.UPMain.25.26	TAGCAGTTGCGT	GTGCCAGCMGCCGCGGTAA	Freshwater sediment core slice, Uncas Pond, MA. Aseptically collected subsample.	XXQIITAXX	1622	Biodiversity and functional patterns of microbial assemblages┬áin relation to land-use change in postglacial pond sediment profiles	Alison Berry	Missing: Not provided	ERP016496	16S rRNA	V4	FWD:GTGCCAGCMGCCGCGGTAA; REV:GGACTACHVGGGTWTCTAAT	HiSeq	LBNL-Berkeley	CCME	2012-08-28	100	99962	55542	61822	98425	51635	50067	0	TRUE	TRUE	TRUE	TRUE	TRUE	556182	freshwater sediment metagenome													2011-01-01T00:00:00Z	GAZ:United States of America	42.06	-71.3776	0.26	0
1622.UPMain.3.4	GGCTAAACTATG	GTGCCAGCMGCCGCGGTAA	Freshwater sediment core slice, Uncas Pond, MA. Aseptically collected subsample.	XXQIITAXX	1622	Biodiversity and functional patterns of microbial assemblages┬áin relation to land-use change in postglacial pond sediment profiles	Alison Berry	Missing: Not provided	ERP016496	16S rRNA	V4	FWD:GTGCCAGCMGCCGCGGTAA; REV:GGACTACHVGGGTWTCTAAT	HiSeq	LBNL-Berkeley	CCME	2012-08-28	100	59409	48999	50319	58345	33426	32747	0	TRUE	TRUE	TRUE	FALSE	FALSE	556182	freshwater sediment metagenome													2011-01-01T00:00:00Z	GAZ:United States of America	42.06	-71.3776	0.04	0
1622.UPMain.40.41B	CGACACGGAGAA	GTGCCAGCMGCCGCGGTAA	Freshwater sediment core slice, Uncas Pond, MA. Aseptically collected subsample.	XXQIITAXX	1622	Biodiversity and functional patterns of microbial assemblages┬áin relation to land-use change in postglacial pond sediment profiles	Alison Berry	Missing: Not provided	ERP016496	16S rRNA	V4	FWD:GTGCCAGCMGCCGCGGTAA; REV:GGACTACHVGGGTWTCTAAT	HiSeq	LBNL-Berkeley	CCME	2012-08-28	100	55954	25746	30420	55355	29238	28013	0	TRUE	TRUE	TRUE	FALSE	FALSE	556182	freshwater sediment metagenome													2011-01-01T00:00:00Z	GAZ:United States of America	42.06	-71.3776	0.41	0
1622.UPMain.43.44	TGACGTAGAACT	GTGCCAGCMGCCGCGGTAA	Freshwater sediment core slice, Uncas Pond, MA. Aseptically collected subsample.	XXQIITAXX	1622	Biodiversity and functional patterns of microbial assemblages┬áin relation to land-use change in postglacial pond sediment profiles	Alison Berry	Missing: Not provided	ERP016496	16S rRNA	V4	FWD:GTGCCAGCMGCCGCGGTAA; REV:GGACTACHVGGGTWTCTAAT	HiSeq	LBNL-Berkeley	CCME	2012-08-28	100	93023	49282	56121	91874	46795	45248	0	TRUE	TRUE	TRUE	FALSE	FALSE	556182	freshwater sediment metagenome													2011-01-01T00:00:00Z	GAZ:United States of America	42.06	-71.3776	0.44	0
1622.UPMain.48.49	GGAATTATCGGT	GTGCCAGCMGCCGCGGTAA	Freshwater sediment core slice, Uncas Pond, MA. Aseptically collected subsample.	XXQIITAXX	1622	Biodiversity and functional patterns of microbial assemblages┬áin relation to land-use change in postglacial pond sediment profiles	Alison Berry	Missing: Not provided	ERP016496	16S rRNA	V4	FWD:GTGCCAGCMGCCGCGGTAA; REV:GGACTACHVGGGTWTCTAAT	HiSeq	LBNL-Berkeley	CCME	2012-08-28	100	101463	47157	55180	100072	53806	52442	0	TRUE	TRUE	TRUE	FALSE	FALSE	556182	freshwater sediment metagenome													2011-01-01T00:00:00Z	GAZ:United States of America	42.06	-71.3776	0.49	0
1622.UPMain.94.95	ATGCCGGTAATA	GTGCCAGCMGCCGCGGTAA	Freshwater sediment core slice, Uncas Pond, MA. Aseptically collected subsample.	XXQIITAXX	1622	Biodiversity and functional patterns of microbial assemblages┬áin relation to land-use change in postglacial pond sediment profiles	Alison Berry	Missing: Not provided	ERP016496	16S rRNA	V4	FWD:GTGCCAGCMGCCGCGGTAA; REV:GGACTACHVGGGTWTCTAAT	HiSeq	LBNL-Berkeley	CCME	2012-08-28	100	68105	30807	38054	67526	37402	35536	0	TRUE	TRUE	TRUE	FALSE	FALSE	556182	freshwater sediment metagenome													2011-01-01T00:00:00Z	GAZ:United States of America	42.06	-71.3776	0.95	0
1622.UPMain.99.100	GGACGTTAACTA	GTGCCAGCMGCCGCGGTAA	Freshwater sediment core slice, Uncas Pond, MA. Aseptically collected subsample.	XXQIITAXX	1622	Biodiversity and functional patterns of microbial assemblages┬áin relation to land-use change in postglacial pond sediment profiles	Alison Berry	Missing: Not provided	ERP016496	16S rRNA	V4	FWD:GTGCCAGCMGCCGCGGTAA; REV:GGACTACHVGGGTWTCTAAT	HiSeq	LBNL-Berkeley	CCME	2012-08-28	100	86398	37058	46462	85635	48636	46355	0	TRUE	TRUE	TRUE	TRUE	TRUE	556182	freshwater sediment metagenome													2011-01-01T00:00:00Z	GAZ:United States of America	42.06	-71.3776	1	0
1622.UPSub.14.15	AGTCGAACGAGG	GTGCCAGCMGCCGCGGTAA	Freshwater sediment core slice, Uncas Pond, MA. Aseptically collected subsample.	XXQIITAXX	1622	Biodiversity and functional patterns of microbial assemblages┬áin relation to land-use change in postglacial pond sediment profiles	Alison Berry	Missing: Not provided	ERP016496	16S rRNA	V4	FWD:GTGCCAGCMGCCGCGGTAA; REV:GGACTACHVGGGTWTCTAAT	HiSeq	LBNL-Berkeley	CCME	2012-08-28	100	80352	50050	54105	79071	39945	38756	0	TRUE	TRUE	TRUE	TRUE	FALSE	556182	freshwater sediment metagenome													2011-01-01T00:00:00Z	GAZ:United States of America	42.06	-71.3776	0.15	0
1622.UPSub.18.19	GTGGAGTCTCAT	GTGCCAGCMGCCGCGGTAA	Freshwater sediment core slice, Uncas Pond, MA. Aseptically collected subsample.	XXQIITAXX	1622	Biodiversity and functional patterns of microbial assemblages┬áin relation to land-use change in postglacial pond sediment profiles	Alison Berry	Missing: Not provided	ERP016496	16S rRNA	V4	FWD:GTGCCAGCMGCCGCGGTAA; REV:GGACTACHVGGGTWTCTAAT	HiSeq	LBNL-Berkeley	CCME	2012-08-28	100	88678	49425	54823	87487	44747	43274	0	TRUE	TRUE	TRUE	FALSE	FALSE	556182	freshwater sediment metagenome													2011-01-01T00:00:00Z	GAZ:United States of America	42.06	-71.3776	0.19	0
1622.UPSub.53.54	CATTATGGCGTG	GTGCCAGCMGCCGCGGTAA	Freshwater sediment core slice, Uncas Pond, MA. Aseptically collected subsample.	XXQIITAXX	1622	Biodiversity and functional patterns of microbial assemblages┬áin relation to land-use change in postglacial pond sediment profiles	Alison Berry	Missing: Not provided	ERP016496	16S rRNA	V4	FWD:GTGCCAGCMGCCGCGGTAA; REV:GGACTACHVGGGTWTCTAAT	HiSeq	LBNL-Berkeley	CCME	2012-08-28	100	104242	45668	55638	103181	55261	53253	0	TRUE	TRUE	TRUE	TRUE	FALSE	556182	freshwater sediment metagenome													2011-01-01T00:00:00Z	GAZ:United States of America	42.06	-71.3776	0.54	0
1622.UPSub.67.68	TAGGCATGCTTG	GTGCCAGCMGCCGCGGTAA	Freshwater sediment core slice, Uncas Pond, MA. Aseptically collected subsample.	XXQIITAXX	1622	Biodiversity and functional patterns of microbial assemblages┬áin relation to land-use change in postglacial pond sediment profiles	Alison Berry	Missing: Not provided	ERP016496	16S rRNA	V4	FWD:GTGCCAGCMGCCGCGGTAA; REV:GGACTACHVGGGTWTCTAAT	HiSeq	LBNL-Berkeley	CCME	2012-08-28	100	80554	36020	44478	79745	43231	41119	0	TRUE	TRUE	TRUE	FALSE	FALSE	556182	freshwater sediment metagenome													2011-01-01T00:00:00Z	GAZ:United States of America	42.06	-71.3776	0.68	0
1622.UPSub.81.82	GAAGCTTGAATC	GTGCCAGCMGCCGCGGTAA	Freshwater sediment core slice, Uncas Pond, MA. Aseptically collected subsample.	XXQIITAXX	1622	Biodiversity and functional patterns of microbial assemblages┬áin relation to land-use change in postglacial pond sediment profiles	Alison Berry	Missing: Not provided	ERP016496	16S rRNA	V4	FWD:GTGCCAGCMGCCGCGGTAA; REV:GGACTACHVGGGTWTCTAAT	HiSeq	LBNL-Berkeley	CCME	2012-08-28	100	104411	43549	54939	103347	54929	51832	0	TRUE	TRUE	TRUE	FALSE	FALSE	556182	freshwater sediment metagenome													2011-01-01T00:00:00Z	GAZ:United States of America	42.06	-71.3776	0.82	0
1622.UPSub.99.100	CGAGGGAAAGTC	GTGCCAGCMGCCGCGGTAA	Freshwater sediment core slice, Uncas Pond, MA. Aseptically collected subsample.	XXQIITAXX	1622	Biodiversity and functional patterns of microbial assemblages┬áin relation to land-use change in postglacial pond sediment profiles	Alison Berry	Missing: Not provided	ERP016496	16S rRNA	V4	FWD:GTGCCAGCMGCCGCGGTAA; REV:GGACTACHVGGGTWTCTAAT	HiSeq	LBNL-Berkeley	CCME	2012-08-28	100	79149	34623	43736	78450	44390	42036	0	TRUE	TRUE	TRUE	TRUE	FALSE	556182	freshwater sediment metagenome													2011-01-01T00:00:00Z	GAZ:United States of America	42.06	-71.3776	1	0
1627.RWC	TGCTTCCAATTC	GTGCCAGCMGCCGCGGTAA	Ranwu Co lake sediment	RWC	1627	Geographic distance and pH drive bacterial distribution in alkaline lake sediments across Tibetan Plateau	Haiyan Chu	10.1111/j.1462-2920.2012.02799.x	ERP016880	16S rRNA	V4	FWD:GTGCCAGCMGCCGCGGTAA; REV:GGACTACHVGGGTWTCTAAT	HiSeq	LBNL-Berkeley	CCME	2012-08-28	100	78263	62674	65284	75612	44451	44226	0	TRUE	TRUE	TRUE	TRUE	TRUE	749907	sediment metagenome													2011-01-01T00:00:00Z	GAZ:China	29.45	96.79	0.025	0
1627.SMXC	TCGCGCAACTGT	GTGCCAGCMGCCGCGGTAA	Sumxi Co lake sediment	SMXC	1627	Geographic distance and pH drive bacterial distribution in alkaline lake sediments across Tibetan Plateau	Haiyan Chu	10.1111/j.1462-2920.2012.02799.x	ERP016880	16S rRNA	V4	FWD:GTGCCAGCMGCCGCGGTAA; REV:GGACTACHVGGGTWTCTAAT	HiSeq	LBNL-Berkeley	CCME	2012-08-28	100	79170	60620	64256	76826	50935	49145	0	TRUE	TRUE	TRUE	TRUE	TRUE	749907	sediment metagenome													2011-01-01T00:00:00Z	GAZ:China	34.6	80.25	0.025	0
1642.MS00040	GCCCTATCTTCT	GTGCCAGCMGCCGCGGTAA	Bulk soil kasalath	MS00040	1642	Microbial community of the bulk soil and rhizosphere of rice plants over its lifecycle	Jose Clemente	Missing: Not provided	ERP016900	16S rRNA	V4	FWD:GTGCCAGCMGCCGCGGTAA; REV:GGACTACHVGGGTWTCTAAT	HiSeq	NIG-Japan	CCME	2012-12-17	100	200007	67191	69751	194670	39674	40127	0	TRUE	TRUE	FALSE	FALSE	FALSE	410658	soil metagenome	4530	rice	rice	Oryza sativa	sk__Eukaryota	k__Viridiplantae	p__Streptophyta	c__Liliopsida	o__Poales	f__Poaceae	g__Oryza	s__Oryza_sativa	2011-06-16T00:00:00Z	GAZ:Japan	35.117	138.937		0
1642.MS00042	GGCTCAGATTCC	GTGCCAGCMGCCGCGGTAA	Bulk soil W106	MS00042	1642	Microbial community of the bulk soil and rhizosphere of rice plants over its lifecycle	Jose Clemente	Missing: Not provided	ERP016900	16S rRNA	V4	FWD:GTGCCAGCMGCCGCGGTAA; REV:GGACTACHVGGGTWTCTAAT	HiSeq	NIG-Japan	CCME	2012-12-17	100	126154	94544	98456	124174	53948	54825	0	TRUE	TRUE	FALSE	FALSE	FALSE	410658	soil metagenome	4530	rice	rice	Oryza sativa	sk__Eukaryota	k__Viridiplantae	p__Streptophyta	c__Liliopsida	o__Poales	f__Poaceae	g__Oryza	s__Oryza_sativa	2011-06-16T00:00:00Z	GAZ:Japan	35.117	138.937		0
1642.MS00069	ACGGTTTCTGGA	GTGCCAGCMGCCGCGGTAA	Bulk soil Nipponbare	MS00069	1642	Microbial community of the bulk soil and rhizosphere of rice plants over its lifecycle	Jose Clemente	Missing: Not provided	ERP016900	16S rRNA	V4	FWD:GTGCCAGCMGCCGCGGTAA; REV:GGACTACHVGGGTWTCTAAT	HiSeq	NIG-Japan	CCME	2012-12-17	100	151277	115729	120002	149505	66905	67721	0	TRUE	TRUE	TRUE	FALSE	FALSE	410658	soil metagenome	4530	rice	rice	Oryza sativa	sk__Eukaryota	k__Viridiplantae	p__Streptophyta	c__Liliopsida	o__Poales	f__Poaceae	g__Oryza	s__Oryza_sativa	2011-06-22T00:00:00Z	GAZ:Japan	35.117	138.937		0
1642.MS00084	TTGGTGCCTGTG	GTGCCAGCMGCCGCGGTAA	Bulk soil 93-11	MS00084	1642	Microbial community of the bulk soil and rhizosphere of rice plants over its lifecycle	Jose Clemente	Missing: Not provided	ERP016900	16S rRNA	V4	FWD:GTGCCAGCMGCCGCGGTAA; REV:GGACTACHVGGGTWTCTAAT	HiSeq	NIG-Japan	CCME	2012-12-17	100	72667	55581	57864	71763	32311	32434	0	TRUE	TRUE	FALSE	FALSE	FALSE	410658	soil metagenome	4530	rice	rice	Oryza sativa	sk__Eukaryota	k__Viridiplantae	p__Streptophyta	c__Liliopsida	o__Poales	f__Poaceae	g__Oryza	s__Oryza_sativa	2011-06-29T00:00:00Z	GAZ:Japan	35.117	138.937		0
1642.MS00114	AGTCGTGCACAT	GTGCCAGCMGCCGCGGTAA	Bulk soil W1514	MS00114	1642	Microbial community of the bulk soil and rhizosphere of rice plants over its lifecycle	Jose Clemente	Missing: Not provided	ERP016900	16S rRNA	V4	FWD:GTGCCAGCMGCCGCGGTAA; REV:GGACTACHVGGGTWTCTAAT	HiSeq	NIG-Japan	CCME	2012-12-17	100	130298	98527	102310	128660	56907	57574	0	TRUE	TRUE	FALSE	FALSE	FALSE	410658	soil metagenome	4530	rice	rice	Oryza sativa	sk__Eukaryota	k__Viridiplantae	p__Streptophyta	c__Liliopsida	o__Poales	f__Poaceae	g__Oryza	s__Oryza_sativa	2011-06-29T00:00:00Z	GAZ:Japan	35.117	138.937		0
1642.MS00178	TTGCGTTAGCAG	GTGCCAGCMGCCGCGGTAA	Bulk soil W1514	MS00178	1642	Microbial community of the bulk soil and rhizosphere of rice plants over its lifecycle	Jose Clemente	Missing: Not provided	ERP016900	16S rRNA	V4	FWD:GTGCCAGCMGCCGCGGTAA; REV:GGACTACHVGGGTWTCTAAT	HiSeq	NIG-Japan	CCME	2012-12-17	100	103095	77251	80392	101690	46353	46533	0	TRUE	TRUE	FALSE	FALSE	FALSE	410658	soil metagenome	4530	rice	rice	Oryza sativa	sk__Eukaryota	k__Viridiplantae	p__Streptophyta	c__Liliopsida	o__Poales	f__Poaceae	g__Oryza	s__Oryza_sativa	2011-07-13T00:00:00Z	GAZ:Japan	35.117	138.937		0
1642.MS00206	GCTTGAGCTTGA	GTGCCAGCMGCCGCGGTAA	Bulk soil 93-11	MS00206	1642	Microbial community of the bulk soil and rhizosphere of rice plants over its lifecycle	Jose Clemente	Missing: Not provided	ERP016900	16S rRNA	V4	FWD:GTGCCAGCMGCCGCGGTAA; REV:GGACTACHVGGGTWTCTAAT	HiSeq	NIG-Japan	CCME	2012-12-17	100	240170	171576	178983	235201	98928	100138	0	TRUE	TRUE	FALSE	FALSE	FALSE	410658	soil metagenome	4530	rice	rice	Oryza sativa	sk__Eukaryota	k__Viridiplantae	p__Streptophyta	c__Liliopsida	o__Poales	f__Poaceae	g__Oryza	s__Oryza_sativa	2011-07-27T00:00:00Z	GAZ:Japan	35.117	138.937		0
1642.MS00221	TGGGTCCCACAT	GTGCCAGCMGCCGCGGTAA	Bulk soil kasalath	MS00221	1642	Microbial community of the bulk soil and rhizosphere of rice plants over its lifecycle	Jose Clemente	Missing: Not provided	ERP016900	16S rRNA	V4	FWD:GTGCCAGCMGCCGCGGTAA; REV:GGACTACHVGGGTWTCTAAT	HiSeq	NIG-Japan	CCME	2012-12-17	100	113149	82589	86057	111618	53563	53901	0	TRUE	TRUE	FALSE	FALSE	FALSE	410658	soil metagenome	4530	rice	rice	Oryza sativa	sk__Eukaryota	k__Viridiplantae	p__Streptophyta	c__Liliopsida	o__Poales	f__Poaceae	g__Oryza	s__Oryza_sativa	2011-07-27T00:00:00Z	GAZ:Japan	35.117	138.937		0
1642.MS00224	GAGAGCAACAGA	GTGCCAGCMGCCGCGGTAA	Bulk soil W106	MS00224	1642	Microbial community of the bulk soil and rhizosphere of rice plants over its lifecycle	Jose Clemente	Missing: Not provided	ERP016900	16S rRNA	V4	FWD:GTGCCAGCMGCCGCGGTAA; REV:GGACTACHVGGGTWTCTAAT	HiSeq	NIG-Japan	CCME	2012-12-17	100	80611	60028	62536	79377	38283	38064	0	TRUE	TRUE	FALSE	FALSE	FALSE	410658	soil metagenome	4530	rice	rice	Oryza sativa	sk__Eukaryota	k__Viridiplantae	p__Streptophyta	c__Liliopsida	o__Poales	f__Poaceae	g__Oryza	s__Oryza_sativa	2011-07-27T00:00:00Z	GAZ:Japan	35.117	138.937		0
1642.MS00235	ACGACTGCATAA	GTGCCAGCMGCCGCGGTAA	Bulk soil W1514	MS00235	1642	Microbial community of the bulk soil and rhizosphere of rice plants over its lifecycle	Jose Clemente	Missing: Not provided	ERP016900	16S rRNA	V4	FWD:GTGCCAGCMGCCGCGGTAA; REV:GGACTACHVGGGTWTCTAAT	HiSeq	NIG-Japan	CCME	2012-12-17	100	140907	104791	109417	139228	64820	65428	0	TRUE	TRUE	FALSE	FALSE	FALSE	410658	soil metagenome	4530	rice	rice	Oryza sativa	sk__Eukaryota	k__Viridiplantae	p__Streptophyta	c__Liliopsida	o__Poales	f__Poaceae	g__Oryza	s__Oryza_sativa	2011-07-27T00:00:00Z	GAZ:Japan	35.117	138.937		0
1642.MS00315	AATGACCTCGTG	GTGCCAGCMGCCGCGGTAA	Bulk soil W1514	MS00315	1642	Microbial community of the bulk soil and rhizosphere of rice plants over its lifecycle	Jose Clemente	Missing: Not provided	ERP016900	16S rRNA	V4	FWD:GTGCCAGCMGCCGCGGTAA; REV:GGACTACHVGGGTWTCTAAT	HiSeq	NIG-Japan	CCME	2012-12-17	100	193051	137208	143537	190550	81888	83187	0	TRUE	TRUE	FALSE	FALSE	FALSE	410658	soil metagenome	4530	rice	rice	Oryza sativa	sk__Eukaryota	k__Viridiplantae	p__Streptophyta	c__Liliopsida	o__Poales	f__Poaceae	g__Oryza	s__Oryza_sativa	2011-08-24T00:00:00Z	GAZ:Japan	35.117	138.937		0
1642.MS00491	GTCACATCACGA	GTGCCAGCMGCCGCGGTAA	rhizosphere W1514	MS00491	1642	Microbial community of the bulk soil and rhizosphere of rice plants over its lifecycle	Jose Clemente	Missing: Not provided	ERP016900	16S rRNA	V4	FWD:GTGCCAGCMGCCGCGGTAA; REV:GGACTACHVGGGTWTCTAAT	HiSeq	NIG-Japan	CCME	2012-12-17	100	161376	110376	115211	150818	64485	64816	0	TRUE	TRUE	TRUE	TRUE	FALSE	939928	rhizosphere metagenome	4530	rice	rice	Oryza sativa	sk__Eukaryota	k__Viridiplantae	p__Streptophyta	c__Liliopsida	o__Poales	f__Poaceae	g__Oryza	s__Oryza_sativa	2011-07-13T00:00:00Z	GAZ:Japan	35.117	138.937		0
1642.MS00524	CCTAGTAAGCTG	GTGCCAGCMGCCGCGGTAA	rhizosphere 93-11	MS00524	1642	Microbial community of the bulk soil and rhizosphere of rice plants over its lifecycle	Jose Clemente	Missing: Not provided	ERP016900	16S rRNA	V4	FWD:GTGCCAGCMGCCGCGGTAA; REV:GGACTACHVGGGTWTCTAAT	HiSeq	NIG-Japan	CCME	2012-12-17	100	151308	108027	112846	148925	64252	64821	0	TRUE	TRUE	TRUE	TRUE	FALSE	939928	rhizosphere metagenome	4530	rice	rice	Oryza sativa	sk__Eukaryota	k__Viridiplantae	p__Streptophyta	c__Liliopsida	o__Poales	f__Poaceae	g__Oryza	s__Oryza_sativa	2011-07-27T00:00:00Z	GAZ:Japan	35.117	138.937		0
1642.MS00546	AACTGTTCGCGC	GTGCCAGCMGCCGCGGTAA	rhizosphere W106	MS00546	1642	Microbial community of the bulk soil and rhizosphere of rice plants over its lifecycle	Jose Clemente	Missing: Not provided	ERP016900	16S rRNA	V4	FWD:GTGCCAGCMGCCGCGGTAA; REV:GGACTACHVGGGTWTCTAAT	HiSeq	NIG-Japan	CCME	2012-12-17	100	137861	103376	107190	135686	59828	59862	0	TRUE	TRUE	TRUE	TRUE	TRUE	939928	rhizosphere metagenome	4530	rice	rice	Oryza sativa	sk__Eukaryota	k__Viridiplantae	p__Streptophyta	c__Liliopsida	o__Poales	f__Poaceae	g__Oryza	s__Oryza_sativa	2011-07-27T00:00:00Z	GAZ:Japan	35.117	138.937		0
1642.MS00551	AGCGCTCACATC	GTGCCAGCMGCCGCGGTAA	rhizosphere W1514	MS00551	1642	Microbial community of the bulk soil and rhizosphere of rice plants over its lifecycle	Jose Clemente	Missing: Not provided	ERP016900	16S rRNA	V4	FWD:GTGCCAGCMGCCGCGGTAA; REV:GGACTACHVGGGTWTCTAAT	HiSeq	NIG-Japan	CCME	2012-12-17	100	146501	108693	112530	144549	65356	65878	0	TRUE	TRUE	TRUE	TRUE	TRUE	939928	rhizosphere metagenome	4530	rice	rice	Oryza sativa	sk__Eukaryota	k__Viridiplantae	p__Streptophyta	c__Liliopsida	o__Poales	f__Poaceae	g__Oryza	s__Oryza_sativa	2011-07-27T00:00:00Z	GAZ:Japan	35.117	138.937		0
1642.MS00553	CTCATCATGTTC	GTGCCAGCMGCCGCGGTAA	rhizosphere W1514	MS00553	1642	Microbial community of the bulk soil and rhizosphere of rice plants over its lifecycle	Jose Clemente	Missing: Not provided	ERP016900	16S rRNA	V4	FWD:GTGCCAGCMGCCGCGGTAA; REV:GGACTACHVGGGTWTCTAAT	HiSeq	NIG-Japan	CCME	2012-12-17	100	120144	85645	90268	118374	55111	55351	0	TRUE	TRUE	TRUE	TRUE	FALSE	939928	rhizosphere metagenome	4530	rice	rice	Oryza sativa	sk__Eukaryota	k__Viridiplantae	p__Streptophyta	c__Liliopsida	o__Poales	f__Poaceae	g__Oryza	s__Oryza_sativa	2011-07-27T00:00:00Z	GAZ:Japan	35.117	138.937		0
1642.MS00557	TGACCGGCTGTT	GTGCCAGCMGCCGCGGTAA	rhizosphere W1514	MS00557	1642	Microbial community of the bulk soil and rhizosphere of rice plants over its lifecycle	Jose Clemente	Missing: Not provided	ERP016900	16S rRNA	V4	FWD:GTGCCAGCMGCCGCGGTAA; REV:GGACTACHVGGGTWTCTAAT	HiSeq	NIG-Japan	CCME	2012-12-17	100	86174	63543	65977	85005	37410	37614	0	TRUE	TRUE	TRUE	TRUE	FALSE	939928	rhizosphere metagenome	4530	rice	rice	Oryza sativa	sk__Eukaryota	k__Viridiplantae	p__Streptophyta	c__Liliopsida	o__Poales	f__Poaceae	g__Oryza	s__Oryza_sativa	2011-07-27T00:00:00Z	GAZ:Japan	35.117	138.937		0
1642.MS00586	CGATGAATATCG	GTGCCAGCMGCCGCGGTAA	rhizosphere Nipponbare	MS00586	1642	Microbial community of the bulk soil and rhizosphere of rice plants over its lifecycle	Jose Clemente	Missing: Not provided	ERP016900	16S rRNA	V4	FWD:GTGCCAGCMGCCGCGGTAA; REV:GGACTACHVGGGTWTCTAAT	HiSeq	NIG-Japan	CCME	2012-12-17	100	298277	202616	213395	291676	128569	130136	0	TRUE	TRUE	TRUE	TRUE	FALSE	939928	rhizosphere metagenome	4530	rice	rice	Oryza sativa	sk__Eukaryota	k__Viridiplantae	p__Streptophyta	c__Liliopsida	o__Poales	f__Poaceae	g__Oryza	s__Oryza_sativa	2011-08-17T00:00:00Z	GAZ:Japan	35.117	138.937		0
1642.MS00591	ATCAGAGCCCAT	GTGCCAGCMGCCGCGGTAA	rhizosphere Nipponbare	MS00591	1642	Microbial community of the bulk soil and rhizosphere of rice plants over its lifecycle	Jose Clemente	Missing: Not provided	ERP016900	16S rRNA	V4	FWD:GTGCCAGCMGCCGCGGTAA; REV:GGACTACHVGGGTWTCTAAT	HiSeq	NIG-Japan	CCME	2012-12-17	100	108430	80424	83724	106365	45315	45990	0	TRUE	TRUE	TRUE	TRUE	TRUE	939928	rhizosphere metagenome	4530	rice	rice	Oryza sativa	sk__Eukaryota	k__Viridiplantae	p__Streptophyta	c__Liliopsida	o__Poales	f__Poaceae	g__Oryza	s__Oryza_sativa	2011-08-24T00:00:00Z	GAZ:Japan	35.117	138.937		0
1642.MS00604	GACGCTTTGCTG	GTGCCAGCMGCCGCGGTAA	rhizosphere 93-11	MS00604	1642	Microbial community of the bulk soil and rhizosphere of rice plants over its lifecycle	Jose Clemente	Missing: Not provided	ERP016900	16S rRNA	V4	FWD:GTGCCAGCMGCCGCGGTAA; REV:GGACTACHVGGGTWTCTAAT	HiSeq	NIG-Japan	CCME	2012-12-17	100	126755	93513	97622	125173	55253	56030	0	TRUE	TRUE	TRUE	TRUE	FALSE	939928	rhizosphere metagenome	4530	rice	rice	Oryza sativa	sk__Eukaryota	k__Viridiplantae	p__Streptophyta	c__Liliopsida	o__Poales	f__Poaceae	g__Oryza	s__Oryza_sativa	2011-08-24T00:00:00Z	GAZ:Japan	35.117	138.937		0
1642.MS00634	GAACTTTAGCGC	GTGCCAGCMGCCGCGGTAA	rhizosphere W1514	MS00634	1642	Microbial community of the bulk soil and rhizosphere of rice plants over its lifecycle	Jose Clemente	Missing: Not provided	ERP016900	16S rRNA	V4	FWD:GTGCCAGCMGCCGCGGTAA; REV:GGACTACHVGGGTWTCTAAT	HiSeq	NIG-Japan	CCME	2012-12-17	100	146827	109185	113845	144369	66668	66615	0	TRUE	TRUE	TRUE	FALSE	FALSE	939928	rhizosphere metagenome	4530	rice	rice	Oryza sativa	sk__Eukaryota	k__Viridiplantae	p__Streptophyta	c__Liliopsida	o__Poales	f__Poaceae	g__Oryza	s__Oryza_sativa	2011-08-24T00:00:00Z	GAZ:Japan	35.117	138.937		0
1674.McG.G110715Ly2	TAAACCTGGACA	GTGCCAGCMGCCGCGGTAA	NYC green roofs soil in Staten Island	McG.G110715Ly2	1674	Urban stress is associated with variation in microbial species composition--but not richness--in Manhattan	Krista McGuire	10.1038/ismej.2015.152	ERP016925	16S rRNA	V4	FWD:GTGCCAGCMGCCGCGGTAA; REV:GGACTACHVGGGTWTCTAAT	MiSeq	ANL-Chicago	ANL	2013-10-02	151	23269	16470	17898	22130	12309	12451	10632	TRUE	TRUE	FALSE	FALSE	FALSE	410658	soil metagenome													2012-07-11T00:00:00Z	GAZ:United States of America	40.638	-74.074	0.0003	0
1674.McG.G110719Di4	ATTCAGATGGCA	GTGCCAGCMGCCGCGGTAA	NYC green roofs soil in Manhattan	McG.G110719Di4	1674	Urban stress is associated with variation in microbial species composition--but not richness--in Manhattan	Krista McGuire	10.1038/ismej.2015.152	ERP016925	16S rRNA	V4	FWD:GTGCCAGCMGCCGCGGTAA; REV:GGACTACHVGGGTWTCTAAT	MiSeq	ANL-Chicago	ANL	2013-10-02	151	25643	16223	17873	23376	12702	12660	10242	TRUE	TRUE	FALSE	FALSE	FALSE	410658	soil metagenome													2012-07-11T00:00:00Z	GAZ:United States of America	40.809	-73.963	0.0003	0
1674.McG.P110714Ch2	GAGGCTGATTTA	GTGCCAGCMGCCGCGGTAA	NYC park soil in Manhattan	McG.P110714Ch2	1674	Urban stress is associated with variation in microbial species composition--but not richness--in Manhattan	Krista McGuire	10.1038/ismej.2015.152	ERP016925	16S rRNA	V4	FWD:GTGCCAGCMGCCGCGGTAA; REV:GGACTACHVGGGTWTCTAAT	MiSeq	ANL-Chicago	ANL	2013-10-02	151	25303	17555	19374	23658	13886	13892	10869	TRUE	TRUE	TRUE	FALSE	FALSE	410658	soil metagenome													2012-07-11T00:00:00Z	GAZ:United States of America	40.748	-74.001	0.0003	0
1674.McG.P110714Ch2	GAGGCTGATTTA	GTGCCAGCMGCCGCGGTAA	NYC park soil in Manhattan	McG.P110714Ch2	1674	Urban stress is associated with variation in microbial species composition--but not richness--in Manhattan	Krista McGuire	10.1038/ismej.2015.152	ERP016925	16S rRNA	V4	FWD:GTGCCAGCMGCCGCGGTAA; REV:GGACTACHVGGGTWTCTAAT	MiSeq	ANL-Chicago	ANL	2013-10-02	151	25303	17555	19374	23658	13886	13892	10869	TRUE	TRUE	TRUE	FALSE	FALSE	410658	soil metagenome													2012-07-11T00:00:00Z	GAZ:United States of America	40.748	-74.001	0.0003	0
1694.St1F4.Pmoss.Jstar.16s.NoIndex.sequences	GTAAATTCAGGC	GTGCCAGCMGCCGCGGTAA	egg.St1F4	EH.38.1B	1694	Starling eggshells from Spain	Juan M. Peralta-Sanchez	Missing: Not provided	ERP016469	16S rRNA	V4	FWD:GTGCCAGCMGCCGCGGTAA; REV:GGACTACHVGGGTWTCTAAT	HiSeq	CCME-Boulder	CCME	2013-02-15	100	217757	138677	140586	216205	101191	98559	0	TRUE	TRUE	FALSE	FALSE	FALSE	410656	organismal metagenomes	38112	starling		Pemphiginae	sk__Eukaryota	k__Metazoa	p__Arthropoda	c__Insecta	o__Hemiptera	f__Pemphigidae	g__	s__	2009-04-19T00:00:00Z	GAZ:Spain	37.2214	-2.94897	0	0
1711.KAM7.3	CCTAGAGAAACT	GTGCCAGCMGCCGCGGTAA	Kenya Agriculture Soil Sample, Farm 7 Plot 3	KAM7.3	1711	Agricultural intensification and the functional capacity of soil microbes on smallholder African farms (Kakamenga, Kenya)	Krista McGuire	10.1111/1365-2664.12416	ERP021540	16S rRNA	V4	FWD:GTGCCAGCMGCCGCGGTAA; REV:GGACTACHVGGGTWTCTAAT	MiSeq	Barnard	CCME	2013	151	39792	27200	29517	37386	21654	21490	17729	TRUE	TRUE	TRUE	FALSE	FALSE	410658	soil metagenome													2012-05-01T00:00:00Z	GAZ:Kenya	0.15	35.52	0.2	0
1716.McG.PAPrS16	CTTGCATACCGG	GTGCCAGCMGCCGCGGTAA	PAPrS16	PAPrS16	1716	Panama soil precipitation gradient	Krista McGuire	10.1007/s00248-011-9973-x*	ERP021544	16S rRNA	V4	FWD:GTGCCAGCMGCCGCGGTAA; REV:GGACTACHVGGGTWTCTAAT	MiSeq	Barnard	CCME	2013	151	20709	12618	13808	17768	9255	8957	6316	TRUE	TRUE	TRUE	FALSE	FALSE	410658	soil metagenome													2010-07-01T00:00:00Z	GAZ:Panama	8.98946	-79.5536	0.1	0
1721.S22M	TTGCCTGGGTCA	GTGCCAGCMGCCGCGGTAA	barley soil sample S22M	S22M	1721	Comparative analysis of the microbial communities in agricultural soil amended with enhanced biochars or traditional fertilisers	Torsten Thomas	10.1016/j.agee.2014.04.006	ERP016937	16S rRNA	V4	FWD:GTGCCAGCMGCCGCGGTAA; REV:GGACTACHVGGGTWTCTAAT	HiSeq	ANL-Chicago	CCME	2014-03-01	138	150229	117048	123868	149032	82414	84146	13659	TRUE	TRUE	FALSE	FALSE	FALSE	410658	soil metagenome													2011-11-16T00:00:00Z	GAZ:Australia	-28.833	153.417	0	0
1747.DZF.6132012.TJ.sunken.tree.stump	TGTCGCAAATAG	GTGCCAGCMGCCGCGGTAA	Tujah sunken tree stump	3	1747	The oral and skin microbiomes of captive Komodo Dragons are significantly shared with their habitat	Rob Knight	10.1128/mSystems.00046-16	ERP016252	16S rRNA	V4	FWD:GTGCCAGCMGCCGCGGTAA; REV:GGACTACHVGGGTWTCTAAT	HiSeq	CCME-Boulder	CCME	2013-03-04	151	70386	43395	45368	57826	34291	34211	28717	TRUE	TRUE	TRUE	TRUE	TRUE	410656	organismal metagenomes	61221		Komodo dragon	Varanus komodoensis	sk__Eukaryota	k__Metazoa	p__Chordata	c__	o__Squamata	f__Varanidae	g__Varanus	s__Varanus_komodoensis	2012-06-13T00:00:00Z	GAZ:United States of America	39.74	-104.98	0	0
2192.H06b.Hand.3271.lane6.NoIndex.L006	GTCAACGCTGTC	GT	H06b.Hand	Person_06.1	2192	Longitudinal analysis of microbial interaction between humans and the indoor environment	Jack Gilbert	10.1126/science.1254529	ERP005806	16S rRNA	V4	FWD:GTGCCAGCMGCCGCGGTAA; REV:GGACTACHVGGGTWTCTAAT	HiSeq	ANL-Chicago	ANL	unknown	151	75233	72262	72400	74932	46522	45642	40558	TRUE	TRUE	FALSE	FALSE	FALSE	539655	human skin metagenome	9606	human	human	Homo sapiens	sk__Eukaryota	k__Metazoa	p__Chordata	c__Mammalia	o__Primates	f__Hominidae	g__Homo	s__Homo_sapiens	2012-03-28T00:00:00Z	GAZ:United States of America	41.88	-87.63	0	0
2382.GM.181.R1.rhizo.10.12.lane7.NoIndex.L007.sequences	ATGCTAACCACG	GTGCCAGCMGCCGCGGTAA	Rhizosphere	HS4	2382	The soil microbiome influences grapevine-associated microbiota (HiSeq)	Jack Gilbert	10.1128/mBio.02527-14	ERP006348	16S rRNA	V4	FWD:GTGCCAGCMGCCGCGGTAA; REV:GGACTACHVGGGTWTCTAAT	HiSeq	ANL-Chicago	CCME	2013-04-23	150	573988	453170	479444	563389	281018	287981	210155	TRUE	TRUE	TRUE	FALSE	FALSE	939928	rhizosphere metagenome													2012-10-11T00:00:00Z	GAZ:United States of America	45.0131	-0.786197		0
2382.GM.181.R1.rhizo.10.12.lane7.NoIndex.L007.sequences	ATGCTAACCACG	GTGCCAGCMGCCGCGGTAA	Rhizosphere	HS4	2382	The soil microbiome influences grapevine-associated microbiota (HiSeq)	Jack Gilbert	10.1128/mBio.02527-14	ERP006348	16S rRNA	V4	FWD:GTGCCAGCMGCCGCGGTAA; REV:GGACTACHVGGGTWTCTAAT	HiSeq	ANL-Chicago	CCME	2013-04-23	150	573988	453170	479444	563389	281018	287981	210155	TRUE	TRUE	TRUE	FALSE	FALSE	939928	rhizosphere metagenome													2012-10-11T00:00:00Z	GAZ:United States of America	45.0131	-0.786197		0
2382.GM.181.R1.rhizo.10.12.lane7.NoIndex.L007.sequences	ATGCTAACCACG	GTGCCAGCMGCCGCGGTAA	Rhizosphere	HS4	2382	The soil microbiome influences grapevine-associated microbiota (HiSeq)	Jack Gilbert	10.1128/mBio.02527-14	ERP006348	16S rRNA	V4	FWD:GTGCCAGCMGCCGCGGTAA; REV:GGACTACHVGGGTWTCTAAT	HiSeq	ANL-Chicago	CCME	2013-04-23	150	573988	453170	479444	563389	281018	287981	210155	TRUE	TRUE	TRUE	FALSE	FALSE	939928	rhizosphere metagenome													2012-10-11T00:00:00Z	GAZ:United States of America	45.0131	-0.786197		0
2382.GM.181.R2.rhizo.10.12.lane7.NoIndex.L007.sequences	ACCAATCTCGGC	GTGCCAGCMGCCGCGGTAA	Rhizosphere	HS4	2382	The soil microbiome influences grapevine-associated microbiota (HiSeq)	Jack Gilbert	10.1128/mBio.02527-14	ERP006348	16S rRNA	V4	FWD:GTGCCAGCMGCCGCGGTAA; REV:GGACTACHVGGGTWTCTAAT	HiSeq	ANL-Chicago	CCME	2013-04-23	150	565383	459452	482456	556631	275980	283415	212083	TRUE	TRUE	TRUE	TRUE	TRUE	939928	rhizosphere metagenome													2012-10-11T00:00:00Z	GAZ:United States of America	45.0131	-0.786197		0
2382.GM.181.R2.rhizo.10.12.lane7.NoIndex.L007.sequences	ACCAATCTCGGC	GTGCCAGCMGCCGCGGTAA	Rhizosphere	HS4	2382	The soil microbiome influences grapevine-associated microbiota (HiSeq)	Jack Gilbert	10.1128/mBio.02527-14	ERP006348	16S rRNA	V4	FWD:GTGCCAGCMGCCGCGGTAA; REV:GGACTACHVGGGTWTCTAAT	HiSeq	ANL-Chicago	CCME	2013-04-23	150	565383	459452	482456	556631	275980	283415	212083	TRUE	TRUE	TRUE	TRUE	TRUE	939928	rhizosphere metagenome													2012-10-11T00:00:00Z	GAZ:United States of America	45.0131	-0.786197		0
2382.GM.181.R2.rhizo.10.12.lane7.NoIndex.L007.sequences	ACCAATCTCGGC	GTGCCAGCMGCCGCGGTAA	Rhizosphere	HS4	2382	The soil microbiome influences grapevine-associated microbiota (HiSeq)	Jack Gilbert	10.1128/mBio.02527-14	ERP006348	16S rRNA	V4	FWD:GTGCCAGCMGCCGCGGTAA; REV:GGACTACHVGGGTWTCTAAT	HiSeq	ANL-Chicago	CCME	2013-04-23	150	565383	459452	482456	556631	275980	283415	212083	TRUE	TRUE	TRUE	TRUE	TRUE	939928	rhizosphere metagenome													2012-10-11T00:00:00Z	GAZ:United States of America	45.0131	-0.786197		0
2382.GM.181.R2.rhizo.10.12.lane7.NoIndex.L007.sequences	ACCAATCTCGGC	GTGCCAGCMGCCGCGGTAA	Rhizosphere	HS4	2382	The soil microbiome influences grapevine-associated microbiota (HiSeq)	Jack Gilbert	10.1128/mBio.02527-14	ERP006348	16S rRNA	V4	FWD:GTGCCAGCMGCCGCGGTAA; REV:GGACTACHVGGGTWTCTAAT	HiSeq	ANL-Chicago	CCME	2013-04-23	150	565383	459452	482456	556631	275980	283415	212083	TRUE	TRUE	TRUE	TRUE	TRUE	939928	rhizosphere metagenome													2012-10-11T00:00:00Z	GAZ:United States of America	45.0131	-0.786197		0
2382.GM.181.R3.bulk.10.12.lane7.NoIndex.L007.sequences	GAGATCGCCTAT	GTGCCAGCMGCCGCGGTAA	Bulk_soil	HS4	2382	The soil microbiome influences grapevine-associated microbiota (HiSeq)	Jack Gilbert	10.1128/mBio.02527-14	ERP006348	16S rRNA	V4	FWD:GTGCCAGCMGCCGCGGTAA; REV:GGACTACHVGGGTWTCTAAT	HiSeq	ANL-Chicago	CCME	2013-04-23	150	572166	458904	482133	563627	272508	282956	221620	TRUE	TRUE	FALSE	FALSE	FALSE	410658	soil metagenome													2012-10-11T00:00:00Z	GAZ:United States of America	45.0131	-0.786197		0
2382.GM.181.R3.rhizo.10.12.lane7.NoIndex.L007.sequences	TATCCAAGCGCA	GTGCCAGCMGCCGCGGTAA	Rhizosphere	HS4	2382	The soil microbiome influences grapevine-associated microbiota (HiSeq)	Jack Gilbert	10.1128/mBio.02527-14	ERP006348	16S rRNA	V4	FWD:GTGCCAGCMGCCGCGGTAA; REV:GGACTACHVGGGTWTCTAAT	HiSeq	ANL-Chicago	CCME	2013-04-23	150	568818	448904	474545	559095	269254	279410	210690	TRUE	TRUE	TRUE	TRUE	TRUE	939928	rhizosphere metagenome													2012-10-11T00:00:00Z	GAZ:United States of America	45.0131	-0.786197		0
2382.GM.181.R3.rhizo.10.12.lane7.NoIndex.L007.sequences	TATCCAAGCGCA	GTGCCAGCMGCCGCGGTAA	Rhizosphere	HS4	2382	The soil microbiome influences grapevine-associated microbiota (HiSeq)	Jack Gilbert	10.1128/mBio.02527-14	ERP006348	16S rRNA	V4	FWD:GTGCCAGCMGCCGCGGTAA; REV:GGACTACHVGGGTWTCTAAT	HiSeq	ANL-Chicago	CCME	2013-04-23	150	568818	448904	474545	559095	269254	279410	210690	TRUE	TRUE	TRUE	TRUE	TRUE	939928	rhizosphere metagenome													2012-10-11T00:00:00Z	GAZ:United States of America	45.0131	-0.786197		0
2382.GM.181.R3.rhizo.10.12.lane7.NoIndex.L007.sequences	TATCCAAGCGCA	GTGCCAGCMGCCGCGGTAA	Rhizosphere	HS4	2382	The soil microbiome influences grapevine-associated microbiota (HiSeq)	Jack Gilbert	10.1128/mBio.02527-14	ERP006348	16S rRNA	V4	FWD:GTGCCAGCMGCCGCGGTAA; REV:GGACTACHVGGGTWTCTAAT	HiSeq	ANL-Chicago	CCME	2013-04-23	150	568818	448904	474545	559095	269254	279410	210690	TRUE	TRUE	TRUE	TRUE	TRUE	939928	rhizosphere metagenome													2012-10-11T00:00:00Z	GAZ:United States of America	45.0131	-0.786197		0
2382.GM.181.R3.rhizo.10.12.lane7.NoIndex.L007.sequences	TATCCAAGCGCA	GTGCCAGCMGCCGCGGTAA	Rhizosphere	HS4	2382	The soil microbiome influences grapevine-associated microbiota (HiSeq)	Jack Gilbert	10.1128/mBio.02527-14	ERP006348	16S rRNA	V4	FWD:GTGCCAGCMGCCGCGGTAA; REV:GGACTACHVGGGTWTCTAAT	HiSeq	ANL-Chicago	CCME	2013-04-23	150	568818	448904	474545	559095	269254	279410	210690	TRUE	TRUE	TRUE	TRUE	TRUE	939928	rhizosphere metagenome													2012-10-11T00:00:00Z	GAZ:United States of America	45.0131	-0.786197		0
2382.GM.181.R3.rhizo.10.12.lane7.NoIndex.L007.sequences	TATCCAAGCGCA	GTGCCAGCMGCCGCGGTAA	Rhizosphere	HS4	2382	The soil microbiome influences grapevine-associated microbiota (HiSeq)	Jack Gilbert	10.1128/mBio.02527-14	ERP006348	16S rRNA	V4	FWD:GTGCCAGCMGCCGCGGTAA; REV:GGACTACHVGGGTWTCTAAT	HiSeq	ANL-Chicago	CCME	2013-04-23	150	568818	448904	474545	559095	269254	279410	210690	TRUE	TRUE	TRUE	TRUE	TRUE	939928	rhizosphere metagenome													2012-10-11T00:00:00Z	GAZ:United States of America	45.0131	-0.786197		0
2382.GM.181.R3.root.10.12.lane7.NoIndex.L007.sequences	AGGCACAGTAGG	GTGCCAGCMGCCGCGGTAA	Roots	HS4	2382	The soil microbiome influences grapevine-associated microbiota (HiSeq)	Jack Gilbert	10.1128/mBio.02527-14	ERP006348	16S rRNA	V4	FWD:GTGCCAGCMGCCGCGGTAA; REV:GGACTACHVGGGTWTCTAAT	HiSeq	ANL-Chicago	CCME	2013-04-23	150	451222	352125	362985	446808	262853	268253	221313	TRUE	TRUE	TRUE	FALSE	FALSE	1118232	root metagenome													2012-10-11T00:00:00Z	GAZ:United States of America	45.0131	-0.786197		0
2382.GM.181.R4.bulk.10.12.lane7.NoIndex.L007.sequences	TGTACATCGCCG	GTGCCAGCMGCCGCGGTAA	Bulk_soil	HS4	2382	The soil microbiome influences grapevine-associated microbiota (HiSeq)	Jack Gilbert	10.1128/mBio.02527-14	ERP006348	16S rRNA	V4	FWD:GTGCCAGCMGCCGCGGTAA; REV:GGACTACHVGGGTWTCTAAT	HiSeq	ANL-Chicago	CCME	2013-04-23	150	562752	450749	474055	553949	265960	274647	210346	TRUE	TRUE	TRUE	FALSE	FALSE	410658	soil metagenome													2012-10-11T00:00:00Z	GAZ:United States of America	45.0131	-0.786197		0
2382.GM.181.R4.rhizo.10.12.lane7.NoIndex.L007.sequences	GTACTGAAGATC	GTGCCAGCMGCCGCGGTAA	Rhizosphere	HS4	2382	The soil microbiome influences grapevine-associated microbiota (HiSeq)	Jack Gilbert	10.1128/mBio.02527-14	ERP006348	16S rRNA	V4	FWD:GTGCCAGCMGCCGCGGTAA; REV:GGACTACHVGGGTWTCTAAT	HiSeq	ANL-Chicago	CCME	2013-04-23	150	595656	477123	503069	586020	287447	296444	221514	TRUE	TRUE	TRUE	FALSE	FALSE	939928	rhizosphere metagenome													2012-10-11T00:00:00Z	GAZ:United States of America	45.0131	-0.786197		0
2382.GM.181.R4.rhizo.10.12.lane7.NoIndex.L007.sequences	GTACTGAAGATC	GTGCCAGCMGCCGCGGTAA	Rhizosphere	HS4	2382	The soil microbiome influences grapevine-associated microbiota (HiSeq)	Jack Gilbert	10.1128/mBio.02527-14	ERP006348	16S rRNA	V4	FWD:GTGCCAGCMGCCGCGGTAA; REV:GGACTACHVGGGTWTCTAAT	HiSeq	ANL-Chicago	CCME	2013-04-23	150	595656	477123	503069	586020	287447	296444	221514	TRUE	TRUE	TRUE	FALSE	FALSE	939928	rhizosphere metagenome													2012-10-11T00:00:00Z	GAZ:United States of America	45.0131	-0.786197		0
2382.GM.181.R4.rhizo.10.12.lane7.NoIndex.L007.sequences	GTACTGAAGATC	GTGCCAGCMGCCGCGGTAA	Rhizosphere	HS4	2382	The soil microbiome influences grapevine-associated microbiota (HiSeq)	Jack Gilbert	10.1128/mBio.02527-14	ERP006348	16S rRNA	V4	FWD:GTGCCAGCMGCCGCGGTAA; REV:GGACTACHVGGGTWTCTAAT	HiSeq	ANL-Chicago	CCME	2013-04-23	150	595656	477123	503069	586020	287447	296444	221514	TRUE	TRUE	TRUE	FALSE	FALSE	939928	rhizosphere metagenome													2012-10-11T00:00:00Z	GAZ:United States of America	45.0131	-0.786197		0
2382.GM.181.R5.rhizo.10.12.lane7.NoIndex.L007.sequences	TCGCCGTGTACA	GTGCCAGCMGCCGCGGTAA	Rhizosphere	HS4	2382	The soil microbiome influences grapevine-associated microbiota (HiSeq)	Jack Gilbert	10.1128/mBio.02527-14	ERP006348	16S rRNA	V4	FWD:GTGCCAGCMGCCGCGGTAA; REV:GGACTACHVGGGTWTCTAAT	HiSeq	ANL-Chicago	CCME	2013-04-23	150	564280	453347	477729	555496	282880	290648	210647	TRUE	TRUE	TRUE	TRUE	FALSE	939928	rhizosphere metagenome													2012-10-11T00:00:00Z	GAZ:United States of America	45.0131	-0.786197		0
2382.GM.181.R5.rhizo.10.12.lane7.NoIndex.L007.sequences	TCGCCGTGTACA	GTGCCAGCMGCCGCGGTAA	Rhizosphere	HS4	2382	The soil microbiome influences grapevine-associated microbiota (HiSeq)	Jack Gilbert	10.1128/mBio.02527-14	ERP006348	16S rRNA	V4	FWD:GTGCCAGCMGCCGCGGTAA; REV:GGACTACHVGGGTWTCTAAT	HiSeq	ANL-Chicago	CCME	2013-04-23	150	564280	453347	477729	555496	282880	290648	210647	TRUE	TRUE	TRUE	TRUE	FALSE	939928	rhizosphere metagenome													2012-10-11T00:00:00Z	GAZ:United States of America	45.0131	-0.786197		0
2382.GM.181.R5.rhizo.10.12.lane7.NoIndex.L007.sequences	TCGCCGTGTACA	GTGCCAGCMGCCGCGGTAA	Rhizosphere	HS4	2382	The soil microbiome influences grapevine-associated microbiota (HiSeq)	Jack Gilbert	10.1128/mBio.02527-14	ERP006348	16S rRNA	V4	FWD:GTGCCAGCMGCCGCGGTAA; REV:GGACTACHVGGGTWTCTAAT	HiSeq	ANL-Chicago	CCME	2013-04-23	150	564280	453347	477729	555496	282880	290648	210647	TRUE	TRUE	TRUE	TRUE	FALSE	939928	rhizosphere metagenome													2012-10-11T00:00:00Z	GAZ:United States of America	45.0131	-0.786197		0
2382.GM.181.R5.rhizo.10.12.lane7.NoIndex.L007.sequences	TCGCCGTGTACA	GTGCCAGCMGCCGCGGTAA	Rhizosphere	HS4	2382	The soil microbiome influences grapevine-associated microbiota (HiSeq)	Jack Gilbert	10.1128/mBio.02527-14	ERP006348	16S rRNA	V4	FWD:GTGCCAGCMGCCGCGGTAA; REV:GGACTACHVGGGTWTCTAAT	HiSeq	ANL-Chicago	CCME	2013-04-23	150	564280	453347	477729	555496	282880	290648	210647	TRUE	TRUE	TRUE	TRUE	FALSE	939928	rhizosphere metagenome													2012-10-11T00:00:00Z	GAZ:United States of America	45.0131	-0.786197		0
2382.GM.181.R5.root.10.12.lane7.NoIndex.L007.sequences	CTCTTCTGATCA	GTGCCAGCMGCCGCGGTAA	Roots	HS4	2382	The soil microbiome influences grapevine-associated microbiota (HiSeq)	Jack Gilbert	10.1128/mBio.02527-14	ERP006348	16S rRNA	V4	FWD:GTGCCAGCMGCCGCGGTAA; REV:GGACTACHVGGGTWTCTAAT	HiSeq	ANL-Chicago	CCME	2013-04-23	150	558011	489559	498426	552364	321549	325965	272150	TRUE	TRUE	TRUE	TRUE	FALSE	1118232	root metagenome													2012-10-11T00:00:00Z	GAZ:United States of America	45.0131	-0.786197		0
2382.MU002.C3.HA.1.278.root.9.11.lane1.NoIndex.L001.sequences	CTAGCAGTATGA	GTGCCAGCMGCCGCGGTAA	Roots	HS10	2382	The soil microbiome influences grapevine-associated microbiota (HiSeq)	Jack Gilbert	10.1128/mBio.02527-14	ERP006348	16S rRNA	V4	FWD:GTGCCAGCMGCCGCGGTAA; REV:GGACTACHVGGGTWTCTAAT	HiSeq	ANL-Chicago	CCME	2012-08-22	150	109481	70407	77246	107887	62972	64165	52235	TRUE	TRUE	TRUE	TRUE	FALSE	1118232	root metagenome													2011-09-14T00:00:00Z	GAZ:United States of America	41.0628	-72.4031		0
2382.MU002.C3.HA.1.477.rhizo.4.12.lane7.NoIndex.L007.sequences	GGTCTAGGTCTA	GTGCCAGCMGCCGCGGTAA	Rhizosphere	HS10	2382	The soil microbiome influences grapevine-associated microbiota (HiSeq)	Jack Gilbert	10.1128/mBio.02527-14	ERP006348	16S rRNA	V4	FWD:GTGCCAGCMGCCGCGGTAA; REV:GGACTACHVGGGTWTCTAAT	HiSeq	ANL-Chicago	CCME	2013-04-23	150	104020	73959	79581	101938	53057	54947	41260	TRUE	TRUE	TRUE	TRUE	FALSE	939928	rhizosphere metagenome													2012-04-12T00:00:00Z	GAZ:United States of America	41.0628	-72.4503		0
2382.MU002.C3.HA.1.478.root.4.12.lane7.NoIndex.L007.sequences	CAAGTCGAATAC	GTGCCAGCMGCCGCGGTAA	Roots	HS10	2382	The soil microbiome influences grapevine-associated microbiota (HiSeq)	Jack Gilbert	10.1128/mBio.02527-14	ERP006348	16S rRNA	V4	FWD:GTGCCAGCMGCCGCGGTAA; REV:GGACTACHVGGGTWTCTAAT	HiSeq	ANL-Chicago	CCME	2013-04-23	150	137766	94341	104474	136373	82239	85084	70491	TRUE	TRUE	TRUE	TRUE	FALSE	1118232	root metagenome													2012-04-12T00:00:00Z	GAZ:United States of America	41.0628	-72.4503		0
2382.MU002.C3.HA.1.676.bulk.9.12.lane7.NoIndex.L007.sequences	GTCGTGTAGCCT	GTGCCAGCMGCCGCGGTAA	Bulk_soil	HS1	2382	The soil microbiome influences grapevine-associated microbiota (HiSeq)	Jack Gilbert	10.1128/mBio.02527-14	ERP006348	16S rRNA	V4	FWD:GTGCCAGCMGCCGCGGTAA; REV:GGACTACHVGGGTWTCTAAT	HiSeq	ANL-Chicago	CCME	2013-04-23	150	115187	82698	89671	112847	57673	60033	44361	TRUE	TRUE	FALSE	FALSE	FALSE	410658	soil metagenome													2012-09-25T00:00:00Z	GAZ:United States of America	41.0627	-72.4503		0
2382.MU002.C3.HA.1.676.bulk.9.12.lane7.NoIndex.L007.sequences	GTCGTGTAGCCT	GTGCCAGCMGCCGCGGTAA	Bulk_soil	HS1	2382	The soil microbiome influences grapevine-associated microbiota (HiSeq)	Jack Gilbert	10.1128/mBio.02527-14	ERP006348	16S rRNA	V4	FWD:GTGCCAGCMGCCGCGGTAA; REV:GGACTACHVGGGTWTCTAAT	HiSeq	ANL-Chicago	CCME	2013-04-23	150	115187	82698	89671	112847	57673	60033	44361	TRUE	TRUE	FALSE	FALSE	FALSE	410658	soil metagenome													2012-09-25T00:00:00Z	GAZ:United States of America	41.0627	-72.4503		0
2382.MU002.C3.HA.1.676.bulk.9.12.lane7.NoIndex.L007.sequences	GTCGTGTAGCCT	GTGCCAGCMGCCGCGGTAA	Bulk_soil	HS1	2382	The soil microbiome influences grapevine-associated microbiota (HiSeq)	Jack Gilbert	10.1128/mBio.02527-14	ERP006348	16S rRNA	V4	FWD:GTGCCAGCMGCCGCGGTAA; REV:GGACTACHVGGGTWTCTAAT	HiSeq	ANL-Chicago	CCME	2013-04-23	150	115187	82698	89671	112847	57673	60033	44361	TRUE	TRUE	FALSE	FALSE	FALSE	410658	soil metagenome													2012-09-25T00:00:00Z	GAZ:United States of America	41.0627	-72.4503		0
2382.MU002.C3.HA.1.676.bulk.9.12.lane7.NoIndex.L007.sequences	GTCGTGTAGCCT	GTGCCAGCMGCCGCGGTAA	Bulk_soil	HS1	2382	The soil microbiome influences grapevine-associated microbiota (HiSeq)	Jack Gilbert	10.1128/mBio.02527-14	ERP006348	16S rRNA	V4	FWD:GTGCCAGCMGCCGCGGTAA; REV:GGACTACHVGGGTWTCTAAT	HiSeq	ANL-Chicago	CCME	2013-04-23	150	115187	82698	89671	112847	57673	60033	44361	TRUE	TRUE	FALSE	FALSE	FALSE	410658	soil metagenome													2012-09-25T00:00:00Z	GAZ:United States of America	41.0627	-72.4503		0
2382.MU002.C3.HA.1.676.bulk.9.12.lane7.NoIndex.L007.sequences	GTCGTGTAGCCT	GTGCCAGCMGCCGCGGTAA	Bulk_soil	HS1	2382	The soil microbiome influences grapevine-associated microbiota (HiSeq)	Jack Gilbert	10.1128/mBio.02527-14	ERP006348	16S rRNA	V4	FWD:GTGCCAGCMGCCGCGGTAA; REV:GGACTACHVGGGTWTCTAAT	HiSeq	ANL-Chicago	CCME	2013-04-23	150	115187	82698	89671	112847	57673	60033	44361	TRUE	TRUE	FALSE	FALSE	FALSE	410658	soil metagenome													2012-09-25T00:00:00Z	GAZ:United States of America	41.0627	-72.4503		0
2382.MU002.C3.HA.1.677.rhizo.9.12.lane7.NoIndex.L007.sequences	AGCATGTCCCGT	GTGCCAGCMGCCGCGGTAA	Rhizosphere	HS1	2382	The soil microbiome influences grapevine-associated microbiota (HiSeq)	Jack Gilbert	10.1128/mBio.02527-14	ERP006348	16S rRNA	V4	FWD:GTGCCAGCMGCCGCGGTAA; REV:GGACTACHVGGGTWTCTAAT	HiSeq	ANL-Chicago	CCME	2013-04-23	150	108849	77738	84331	107208	57242	59442	45061	TRUE	TRUE	TRUE	TRUE	FALSE	939928	rhizosphere metagenome													2012-09-25T00:00:00Z	GAZ:United States of America	41.0627	-72.4503		0
2382.MU002.C3.HA.1.678.root.9.12.lane7.NoIndex.L007.sequences	ATAGAGGCCATT	GTGCCAGCMGCCGCGGTAA	Roots	HS7	2382	The soil microbiome influences grapevine-associated microbiota (HiSeq)	Jack Gilbert	10.1128/mBio.02527-14	ERP006348	16S rRNA	V4	FWD:GTGCCAGCMGCCGCGGTAA; REV:GGACTACHVGGGTWTCTAAT	HiSeq	ANL-Chicago	CCME	2013-04-23	150	204062	154579	164558	202014	118206	121236	98757	TRUE	TRUE	TRUE	TRUE	FALSE	1118232	root metagenome													2012-09-25T00:00:00Z	GAZ:United States of America	41.0627	-72.4503		0
2382.MU002.C3.HA.2.482.rhizo.4.12.lane7.NoIndex.L007.sequences	GAATATACCTGG	GTGCCAGCMGCCGCGGTAA	Rhizosphere	HS10	2382	The soil microbiome influences grapevine-associated microbiota (HiSeq)	Jack Gilbert	10.1128/mBio.02527-14	ERP006348	16S rRNA	V4	FWD:GTGCCAGCMGCCGCGGTAA; REV:GGACTACHVGGGTWTCTAAT	HiSeq	ANL-Chicago	CCME	2013-04-23	150	105657	75470	81167	103602	53179	55493	41676	TRUE	TRUE	TRUE	TRUE	FALSE	939928	rhizosphere metagenome													2012-04-12T00:00:00Z	GAZ:United States of America	41.0628	-72.4503		0
2382.MU002.C3.HA.2.482.rhizo.4.12.r1.lane7.NoIndex.L007.sequences	GAGCCATCTGTA	GTGCCAGCMGCCGCGGTAA	Rhizosphere	HS1	2382	The soil microbiome influences grapevine-associated microbiota (HiSeq)	Jack Gilbert	10.1128/mBio.02527-14	ERP006348	16S rRNA	V4	FWD:GTGCCAGCMGCCGCGGTAA; REV:GGACTACHVGGGTWTCTAAT	HiSeq	ANL-Chicago	CCME	2013-04-23	150	105449	74873	80780	103758	55801	57951	42618	TRUE	TRUE	TRUE	FALSE	FALSE	939928	rhizosphere metagenome													2012-04-12T00:00:00Z	GAZ:United States of America	41.0628	-72.4503		0
2382.MU002.C3.HA.2.681.bulk.9.12.lane7.NoIndex.L007.sequences	AATTGTGTCGGA	GTGCCAGCMGCCGCGGTAA	Bulk_soil	HS1	2382	The soil microbiome influences grapevine-associated microbiota (HiSeq)	Jack Gilbert	10.1128/mBio.02527-14	ERP006348	16S rRNA	V4	FWD:GTGCCAGCMGCCGCGGTAA; REV:GGACTACHVGGGTWTCTAAT	HiSeq	ANL-Chicago	CCME	2013-04-23	150	106688	75798	82093	104768	54577	56781	42067	TRUE	TRUE	FALSE	FALSE	FALSE	410658	soil metagenome													2012-09-25T00:00:00Z	GAZ:United States of America	41.0627	-72.4503		0
2382.MU002.C3.HA.2.681.bulk.9.12.lane7.NoIndex.L007.sequences	AATTGTGTCGGA	GTGCCAGCMGCCGCGGTAA	Bulk_soil	HS1	2382	The soil microbiome influences grapevine-associated microbiota (HiSeq)	Jack Gilbert	10.1128/mBio.02527-14	ERP006348	16S rRNA	V4	FWD:GTGCCAGCMGCCGCGGTAA; REV:GGACTACHVGGGTWTCTAAT	HiSeq	ANL-Chicago	CCME	2013-04-23	150	106688	75798	82093	104768	54577	56781	42067	TRUE	TRUE	FALSE	FALSE	FALSE	410658	soil metagenome													2012-09-25T00:00:00Z	GAZ:United States of America	41.0627	-72.4503		0
2382.MU002.C3.HA.2.681.bulk.9.12.lane7.NoIndex.L007.sequences	AATTGTGTCGGA	GTGCCAGCMGCCGCGGTAA	Bulk_soil	HS1	2382	The soil microbiome influences grapevine-associated microbiota (HiSeq)	Jack Gilbert	10.1128/mBio.02527-14	ERP006348	16S rRNA	V4	FWD:GTGCCAGCMGCCGCGGTAA; REV:GGACTACHVGGGTWTCTAAT	HiSeq	ANL-Chicago	CCME	2013-04-23	150	106688	75798	82093	104768	54577	56781	42067	TRUE	TRUE	FALSE	FALSE	FALSE	410658	soil metagenome													2012-09-25T00:00:00Z	GAZ:United States of America	41.0627	-72.4503		0
2382.MU002.C3.HA.2.681.bulk.9.12.lane7.NoIndex.L007.sequences	AATTGTGTCGGA	GTGCCAGCMGCCGCGGTAA	Bulk_soil	HS1	2382	The soil microbiome influences grapevine-associated microbiota (HiSeq)	Jack Gilbert	10.1128/mBio.02527-14	ERP006348	16S rRNA	V4	FWD:GTGCCAGCMGCCGCGGTAA; REV:GGACTACHVGGGTWTCTAAT	HiSeq	ANL-Chicago	CCME	2013-04-23	150	106688	75798	82093	104768	54577	56781	42067	TRUE	TRUE	FALSE	FALSE	FALSE	410658	soil metagenome													2012-09-25T00:00:00Z	GAZ:United States of America	41.0627	-72.4503		0
2382.MU002.C3.HA.2.681.bulk.9.12.lane7.NoIndex.L007.sequences	AATTGTGTCGGA	GTGCCAGCMGCCGCGGTAA	Bulk_soil	HS1	2382	The soil microbiome influences grapevine-associated microbiota (HiSeq)	Jack Gilbert	10.1128/mBio.02527-14	ERP006348	16S rRNA	V4	FWD:GTGCCAGCMGCCGCGGTAA; REV:GGACTACHVGGGTWTCTAAT	HiSeq	ANL-Chicago	CCME	2013-04-23	150	106688	75798	82093	104768	54577	56781	42067	TRUE	TRUE	FALSE	FALSE	FALSE	410658	soil metagenome													2012-09-25T00:00:00Z	GAZ:United States of America	41.0627	-72.4503		0
2382.MU002.C3.HA.2.682.rhizo.9.12.lane7.NoIndex.L007.sequences	ATGGCTGTCAGT	GTGCCAGCMGCCGCGGTAA	Rhizosphere	HS1	2382	The soil microbiome influences grapevine-associated microbiota (HiSeq)	Jack Gilbert	10.1128/mBio.02527-14	ERP006348	16S rRNA	V4	FWD:GTGCCAGCMGCCGCGGTAA; REV:GGACTACHVGGGTWTCTAAT	HiSeq	ANL-Chicago	CCME	2013-04-23	150	104393	74174	80024	102399	53350	55548	41064	TRUE	TRUE	TRUE	TRUE	FALSE	939928	rhizosphere metagenome													2012-09-25T00:00:00Z	GAZ:United States of America	41.0627	-72.4503		0
2382.MU002.C3.HA.2.682.rhizo.9.12.lane7.NoIndex.L007.sequences	ATGGCTGTCAGT	GTGCCAGCMGCCGCGGTAA	Rhizosphere	HS1	2382	The soil microbiome influences grapevine-associated microbiota (HiSeq)	Jack Gilbert	10.1128/mBio.02527-14	ERP006348	16S rRNA	V4	FWD:GTGCCAGCMGCCGCGGTAA; REV:GGACTACHVGGGTWTCTAAT	HiSeq	ANL-Chicago	CCME	2013-04-23	150	104393	74174	80024	102399	53350	55548	41064	TRUE	TRUE	TRUE	TRUE	FALSE	939928	rhizosphere metagenome													2012-09-25T00:00:00Z	GAZ:United States of America	41.0627	-72.4503		0
2382.MU002.C3.HA.2.682.rhizo.9.12.lane7.NoIndex.L007.sequences	ATGGCTGTCAGT	GTGCCAGCMGCCGCGGTAA	Rhizosphere	HS1	2382	The soil microbiome influences grapevine-associated microbiota (HiSeq)	Jack Gilbert	10.1128/mBio.02527-14	ERP006348	16S rRNA	V4	FWD:GTGCCAGCMGCCGCGGTAA; REV:GGACTACHVGGGTWTCTAAT	HiSeq	ANL-Chicago	CCME	2013-04-23	150	104393	74174	80024	102399	53350	55548	41064	TRUE	TRUE	TRUE	TRUE	FALSE	939928	rhizosphere metagenome													2012-09-25T00:00:00Z	GAZ:United States of America	41.0627	-72.4503		0
2382.MU002.C3.HA.2.683.root.9.12.lane7.NoIndex.L007.sequences	AGCAGAACATCT	GTGCCAGCMGCCGCGGTAA	Roots	HS1	2382	The soil microbiome influences grapevine-associated microbiota (HiSeq)	Jack Gilbert	10.1128/mBio.02527-14	ERP006348	16S rRNA	V4	FWD:GTGCCAGCMGCCGCGGTAA; REV:GGACTACHVGGGTWTCTAAT	HiSeq	ANL-Chicago	CCME	2013-04-23	150	105611	77946	83629	104549	61520	62926	51124	TRUE	TRUE	TRUE	TRUE	TRUE	1118232	root metagenome													2012-09-25T00:00:00Z	GAZ:United States of America	41.0627	-72.4503		0
2382.MU002.C3.HA.3.487.rhizo.4.12.lane7.NoIndex.L007.sequences	GTTAATGGCAGT	GTGCCAGCMGCCGCGGTAA	Rhizosphere	HS10	2382	The soil microbiome influences grapevine-associated microbiota (HiSeq)	Jack Gilbert	10.1128/mBio.02527-14	ERP006348	16S rRNA	V4	FWD:GTGCCAGCMGCCGCGGTAA; REV:GGACTACHVGGGTWTCTAAT	HiSeq	ANL-Chicago	CCME	2013-04-23	150	109285	76471	84246	107022	56756	58667	43499	TRUE	TRUE	TRUE	TRUE	FALSE	939928	rhizosphere metagenome													2012-04-12T00:00:00Z	GAZ:United States of America	41.0628	-72.4503		0
2382.MU002.C3.HA.3.487.rhizo.4.12.lane7.NoIndex.L007.sequences	GTTAATGGCAGT	GTGCCAGCMGCCGCGGTAA	Rhizosphere	HS10	2382	The soil microbiome influences grapevine-associated microbiota (HiSeq)	Jack Gilbert	10.1128/mBio.02527-14	ERP006348	16S rRNA	V4	FWD:GTGCCAGCMGCCGCGGTAA; REV:GGACTACHVGGGTWTCTAAT	HiSeq	ANL-Chicago	CCME	2013-04-23	150	109285	76471	84246	107022	56756	58667	43499	TRUE	TRUE	TRUE	TRUE	FALSE	939928	rhizosphere metagenome													2012-04-12T00:00:00Z	GAZ:United States of America	41.0628	-72.4503		0
2382.MU002.C3.HA.3.487.rhizo.4.12.lane7.NoIndex.L007.sequences	GTTAATGGCAGT	GTGCCAGCMGCCGCGGTAA	Rhizosphere	HS10	2382	The soil microbiome influences grapevine-associated microbiota (HiSeq)	Jack Gilbert	10.1128/mBio.02527-14	ERP006348	16S rRNA	V4	FWD:GTGCCAGCMGCCGCGGTAA; REV:GGACTACHVGGGTWTCTAAT	HiSeq	ANL-Chicago	CCME	2013-04-23	150	109285	76471	84246	107022	56756	58667	43499	TRUE	TRUE	TRUE	TRUE	FALSE	939928	rhizosphere metagenome													2012-04-12T00:00:00Z	GAZ:United States of America	41.0628	-72.4503		0
2382.MU002.C3.HA.3.488.root.4.12.lane7.NoIndex.L007.sequences	GTGTATCGCCAC	GTGCCAGCMGCCGCGGTAA	Roots	HS10	2382	The soil microbiome influences grapevine-associated microbiota (HiSeq)	Jack Gilbert	10.1128/mBio.02527-14	ERP006348	16S rRNA	V4	FWD:GTGCCAGCMGCCGCGGTAA; REV:GGACTACHVGGGTWTCTAAT	HiSeq	ANL-Chicago	CCME	2013-04-23	150	82096	59938	64914	80951	44967	46246	37351	TRUE	TRUE	TRUE	FALSE	FALSE	1118232	root metagenome													2012-04-12T00:00:00Z	GAZ:United States of America	41.0628	-72.4503		0
2382.MU002.C3.HA.3.686.bulk.9.12.lane7.NoIndex.L007.sequences	ATCCTTTGGTTC	GTGCCAGCMGCCGCGGTAA	Bulk_soil	HS1	2382	The soil microbiome influences grapevine-associated microbiota (HiSeq)	Jack Gilbert	10.1128/mBio.02527-14	ERP006348	16S rRNA	V4	FWD:GTGCCAGCMGCCGCGGTAA; REV:GGACTACHVGGGTWTCTAAT	HiSeq	ANL-Chicago	CCME	2013-04-23	150	130158	92133	99794	127803	64626	67371	50175	TRUE	TRUE	FALSE	FALSE	FALSE	410658	soil metagenome													2012-09-25T00:00:00Z	GAZ:United States of America	41.0626	-72.4519		0
2382.MU002.C3.HA.3.686.bulk.9.12.lane7.NoIndex.L007.sequences	ATCCTTTGGTTC	GTGCCAGCMGCCGCGGTAA	Bulk_soil	HS1	2382	The soil microbiome influences grapevine-associated microbiota (HiSeq)	Jack Gilbert	10.1128/mBio.02527-14	ERP006348	16S rRNA	V4	FWD:GTGCCAGCMGCCGCGGTAA; REV:GGACTACHVGGGTWTCTAAT	HiSeq	ANL-Chicago	CCME	2013-04-23	150	130158	92133	99794	127803	64626	67371	50175	TRUE	TRUE	FALSE	FALSE	FALSE	410658	soil metagenome													2012-09-25T00:00:00Z	GAZ:United States of America	41.0626	-72.4519		0
2382.MU002.C3.HA.3.687.rhizo.9.12.lane7.NoIndex.L007.sequences	GTACGATATGAC	GTGCCAGCMGCCGCGGTAA	Rhizosphere	HS1	2382	The soil microbiome influences grapevine-associated microbiota (HiSeq)	Jack Gilbert	10.1128/mBio.02527-14	ERP006348	16S rRNA	V4	FWD:GTGCCAGCMGCCGCGGTAA; REV:GGACTACHVGGGTWTCTAAT	HiSeq	ANL-Chicago	CCME	2013-04-23	150	106122	76879	82384	104398	53990	56055	41411	TRUE	TRUE	TRUE	TRUE	FALSE	939928	rhizosphere metagenome													2012-09-25T00:00:00Z	GAZ:United States of America	41.0626	-72.4519		0
2382.MU002.C3.HA.3.687.rhizo.9.12.lane7.NoIndex.L007.sequences	GTACGATATGAC	GTGCCAGCMGCCGCGGTAA	Rhizosphere	HS1	2382	The soil microbiome influences grapevine-associated microbiota (HiSeq)	Jack Gilbert	10.1128/mBio.02527-14	ERP006348	16S rRNA	V4	FWD:GTGCCAGCMGCCGCGGTAA; REV:GGACTACHVGGGTWTCTAAT	HiSeq	ANL-Chicago	CCME	2013-04-23	150	106122	76879	82384	104398	53990	56055	41411	TRUE	TRUE	TRUE	TRUE	FALSE	939928	rhizosphere metagenome													2012-09-25T00:00:00Z	GAZ:United States of America	41.0626	-72.4519		0
2382.MU002.C3.HA.3.688.root.9.12.lane7.NoIndex.L007.sequences	AGCTTCGACAGT	GTGCCAGCMGCCGCGGTAA	Roots	HS7	2382	The soil microbiome influences grapevine-associated microbiota (HiSeq)	Jack Gilbert	10.1128/mBio.02527-14	ERP006348	16S rRNA	V4	FWD:GTGCCAGCMGCCGCGGTAA; REV:GGACTACHVGGGTWTCTAAT	HiSeq	ANL-Chicago	CCME	2013-04-23	150	380077	283440	297860	377052	225057	229834	191890	TRUE	TRUE	TRUE	TRUE	FALSE	1118232	root metagenome													2012-09-25T00:00:00Z	GAZ:United States of America	41.0626	-72.4519		0
2382.MU002.C3.HA.4.293.root.9.11.lane1.NoIndex.L001.sequences	GAAAGGTGAGAA	GTGCCAGCMGCCGCGGTAA	Roots	HS10	2382	The soil microbiome influences grapevine-associated microbiota (HiSeq)	Jack Gilbert	10.1128/mBio.02527-14	ERP006348	16S rRNA	V4	FWD:GTGCCAGCMGCCGCGGTAA; REV:GGACTACHVGGGTWTCTAAT	HiSeq	ANL-Chicago	CCME	2012-08-22	150	103186	69444	74656	101452	56441	57493	46754	TRUE	TRUE	TRUE	TRUE	FALSE	1118232	root metagenome													2011-09-14T00:00:00Z	GAZ:United States of America	41.0628	-72.4504		0
2382.MU002.C3.HA.4.293.root.9.11.lane1.NoIndex.L001.sequences	GAAAGGTGAGAA	GTGCCAGCMGCCGCGGTAA	Roots	HS10	2382	The soil microbiome influences grapevine-associated microbiota (HiSeq)	Jack Gilbert	10.1128/mBio.02527-14	ERP006348	16S rRNA	V4	FWD:GTGCCAGCMGCCGCGGTAA; REV:GGACTACHVGGGTWTCTAAT	HiSeq	ANL-Chicago	CCME	2012-08-22	150	103186	69444	74656	101452	56441	57493	46754	TRUE	TRUE	TRUE	TRUE	FALSE	1118232	root metagenome													2011-09-14T00:00:00Z	GAZ:United States of America	41.0628	-72.4504		0
2382.MU002.C3.HA.4.492.rhizo.4.12.lane7.NoIndex.L007.sequences	TCAGGACGTATC	GTGCCAGCMGCCGCGGTAA	Rhizosphere	HS9	2382	The soil microbiome influences grapevine-associated microbiota (HiSeq)	Jack Gilbert	10.1128/mBio.02527-14	ERP006348	16S rRNA	V4	FWD:GTGCCAGCMGCCGCGGTAA; REV:GGACTACHVGGGTWTCTAAT	HiSeq	ANL-Chicago	CCME	2013-04-23	150	95691	68630	75053	93958	51401	52910	38765	TRUE	TRUE	TRUE	TRUE	FALSE	939928	rhizosphere metagenome													2011-09-14T00:00:00Z	GAZ:United States of America	41.0628	-72.4504		0
2382.MU002.C3.HA.4.493.root.4.12.lane7.NoIndex.L007.sequences	GCAAGTGTGAGG	GTGCCAGCMGCCGCGGTAA	Roots	HS10	2382	The soil microbiome influences grapevine-associated microbiota (HiSeq)	Jack Gilbert	10.1128/mBio.02527-14	ERP006348	16S rRNA	V4	FWD:GTGCCAGCMGCCGCGGTAA; REV:GGACTACHVGGGTWTCTAAT	HiSeq	ANL-Chicago	CCME	2013-04-23	150	161169	111993	125069	159159	92449	95523	78479	TRUE	TRUE	TRUE	TRUE	FALSE	1118232	root metagenome													2012-04-12T00:00:00Z	GAZ:United States of America	41.0628	-72.4503		0
2382.MU002.C3.HA.4.691.bulk.9.12.lane7.NoIndex.L007.sequences	ACCGGTATGTAC	GTGCCAGCMGCCGCGGTAA	Bulk_soil	HS1	2382	The soil microbiome influences grapevine-associated microbiota (HiSeq)	Jack Gilbert	10.1128/mBio.02527-14	ERP006348	16S rRNA	V4	FWD:GTGCCAGCMGCCGCGGTAA; REV:GGACTACHVGGGTWTCTAAT	HiSeq	ANL-Chicago	CCME	2013-04-23	150	107779	77308	83744	105975	55475	57705	42610	TRUE	TRUE	FALSE	FALSE	FALSE	410658	soil metagenome													2012-09-25T00:00:00Z	GAZ:United States of America	41.0624	-72.4501		0
2382.MU002.C3.HA.4.691.bulk.9.12.lane7.NoIndex.L007.sequences	ACCGGTATGTAC	GTGCCAGCMGCCGCGGTAA	Bulk_soil	HS1	2382	The soil microbiome influences grapevine-associated microbiota (HiSeq)	Jack Gilbert	10.1128/mBio.02527-14	ERP006348	16S rRNA	V4	FWD:GTGCCAGCMGCCGCGGTAA; REV:GGACTACHVGGGTWTCTAAT	HiSeq	ANL-Chicago	CCME	2013-04-23	150	107779	77308	83744	105975	55475	57705	42610	TRUE	TRUE	FALSE	FALSE	FALSE	410658	soil metagenome													2012-09-25T00:00:00Z	GAZ:United States of America	41.0624	-72.4501		0
2382.MU002.C3.HA.4.692.rhizo.9.12.lane7.NoIndex.L007.sequences	GTTCTCTTCTCG	GTGCCAGCMGCCGCGGTAA	Rhizosphere	HS1	2382	The soil microbiome influences grapevine-associated microbiota (HiSeq)	Jack Gilbert	10.1128/mBio.02527-14	ERP006348	16S rRNA	V4	FWD:GTGCCAGCMGCCGCGGTAA; REV:GGACTACHVGGGTWTCTAAT	HiSeq	ANL-Chicago	CCME	2013-04-23	150	121576	85630	94015	119367	65708	67925	50480	TRUE	TRUE	TRUE	TRUE	FALSE	939928	rhizosphere metagenome													2012-09-25T00:00:00Z	GAZ:United States of America	41.0624	-72.4501		0
2382.MU002.C3.HA.4.692.rhizo.9.12.lane7.NoIndex.L007.sequences	GTTCTCTTCTCG	GTGCCAGCMGCCGCGGTAA	Rhizosphere	HS1	2382	The soil microbiome influences grapevine-associated microbiota (HiSeq)	Jack Gilbert	10.1128/mBio.02527-14	ERP006348	16S rRNA	V4	FWD:GTGCCAGCMGCCGCGGTAA; REV:GGACTACHVGGGTWTCTAAT	HiSeq	ANL-Chicago	CCME	2013-04-23	150	121576	85630	94015	119367	65708	67925	50480	TRUE	TRUE	TRUE	TRUE	FALSE	939928	rhizosphere metagenome													2012-09-25T00:00:00Z	GAZ:United States of America	41.0624	-72.4501		0
2382.MU002.C3.HA.4.692.rhizo.9.12.lane7.NoIndex.L007.sequences	GTTCTCTTCTCG	GTGCCAGCMGCCGCGGTAA	Rhizosphere	HS1	2382	The soil microbiome influences grapevine-associated microbiota (HiSeq)	Jack Gilbert	10.1128/mBio.02527-14	ERP006348	16S rRNA	V4	FWD:GTGCCAGCMGCCGCGGTAA; REV:GGACTACHVGGGTWTCTAAT	HiSeq	ANL-Chicago	CCME	2013-04-23	150	121576	85630	94015	119367	65708	67925	50480	TRUE	TRUE	TRUE	TRUE	FALSE	939928	rhizosphere metagenome													2012-09-25T00:00:00Z	GAZ:United States of America	41.0624	-72.4501		0
2382.MU002.C3.HA.4.693.root.9.12.lane7.NoIndex.L007.sequences	ATACGCATCAAG	GTGCCAGCMGCCGCGGTAA	Roots	HS7	2382	The soil microbiome influences grapevine-associated microbiota (HiSeq)	Jack Gilbert	10.1128/mBio.02527-14	ERP006348	16S rRNA	V4	FWD:GTGCCAGCMGCCGCGGTAA; REV:GGACTACHVGGGTWTCTAAT	HiSeq	ANL-Chicago	CCME	2013-04-23	150	330325	235111	261326	327465	199145	205877	169754	TRUE	TRUE	TRUE	TRUE	FALSE	1118232	root metagenome													2012-09-25T00:00:00Z	GAZ:United States of America	41.0624	-72.4501		0
2382.MU002.C3.HA.4.693.root.9.12.lane7.NoIndex.L007.sequences	ATACGCATCAAG	GTGCCAGCMGCCGCGGTAA	Roots	HS7	2382	The soil microbiome influences grapevine-associated microbiota (HiSeq)	Jack Gilbert	10.1128/mBio.02527-14	ERP006348	16S rRNA	V4	FWD:GTGCCAGCMGCCGCGGTAA; REV:GGACTACHVGGGTWTCTAAT	HiSeq	ANL-Chicago	CCME	2013-04-23	150	330325	235111	261326	327465	199145	205877	169754	TRUE	TRUE	TRUE	TRUE	FALSE	1118232	root metagenome													2012-09-25T00:00:00Z	GAZ:United States of America	41.0624	-72.4501		0
2382.MU002.C3.HA.4.75.root.6.11.lane1.NoIndex.L001.sequences	GAATATACCTGG	GTGCCAGCMGCCGCGGTAA	Roots	HS10	2382	The soil microbiome influences grapevine-associated microbiota (HiSeq)	Jack Gilbert	10.1128/mBio.02527-14	ERP006348	16S rRNA	V4	FWD:GTGCCAGCMGCCGCGGTAA; REV:GGACTACHVGGGTWTCTAAT	HiSeq	ANL-Chicago	CCME	2012-08-22	150	122003	84523	88804	120023	67316	68015	56857	TRUE	TRUE	TRUE	FALSE	FALSE	1118232	root metagenome													2011-06-22T00:00:00Z	GAZ:United States of America	41.0627	-75.4501		0
2382.MU002.C3.HA.5.298.root.9.11.lane1.NoIndex.L001.sequences	CAGCCTGCAAAT	GTGCCAGCMGCCGCGGTAA	Roots	HS10	2382	The soil microbiome influences grapevine-associated microbiota (HiSeq)	Jack Gilbert	10.1128/mBio.02527-14	ERP006348	16S rRNA	V4	FWD:GTGCCAGCMGCCGCGGTAA; REV:GGACTACHVGGGTWTCTAAT	HiSeq	ANL-Chicago	CCME	2012-08-22	150	92122	63380	68008	89883	48813	50350	39917	TRUE	TRUE	TRUE	TRUE	TRUE	1118232	root metagenome													2011-09-14T00:00:00Z	GAZ:United States of America	41.0628	-72.4503		0
2382.MU002.C3.HA.5.496.r1.bulk.4.12.lane7.NoIndex.L007.sequences	GAGTTTACGGTC	GTGCCAGCMGCCGCGGTAA	Bulk_soil	HS10	2382	The soil microbiome influences grapevine-associated microbiota (HiSeq)	Jack Gilbert	10.1128/mBio.02527-14	ERP006348	16S rRNA	V4	FWD:GTGCCAGCMGCCGCGGTAA; REV:GGACTACHVGGGTWTCTAAT	HiSeq	ANL-Chicago	CCME	2013-04-23	150	87315	62774	67083	85358	42707	44516	33729	TRUE	TRUE	FALSE	FALSE	FALSE	410658	soil metagenome													2012-04-12T00:00:00Z	GAZ:United States of America	41.0628	-72.4503		0
2382.MU002.C3.HA.5.497.rhizo.4.12.lane7.NoIndex.L007.sequences	GTCGCTTGCACA	GTGCCAGCMGCCGCGGTAA	Rhizosphere	HS10	2382	The soil microbiome influences grapevine-associated microbiota (HiSeq)	Jack Gilbert	10.1128/mBio.02527-14	ERP006348	16S rRNA	V4	FWD:GTGCCAGCMGCCGCGGTAA; REV:GGACTACHVGGGTWTCTAAT	HiSeq	ANL-Chicago	CCME	2013-04-23	150	96965	69086	74014	95207	50809	52417	38487	TRUE	TRUE	TRUE	FALSE	FALSE	939928	rhizosphere metagenome													2012-04-12T00:00:00Z	GAZ:United States of America	41.0149	-72.5285		0
2382.MU002.C3.HA.5.498.root.4.12.lane7.NoIndex.L007.sequences	ACATGTCACGTG	GTGCCAGCMGCCGCGGTAA	Roots	HS10	2382	The soil microbiome influences grapevine-associated microbiota (HiSeq)	Jack Gilbert	10.1128/mBio.02527-14	ERP006348	16S rRNA	V4	FWD:GTGCCAGCMGCCGCGGTAA; REV:GGACTACHVGGGTWTCTAAT	HiSeq	ANL-Chicago	CCME	2013-04-23	150	113497	76105	85525	112109	67633	69144	55469	TRUE	TRUE	TRUE	FALSE	FALSE	1118232	root metagenome													2012-04-12T00:00:00Z	GAZ:United States of America	41.0149	-72.5285		0
2382.MU002.C3.HA.5.696.bulk.9.12.lane7.NoIndex.L007.sequences	GCTGTACGGATT	GTGCCAGCMGCCGCGGTAA	Bulk_soil	HS1	2382	The soil microbiome influences grapevine-associated microbiota (HiSeq)	Jack Gilbert	10.1128/mBio.02527-14	ERP006348	16S rRNA	V4	FWD:GTGCCAGCMGCCGCGGTAA; REV:GGACTACHVGGGTWTCTAAT	HiSeq	ANL-Chicago	CCME	2013-04-23	150	121484	85993	92935	119382	61151	63495	47101	TRUE	TRUE	FALSE	FALSE	FALSE	410658	soil metagenome													2012-09-25T00:00:00Z	GAZ:United States of America	41.0624	-72.4501		0
2382.MU002.C3.HA.5.696.bulk.9.12.lane7.NoIndex.L007.sequences	GCTGTACGGATT	GTGCCAGCMGCCGCGGTAA	Bulk_soil	HS1	2382	The soil microbiome influences grapevine-associated microbiota (HiSeq)	Jack Gilbert	10.1128/mBio.02527-14	ERP006348	16S rRNA	V4	FWD:GTGCCAGCMGCCGCGGTAA; REV:GGACTACHVGGGTWTCTAAT	HiSeq	ANL-Chicago	CCME	2013-04-23	150	121484	85993	92935	119382	61151	63495	47101	TRUE	TRUE	FALSE	FALSE	FALSE	410658	soil metagenome													2012-09-25T00:00:00Z	GAZ:United States of America	41.0624	-72.4501		0
2382.MU002.C3.HA.5.697.rhizo.9.12.lane7.NoIndex.L007.sequences	ATTCTGCCGAAG	GTGCCAGCMGCCGCGGTAA	Rhizosphere	HS1	2382	The soil microbiome influences grapevine-associated microbiota (HiSeq)	Jack Gilbert	10.1128/mBio.02527-14	ERP006348	16S rRNA	V4	FWD:GTGCCAGCMGCCGCGGTAA; REV:GGACTACHVGGGTWTCTAAT	HiSeq	ANL-Chicago	CCME	2013-04-23	150	109230	77494	83822	107314	56722	58609	43851	TRUE	TRUE	TRUE	FALSE	FALSE	939928	rhizosphere metagenome													2012-09-25T00:00:00Z	GAZ:United States of America	41.0624	-72.4501		0
2382.MU002.C3.HA.5.698.root.9.12.lane7.NoIndex.L007.sequences	TAAGCGTCTCGA	GTGCCAGCMGCCGCGGTAA	Roots	HS7	2382	The soil microbiome influences grapevine-associated microbiota (HiSeq)	Jack Gilbert	10.1128/mBio.02527-14	ERP006348	16S rRNA	V4	FWD:GTGCCAGCMGCCGCGGTAA; REV:GGACTACHVGGGTWTCTAAT	HiSeq	ANL-Chicago	CCME	2013-04-23	150	231399	194244	198415	229627	141836	142921	120148	TRUE	TRUE	TRUE	TRUE	FALSE	1118232	root metagenome													2012-09-25T00:00:00Z	GAZ:United States of America	41.0624	-72.4501		0
2382.MU002.C3.HA.5.79.root.6.11.lane1.NoIndex.L001.sequences	CCTTCTGTATAC	GTGCCAGCMGCCGCGGTAA	Roots	HS10	2382	The soil microbiome influences grapevine-associated microbiota (HiSeq)	Jack Gilbert	10.1128/mBio.02527-14	ERP006348	16S rRNA	V4	FWD:GTGCCAGCMGCCGCGGTAA; REV:GGACTACHVGGGTWTCTAAT	HiSeq	ANL-Chicago	CCME	2012-08-22	150	113095	77936	83071	110965	58690	60609	49694	TRUE	TRUE	TRUE	TRUE	FALSE	1118232	root metagenome													2011-06-22T00:00:00Z	GAZ:United States of America	41.0627	-75.4501		0
2382.MU002.C3.HA.5.79.root.6.11.lane1.NoIndex.L001.sequences	CCTTCTGTATAC	GTGCCAGCMGCCGCGGTAA	Roots	HS10	2382	The soil microbiome influences grapevine-associated microbiota (HiSeq)	Jack Gilbert	10.1128/mBio.02527-14	ERP006348	16S rRNA	V4	FWD:GTGCCAGCMGCCGCGGTAA; REV:GGACTACHVGGGTWTCTAAT	HiSeq	ANL-Chicago	CCME	2012-08-22	150	113095	77936	83071	110965	58690	60609	49694	TRUE	TRUE	TRUE	TRUE	FALSE	1118232	root metagenome													2011-06-22T00:00:00Z	GAZ:United States of America	41.0627	-75.4501		0
2382.RU006.C181.RH.1.776.bulk.9.12.lane7.NoIndex.L007.sequences	CAAACAACAGCT	GTGCCAGCMGCCGCGGTAA	Bulk_soil	HS1	2382	The soil microbiome influences grapevine-associated microbiota (HiSeq)	Jack Gilbert	10.1128/mBio.02527-14	ERP006348	16S rRNA	V4	FWD:GTGCCAGCMGCCGCGGTAA; REV:GGACTACHVGGGTWTCTAAT	HiSeq	ANL-Chicago	CCME	2013-04-23	150	108833	81418	86831	106863	54602	56392	42132	TRUE	TRUE	TRUE	FALSE	FALSE	410658	soil metagenome													2012-09-25T00:00:00Z	GAZ:United States of America	41.0094	-72.494		0
2382.SH004.C1.RH.3.411.bulk.4.12.lane7.NoIndex.L007.sequences	CCTGGAATTAAG	GTGCCAGCMGCCGCGGTAA	Bulk_soil	HS10	2382	The soil microbiome influences grapevine-associated microbiota (HiSeq)	Jack Gilbert	10.1128/mBio.02527-14	ERP006348	16S rRNA	V4	FWD:GTGCCAGCMGCCGCGGTAA; REV:GGACTACHVGGGTWTCTAAT	HiSeq	ANL-Chicago	CCME	2013-04-23	150	110672	82028	88122	108434	54801	57134	43235	TRUE	TRUE	FALSE	FALSE	FALSE	410658	soil metagenome													2012-04-11T00:00:00Z	GAZ:United States of America	41.015	-72.5285		0
2382.SH004.C1.RH.5.621.bulk.9.12.lane7.NoIndex.L007.sequences	AGATTGACCAAC	GTGCCAGCMGCCGCGGTAA	Bulk_soil	HS1	2382	The soil microbiome influences grapevine-associated microbiota (HiSeq)	Jack Gilbert	10.1128/mBio.02527-14	ERP006348	16S rRNA	V4	FWD:GTGCCAGCMGCCGCGGTAA; REV:GGACTACHVGGGTWTCTAAT	HiSeq	ANL-Chicago	CCME	2013-04-23	150	113014	84238	90477	110905	55835	58286	43912	TRUE	TRUE	TRUE	TRUE	FALSE	410658	soil metagenome													2012-09-24T00:00:00Z	GAZ:United States of America	41.0149	-72.5284		0
2382.SH005.C3.RH.1.451.bulk.4.12.lane7.NoIndex.L007.sequences	AAGTATCCTGCG	GTGCCAGCMGCCGCGGTAA	Bulk_soil	HS10	2382	The soil microbiome influences grapevine-associated microbiota (HiSeq)	Jack Gilbert	10.1128/mBio.02527-14	ERP006348	16S rRNA	V4	FWD:GTGCCAGCMGCCGCGGTAA; REV:GGACTACHVGGGTWTCTAAT	HiSeq	ANL-Chicago	CCME	2013-04-23	150	97416	71452	76822	95714	47999	50065	38526	TRUE	TRUE	TRUE	TRUE	FALSE	410658	soil metagenome													2012-04-11T00:00:00Z	GAZ:United States of America	41.0153	-72.5281		0
2382.SH005.C3.RH.1.651.bulk.9.12.lane7.NoIndex.L007.sequences	CATTATGGCGTG	GTGCCAGCMGCCGCGGTAA	Bulk_soil	HS1	2382	The soil microbiome influences grapevine-associated microbiota (HiSeq)	Jack Gilbert	10.1128/mBio.02527-14	ERP006348	16S rRNA	V4	FWD:GTGCCAGCMGCCGCGGTAA; REV:GGACTACHVGGGTWTCTAAT	HiSeq	ANL-Chicago	CCME	2013-04-23	150	113022	82571	89715	111194	56916	59052	44661	TRUE	TRUE	TRUE	TRUE	TRUE	410658	soil metagenome													2012-09-24T00:00:00Z	GAZ:United States of America	41.0152	-72.5281		0
2382.SH005.C3.RH.1.652.rhizo.9.12.lane7.NoIndex.L007.sequences	TATACCGCTGCG	GTGCCAGCMGCCGCGGTAA	Rhizosphere	HS1	2382	The soil microbiome influences grapevine-associated microbiota (HiSeq)	Jack Gilbert	10.1128/mBio.02527-14	ERP006348	16S rRNA	V4	FWD:GTGCCAGCMGCCGCGGTAA; REV:GGACTACHVGGGTWTCTAAT	HiSeq	ANL-Chicago	CCME	2013-04-23	150	95640	68200	74805	94253	50102	51774	38252	TRUE	TRUE	TRUE	TRUE	FALSE	939928	rhizosphere metagenome													2012-09-24T00:00:00Z	GAZ:United States of America	41.0152	-72.5281		0
2382.SH005.C3.RH.1.653.root.9.12.lane7.NoIndex.L007.sequences	CCTAGAGAAACT	GTGCCAGCMGCCGCGGTAA	Roots	HS7	2382	The soil microbiome influences grapevine-associated microbiota (HiSeq)	Jack Gilbert	10.1128/mBio.02527-14	ERP006348	16S rRNA	V4	FWD:GTGCCAGCMGCCGCGGTAA; REV:GGACTACHVGGGTWTCTAAT	HiSeq	ANL-Chicago	CCME	2013-04-23	150	350485	262994	289731	347606	202879	209040	170434	TRUE	TRUE	TRUE	TRUE	TRUE	1118232	root metagenome													2012-09-24T00:00:00Z	GAZ:United States of America	41.0152	-72.5281		0
2382.SH005.C3.RH.2.258.root.9.11.lane1.NoIndex.L001.sequences	CGAGATAGTTTG	GTGCCAGCMGCCGCGGTAA	Roots	HS10	2382	The soil microbiome influences grapevine-associated microbiota (HiSeq)	Jack Gilbert	10.1128/mBio.02527-14	ERP006348	16S rRNA	V4	FWD:GTGCCAGCMGCCGCGGTAA; REV:GGACTACHVGGGTWTCTAAT	HiSeq	ANL-Chicago	CCME	2012-08-22	150	87617	62827	66801	85932	47626	48522	40009	TRUE	TRUE	TRUE	TRUE	FALSE	1118232	root metagenome													2011-09-13T00:00:00Z	GAZ:United States of America	41.0153	-72.5282		0
2382.SH005.C3.RH.2.457.rhizo.4.12.lane7.NoIndex.L007.sequences	CTATCGGAAGAT	GTGCCAGCMGCCGCGGTAA	Rhizosphere	HS10	2382	The soil microbiome influences grapevine-associated microbiota (HiSeq)	Jack Gilbert	10.1128/mBio.02527-14	ERP006348	16S rRNA	V4	FWD:GTGCCAGCMGCCGCGGTAA; REV:GGACTACHVGGGTWTCTAAT	HiSeq	ANL-Chicago	CCME	2013-04-23	150	113016	84904	89954	110627	54256	56496	44682	TRUE	TRUE	TRUE	TRUE	FALSE	939928	rhizosphere metagenome													2012-04-11T00:00:00Z	GAZ:United States of America	41.0153	-72.5281		0
2382.SH005.C3.RH.2.458.root.4.12.lane7.NoIndex.L007.sequences	TATAGGCTCCGC	GTGCCAGCMGCCGCGGTAA	Roots	HS10	2382	The soil microbiome influences grapevine-associated microbiota (HiSeq)	Jack Gilbert	10.1128/mBio.02527-14	ERP006348	16S rRNA	V4	FWD:GTGCCAGCMGCCGCGGTAA; REV:GGACTACHVGGGTWTCTAAT	HiSeq	ANL-Chicago	CCME	2013-04-23	150	129981	108968	111787	128826	78668	79980	66956	TRUE	TRUE	TRUE	TRUE	FALSE	1118232	root metagenome													2012-04-11T00:00:00Z	GAZ:United States of America	41.0153	-72.5281		0
2382.SH005.C3.RH.2.656.bulk.9.12.lane7.NoIndex.L007.sequences	GTATCTGCGCGT	GTGCCAGCMGCCGCGGTAA	Bulk_soil	HS1	2382	The soil microbiome influences grapevine-associated microbiota (HiSeq)	Jack Gilbert	10.1128/mBio.02527-14	ERP006348	16S rRNA	V4	FWD:GTGCCAGCMGCCGCGGTAA; REV:GGACTACHVGGGTWTCTAAT	HiSeq	ANL-Chicago	CCME	2013-04-23	150	109901	78710	85892	108208	56569	58733	44202	TRUE	TRUE	FALSE	FALSE	FALSE	410658	soil metagenome													2012-09-24T00:00:00Z	GAZ:United States of America	41.0152	-72.5281		0
2382.SH005.C3.RH.2.656.bulk.9.12.lane7.NoIndex.L007.sequences	GTATCTGCGCGT	GTGCCAGCMGCCGCGGTAA	Bulk_soil	HS1	2382	The soil microbiome influences grapevine-associated microbiota (HiSeq)	Jack Gilbert	10.1128/mBio.02527-14	ERP006348	16S rRNA	V4	FWD:GTGCCAGCMGCCGCGGTAA; REV:GGACTACHVGGGTWTCTAAT	HiSeq	ANL-Chicago	CCME	2013-04-23	150	109901	78710	85892	108208	56569	58733	44202	TRUE	TRUE	FALSE	FALSE	FALSE	410658	soil metagenome													2012-09-24T00:00:00Z	GAZ:United States of America	41.0152	-72.5281		0
2382.SH005.C3.RH.2.657.rhizo.9.12.lane7.NoIndex.L007.sequences	CCACAGATCGAT	GTGCCAGCMGCCGCGGTAA	Rhizosphere	HS1	2382	The soil microbiome influences grapevine-associated microbiota (HiSeq)	Jack Gilbert	10.1128/mBio.02527-14	ERP006348	16S rRNA	V4	FWD:GTGCCAGCMGCCGCGGTAA; REV:GGACTACHVGGGTWTCTAAT	HiSeq	ANL-Chicago	CCME	2013-04-23	150	100653	72935	79639	99171	51915	53187	39870	TRUE	TRUE	TRUE	TRUE	FALSE	939928	rhizosphere metagenome													2012-09-24T00:00:00Z	GAZ:United States of America	41.0152	-72.5281		0
2382.SH005.C3.RH.2.658.root.9.12.lane7.NoIndex.L007.sequences	GCTGTCGTCAAC	GTGCCAGCMGCCGCGGTAA	Roots	HS7	2382	The soil microbiome influences grapevine-associated microbiota (HiSeq)	Jack Gilbert	10.1128/mBio.02527-14	ERP006348	16S rRNA	V4	FWD:GTGCCAGCMGCCGCGGTAA; REV:GGACTACHVGGGTWTCTAAT	HiSeq	ANL-Chicago	CCME	2013-04-23	150	244136	170429	194089	242211	144016	147978	119602	TRUE	TRUE	TRUE	TRUE	FALSE	1118232	root metagenome													2012-09-24T00:00:00Z	GAZ:United States of America	41.0152	-72.5281		0
2382.SH005.C3.RH.3.462.rhizo.4.12.lane7.NoIndex.L007.sequences	GGTACTGTACCA	GTGCCAGCMGCCGCGGTAA	Rhizosphere	HS10	2382	The soil microbiome influences grapevine-associated microbiota (HiSeq)	Jack Gilbert	10.1128/mBio.02527-14	ERP006348	16S rRNA	V4	FWD:GTGCCAGCMGCCGCGGTAA; REV:GGACTACHVGGGTWTCTAAT	HiSeq	ANL-Chicago	CCME	2013-04-23	150	118775	88908	95056	116437	56741	59228	45873	TRUE	TRUE	TRUE	FALSE	FALSE	939928	rhizosphere metagenome													2012-04-11T00:00:00Z	GAZ:United States of America	41.0153	-72.5281		0
2382.SH005.C3.RH.3.51.root.6.11.lane1.NoIndex.L001.sequences	TTAAACCGCGCC	GTGCCAGCMGCCGCGGTAA	Roots	HS10	2382	The soil microbiome influences grapevine-associated microbiota (HiSeq)	Jack Gilbert	10.1128/mBio.02527-14	ERP006348	16S rRNA	V4	FWD:GTGCCAGCMGCCGCGGTAA; REV:GGACTACHVGGGTWTCTAAT	HiSeq	ANL-Chicago	CCME	2012-08-22	150	84008	62613	65889	82750	45143	45893	38767	TRUE	TRUE	TRUE	TRUE	FALSE	1118232	root metagenome													2011-06-21T00:00:00Z	GAZ:United States of America	41.0146	-72.5285		0
2382.SH005.C3.RH.3.661.bulk.9.12.lane7.NoIndex.L007.sequences	CCAATACGCCTG	GTGCCAGCMGCCGCGGTAA	Bulk_soil	HS1	2382	The soil microbiome influences grapevine-associated microbiota (HiSeq)	Jack Gilbert	10.1128/mBio.02527-14	ERP006348	16S rRNA	V4	FWD:GTGCCAGCMGCCGCGGTAA; REV:GGACTACHVGGGTWTCTAAT	HiSeq	ANL-Chicago	CCME	2013-04-23	150	107923	79023	85406	106291	53485	55789	41717	TRUE	TRUE	FALSE	FALSE	FALSE	410658	soil metagenome													2012-09-24T00:00:00Z	GAZ:United States of America	41.0152	-72.5281		0
2382.SH005.C3.RH.3.662.rhizo.9.12.lane7.NoIndex.L007.sequences	ACTCACAGGAAT	GTGCCAGCMGCCGCGGTAA	Rhizosphere	HS1	2382	The soil microbiome influences grapevine-associated microbiota (HiSeq)	Jack Gilbert	10.1128/mBio.02527-14	ERP006348	16S rRNA	V4	FWD:GTGCCAGCMGCCGCGGTAA; REV:GGACTACHVGGGTWTCTAAT	HiSeq	ANL-Chicago	CCME	2013-04-23	150	98439	69010	75978	97044	50604	52365	39243	TRUE	TRUE	TRUE	TRUE	FALSE	939928	rhizosphere metagenome													2012-09-24T00:00:00Z	GAZ:United States of America	41.0152	-72.5281		0
2382.SH005.C3.RH.3.663.root.9.12.lane7.NoIndex.L007.sequences	TGCACAGTCGCT	GTGCCAGCMGCCGCGGTAA	Roots	HS7	2382	The soil microbiome influences grapevine-associated microbiota (HiSeq)	Jack Gilbert	10.1128/mBio.02527-14	ERP006348	16S rRNA	V4	FWD:GTGCCAGCMGCCGCGGTAA; REV:GGACTACHVGGGTWTCTAAT	HiSeq	ANL-Chicago	CCME	2013-04-23	150	245415	164476	182072	243662	149515	153518	126128	TRUE	TRUE	TRUE	FALSE	FALSE	1118232	root metagenome													2012-09-24T00:00:00Z	GAZ:United States of America	41.0152	-72.5281		0
2382.SH005.C3.RH.4.666.bulk.9.12.lane7.NoIndex.L007.sequences	CAAATTCGGGAT	GTGCCAGCMGCCGCGGTAA	Bulk_soil	HS1	2382	The soil microbiome influences grapevine-associated microbiota (HiSeq)	Jack Gilbert	10.1128/mBio.02527-14	ERP006348	16S rRNA	V4	FWD:GTGCCAGCMGCCGCGGTAA; REV:GGACTACHVGGGTWTCTAAT	HiSeq	ANL-Chicago	CCME	2013-04-23	150	101712	75083	80760	100075	51937	53957	40514	TRUE	TRUE	TRUE	FALSE	FALSE	410658	soil metagenome													2012-09-24T00:00:00Z	GAZ:United States of America	41.0152	-72.5281		0
2382.SH005.C3.RH.4.667.rhizo.9.12.lane7.NoIndex.L007.sequences	GTCGACAGAGGA	GTGCCAGCMGCCGCGGTAA	Rhizosphere	HS1	2382	The soil microbiome influences grapevine-associated microbiota (HiSeq)	Jack Gilbert	10.1128/mBio.02527-14	ERP006348	16S rRNA	V4	FWD:GTGCCAGCMGCCGCGGTAA; REV:GGACTACHVGGGTWTCTAAT	HiSeq	ANL-Chicago	CCME	2013-04-23	150	110767	83396	89601	108877	53893	56172	42672	TRUE	TRUE	TRUE	FALSE	FALSE	939928	rhizosphere metagenome													2012-09-24T00:00:00Z	GAZ:United States of America	41.0152	-72.5281		0
2382.SH005.C3.RH.5.273.root.9.11.lane1.NoIndex.L001.sequences	CGCGTCAAACTA	GTGCCAGCMGCCGCGGTAA	Roots	HS10	2382	The soil microbiome influences grapevine-associated microbiota (HiSeq)	Jack Gilbert	10.1128/mBio.02527-14	ERP006348	16S rRNA	V4	FWD:GTGCCAGCMGCCGCGGTAA; REV:GGACTACHVGGGTWTCTAAT	HiSeq	ANL-Chicago	CCME	2012-08-22	150	86269	62274	65718	84777	43366	44025	37223	TRUE	TRUE	TRUE	TRUE	FALSE	1118232	root metagenome													2011-09-13T00:00:00Z	GAZ:United States of America	41.0153	-72.5281		0
2382.SH005.C3.RH.5.471.bulk.4.12.lane7.NoIndex.L007.sequences	TTGACACACGAC	GTGCCAGCMGCCGCGGTAA	Bulk_soil	HS10	2382	The soil microbiome influences grapevine-associated microbiota (HiSeq)	Jack Gilbert	10.1128/mBio.02527-14	ERP006348	16S rRNA	V4	FWD:GTGCCAGCMGCCGCGGTAA; REV:GGACTACHVGGGTWTCTAAT	HiSeq	ANL-Chicago	CCME	2013-04-23	150	90972	68212	72951	89431	44858	46806	35863	TRUE	TRUE	FALSE	FALSE	FALSE	410658	soil metagenome													2012-04-11T00:00:00Z	GAZ:United States of America	41.0153	-72.5281		0
2382.SH005.C3.RH.5.671.bulk.9.12.lane7.NoIndex.L007.sequences	CGAGGGAAAGTC	GTGCCAGCMGCCGCGGTAA	Bulk_soil	HS1	2382	The soil microbiome influences grapevine-associated microbiota (HiSeq)	Jack Gilbert	10.1128/mBio.02527-14	ERP006348	16S rRNA	V4	FWD:GTGCCAGCMGCCGCGGTAA; REV:GGACTACHVGGGTWTCTAAT	HiSeq	ANL-Chicago	CCME	2013-04-23	150	105799	77140	83351	104142	54510	56380	42103	TRUE	TRUE	TRUE	FALSE	FALSE	410658	soil metagenome													2012-09-24T00:00:00Z	GAZ:United States of America	41.0152	-72.5281		0
2382.SH005.C3.RH.5.672.rhizo.9.12.lane7.NoIndex.L007.sequences	AGTTGAGGCATT	GTGCCAGCMGCCGCGGTAA	Rhizosphere	HS1	2382	The soil microbiome influences grapevine-associated microbiota (HiSeq)	Jack Gilbert	10.1128/mBio.02527-14	ERP006348	16S rRNA	V4	FWD:GTGCCAGCMGCCGCGGTAA; REV:GGACTACHVGGGTWTCTAAT	HiSeq	ANL-Chicago	CCME	2013-04-23	150	112503	80797	88171	110665	57626	59784	44485	TRUE	TRUE	TRUE	TRUE	TRUE	939928	rhizosphere metagenome													2012-09-24T00:00:00Z	GAZ:United States of America	41.0152	-72.5281		0
2382.SH005.C3.RH.5.673.root.9.12.lane7.NoIndex.L007.sequences	AAGCTTGAAACC	GTGCCAGCMGCCGCGGTAA	Roots	HS7	2382	The soil microbiome influences grapevine-associated microbiota (HiSeq)	Jack Gilbert	10.1128/mBio.02527-14	ERP006348	16S rRNA	V4	FWD:GTGCCAGCMGCCGCGGTAA; REV:GGACTACHVGGGTWTCTAAT	HiSeq	ANL-Chicago	CCME	2013-04-23	150	261562	204072	215793	258945	144779	147982	120705	TRUE	TRUE	TRUE	TRUE	FALSE	1118232	root metagenome													2012-09-24T00:00:00Z	GAZ:United States of America	41.0152	-72.5281		0
2382.SH008.C6.HA.2.731.bulk.9.12.lane7.NoIndex.L007.sequences	TACAGCGCATAC	GTGCCAGCMGCCGCGGTAA	Bulk_soil	HS1	2382	The soil microbiome influences grapevine-associated microbiota (HiSeq)	Jack Gilbert	10.1128/mBio.02527-14	ERP006348	16S rRNA	V4	FWD:GTGCCAGCMGCCGCGGTAA; REV:GGACTACHVGGGTWTCTAAT	HiSeq	ANL-Chicago	CCME	2013-04-23	150	112865	83862	90682	111003	55779	58247	43832	TRUE	TRUE	TRUE	FALSE	FALSE	410658	soil metagenome													2012-09-24T00:00:00Z	GAZ:United States of America	41.0145	-72.5285		0
2382.SH008.C6.HA.4.741.bulk.9.12.lane7.NoIndex.L007.sequences	TACGAGCCCTAA	GTGCCAGCMGCCGCGGTAA	Bulk_soil	HS1	2382	The soil microbiome influences grapevine-associated microbiota (HiSeq)	Jack Gilbert	10.1128/mBio.02527-14	ERP006348	16S rRNA	V4	FWD:GTGCCAGCMGCCGCGGTAA; REV:GGACTACHVGGGTWTCTAAT	HiSeq	ANL-Chicago	CCME	2013-04-23	150	109159	80769	87256	107412	54070	56431	42482	TRUE	TRUE	TRUE	FALSE	FALSE	410658	soil metagenome													2012-09-24T00:00:00Z	GAZ:United States of America	41.0145	-72.5285		0
678.OA.mesocosm.379	CTAAGACGTCGT	GTGCCAGCMGCCGCGGTAA	Sediment DNA extracted from OA mesocosm study	379	678	Bioturbating shrimp alter the structure and diversity of bacterial communities in coastal marine sediments	Bonnie Laverock	10.1038/ismej.2010.86	ERP017221	16S rRNA	V4	FWD:GTGCCAGCMGCCGCGGTAA; REV:GGACTACHVGGGTWTCTAAT	HiSeq	ANL-Chicago	ANL	2010-11-03	143	132164	71257	78075	128351	58344	59636	22442	TRUE	TRUE	TRUE	TRUE	FALSE	412755	marine sediment metagenome													2010-05-03T00:00:00Z	GAZ:England	50.338	-4.148	5	0
755.EF.DELTA.30.06.11.lane1.NoIndex.L001	CATCGGATCTGA	GTGCCAGCMGCCGCGGTAA	samples of water from slow_sand filter water purification system	XXQIITAXX	755	Replicating the microbial community and water quality performance of full-scale slow sand filters in laboratory-scale filters	Sarah Haig	10.1016/j.watres.2014.05.008	ERP020510	16S rRNA	V4	FWD:GTGCCAGCMGCCGCGGTAA; REV:GGACTACHVGGGTWTCTAAT	HiSeq	ANL-Chicago	ANL	2013	150	67741	43194	46822	67020	38316	39071	28525	TRUE	TRUE	TRUE	FALSE	FALSE	718308	biofilm metagenome													2011-06-30T00:00:00Z	GAZ:Scotland	55.873	-4.284	0	0
755.EFA.10.05.11.lane1.NoIndex.L001	TAACGCTGTGTG	GTGCCAGCMGCCGCGGTAA	samples of water from slow_sand filter water purification system	XXQIITAXX	755	Replicating the microbial community and water quality performance of full-scale slow sand filters in laboratory-scale filters	Sarah Haig	10.1016/j.watres.2014.05.008	ERP020510	16S rRNA	V4	FWD:GTGCCAGCMGCCGCGGTAA; REV:GGACTACHVGGGTWTCTAAT	HiSeq	ANL-Chicago	ANL	2013	150	97215	84991	86338	96324	64517	64876	52021	TRUE	TRUE	TRUE	FALSE	FALSE	718308	biofilm metagenome													2011-05-11T00:00:00Z	GAZ:Scotland	55.906	-3.204	0	0
755.EFA.14.06.11.lane1.NoIndex.L001	GATAGCACTCGT	GTGCCAGCMGCCGCGGTAA	samples of water from slow_sand filter water purification system	XXQIITAXX	755	Replicating the microbial community and water quality performance of full-scale slow sand filters in laboratory-scale filters	Sarah Haig	10.1016/j.watres.2014.05.008	ERP020510	16S rRNA	V4	FWD:GTGCCAGCMGCCGCGGTAA; REV:GGACTACHVGGGTWTCTAAT	HiSeq	ANL-Chicago	ANL	2013	150	72953	48191	51943	72402	44529	45830	34339	TRUE	TRUE	TRUE	FALSE	FALSE	718308	biofilm metagenome													2011-06-14T00:00:00Z	GAZ:Scotland	55.906	-3.204	0	0
755.EFA.19.04.11.lane1.NoIndex.L001	ACTGATGGCCTC	GTGCCAGCMGCCGCGGTAA	samples of water from slow_sand filter water purification system	XXQIITAXX	755	Replicating the microbial community and water quality performance of full-scale slow sand filters in laboratory-scale filters	Sarah Haig	10.1016/j.watres.2014.05.008	ERP020510	16S rRNA	V4	FWD:GTGCCAGCMGCCGCGGTAA; REV:GGACTACHVGGGTWTCTAAT	HiSeq	ANL-Chicago	ANL	2013	150	104540	73226	78797	103664	62428	64168	47936	TRUE	TRUE	TRUE	FALSE	FALSE	718308	biofilm metagenome													2011-04-19T00:00:00Z	GAZ:Scotland	55.906	-3.204	0	0
755.EFA.26.07.11.lane1.NoIndex.L001	TCACCATCCGAG	GTGCCAGCMGCCGCGGTAA	samples of water from slow_sand filter water purification system	XXQIITAXX	755	Replicating the microbial community and water quality performance of full-scale slow sand filters in laboratory-scale filters	Sarah Haig	10.1016/j.watres.2014.05.008	ERP020510	16S rRNA	V4	FWD:GTGCCAGCMGCCGCGGTAA; REV:GGACTACHVGGGTWTCTAAT	HiSeq	ANL-Chicago	ANL	2013	150	85256	58344	61977	84392	48573	50335	37968	TRUE	TRUE	TRUE	FALSE	FALSE	718308	biofilm metagenome													2011-07-26T00:00:00Z	GAZ:Scotland	55.906	-3.204	0	0
755.EFA.28.06.11.lane1.NoIndex.L001	CTACCACGGTAC	GTGCCAGCMGCCGCGGTAA	samples of water from slow_sand filter water purification system	XXQIITAXX	755	Replicating the microbial community and water quality performance of full-scale slow sand filters in laboratory-scale filters	Sarah Haig	10.1016/j.watres.2014.05.008	ERP020510	16S rRNA	V4	FWD:GTGCCAGCMGCCGCGGTAA; REV:GGACTACHVGGGTWTCTAAT	HiSeq	ANL-Chicago	ANL	2013	150	62649	47662	49778	62261	39870	40407	31091	TRUE	TRUE	TRUE	TRUE	FALSE	718308	biofilm metagenome													2011-06-28T00:00:00Z	GAZ:Scotland	55.906	-3.204	0	0
755.EFB.06.07.11.lane1.NoIndex.L001	GCAAATCAGCCT	GTGCCAGCMGCCGCGGTAA	samples of water from slow_sand filter water purification system	XXQIITAXX	755	Replicating the microbial community and water quality performance of full-scale slow sand filters in laboratory-scale filters	Sarah Haig	10.1016/j.watres.2014.05.008	ERP020510	16S rRNA	V4	FWD:GTGCCAGCMGCCGCGGTAA; REV:GGACTACHVGGGTWTCTAAT	HiSeq	ANL-Chicago	ANL	2013	150	117868	72548	78834	116652	67360	69696	52387	TRUE	TRUE	TRUE	FALSE	FALSE	718308	biofilm metagenome													2011-07-06T00:00:00Z	GAZ:Scotland	55.905	-3.204	0	0
755.EFB.12.07.11.lane1.NoIndex.L001	TCTCAGCGCGTA	GTGCCAGCMGCCGCGGTAA	samples of water from slow_sand filter water purification system	XXQIITAXX	755	Replicating the microbial community and water quality performance of full-scale slow sand filters in laboratory-scale filters	Sarah Haig	10.1016/j.watres.2014.05.008	ERP020510	16S rRNA	V4	FWD:GTGCCAGCMGCCGCGGTAA; REV:GGACTACHVGGGTWTCTAAT	HiSeq	ANL-Chicago	ANL	2013	150	78340	54387	57168	77592	50695	51541	40015	TRUE	TRUE	TRUE	FALSE	FALSE	718308	biofilm metagenome													2011-07-12T00:00:00Z	GAZ:Scotland	55.905	-3.204	0	0
755.EFB.14.06.11.lane1.NoIndex.L001	CGAAGCATCTAC	GTGCCAGCMGCCGCGGTAA	samples of water from slow_sand filter water purification system	XXQIITAXX	755	Replicating the microbial community and water quality performance of full-scale slow sand filters in laboratory-scale filters	Sarah Haig	10.1016/j.watres.2014.05.008	ERP020510	16S rRNA	V4	FWD:GTGCCAGCMGCCGCGGTAA; REV:GGACTACHVGGGTWTCTAAT	HiSeq	ANL-Chicago	ANL	2013	150	60932	53717	54619	60628	41705	41822	34444	TRUE	TRUE	TRUE	TRUE	FALSE	718308	biofilm metagenome													2011-06-14T00:00:00Z	GAZ:Scotland	55.905	-3.204	0	0
755.EFB.21.06.11.lane1.NoIndex.L001	TGGCCGTTACTG	GTGCCAGCMGCCGCGGTAA	samples of water from slow_sand filter water purification system	XXQIITAXX	755	Replicating the microbial community and water quality performance of full-scale slow sand filters in laboratory-scale filters	Sarah Haig	10.1016/j.watres.2014.05.008	ERP020510	16S rRNA	V4	FWD:GTGCCAGCMGCCGCGGTAA; REV:GGACTACHVGGGTWTCTAAT	HiSeq	ANL-Chicago	ANL	2013	150	73729	46197	49357	72672	40190	41154	28979	TRUE	TRUE	TRUE	TRUE	FALSE	718308	biofilm metagenome													2011-06-21T00:00:00Z	GAZ:Scotland	55.905	-3.204	0	0
755.EFB.24.08.11.lane1.NoIndex.L001	TTGGACGTCCAC	GTGCCAGCMGCCGCGGTAA	samples of water from slow_sand filter water purification system	XXQIITAXX	755	Replicating the microbial community and water quality performance of full-scale slow sand filters in laboratory-scale filters	Sarah Haig	10.1016/j.watres.2014.05.008	ERP020510	16S rRNA	V4	FWD:GTGCCAGCMGCCGCGGTAA; REV:GGACTACHVGGGTWTCTAAT	HiSeq	ANL-Chicago	ANL	2013	150	93047	68408	71857	92301	56131	57351	44355	TRUE	TRUE	TRUE	TRUE	FALSE	718308	biofilm metagenome													2011-08-24T00:00:00Z	GAZ:Scotland	55.905	-3.204	0	0
755.INA.06.07.11.lane1.NoIndex.L001	GTTGGCGTTACA	GTGCCAGCMGCCGCGGTAA	samples of water from slow_sand filter water purification system	XXQIITAXX	755	Replicating the microbial community and water quality performance of full-scale slow sand filters in laboratory-scale filters	Sarah Haig	10.1016/j.watres.2014.05.008	ERP020510	16S rRNA	V4	FWD:GTGCCAGCMGCCGCGGTAA; REV:GGACTACHVGGGTWTCTAAT	HiSeq	ANL-Chicago	ANL	2013	150	75020	61277	63048	74447	47024	47658	38042	TRUE	TRUE	TRUE	FALSE	FALSE	718308	biofilm metagenome													2011-07-06T00:00:00Z	GAZ:Scotland	55.905	-3.204	0	0
755.INA.14.06.11.lane1.NoIndex.L001	CGTGCACAATTG	GTGCCAGCMGCCGCGGTAA	samples of water from slow_sand filter water purification system	XXQIITAXX	755	Replicating the microbial community and water quality performance of full-scale slow sand filters in laboratory-scale filters	Sarah Haig	10.1016/j.watres.2014.05.008	ERP020510	16S rRNA	V4	FWD:GTGCCAGCMGCCGCGGTAA; REV:GGACTACHVGGGTWTCTAAT	HiSeq	ANL-Chicago	ANL	2013	150	79722	53671	57671	78957	46854	48232	36590	TRUE	TRUE	TRUE	FALSE	FALSE	718308	biofilm metagenome													2011-06-14T00:00:00Z	GAZ:Scotland	55.905	-3.204	0	0
755.INA.19.04.11.lane1.NoIndex.L001	CTGAAGGGCGAA	GTGCCAGCMGCCGCGGTAA	samples of water from slow_sand filter water purification system	XXQIITAXX	755	Replicating the microbial community and water quality performance of full-scale slow sand filters in laboratory-scale filters	Sarah Haig	10.1016/j.watres.2014.05.008	ERP020510	16S rRNA	V4	FWD:GTGCCAGCMGCCGCGGTAA; REV:GGACTACHVGGGTWTCTAAT	HiSeq	ANL-Chicago	ANL	2013	150	90075	65893	74559	89452	63097	63279	48480	TRUE	TRUE	TRUE	FALSE	FALSE	718308	biofilm metagenome													2011-04-19T00:00:00Z	GAZ:Scotland	55.905	-3.204	0	0
755.INA.19.07.11.lane1.NoIndex.L001	TGTGGAAACTCC	GTGCCAGCMGCCGCGGTAA	samples of water from slow_sand filter water purification system	XXQIITAXX	755	Replicating the microbial community and water quality performance of full-scale slow sand filters in laboratory-scale filters	Sarah Haig	10.1016/j.watres.2014.05.008	ERP020510	16S rRNA	V4	FWD:GTGCCAGCMGCCGCGGTAA; REV:GGACTACHVGGGTWTCTAAT	HiSeq	ANL-Chicago	ANL	2013	150	90543	62609	66230	89379	51801	53202	40230	TRUE	TRUE	TRUE	TRUE	TRUE	718308	biofilm metagenome													2011-07-19T00:00:00Z	GAZ:Scotland	55.905	-3.204	0	0
755.INA.24.08.11.lane1.NoIndex.L001	GTGACGTTAGTC	GTGCCAGCMGCCGCGGTAA	samples of water from slow_sand filter water purification system	XXQIITAXX	755	Replicating the microbial community and water quality performance of full-scale slow sand filters in laboratory-scale filters	Sarah Haig	10.1016/j.watres.2014.05.008	ERP020510	16S rRNA	V4	FWD:GTGCCAGCMGCCGCGGTAA; REV:GGACTACHVGGGTWTCTAAT	HiSeq	ANL-Chicago	ANL	2013	150	77773	55098	58250	77003	45580	46677	35849	TRUE	TRUE	TRUE	FALSE	FALSE	718308	biofilm metagenome													2011-08-24T00:00:00Z	GAZ:Scotland	55.905	-3.204	0	0
755.INA.28.06.11.lane1.NoIndex.L001	TAAGATGCAGTC	GTGCCAGCMGCCGCGGTAA	samples of water from slow_sand filter water purification system	XXQIITAXX	755	Replicating the microbial community and water quality performance of full-scale slow sand filters in laboratory-scale filters	Sarah Haig	10.1016/j.watres.2014.05.008	ERP020510	16S rRNA	V4	FWD:GTGCCAGCMGCCGCGGTAA; REV:GGACTACHVGGGTWTCTAAT	HiSeq	ANL-Chicago	ANL	2013	150	104403	67942	73230	103341	59731	61861	46090	TRUE	TRUE	TRUE	TRUE	FALSE	718308	biofilm metagenome													2011-06-28T00:00:00Z	GAZ:Scotland	55.905	-3.204	0	0
755.INB.06.07.11.lane1.NoIndex.L001	TAGACCGACTCC	GTGCCAGCMGCCGCGGTAA	samples of water from slow_sand filter water purification system	XXQIITAXX	755	Replicating the microbial community and water quality performance of full-scale slow sand filters in laboratory-scale filters	Sarah Haig	10.1016/j.watres.2014.05.008	ERP020510	16S rRNA	V4	FWD:GTGCCAGCMGCCGCGGTAA; REV:GGACTACHVGGGTWTCTAAT	HiSeq	ANL-Chicago	ANL	2013	150	96389	62328	67010	95362	53544	55764	43053	TRUE	TRUE	TRUE	TRUE	FALSE	718308	biofilm metagenome													2011-07-06T00:00:00Z	GAZ:Scotland	55.905	-3.204	0	0
755.INB.07.06.11.lane1.NoIndex.L001	CTAGGATCACTG	GTGCCAGCMGCCGCGGTAA	samples of water from slow_sand filter water purification system	XXQIITAXX	755	Replicating the microbial community and water quality performance of full-scale slow sand filters in laboratory-scale filters	Sarah Haig	10.1016/j.watres.2014.05.008	ERP020510	16S rRNA	V4	FWD:GTGCCAGCMGCCGCGGTAA; REV:GGACTACHVGGGTWTCTAAT	HiSeq	ANL-Chicago	ANL	2013	150	76096	60956	62705	75321	47198	47596	39329	TRUE	TRUE	TRUE	FALSE	FALSE	718308	biofilm metagenome													2011-06-07T00:00:00Z	GAZ:Scotland	55.905	-3.204	0	0
755.INB.10.05.11.lane1.NoIndex.L001	CGATCGAACACT	GTGCCAGCMGCCGCGGTAA	samples of water from slow_sand filter water purification system	XXQIITAXX	755	Replicating the microbial community and water quality performance of full-scale slow sand filters in laboratory-scale filters	Sarah Haig	10.1016/j.watres.2014.05.008	ERP020510	16S rRNA	V4	FWD:GTGCCAGCMGCCGCGGTAA; REV:GGACTACHVGGGTWTCTAAT	HiSeq	ANL-Chicago	ANL	2013	150	82501	64501	66817	81915	50756	51873	39963	TRUE	TRUE	TRUE	FALSE	FALSE	718308	biofilm metagenome													2011-05-11T00:00:00Z	GAZ:Scotland	55.905	-3.204	0	0
755.INB.12.07.11.lane1.NoIndex.L001	ACTAGGATCAGT	GTGCCAGCMGCCGCGGTAA	samples of water from slow_sand filter water purification system	XXQIITAXX	755	Replicating the microbial community and water quality performance of full-scale slow sand filters in laboratory-scale filters	Sarah Haig	10.1016/j.watres.2014.05.008	ERP020510	16S rRNA	V4	FWD:GTGCCAGCMGCCGCGGTAA; REV:GGACTACHVGGGTWTCTAAT	HiSeq	ANL-Chicago	ANL	2013	150	98499	70790	74117	97585	59886	61533	48069	TRUE	TRUE	TRUE	FALSE	FALSE	718308	biofilm metagenome													2011-07-12T00:00:00Z	GAZ:Scotland	55.905	-3.204	0	0
755.INB.14.06.11.lane1.NoIndex.L001	CTCATCATGTTC	GTGCCAGCMGCCGCGGTAA	samples of water from slow_sand filter water purification system	XXQIITAXX	755	Replicating the microbial community and water quality performance of full-scale slow sand filters in laboratory-scale filters	Sarah Haig	10.1016/j.watres.2014.05.008	ERP020510	16S rRNA	V4	FWD:GTGCCAGCMGCCGCGGTAA; REV:GGACTACHVGGGTWTCTAAT	HiSeq	ANL-Chicago	ANL	2013	150	64355	55365	56611	63978	45849	46121	37118	TRUE	TRUE	TRUE	TRUE	FALSE	718308	biofilm metagenome													2011-06-14T00:00:00Z	GAZ:Scotland	55.905	-3.204	0	0
755.INB.21.06.11.lane1.NoIndex.L001	CAAACCTATGGC	GTGCCAGCMGCCGCGGTAA	samples of water from slow_sand filter water purification system	XXQIITAXX	755	Replicating the microbial community and water quality performance of full-scale slow sand filters in laboratory-scale filters	Sarah Haig	10.1016/j.watres.2014.05.008	ERP020510	16S rRNA	V4	FWD:GTGCCAGCMGCCGCGGTAA; REV:GGACTACHVGGGTWTCTAAT	HiSeq	ANL-Chicago	ANL	2013	150	79139	49376	52716	78080	44207	45376	32934	TRUE	TRUE	TRUE	TRUE	FALSE	718308	biofilm metagenome													2011-06-21T00:00:00Z	GAZ:Scotland	55.905	-3.204	0	0
755.INB.24.08.11.lane1.NoIndex.L001	ATCGATCCACAG	GTGCCAGCMGCCGCGGTAA	samples of water from slow_sand filter water purification system	XXQIITAXX	755	Replicating the microbial community and water quality performance of full-scale slow sand filters in laboratory-scale filters	Sarah Haig	10.1016/j.watres.2014.05.008	ERP020510	16S rRNA	V4	FWD:GTGCCAGCMGCCGCGGTAA; REV:GGACTACHVGGGTWTCTAAT	HiSeq	ANL-Chicago	ANL	2013	150	87439	54792	59711	86528	50235	51638	38128	TRUE	TRUE	TRUE	TRUE	TRUE	718308	biofilm metagenome													2011-08-24T00:00:00Z	GAZ:Scotland	55.905	-3.204	0	0
755.INB.26.07.11.lane1.NoIndex.L001	AGCCTGGTACCT	GTGCCAGCMGCCGCGGTAA	samples of water from slow_sand filter water purification system	XXQIITAXX	755	Replicating the microbial community and water quality performance of full-scale slow sand filters in laboratory-scale filters	Sarah Haig	10.1016/j.watres.2014.05.008	ERP020510	16S rRNA	V4	FWD:GTGCCAGCMGCCGCGGTAA; REV:GGACTACHVGGGTWTCTAAT	HiSeq	ANL-Chicago	ANL	2013	150	83374	69425	71109	82465	50339	51115	41462	TRUE	TRUE	TRUE	TRUE	TRUE	718308	biofilm metagenome													2011-07-26T00:00:00Z	GAZ:Scotland	55.905	-3.204	0	0
755.LSSF.ALPHA.D10.08.07.11.lane1.NoIndex.L001	AGATTGACCAAC	GTGCCAGCMGCCGCGGTAA	samples of sand from labscale_slow_sand filter with dirty sand: water purification system	XXQIITAXX	755	Replicating the microbial community and water quality performance of full-scale slow sand filters in laboratory-scale filters	Sarah Haig	10.1016/j.watres.2014.05.008	ERP020510	16S rRNA	V4	FWD:GTGCCAGCMGCCGCGGTAA; REV:GGACTACHVGGGTWTCTAAT	HiSeq	ANL-Chicago	ANL	2013	150	87922	65909	69080	86822	47649	49614	38981	TRUE	TRUE	FALSE	FALSE	FALSE	718308	biofilm metagenome													2011-07-08T00:00:00Z	GAZ:Scotland	55.873	-4.284	0.1	0
755.LSSF.ALPHA.D10.23.06.11.lane1.NoIndex.L001	GAACACTTTGGA	GTGCCAGCMGCCGCGGTAA	samples of sand from labscale_slow_sand filter with dirty sand: water purification system	XXQIITAXX	755	Replicating the microbial community and water quality performance of full-scale slow sand filters in laboratory-scale filters	Sarah Haig	10.1016/j.watres.2014.05.008	ERP020510	16S rRNA	V4	FWD:GTGCCAGCMGCCGCGGTAA; REV:GGACTACHVGGGTWTCTAAT	HiSeq	ANL-Chicago	ANL	2013	150	82285	59859	63574	81083	44108	45604	34971	TRUE	TRUE	FALSE	FALSE	FALSE	718308	biofilm metagenome													2011-06-23T00:00:00Z	GAZ:Scotland	55.873	-4.284	0.1	0
755.LSSF.ALPHA.D15.09.06.11.lane1.NoIndex.L001	GCTCGAAGATTC	GTGCCAGCMGCCGCGGTAA	samples of sand from labscale_slow_sand filter with dirty sand: water purification system	XXQIITAXX	755	Replicating the microbial community and water quality performance of full-scale slow sand filters in laboratory-scale filters	Sarah Haig	10.1016/j.watres.2014.05.008	ERP020510	16S rRNA	V4	FWD:GTGCCAGCMGCCGCGGTAA; REV:GGACTACHVGGGTWTCTAAT	HiSeq	ANL-Chicago	ANL	2013	150	53793	43914	45360	53133	30362	30752	22021	TRUE	TRUE	FALSE	FALSE	FALSE	718308	biofilm metagenome													2011-06-09T00:00:00Z	GAZ:Scotland	55.873	-4.284	10.05	0
755.LSSF.ALPHA.D20.08.07.11.lane1.NoIndex.L001	GTCGACAGAGGA	GTGCCAGCMGCCGCGGTAA	samples of sand from labscale_slow_sand filter with dirty sand: water purification system	XXQIITAXX	755	Replicating the microbial community and water quality performance of full-scale slow sand filters in laboratory-scale filters	Sarah Haig	10.1016/j.watres.2014.05.008	ERP020510	16S rRNA	V4	FWD:GTGCCAGCMGCCGCGGTAA; REV:GGACTACHVGGGTWTCTAAT	HiSeq	ANL-Chicago	ANL	2013	150	92404	60850	65461	91149	50007	51730	38483	TRUE	TRUE	FALSE	FALSE	FALSE	718308	biofilm metagenome													2011-07-08T00:00:00Z	GAZ:Scotland	55.873	-4.284	0.2	0
755.LSSF.ALPHA.D20.08.07.11.lane1.NoIndex.L001	GTCGACAGAGGA	GTGCCAGCMGCCGCGGTAA	samples of sand from labscale_slow_sand filter with dirty sand: water purification system	XXQIITAXX	755	Replicating the microbial community and water quality performance of full-scale slow sand filters in laboratory-scale filters	Sarah Haig	10.1016/j.watres.2014.05.008	ERP020510	16S rRNA	V4	FWD:GTGCCAGCMGCCGCGGTAA; REV:GGACTACHVGGGTWTCTAAT	HiSeq	ANL-Chicago	ANL	2013	150	92404	60850	65461	91149	50007	51730	38483	TRUE	TRUE	FALSE	FALSE	FALSE	718308	biofilm metagenome													2011-07-08T00:00:00Z	GAZ:Scotland	55.873	-4.284	0.2	0
755.LSSF.ALPHA.D30.08.07.11.lane1.NoIndex.L001	CTCACCTAGGAA	GTGCCAGCMGCCGCGGTAA	samples of sand from labscale_slow_sand filter with dirty sand: water purification system	XXQIITAXX	755	Replicating the microbial community and water quality performance of full-scale slow sand filters in laboratory-scale filters	Sarah Haig	10.1016/j.watres.2014.05.008	ERP020510	16S rRNA	V4	FWD:GTGCCAGCMGCCGCGGTAA; REV:GGACTACHVGGGTWTCTAAT	HiSeq	ANL-Chicago	ANL	2013	150	80310	54812	58835	79488	44078	45647	34225	TRUE	TRUE	FALSE	FALSE	FALSE	718308	biofilm metagenome													2011-07-08T00:00:00Z	GAZ:Scotland	55.873	-4.284	0.3	0
755.LSSF.ALPHA.D30.14.07.11.lane1.NoIndex.L001	TGTCGCAAATAG	GTGCCAGCMGCCGCGGTAA	samples of sand from labscale_slow_sand filter with dirty sand: water purification system	XXQIITAXX	755	Replicating the microbial community and water quality performance of full-scale slow sand filters in laboratory-scale filters	Sarah Haig	10.1016/j.watres.2014.05.008	ERP020510	16S rRNA	V4	FWD:GTGCCAGCMGCCGCGGTAA; REV:GGACTACHVGGGTWTCTAAT	HiSeq	ANL-Chicago	ANL	2013	150	72758	55622	58195	71649	38483	39495	30446	TRUE	TRUE	FALSE	FALSE	FALSE	718308	biofilm metagenome													2011-07-14T00:00:00Z	GAZ:Scotland	55.873	-4.284	0.3	0
755.LSSF.ALPHA.D30.22.07.11.lane1.NoIndex.L001	TAATACGGATCG	GTGCCAGCMGCCGCGGTAA	samples of sand from labscale_slow_sand filter with dirty sand: water purification system	XXQIITAXX	755	Replicating the microbial community and water quality performance of full-scale slow sand filters in laboratory-scale filters	Sarah Haig	10.1016/j.watres.2014.05.008	ERP020510	16S rRNA	V4	FWD:GTGCCAGCMGCCGCGGTAA; REV:GGACTACHVGGGTWTCTAAT	HiSeq	ANL-Chicago	ANL	2013	150	90371	61531	66023	89038	48607	50437	37776	TRUE	TRUE	FALSE	FALSE	FALSE	718308	biofilm metagenome													2011-07-22T00:00:00Z	GAZ:Scotland	55.873	-4.284	0.3	0
755.LSSF.ALPHA.D45.08.07.11.lane1.NoIndex.L001	GTACGATATGAC	GTGCCAGCMGCCGCGGTAA	samples of sand from labscale_slow_sand filter with dirty sand: water purification system	XXQIITAXX	755	Replicating the microbial community and water quality performance of full-scale slow sand filters in laboratory-scale filters	Sarah Haig	10.1016/j.watres.2014.05.008	ERP020510	16S rRNA	V4	FWD:GTGCCAGCMGCCGCGGTAA; REV:GGACTACHVGGGTWTCTAAT	HiSeq	ANL-Chicago	ANL	2013	150	74672	51337	54883	73844	40606	41950	31292	TRUE	TRUE	FALSE	FALSE	FALSE	718308	biofilm metagenome													2011-07-08T00:00:00Z	GAZ:Scotland	55.873	-4.284	40.05	0
755.LSSF.ALPHA.D45.09.06.11.lane1.NoIndex.L001	ATCACCAGGTGT	GTGCCAGCMGCCGCGGTAA	samples of sand from labscale_slow_sand filter with dirty sand: water purification system	XXQIITAXX	755	Replicating the microbial community and water quality performance of full-scale slow sand filters in laboratory-scale filters	Sarah Haig	10.1016/j.watres.2014.05.008	ERP020510	16S rRNA	V4	FWD:GTGCCAGCMGCCGCGGTAA; REV:GGACTACHVGGGTWTCTAAT	HiSeq	ANL-Chicago	ANL	2013	150	72148	57861	60277	71147	40706	41397	30982	TRUE	TRUE	FALSE	FALSE	FALSE	718308	biofilm metagenome													2011-06-09T00:00:00Z	GAZ:Scotland	55.873	-4.284	40.05	0
755.LSSF.ALPHA.D45.14.07.11.lane1.NoIndex.L001	GTGTTGTCGTGC	GTGCCAGCMGCCGCGGTAA	samples of sand from labscale_slow_sand filter with dirty sand: water purification system	XXQIITAXX	755	Replicating the microbial community and water quality performance of full-scale slow sand filters in laboratory-scale filters	Sarah Haig	10.1016/j.watres.2014.05.008	ERP020510	16S rRNA	V4	FWD:GTGCCAGCMGCCGCGGTAA; REV:GGACTACHVGGGTWTCTAAT	HiSeq	ANL-Chicago	ANL	2013	150	76261	56551	59077	75243	40523	41639	31673	TRUE	TRUE	TRUE	TRUE	FALSE	718308	biofilm metagenome													2011-07-14T00:00:00Z	GAZ:Scotland	55.873	-4.284	40.05	0
755.LSSF.ALPHA.D45.22.07.11.lane1.NoIndex.L001	CATCCCTCTACT	GTGCCAGCMGCCGCGGTAA	samples of sand from labscale_slow_sand filter with dirty sand: water purification system	XXQIITAXX	755	Replicating the microbial community and water quality performance of full-scale slow sand filters in laboratory-scale filters	Sarah Haig	10.1016/j.watres.2014.05.008	ERP020510	16S rRNA	V4	FWD:GTGCCAGCMGCCGCGGTAA; REV:GGACTACHVGGGTWTCTAAT	HiSeq	ANL-Chicago	ANL	2013	150	84048	54612	58928	82951	46210	47503	34317	TRUE	TRUE	TRUE	FALSE	FALSE	718308	biofilm metagenome													2011-07-22T00:00:00Z	GAZ:Scotland	55.873	-4.284	40.05	0
755.LSSF.ALPHA.D5.22.07.11.lane1.NoIndex.L001	TGTAACGCCGAT	GTGCCAGCMGCCGCGGTAA	samples of sand from labscale_slow_sand filter with dirty sand: water purification system	XXQIITAXX	755	Replicating the microbial community and water quality performance of full-scale slow sand filters in laboratory-scale filters	Sarah Haig	10.1016/j.watres.2014.05.008	ERP020510	16S rRNA	V4	FWD:GTGCCAGCMGCCGCGGTAA; REV:GGACTACHVGGGTWTCTAAT	HiSeq	ANL-Chicago	ANL	2013	150	72684	54726	57437	71691	39103	40359	31903	TRUE	TRUE	FALSE	FALSE	FALSE	718308	biofilm metagenome													2011-07-22T00:00:00Z	GAZ:Scotland	55.873	-4.284	0.05	0
755.LSSF.BETA.D1.14.07.11.lane1.NoIndex.L001	TATAGGCTCCGC	GTGCCAGCMGCCGCGGTAA	samples of sand from labscale_slow_sand filter with sterile sand: water purification system	XXQIITAXX	755	Replicating the microbial community and water quality performance of full-scale slow sand filters in laboratory-scale filters	Sarah Haig	10.1016/j.watres.2014.05.008	ERP020510	16S rRNA	V4	FWD:GTGCCAGCMGCCGCGGTAA; REV:GGACTACHVGGGTWTCTAAT	HiSeq	ANL-Chicago	ANL	2013	150	96222	81246	83142	95367	55295	55886	41967	TRUE	TRUE	FALSE	FALSE	FALSE	718308	biofilm metagenome													2011-07-14T00:00:00Z	GAZ:Scotland	55.873	-4.284	0.01	0
755.LSSF.BETA.D15.14.07.11.lane1.NoIndex.L001	AGAATCCACCAC	GTGCCAGCMGCCGCGGTAA	samples of sand from labscale_slow_sand filter with sterile sand: water purification system	XXQIITAXX	755	Replicating the microbial community and water quality performance of full-scale slow sand filters in laboratory-scale filters	Sarah Haig	10.1016/j.watres.2014.05.008	ERP020510	16S rRNA	V4	FWD:GTGCCAGCMGCCGCGGTAA; REV:GGACTACHVGGGTWTCTAAT	HiSeq	ANL-Chicago	ANL	2013	150	83316	61817	64365	82124	43398	44403	34243	TRUE	TRUE	FALSE	FALSE	FALSE	718308	biofilm metagenome													2011-07-14T00:00:00Z	GAZ:Scotland	55.873	-4.284	10.05	0
755.LSSF.BETA.D15.22.07.11.lane1.NoIndex.L001	CCTTCTGTATAC	GTGCCAGCMGCCGCGGTAA	samples of sand from labscale_slow_sand filter with sterile sand: water purification system	XXQIITAXX	755	Replicating the microbial community and water quality performance of full-scale slow sand filters in laboratory-scale filters	Sarah Haig	10.1016/j.watres.2014.05.008	ERP020510	16S rRNA	V4	FWD:GTGCCAGCMGCCGCGGTAA; REV:GGACTACHVGGGTWTCTAAT	HiSeq	ANL-Chicago	ANL	2013	150	97005	61502	66147	95185	50148	51691	38043	TRUE	TRUE	FALSE	FALSE	FALSE	718308	biofilm metagenome													2011-07-22T00:00:00Z	GAZ:Scotland	55.873	-4.284	10.05	0
755.LSSF.BETA.D20.22.07.11.lane1.NoIndex.L001	CTCAAGTCAAAG	GTGCCAGCMGCCGCGGTAA	samples of sand from labscale_slow_sand filter with sterile sand: water purification system	XXQIITAXX	755	Replicating the microbial community and water quality performance of full-scale slow sand filters in laboratory-scale filters	Sarah Haig	10.1016/j.watres.2014.05.008	ERP020510	16S rRNA	V4	FWD:GTGCCAGCMGCCGCGGTAA; REV:GGACTACHVGGGTWTCTAAT	HiSeq	ANL-Chicago	ANL	2013	150	92855	65451	69408	91437	48996	50624	38966	TRUE	TRUE	FALSE	FALSE	FALSE	718308	biofilm metagenome													2011-07-22T00:00:00Z	GAZ:Scotland	55.873	-4.284	0.2	0
755.LSSF.BETA.D30.22.07.11.lane1.NoIndex.L001	AATGTCACCAGA	GTGCCAGCMGCCGCGGTAA	samples of sand from labscale_slow_sand filter with sterile sand: water purification system	XXQIITAXX	755	Replicating the microbial community and water quality performance of full-scale slow sand filters in laboratory-scale filters	Sarah Haig	10.1016/j.watres.2014.05.008	ERP020510	16S rRNA	V4	FWD:GTGCCAGCMGCCGCGGTAA; REV:GGACTACHVGGGTWTCTAAT	HiSeq	ANL-Chicago	ANL	2013	150	100472	68479	73304	98956	54401	56305	42261	TRUE	TRUE	FALSE	FALSE	FALSE	718308	biofilm metagenome													2011-07-22T00:00:00Z	GAZ:Scotland	55.873	-4.284	0.3	0
755.LSSF.BETA.D5.22.07.11.lane1.NoIndex.L001	ATCGTGTGTTGG	GTGCCAGCMGCCGCGGTAA	samples of sand from labscale_slow_sand filter with sterile sand: water purification system	XXQIITAXX	755	Replicating the microbial community and water quality performance of full-scale slow sand filters in laboratory-scale filters	Sarah Haig	10.1016/j.watres.2014.05.008	ERP020510	16S rRNA	V4	FWD:GTGCCAGCMGCCGCGGTAA; REV:GGACTACHVGGGTWTCTAAT	HiSeq	ANL-Chicago	ANL	2013	150	78929	55883	59210	77993	42887	44525	34959	TRUE	TRUE	FALSE	FALSE	FALSE	718308	biofilm metagenome													2011-07-22T00:00:00Z	GAZ:Scotland	55.873	-4.284	0.05	0
755.LSSF.DELTA.D10.08.07.11.lane1.NoIndex.L001	TCTGCGAGTCTG	GTGCCAGCMGCCGCGGTAA	samples of sand from labscale_slow_sand filter with dirty sand: water purification system	XXQIITAXX	755	Replicating the microbial community and water quality performance of full-scale slow sand filters in laboratory-scale filters	Sarah Haig	10.1016/j.watres.2014.05.008	ERP020510	16S rRNA	V4	FWD:GTGCCAGCMGCCGCGGTAA; REV:GGACTACHVGGGTWTCTAAT	HiSeq	ANL-Chicago	ANL	2013	150	78712	57191	60278	77616	41875	43379	33304	TRUE	TRUE	FALSE	FALSE	FALSE	718308	biofilm metagenome													2011-07-08T00:00:00Z	GAZ:Scotland	55.873	-4.284	0.1	0
755.LSSF.DELTA.D10.23.06.11.lane1.NoIndex.L001	TTCAGACCAGCC	GTGCCAGCMGCCGCGGTAA	samples of sand from labscale_slow_sand filter with dirty sand: water purification system	XXQIITAXX	755	Replicating the microbial community and water quality performance of full-scale slow sand filters in laboratory-scale filters	Sarah Haig	10.1016/j.watres.2014.05.008	ERP020510	16S rRNA	V4	FWD:GTGCCAGCMGCCGCGGTAA; REV:GGACTACHVGGGTWTCTAAT	HiSeq	ANL-Chicago	ANL	2013	150	75792	54182	57176	74821	41166	42020	31060	TRUE	TRUE	FALSE	FALSE	FALSE	718308	biofilm metagenome													2011-06-23T00:00:00Z	GAZ:Scotland	55.873	-4.284	0.1	0
755.LSSF.DELTA.D10.30.06.11.lane1.NoIndex.L001	GGTCCCGAAATT	GTGCCAGCMGCCGCGGTAA	samples of sand from labscale_slow_sand filter with dirty sand: water purification system	XXQIITAXX	755	Replicating the microbial community and water quality performance of full-scale slow sand filters in laboratory-scale filters	Sarah Haig	10.1016/j.watres.2014.05.008	ERP020510	16S rRNA	V4	FWD:GTGCCAGCMGCCGCGGTAA; REV:GGACTACHVGGGTWTCTAAT	HiSeq	ANL-Chicago	ANL	2013	150	71429	56169	58426	70459	36874	37847	29096	TRUE	TRUE	FALSE	FALSE	FALSE	718308	biofilm metagenome													2011-06-30T00:00:00Z	GAZ:Scotland	55.873	-4.284	0.1	0
755.LSSF.DELTA.D15.16.06.11.lane1.NoIndex.L001	ACCCGGATTTCG	GTGCCAGCMGCCGCGGTAA	samples of sand from labscale_slow_sand filter with dirty sand: water purification system	XXQIITAXX	755	Replicating the microbial community and water quality performance of full-scale slow sand filters in laboratory-scale filters	Sarah Haig	10.1016/j.watres.2014.05.008	ERP020510	16S rRNA	V4	FWD:GTGCCAGCMGCCGCGGTAA; REV:GGACTACHVGGGTWTCTAAT	HiSeq	ANL-Chicago	ANL	2013	150	73545	50434	53727	72345	38791	39985	29542	TRUE	TRUE	FALSE	FALSE	FALSE	718308	biofilm metagenome													2011-06-16T00:00:00Z	GAZ:Scotland	55.873	-4.284	10.05	0
755.LSSF.DELTA.D15.23.06.11.lane1.NoIndex.L001	CGCTTGTGTAGC	GTGCCAGCMGCCGCGGTAA	samples of sand from labscale_slow_sand filter with dirty sand: water purification system	XXQIITAXX	755	Replicating the microbial community and water quality performance of full-scale slow sand filters in laboratory-scale filters	Sarah Haig	10.1016/j.watres.2014.05.008	ERP020510	16S rRNA	V4	FWD:GTGCCAGCMGCCGCGGTAA; REV:GGACTACHVGGGTWTCTAAT	HiSeq	ANL-Chicago	ANL	2013	150	70496	48005	50973	69445	39520	40527	29478	TRUE	TRUE	FALSE	FALSE	FALSE	718308	biofilm metagenome													2011-06-23T00:00:00Z	GAZ:Scotland	55.873	-4.284	10.05	0
755.LSSF.DELTA.D20.02.06.11.lane1.NoIndex.L001	AGTAGACTTACG	GTGCCAGCMGCCGCGGTAA	samples of sand from labscale_slow_sand filter with dirty sand: water purification system	XXQIITAXX	755	Replicating the microbial community and water quality performance of full-scale slow sand filters in laboratory-scale filters	Sarah Haig	10.1016/j.watres.2014.05.008	ERP020510	16S rRNA	V4	FWD:GTGCCAGCMGCCGCGGTAA; REV:GGACTACHVGGGTWTCTAAT	HiSeq	ANL-Chicago	ANL	2013	150	56341	47068	48309	56026	36906	36869	14088	TRUE	TRUE	FALSE	FALSE	FALSE	718308	biofilm metagenome													2011-06-02T00:00:00Z	GAZ:Scotland	55.873	-4.284	0.2	0
755.LSSF.DELTA.D20.23.06.11.lane1.NoIndex.L001	CGTCCGTATGAA	GTGCCAGCMGCCGCGGTAA	samples of sand from labscale_slow_sand filter with dirty sand: water purification system	XXQIITAXX	755	Replicating the microbial community and water quality performance of full-scale slow sand filters in laboratory-scale filters	Sarah Haig	10.1016/j.watres.2014.05.008	ERP020510	16S rRNA	V4	FWD:GTGCCAGCMGCCGCGGTAA; REV:GGACTACHVGGGTWTCTAAT	HiSeq	ANL-Chicago	ANL	2013	150	80057	51195	55623	78914	43971	45069	33061	TRUE	TRUE	FALSE	FALSE	FALSE	718308	biofilm metagenome													2011-06-23T00:00:00Z	GAZ:Scotland	55.873	-4.284	0.2	0
755.LSSF.DELTA.D30.02.06.11.lane1.NoIndex.L001	GAATGACGTTTG	GTGCCAGCMGCCGCGGTAA	samples of sand from labscale_slow_sand filter with dirty sand: water purification system	XXQIITAXX	755	Replicating the microbial community and water quality performance of full-scale slow sand filters in laboratory-scale filters	Sarah Haig	10.1016/j.watres.2014.05.008	ERP020510	16S rRNA	V4	FWD:GTGCCAGCMGCCGCGGTAA; REV:GGACTACHVGGGTWTCTAAT	HiSeq	ANL-Chicago	ANL	2013	150	59852	49118	50592	59480	39190	39277	17704	TRUE	TRUE	FALSE	FALSE	FALSE	718308	biofilm metagenome													2011-06-02T00:00:00Z	GAZ:Scotland	55.873	-4.284	0.3	0
755.LSSF.DELTA.D30.08.07.11.lane1.NoIndex.L001	TGCATACACTGG	GTGCCAGCMGCCGCGGTAA	samples of sand from labscale_slow_sand filter with dirty sand: water purification system	XXQIITAXX	755	Replicating the microbial community and water quality performance of full-scale slow sand filters in laboratory-scale filters	Sarah Haig	10.1016/j.watres.2014.05.008	ERP020510	16S rRNA	V4	FWD:GTGCCAGCMGCCGCGGTAA; REV:GGACTACHVGGGTWTCTAAT	HiSeq	ANL-Chicago	ANL	2013	150	77844	51600	55339	77032	44037	45496	34110	TRUE	TRUE	FALSE	FALSE	FALSE	718308	biofilm metagenome													2011-07-08T00:00:00Z	GAZ:Scotland	55.873	-4.284	0.3	0
755.LSSF.DELTA.D30.16.06.11.lane1.NoIndex.L001	ACGCCTTTCTTA	GTGCCAGCMGCCGCGGTAA	samples of sand from labscale_slow_sand filter with dirty sand: water purification system	XXQIITAXX	755	Replicating the microbial community and water quality performance of full-scale slow sand filters in laboratory-scale filters	Sarah Haig	10.1016/j.watres.2014.05.008	ERP020510	16S rRNA	V4	FWD:GTGCCAGCMGCCGCGGTAA; REV:GGACTACHVGGGTWTCTAAT	HiSeq	ANL-Chicago	ANL	2013	150	87152	57583	61780	86072	47309	48770	35106	TRUE	TRUE	FALSE	FALSE	FALSE	718308	biofilm metagenome													2011-06-16T00:00:00Z	GAZ:Scotland	55.873	-4.284	0.3	0
755.LSSF.DELTA.D30.22.07.11.lane1.NoIndex.L001	GCGTTCTAGCTG	GTGCCAGCMGCCGCGGTAA	samples of sand from labscale_slow_sand filter with dirty sand: water purification system	XXQIITAXX	755	Replicating the microbial community and water quality performance of full-scale slow sand filters in laboratory-scale filters	Sarah Haig	10.1016/j.watres.2014.05.008	ERP020510	16S rRNA	V4	FWD:GTGCCAGCMGCCGCGGTAA; REV:GGACTACHVGGGTWTCTAAT	HiSeq	ANL-Chicago	ANL	2013	150	74861	46418	50085	73752	40984	41895	30080	TRUE	TRUE	FALSE	FALSE	FALSE	718308	biofilm metagenome													2011-07-22T00:00:00Z	GAZ:Scotland	55.873	-4.284	0.3	0
755.LSSF.DELTA.D30.23.06.11.lane1.NoIndex.L001	CCGCGATTTCGA	GTGCCAGCMGCCGCGGTAA	samples of sand from labscale_slow_sand filter with dirty sand: water purification system	XXQIITAXX	755	Replicating the microbial community and water quality performance of full-scale slow sand filters in laboratory-scale filters	Sarah Haig	10.1016/j.watres.2014.05.008	ERP020510	16S rRNA	V4	FWD:GTGCCAGCMGCCGCGGTAA; REV:GGACTACHVGGGTWTCTAAT	HiSeq	ANL-Chicago	ANL	2013	150	77681	47910	52330	76472	42774	43778	31437	TRUE	TRUE	FALSE	FALSE	FALSE	718308	biofilm metagenome													2011-06-23T00:00:00Z	GAZ:Scotland	55.873	-4.284	0.3	0
755.LSSF.DELTA.D30.26.05.11.lane1.NoIndex.L001	CACGGTCCTATG	GTGCCAGCMGCCGCGGTAA	samples of sand from labscale_slow_sand filter with dirty sand: water purification system	XXQIITAXX	755	Replicating the microbial community and water quality performance of full-scale slow sand filters in laboratory-scale filters	Sarah Haig	10.1016/j.watres.2014.05.008	ERP020510	16S rRNA	V4	FWD:GTGCCAGCMGCCGCGGTAA; REV:GGACTACHVGGGTWTCTAAT	HiSeq	ANL-Chicago	ANL	2013	150	62638	48254	50080	62058	36990	37295	24753	TRUE	TRUE	FALSE	FALSE	FALSE	718308	biofilm metagenome													2011-05-26T00:00:00Z	GAZ:Scotland	55.873	-4.284	0.3	0
755.LSSF.DELTA.D30.30.06.11.lane1.NoIndex.L001	CGATTAGGAATC	GTGCCAGCMGCCGCGGTAA	samples of sand from labscale_slow_sand filter with dirty sand: water purification system	XXQIITAXX	755	Replicating the microbial community and water quality performance of full-scale slow sand filters in laboratory-scale filters	Sarah Haig	10.1016/j.watres.2014.05.008	ERP020510	16S rRNA	V4	FWD:GTGCCAGCMGCCGCGGTAA; REV:GGACTACHVGGGTWTCTAAT	HiSeq	ANL-Chicago	ANL	2013	150	75780	59898	62458	74712	41376	42490	32429	TRUE	TRUE	FALSE	FALSE	FALSE	718308	biofilm metagenome													2011-06-30T00:00:00Z	GAZ:Scotland	55.873	-4.284	0.3	0
755.LSSF.DELTA.D45.08.07.11.lane1.NoIndex.L001	GCGATATATCGC	GTGCCAGCMGCCGCGGTAA	samples of sand from labscale_slow_sand filter with dirty sand: water purification system	XXQIITAXX	755	Replicating the microbial community and water quality performance of full-scale slow sand filters in laboratory-scale filters	Sarah Haig	10.1016/j.watres.2014.05.008	ERP020510	16S rRNA	V4	FWD:GTGCCAGCMGCCGCGGTAA; REV:GGACTACHVGGGTWTCTAAT	HiSeq	ANL-Chicago	ANL	2013	150	47325	32618	34816	46944	27728	28684	21631	TRUE	TRUE	FALSE	FALSE	FALSE	718308	biofilm metagenome													2011-07-08T00:00:00Z	GAZ:Scotland	55.873	-4.284	40.05	0
755.LSSF.DELTA.D45.14.07.11.lane1.NoIndex.L001	AGTCGAACGAGG	GTGCCAGCMGCCGCGGTAA	samples of sand from labscale_slow_sand filter with dirty sand: water purification system	XXQIITAXX	755	Replicating the microbial community and water quality performance of full-scale slow sand filters in laboratory-scale filters	Sarah Haig	10.1016/j.watres.2014.05.008	ERP020510	16S rRNA	V4	FWD:GTGCCAGCMGCCGCGGTAA; REV:GGACTACHVGGGTWTCTAAT	HiSeq	ANL-Chicago	ANL	2013	150	83238	63390	66016	82444	46548	47894	36956	TRUE	TRUE	FALSE	FALSE	FALSE	718308	biofilm metagenome													2011-07-14T00:00:00Z	GAZ:Scotland	55.873	-4.284	40.05	0
755.LSSF.DELTA.D45.16.06.11.lane1.NoIndex.L001	GCAGCCATATTG	GTGCCAGCMGCCGCGGTAA	samples of sand from labscale_slow_sand filter with dirty sand: water purification system	XXQIITAXX	755	Replicating the microbial community and water quality performance of full-scale slow sand filters in laboratory-scale filters	Sarah Haig	10.1016/j.watres.2014.05.008	ERP020510	16S rRNA	V4	FWD:GTGCCAGCMGCCGCGGTAA; REV:GGACTACHVGGGTWTCTAAT	HiSeq	ANL-Chicago	ANL	2013	150	81312	50838	55319	80125	44208	45504	32456	TRUE	TRUE	FALSE	FALSE	FALSE	718308	biofilm metagenome													2011-06-16T00:00:00Z	GAZ:Scotland	55.873	-4.284	40.05	0
755.LSSF.DELTA.D45.22.07.11.lane1.NoIndex.L001	GCTGTACGGATT	GTGCCAGCMGCCGCGGTAA	samples of sand from labscale_slow_sand filter with dirty sand: water purification system	XXQIITAXX	755	Replicating the microbial community and water quality performance of full-scale slow sand filters in laboratory-scale filters	Sarah Haig	10.1016/j.watres.2014.05.008	ERP020510	16S rRNA	V4	FWD:GTGCCAGCMGCCGCGGTAA; REV:GGACTACHVGGGTWTCTAAT	HiSeq	ANL-Chicago	ANL	2013	150	84433	53605	57813	83211	46098	47267	34404	TRUE	TRUE	FALSE	FALSE	FALSE	718308	biofilm metagenome													2011-07-22T00:00:00Z	GAZ:Scotland	55.873	-4.284	40.05	0
755.LSSF.DELTA.D45.23.06.11.lane1.NoIndex.L001	TTGGTGCCTGTG	GTGCCAGCMGCCGCGGTAA	samples of sand from labscale_slow_sand filter with dirty sand: water purification system	XXQIITAXX	755	Replicating the microbial community and water quality performance of full-scale slow sand filters in laboratory-scale filters	Sarah Haig	10.1016/j.watres.2014.05.008	ERP020510	16S rRNA	V4	FWD:GTGCCAGCMGCCGCGGTAA; REV:GGACTACHVGGGTWTCTAAT	HiSeq	ANL-Chicago	ANL	2013	150	77514	47544	51963	76395	43221	44273	31806	TRUE	TRUE	FALSE	FALSE	FALSE	718308	biofilm metagenome													2011-06-23T00:00:00Z	GAZ:Scotland	55.873	-4.284	40.05	0
755.LSSF.EPSILON.D20.22.07.11.lane1.NoIndex.L001	CAACTCCCGTGA	GTGCCAGCMGCCGCGGTAA	samples of sand from labscale_slow_sand filter with sterile sand: water purification system	XXQIITAXX	755	Replicating the microbial community and water quality performance of full-scale slow sand filters in laboratory-scale filters	Sarah Haig	10.1016/j.watres.2014.05.008	ERP020510	16S rRNA	V4	FWD:GTGCCAGCMGCCGCGGTAA; REV:GGACTACHVGGGTWTCTAAT	HiSeq	ANL-Chicago	ANL	2013	150	110633	92619	95161	109587	59146	60599	48928	TRUE	TRUE	FALSE	FALSE	FALSE	718308	biofilm metagenome													2011-07-22T00:00:00Z	GAZ:Scotland	55.873	-4.284	0.2	0
755.SSFA.L1.2.D10.21.06.11.lane1.NoIndex.L001	CAACGCTAGAAT	GTGCCAGCMGCCGCGGTAA	samples of sand from slow_sand filter water purification system	XXQIITAXX	755	Replicating the microbial community and water quality performance of full-scale slow sand filters in laboratory-scale filters	Sarah Haig	10.1016/j.watres.2014.05.008	ERP020510	16S rRNA	V4	FWD:GTGCCAGCMGCCGCGGTAA; REV:GGACTACHVGGGTWTCTAAT	HiSeq	ANL-Chicago	ANL	2013	150	67686	45905	49022	66770	37594	38556	28585	TRUE	TRUE	FALSE	FALSE	FALSE	718308	biofilm metagenome													2011-06-21T00:00:00Z	GAZ:Scotland	55.906	-3.204	0.1	0
755.SSFA.L1.2.D20.21.06.11.lane1.NoIndex.L001	CATAAGGGAGGC	GTGCCAGCMGCCGCGGTAA	samples of sand from slow_sand filter water purification system	XXQIITAXX	755	Replicating the microbial community and water quality performance of full-scale slow sand filters in laboratory-scale filters	Sarah Haig	10.1016/j.watres.2014.05.008	ERP020510	16S rRNA	V4	FWD:GTGCCAGCMGCCGCGGTAA; REV:GGACTACHVGGGTWTCTAAT	HiSeq	ANL-Chicago	ANL	2013	150	78695	52030	55819	77498	43128	44330	32660	TRUE	TRUE	FALSE	FALSE	FALSE	718308	biofilm metagenome													2011-06-21T00:00:00Z	GAZ:Scotland	55.906	-3.204	0.2	0
755.SSFA.L1.2.D3.21.06.11.lane1.NoIndex.L001	CCATCACATAGG	GTGCCAGCMGCCGCGGTAA	samples of sand from slow_sand filter water purification system	XXQIITAXX	755	Replicating the microbial community and water quality performance of full-scale slow sand filters in laboratory-scale filters	Sarah Haig	10.1016/j.watres.2014.05.008	ERP020510	16S rRNA	V4	FWD:GTGCCAGCMGCCGCGGTAA; REV:GGACTACHVGGGTWTCTAAT	HiSeq	ANL-Chicago	ANL	2013	150	86206	58401	62536	85031	47549	48880	36532	TRUE	TRUE	FALSE	FALSE	FALSE	718308	biofilm metagenome													2011-06-21T00:00:00Z	GAZ:Scotland	55.906	-3.204	0.03	0
755.SSFA.L1.2.D30.21.06.11.lane1.NoIndex.L001	AAGAGTCTCTAG	GTGCCAGCMGCCGCGGTAA	samples of sand from slow_sand filter water purification system	XXQIITAXX	755	Replicating the microbial community and water quality performance of full-scale slow sand filters in laboratory-scale filters	Sarah Haig	10.1016/j.watres.2014.05.008	ERP020510	16S rRNA	V4	FWD:GTGCCAGCMGCCGCGGTAA; REV:GGACTACHVGGGTWTCTAAT	HiSeq	ANL-Chicago	ANL	2013	150	93409	64101	68033	92170	51910	53408	40341	TRUE	TRUE	FALSE	FALSE	FALSE	718308	biofilm metagenome													2011-06-21T00:00:00Z	GAZ:Scotland	55.906	-3.204	0.3	0
755.SSFA.L1.2.D40.21.06.11.lane1.NoIndex.L001	CGATGAATATCG	GTGCCAGCMGCCGCGGTAA	samples of sand from slow_sand filter water purification system	XXQIITAXX	755	Replicating the microbial community and water quality performance of full-scale slow sand filters in laboratory-scale filters	Sarah Haig	10.1016/j.watres.2014.05.008	ERP020510	16S rRNA	V4	FWD:GTGCCAGCMGCCGCGGTAA; REV:GGACTACHVGGGTWTCTAAT	HiSeq	ANL-Chicago	ANL	2013	150	52227	35031	37251	51645	30146	30778	22980	TRUE	TRUE	FALSE	FALSE	FALSE	718308	biofilm metagenome													2011-06-21T00:00:00Z	GAZ:Scotland	55.906	-3.204	0.4	0
755.SSFA.L1.2.D50.21.06.11.lane1.NoIndex.L001	CTATGCCGGCTA	GTGCCAGCMGCCGCGGTAA	samples of sand from slow_sand filter water purification system	XXQIITAXX	755	Replicating the microbial community and water quality performance of full-scale slow sand filters in laboratory-scale filters	Sarah Haig	10.1016/j.watres.2014.05.008	ERP020510	16S rRNA	V4	FWD:GTGCCAGCMGCCGCGGTAA; REV:GGACTACHVGGGTWTCTAAT	HiSeq	ANL-Chicago	ANL	2013	150	67419	45480	48099	66543	37805	38865	28986	TRUE	TRUE	FALSE	FALSE	FALSE	718308	biofilm metagenome													2011-06-21T00:00:00Z	GAZ:Scotland	55.906	-3.204	0.5	0
755.SSFA.L1.3.D1.21.06.11.lane1.NoIndex.L001	ACGTGGTTCCAC	GTGCCAGCMGCCGCGGTAA	samples of sand from slow_sand filter water purification system	XXQIITAXX	755	Replicating the microbial community and water quality performance of full-scale slow sand filters in laboratory-scale filters	Sarah Haig	10.1016/j.watres.2014.05.008	ERP020510	16S rRNA	V4	FWD:GTGCCAGCMGCCGCGGTAA; REV:GGACTACHVGGGTWTCTAAT	HiSeq	ANL-Chicago	ANL	2013	150	81413	54785	58197	80346	45021	46139	34181	TRUE	TRUE	FALSE	FALSE	FALSE	718308	biofilm metagenome													2011-06-21T00:00:00Z	GAZ:Scotland	55.906	-3.204	0.01	0
755.SSFA.L1.3.D10.21.06.11.lane1.NoIndex.L001	TCTGTAGAGCCA	GTGCCAGCMGCCGCGGTAA	samples of sand from slow_sand filter water purification system	XXQIITAXX	755	Replicating the microbial community and water quality performance of full-scale slow sand filters in laboratory-scale filters	Sarah Haig	10.1016/j.watres.2014.05.008	ERP020510	16S rRNA	V4	FWD:GTGCCAGCMGCCGCGGTAA; REV:GGACTACHVGGGTWTCTAAT	HiSeq	ANL-Chicago	ANL	2013	150	80814	54200	57961	79589	44224	45282	33069	TRUE	TRUE	FALSE	FALSE	FALSE	718308	biofilm metagenome													2011-06-21T00:00:00Z	GAZ:Scotland	55.906	-3.204	0.1	0
755.SSFA.L1.3.D20.21.06.11.lane1.NoIndex.L001	GGTACCTGCAAT	GTGCCAGCMGCCGCGGTAA	samples of sand from slow_sand filter water purification system	XXQIITAXX	755	Replicating the microbial community and water quality performance of full-scale slow sand filters in laboratory-scale filters	Sarah Haig	10.1016/j.watres.2014.05.008	ERP020510	16S rRNA	V4	FWD:GTGCCAGCMGCCGCGGTAA; REV:GGACTACHVGGGTWTCTAAT	HiSeq	ANL-Chicago	ANL	2013	150	64920	43478	46374	64101	35514	36421	26670	TRUE	TRUE	FALSE	FALSE	FALSE	718308	biofilm metagenome													2011-06-21T00:00:00Z	GAZ:Scotland	55.906	-3.204	0.2	0
755.SSFA.L1.3.D3.21.06.11.lane1.NoIndex.L001	GAACCTATGACA	GTGCCAGCMGCCGCGGTAA	samples of sand from slow_sand filter water purification system	XXQIITAXX	755	Replicating the microbial community and water quality performance of full-scale slow sand filters in laboratory-scale filters	Sarah Haig	10.1016/j.watres.2014.05.008	ERP020510	16S rRNA	V4	FWD:GTGCCAGCMGCCGCGGTAA; REV:GGACTACHVGGGTWTCTAAT	HiSeq	ANL-Chicago	ANL	2013	150	79832	55294	58448	78772	45173	46150	34513	TRUE	TRUE	FALSE	FALSE	FALSE	718308	biofilm metagenome													2011-06-21T00:00:00Z	GAZ:Scotland	55.906	-3.204	0.03	0
755.SSFA.L1.3.D30.21.06.11.lane1.NoIndex.L001	AGATCTATGCAG	GTGCCAGCMGCCGCGGTAA	samples of sand from slow_sand filter water purification system	XXQIITAXX	755	Replicating the microbial community and water quality performance of full-scale slow sand filters in laboratory-scale filters	Sarah Haig	10.1016/j.watres.2014.05.008	ERP020510	16S rRNA	V4	FWD:GTGCCAGCMGCCGCGGTAA; REV:GGACTACHVGGGTWTCTAAT	HiSeq	ANL-Chicago	ANL	2013	150	105918	71795	76100	104645	59506	61527	46458	TRUE	TRUE	TRUE	FALSE	FALSE	718308	biofilm metagenome													2011-06-21T00:00:00Z	GAZ:Scotland	55.906	-3.204	0.3	0
755.SSFA.L1.3.D5.21.06.11.lane1.NoIndex.L001	GGAGAGATCACG	GTGCCAGCMGCCGCGGTAA	samples of sand from slow_sand filter water purification system	XXQIITAXX	755	Replicating the microbial community and water quality performance of full-scale slow sand filters in laboratory-scale filters	Sarah Haig	10.1016/j.watres.2014.05.008	ERP020510	16S rRNA	V4	FWD:GTGCCAGCMGCCGCGGTAA; REV:GGACTACHVGGGTWTCTAAT	HiSeq	ANL-Chicago	ANL	2013	150	89346	61179	65113	88270	49848	51162	38247	TRUE	TRUE	FALSE	FALSE	FALSE	718308	biofilm metagenome													2011-06-21T00:00:00Z	GAZ:Scotland	55.906	-3.204	0.05	0
755.SSFA.L1.D1.03.05.11.lane1.NoIndex.L001	TGGTTGGTTACG	GTGCCAGCMGCCGCGGTAA	samples of sand from slow_sand filter water purification system	XXQIITAXX	755	Replicating the microbial community and water quality performance of full-scale slow sand filters in laboratory-scale filters	Sarah Haig	10.1016/j.watres.2014.05.008	ERP020510	16S rRNA	V4	FWD:GTGCCAGCMGCCGCGGTAA; REV:GGACTACHVGGGTWTCTAAT	HiSeq	ANL-Chicago	ANL	2013	150	79471	49945	53913	78047	43744	44854	31559	TRUE	TRUE	FALSE	FALSE	FALSE	718308	biofilm metagenome													2011-05-03T00:00:00Z	GAZ:Scotland	55.906	-3.204	0.01	0
755.SSFA.L1.D1.07.06.11.lane1.NoIndex.L001	CTCTCTCACTTG	GTGCCAGCMGCCGCGGTAA	samples of sand from slow_sand filter water purification system	XXQIITAXX	755	Replicating the microbial community and water quality performance of full-scale slow sand filters in laboratory-scale filters	Sarah Haig	10.1016/j.watres.2014.05.008	ERP020510	16S rRNA	V4	FWD:GTGCCAGCMGCCGCGGTAA; REV:GGACTACHVGGGTWTCTAAT	HiSeq	ANL-Chicago	ANL	2013	150	94858	64634	69361	93983	54872	56579	42669	TRUE	TRUE	FALSE	FALSE	FALSE	718308	biofilm metagenome													2011-06-07T00:00:00Z	GAZ:Scotland	55.906	-3.204	0.01	0
755.SSFA.L1.D1.07.06.11.lane1.NoIndex.L001	CTCTCTCACTTG	GTGCCAGCMGCCGCGGTAA	samples of sand from slow_sand filter water purification system	XXQIITAXX	755	Replicating the microbial community and water quality performance of full-scale slow sand filters in laboratory-scale filters	Sarah Haig	10.1016/j.watres.2014.05.008	ERP020510	16S rRNA	V4	FWD:GTGCCAGCMGCCGCGGTAA; REV:GGACTACHVGGGTWTCTAAT	HiSeq	ANL-Chicago	ANL	2013	150	94858	64634	69361	93983	54872	56579	42669	TRUE	TRUE	FALSE	FALSE	FALSE	718308	biofilm metagenome													2011-06-07T00:00:00Z	GAZ:Scotland	55.906	-3.204	0.01	0
755.SSFA.L1.D1.10.05.11.lane1.NoIndex.L001	GAACGGGACGTA	GTGCCAGCMGCCGCGGTAA	samples of sand from slow_sand filter water purification system	XXQIITAXX	755	Replicating the microbial community and water quality performance of full-scale slow sand filters in laboratory-scale filters	Sarah Haig	10.1016/j.watres.2014.05.008	ERP020510	16S rRNA	V4	FWD:GTGCCAGCMGCCGCGGTAA; REV:GGACTACHVGGGTWTCTAAT	HiSeq	ANL-Chicago	ANL	2013	150	104086	66406	71380	102561	56226	57469	41502	TRUE	TRUE	FALSE	FALSE	FALSE	718308	biofilm metagenome													2011-05-11T00:00:00Z	GAZ:Scotland	55.906	-3.204	0.01	0
755.SSFA.L1.D1.14.06.11.lane1.NoIndex.L001	CCTCTGAGAGCT	GTGCCAGCMGCCGCGGTAA	samples of sand from slow_sand filter water purification system	XXQIITAXX	755	Replicating the microbial community and water quality performance of full-scale slow sand filters in laboratory-scale filters	Sarah Haig	10.1016/j.watres.2014.05.008	ERP020510	16S rRNA	V4	FWD:GTGCCAGCMGCCGCGGTAA; REV:GGACTACHVGGGTWTCTAAT	HiSeq	ANL-Chicago	ANL	2013	150	90227	59253	63554	88959	49938	51184	37379	TRUE	TRUE	FALSE	FALSE	FALSE	718308	biofilm metagenome													2011-06-14T00:00:00Z	GAZ:Scotland	55.906	-3.204	0.01	0
755.SSFA.L1.D1.17.05.11.lane1.NoIndex.L001	TAAAGACCCGTA	GTGCCAGCMGCCGCGGTAA	samples of sand from slow_sand filter water purification system	XXQIITAXX	755	Replicating the microbial community and water quality performance of full-scale slow sand filters in laboratory-scale filters	Sarah Haig	10.1016/j.watres.2014.05.008	ERP020510	16S rRNA	V4	FWD:GTGCCAGCMGCCGCGGTAA; REV:GGACTACHVGGGTWTCTAAT	HiSeq	ANL-Chicago	ANL	2013	150	34564	27074	28079	34333	21342	21432	16577	TRUE	TRUE	FALSE	FALSE	FALSE	718308	biofilm metagenome													2011-05-17T00:00:00Z	GAZ:Scotland	55.906	-3.204	0.01	0
755.SSFA.L1.D1.19.07.11.lane1.NoIndex.L001	ACCGTCTTTCTC	GTGCCAGCMGCCGCGGTAA	samples of sand from slow_sand filter water purification system	XXQIITAXX	755	Replicating the microbial community and water quality performance of full-scale slow sand filters in laboratory-scale filters	Sarah Haig	10.1016/j.watres.2014.05.008	ERP020510	16S rRNA	V4	FWD:GTGCCAGCMGCCGCGGTAA; REV:GGACTACHVGGGTWTCTAAT	HiSeq	ANL-Chicago	ANL	2013	150	85278	53695	58099	84236	48500	49678	35904	TRUE	TRUE	FALSE	FALSE	FALSE	718308	biofilm metagenome													2011-07-19T00:00:00Z	GAZ:Scotland	55.906	-3.204	0.01	0
755.SSFA.L1.D1.21.06.11.lane1.NoIndex.L001	CCAATCGTGCAA	GTGCCAGCMGCCGCGGTAA	samples of sand from slow_sand filter water purification system	XXQIITAXX	755	Replicating the microbial community and water quality performance of full-scale slow sand filters in laboratory-scale filters	Sarah Haig	10.1016/j.watres.2014.05.008	ERP020510	16S rRNA	V4	FWD:GTGCCAGCMGCCGCGGTAA; REV:GGACTACHVGGGTWTCTAAT	HiSeq	ANL-Chicago	ANL	2013	150	60398	38532	41217	59422	32622	33192	23927	TRUE	TRUE	FALSE	FALSE	FALSE	718308	biofilm metagenome													2011-06-21T00:00:00Z	GAZ:Scotland	55.906	-3.204	0.01	0
755.SSFA.L1.D1.31.05.11.lane1.NoIndex.L001	TTATGGTACGGA	GTGCCAGCMGCCGCGGTAA	samples of sand from slow_sand filter water purification system	XXQIITAXX	755	Replicating the microbial community and water quality performance of full-scale slow sand filters in laboratory-scale filters	Sarah Haig	10.1016/j.watres.2014.05.008	ERP020510	16S rRNA	V4	FWD:GTGCCAGCMGCCGCGGTAA; REV:GGACTACHVGGGTWTCTAAT	HiSeq	ANL-Chicago	ANL	2013	150	93982	70949	73593	93042	54229	54893	42172	TRUE	TRUE	FALSE	FALSE	FALSE	718308	biofilm metagenome													2011-05-31T00:00:00Z	GAZ:Scotland	55.906	-3.204	0.01	0
755.SSFA.L1.D10.07.06.11.lane1.NoIndex.L001	AACTCCTGTGGA	GTGCCAGCMGCCGCGGTAA	samples of sand from slow_sand filter water purification system	XXQIITAXX	755	Replicating the microbial community and water quality performance of full-scale slow sand filters in laboratory-scale filters	Sarah Haig	10.1016/j.watres.2014.05.008	ERP020510	16S rRNA	V4	FWD:GTGCCAGCMGCCGCGGTAA; REV:GGACTACHVGGGTWTCTAAT	HiSeq	ANL-Chicago	ANL	2013	150	90886	61502	66077	90078	52560	54148	40756	TRUE	TRUE	FALSE	FALSE	FALSE	718308	biofilm metagenome													2011-06-07T00:00:00Z	GAZ:Scotland	55.906	-3.204	0.1	0
755.SSFA.L1.D10.10.05.11.lane1.NoIndex.L001	ATTCTCTCACGT	GTGCCAGCMGCCGCGGTAA	samples of sand from slow_sand filter water purification system	XXQIITAXX	755	Replicating the microbial community and water quality performance of full-scale slow sand filters in laboratory-scale filters	Sarah Haig	10.1016/j.watres.2014.05.008	ERP020510	16S rRNA	V4	FWD:GTGCCAGCMGCCGCGGTAA; REV:GGACTACHVGGGTWTCTAAT	HiSeq	ANL-Chicago	ANL	2013	150	116309	74198	79635	114704	62964	64378	47051	TRUE	TRUE	FALSE	FALSE	FALSE	718308	biofilm metagenome													2011-05-11T00:00:00Z	GAZ:Scotland	55.906	-3.204	0.1	0
755.SSFA.L1.D10.14.06.11.lane1.NoIndex.L001	TCGGCGATCATC	GTGCCAGCMGCCGCGGTAA	samples of sand from slow_sand filter water purification system	XXQIITAXX	755	Replicating the microbial community and water quality performance of full-scale slow sand filters in laboratory-scale filters	Sarah Haig	10.1016/j.watres.2014.05.008	ERP020510	16S rRNA	V4	FWD:GTGCCAGCMGCCGCGGTAA; REV:GGACTACHVGGGTWTCTAAT	HiSeq	ANL-Chicago	ANL	2013	150	98972	64565	69010	97405	53940	55255	40409	TRUE	TRUE	FALSE	FALSE	FALSE	718308	biofilm metagenome													2011-06-14T00:00:00Z	GAZ:Scotland	55.906	-3.204	0.1	0
755.SSFA.L1.D10.18.10.11.lane1.NoIndex.L001	TACGCCCATCAG	GTGCCAGCMGCCGCGGTAA	samples of sand from slow_sand filter water purification system	XXQIITAXX	755	Replicating the microbial community and water quality performance of full-scale slow sand filters in laboratory-scale filters	Sarah Haig	10.1016/j.watres.2014.05.008	ERP020510	16S rRNA	V4	FWD:GTGCCAGCMGCCGCGGTAA; REV:GGACTACHVGGGTWTCTAAT	HiSeq	ANL-Chicago	ANL	2013	150	72628	43178	46867	71491	42181	42338	28935	TRUE	TRUE	FALSE	FALSE	FALSE	718308	biofilm metagenome													2011-10-18T00:00:00Z	GAZ:Scotland	55.906	-3.204	0.1	0
755.SSFA.L1.D10.21.06.11.lane1.NoIndex.L001	TAGTGTCGGATC	GTGCCAGCMGCCGCGGTAA	samples of sand from slow_sand filter water purification system	XXQIITAXX	755	Replicating the microbial community and water quality performance of full-scale slow sand filters in laboratory-scale filters	Sarah Haig	10.1016/j.watres.2014.05.008	ERP020510	16S rRNA	V4	FWD:GTGCCAGCMGCCGCGGTAA; REV:GGACTACHVGGGTWTCTAAT	HiSeq	ANL-Chicago	ANL	2013	150	61416	38859	41760	60479	32992	33551	23882	TRUE	TRUE	FALSE	FALSE	FALSE	718308	biofilm metagenome													2011-06-21T00:00:00Z	GAZ:Scotland	55.906	-3.204	0.1	0
755.SSFA.L1.D10.31.05.11.lane1.NoIndex.L001	TCCATCGACGTG	GTGCCAGCMGCCGCGGTAA	samples of sand from slow_sand filter water purification system	XXQIITAXX	755	Replicating the microbial community and water quality performance of full-scale slow sand filters in laboratory-scale filters	Sarah Haig	10.1016/j.watres.2014.05.008	ERP020510	16S rRNA	V4	FWD:GTGCCAGCMGCCGCGGTAA; REV:GGACTACHVGGGTWTCTAAT	HiSeq	ANL-Chicago	ANL	2013	150	108483	82352	85959	107657	64208	65287	50383	TRUE	TRUE	FALSE	FALSE	FALSE	718308	biofilm metagenome													2011-05-31T00:00:00Z	GAZ:Scotland	55.906	-3.204	0.1	0
755.SSFA.L1.D20.07.06.11.lane1.NoIndex.L001	CCACCCAGTAAC	GTGCCAGCMGCCGCGGTAA	samples of sand from slow_sand filter water purification system	XXQIITAXX	755	Replicating the microbial community and water quality performance of full-scale slow sand filters in laboratory-scale filters	Sarah Haig	10.1016/j.watres.2014.05.008	ERP020510	16S rRNA	V4	FWD:GTGCCAGCMGCCGCGGTAA; REV:GGACTACHVGGGTWTCTAAT	HiSeq	ANL-Chicago	ANL	2013	150	83800	57412	61423	83052	48286	49843	37143	TRUE	TRUE	FALSE	FALSE	FALSE	718308	biofilm metagenome													2011-06-07T00:00:00Z	GAZ:Scotland	55.906	-3.204	0.2	0
755.SSFA.L1.D20.10.05.11.lane1.NoIndex.L001	GTTCGGTGTCCA	GTGCCAGCMGCCGCGGTAA	samples of sand from slow_sand filter water purification system	XXQIITAXX	755	Replicating the microbial community and water quality performance of full-scale slow sand filters in laboratory-scale filters	Sarah Haig	10.1016/j.watres.2014.05.008	ERP020510	16S rRNA	V4	FWD:GTGCCAGCMGCCGCGGTAA; REV:GGACTACHVGGGTWTCTAAT	HiSeq	ANL-Chicago	ANL	2013	150	111520	67390	72551	109275	59094	59967	42297	TRUE	TRUE	FALSE	FALSE	FALSE	718308	biofilm metagenome													2011-05-11T00:00:00Z	GAZ:Scotland	55.906	-3.204	0.2	0
755.SSFA.L1.D20.14.06.11.lane1.NoIndex.L001	TAGCAGTTGCGT	GTGCCAGCMGCCGCGGTAA	samples of sand from slow_sand filter water purification system	XXQIITAXX	755	Replicating the microbial community and water quality performance of full-scale slow sand filters in laboratory-scale filters	Sarah Haig	10.1016/j.watres.2014.05.008	ERP020510	16S rRNA	V4	FWD:GTGCCAGCMGCCGCGGTAA; REV:GGACTACHVGGGTWTCTAAT	HiSeq	ANL-Chicago	ANL	2013	150	69359	43899	46903	68175	37807	38478	27922	TRUE	TRUE	FALSE	FALSE	FALSE	718308	biofilm metagenome													2011-06-14T00:00:00Z	GAZ:Scotland	55.906	-3.204	0.2	0
755.SSFA.L1.D20.18.10.11.lane1.NoIndex.L001	GCCTGCAGTACT	GTGCCAGCMGCCGCGGTAA	samples of sand from slow_sand filter water purification system	XXQIITAXX	755	Replicating the microbial community and water quality performance of full-scale slow sand filters in laboratory-scale filters	Sarah Haig	10.1016/j.watres.2014.05.008	ERP020510	16S rRNA	V4	FWD:GTGCCAGCMGCCGCGGTAA; REV:GGACTACHVGGGTWTCTAAT	HiSeq	ANL-Chicago	ANL	2013	150	81363	49303	53300	80172	46069	46506	32180	TRUE	TRUE	FALSE	FALSE	FALSE	718308	biofilm metagenome													2011-10-18T00:00:00Z	GAZ:Scotland	55.906	-3.204	0.2	0
755.SSFA.L1.D20.19.04.11.lane1.NoIndex.L001	ATTGTTCCTACC	GTGCCAGCMGCCGCGGTAA	samples of sand from slow_sand filter water purification system	XXQIITAXX	755	Replicating the microbial community and water quality performance of full-scale slow sand filters in laboratory-scale filters	Sarah Haig	10.1016/j.watres.2014.05.008	ERP020510	16S rRNA	V4	FWD:GTGCCAGCMGCCGCGGTAA; REV:GGACTACHVGGGTWTCTAAT	HiSeq	ANL-Chicago	ANL	2013	150	35970	26521	28999	35698	24559	24621	18523	TRUE	TRUE	FALSE	FALSE	FALSE	718308	biofilm metagenome													2011-04-19T00:00:00Z	GAZ:Scotland	55.906	-3.204	0.2	0
755.SSFA.L1.D20.19.07.11.lane1.NoIndex.L001	CTCACGCAATGC	GTGCCAGCMGCCGCGGTAA	samples of sand from slow_sand filter water purification system	XXQIITAXX	755	Replicating the microbial community and water quality performance of full-scale slow sand filters in laboratory-scale filters	Sarah Haig	10.1016/j.watres.2014.05.008	ERP020510	16S rRNA	V4	FWD:GTGCCAGCMGCCGCGGTAA; REV:GGACTACHVGGGTWTCTAAT	HiSeq	ANL-Chicago	ANL	2013	150	64536	39503	42846	63712	37340	37994	26932	TRUE	TRUE	FALSE	FALSE	FALSE	718308	biofilm metagenome													2011-07-19T00:00:00Z	GAZ:Scotland	55.906	-3.204	0.2	0
755.SSFA.L1.D20.21.06.11.lane1.NoIndex.L001	TGGTTATGGCAC	GTGCCAGCMGCCGCGGTAA	samples of sand from slow_sand filter water purification system	XXQIITAXX	755	Replicating the microbial community and water quality performance of full-scale slow sand filters in laboratory-scale filters	Sarah Haig	10.1016/j.watres.2014.05.008	ERP020510	16S rRNA	V4	FWD:GTGCCAGCMGCCGCGGTAA; REV:GGACTACHVGGGTWTCTAAT	HiSeq	ANL-Chicago	ANL	2013	150	73942	46842	50474	72774	39731	40608	29410	TRUE	TRUE	FALSE	FALSE	FALSE	718308	biofilm metagenome													2011-06-21T00:00:00Z	GAZ:Scotland	55.906	-3.204	0.2	0
755.SSFA.L1.D3.07.06.11.lane1.NoIndex.L001	AGCGACGAAGAC	GTGCCAGCMGCCGCGGTAA	samples of sand from slow_sand filter water purification system	XXQIITAXX	755	Replicating the microbial community and water quality performance of full-scale slow sand filters in laboratory-scale filters	Sarah Haig	10.1016/j.watres.2014.05.008	ERP020510	16S rRNA	V4	FWD:GTGCCAGCMGCCGCGGTAA; REV:GGACTACHVGGGTWTCTAAT	HiSeq	ANL-Chicago	ANL	2013	150	87713	59104	63339	86852	50626	52373	39072	TRUE	TRUE	FALSE	FALSE	FALSE	718308	biofilm metagenome													2011-06-07T00:00:00Z	GAZ:Scotland	55.906	-3.204	0.03	0
755.SSFA.L1.D3.10.05.11.lane1.NoIndex.L001	CATCATACGGGT	GTGCCAGCMGCCGCGGTAA	samples of sand from slow_sand filter water purification system	XXQIITAXX	755	Replicating the microbial community and water quality performance of full-scale slow sand filters in laboratory-scale filters	Sarah Haig	10.1016/j.watres.2014.05.008	ERP020510	16S rRNA	V4	FWD:GTGCCAGCMGCCGCGGTAA; REV:GGACTACHVGGGTWTCTAAT	HiSeq	ANL-Chicago	ANL	2013	150	105563	68202	73384	104148	57814	59201	42931	TRUE	TRUE	FALSE	FALSE	FALSE	718308	biofilm metagenome													2011-05-11T00:00:00Z	GAZ:Scotland	55.906	-3.204	0.03	0
755.SSFA.L1.D3.14.06.11.lane1.NoIndex.L001	ATGGCCTGACTA	GTGCCAGCMGCCGCGGTAA	samples of sand from slow_sand filter water purification system	XXQIITAXX	755	Replicating the microbial community and water quality performance of full-scale slow sand filters in laboratory-scale filters	Sarah Haig	10.1016/j.watres.2014.05.008	ERP020510	16S rRNA	V4	FWD:GTGCCAGCMGCCGCGGTAA; REV:GGACTACHVGGGTWTCTAAT	HiSeq	ANL-Chicago	ANL	2013	150	103680	68722	73630	102379	57161	58649	43665	TRUE	TRUE	FALSE	FALSE	FALSE	718308	biofilm metagenome													2011-06-14T00:00:00Z	GAZ:Scotland	55.906	-3.204	0.03	0
755.SSFA.L1.D3.17.05.11.lane1.NoIndex.L001	GGCATGTTATCG	GTGCCAGCMGCCGCGGTAA	samples of sand from slow_sand filter water purification system	XXQIITAXX	755	Replicating the microbial community and water quality performance of full-scale slow sand filters in laboratory-scale filters	Sarah Haig	10.1016/j.watres.2014.05.008	ERP020510	16S rRNA	V4	FWD:GTGCCAGCMGCCGCGGTAA; REV:GGACTACHVGGGTWTCTAAT	HiSeq	ANL-Chicago	ANL	2013	150	86106	67460	69471	85332	51498	51701	39761	TRUE	TRUE	FALSE	FALSE	FALSE	718308	biofilm metagenome													2011-05-17T00:00:00Z	GAZ:Scotland	55.906	-3.204	0.03	0
755.SSFA.L1.D3.18.10.11.lane1.NoIndex.L001	AACCCAGATGAT	GTGCCAGCMGCCGCGGTAA	samples of sand from slow_sand filter water purification system	XXQIITAXX	755	Replicating the microbial community and water quality performance of full-scale slow sand filters in laboratory-scale filters	Sarah Haig	10.1016/j.watres.2014.05.008	ERP020510	16S rRNA	V4	FWD:GTGCCAGCMGCCGCGGTAA; REV:GGACTACHVGGGTWTCTAAT	HiSeq	ANL-Chicago	ANL	2013	150	81345	47949	51930	79956	46539	46651	32844	TRUE	TRUE	FALSE	FALSE	FALSE	718308	biofilm metagenome													2011-10-18T00:00:00Z	GAZ:Scotland	55.906	-3.204	0.03	0
755.SSFA.L1.D3.19.07.11.lane1.NoIndex.L001	TCACCCAAGGTA	GTGCCAGCMGCCGCGGTAA	samples of sand from slow_sand filter water purification system	XXQIITAXX	755	Replicating the microbial community and water quality performance of full-scale slow sand filters in laboratory-scale filters	Sarah Haig	10.1016/j.watres.2014.05.008	ERP020510	16S rRNA	V4	FWD:GTGCCAGCMGCCGCGGTAA; REV:GGACTACHVGGGTWTCTAAT	HiSeq	ANL-Chicago	ANL	2013	150	97965	63489	68466	96719	55361	56764	41710	TRUE	TRUE	FALSE	FALSE	FALSE	718308	biofilm metagenome													2011-07-19T00:00:00Z	GAZ:Scotland	55.906	-3.204	0.03	0
755.SSFA.L1.D30.07.06.11.lane1.NoIndex.L001	CCTGCTTCCTTC	GTGCCAGCMGCCGCGGTAA	samples of sand from slow_sand filter water purification system	XXQIITAXX	755	Replicating the microbial community and water quality performance of full-scale slow sand filters in laboratory-scale filters	Sarah Haig	10.1016/j.watres.2014.05.008	ERP020510	16S rRNA	V4	FWD:GTGCCAGCMGCCGCGGTAA; REV:GGACTACHVGGGTWTCTAAT	HiSeq	ANL-Chicago	ANL	2013	150	90968	61935	66331	90098	52751	54409	40637	TRUE	TRUE	FALSE	FALSE	FALSE	718308	biofilm metagenome													2011-06-07T00:00:00Z	GAZ:Scotland	55.906	-3.204	0.3	0
755.SSFA.L1.D30.10.05.11.lane1.NoIndex.L001	GTAATGCGTAAC	GTGCCAGCMGCCGCGGTAA	samples of sand from slow_sand filter water purification system	XXQIITAXX	755	Replicating the microbial community and water quality performance of full-scale slow sand filters in laboratory-scale filters	Sarah Haig	10.1016/j.watres.2014.05.008	ERP020510	16S rRNA	V4	FWD:GTGCCAGCMGCCGCGGTAA; REV:GGACTACHVGGGTWTCTAAT	HiSeq	ANL-Chicago	ANL	2013	150	122779	79408	85674	120969	66249	67770	48339	TRUE	TRUE	FALSE	FALSE	FALSE	718308	biofilm metagenome													2011-05-11T00:00:00Z	GAZ:Scotland	55.906	-3.204	0.3	0
755.SSFA.L1.D30.19.04.11.lane1.NoIndex.L001	CTATCATCCTCA	GTGCCAGCMGCCGCGGTAA	samples of sand from slow_sand filter water purification system	XXQIITAXX	755	Replicating the microbial community and water quality performance of full-scale slow sand filters in laboratory-scale filters	Sarah Haig	10.1016/j.watres.2014.05.008	ERP020510	16S rRNA	V4	FWD:GTGCCAGCMGCCGCGGTAA; REV:GGACTACHVGGGTWTCTAAT	HiSeq	ANL-Chicago	ANL	2013	150	67373	45603	48909	66491	38635	39297	28620	TRUE	TRUE	FALSE	FALSE	FALSE	718308	biofilm metagenome													2011-04-19T00:00:00Z	GAZ:Scotland	55.906	-3.204	0.3	0
755.SSFA.L1.D30.19.07.11.lane1.NoIndex.L001	GGCATTAGTTGA	GTGCCAGCMGCCGCGGTAA	samples of sand from slow_sand filter water purification system	XXQIITAXX	755	Replicating the microbial community and water quality performance of full-scale slow sand filters in laboratory-scale filters	Sarah Haig	10.1016/j.watres.2014.05.008	ERP020510	16S rRNA	V4	FWD:GTGCCAGCMGCCGCGGTAA; REV:GGACTACHVGGGTWTCTAAT	HiSeq	ANL-Chicago	ANL	2013	150	96436	59671	64704	95089	54062	55432	39829	TRUE	TRUE	FALSE	FALSE	FALSE	718308	biofilm metagenome													2011-07-19T00:00:00Z	GAZ:Scotland	55.906	-3.204	0.3	0
755.SSFA.L1.D40.03.05.11.lane1.NoIndex.L001	CGCTCACAGAAT	GTGCCAGCMGCCGCGGTAA	samples of sand from slow_sand filter water purification system	XXQIITAXX	755	Replicating the microbial community and water quality performance of full-scale slow sand filters in laboratory-scale filters	Sarah Haig	10.1016/j.watres.2014.05.008	ERP020510	16S rRNA	V4	FWD:GTGCCAGCMGCCGCGGTAA; REV:GGACTACHVGGGTWTCTAAT	HiSeq	ANL-Chicago	ANL	2013	150	68146	44243	47355	67300	38569	39288	28296	TRUE	TRUE	FALSE	FALSE	FALSE	718308	biofilm metagenome													2011-05-03T00:00:00Z	GAZ:Scotland	55.906	-3.204	0.4	0
755.SSFA.L1.D40.10.05.11.lane1.NoIndex.L001	CCTGTCCTATCT	GTGCCAGCMGCCGCGGTAA	samples of sand from slow_sand filter water purification system	XXQIITAXX	755	Replicating the microbial community and water quality performance of full-scale slow sand filters in laboratory-scale filters	Sarah Haig	10.1016/j.watres.2014.05.008	ERP020510	16S rRNA	V4	FWD:GTGCCAGCMGCCGCGGTAA; REV:GGACTACHVGGGTWTCTAAT	HiSeq	ANL-Chicago	ANL	2013	150	114365	74820	80368	112726	62053	63203	45947	TRUE	TRUE	FALSE	FALSE	FALSE	718308	biofilm metagenome													2011-05-11T00:00:00Z	GAZ:Scotland	55.906	-3.204	0.4	0
755.SSFA.L1.D40.14.06.11.lane1.NoIndex.L001	GATGACCCAAAT	GTGCCAGCMGCCGCGGTAA	samples of sand from slow_sand filter water purification system	XXQIITAXX	755	Replicating the microbial community and water quality performance of full-scale slow sand filters in laboratory-scale filters	Sarah Haig	10.1016/j.watres.2014.05.008	ERP020510	16S rRNA	V4	FWD:GTGCCAGCMGCCGCGGTAA; REV:GGACTACHVGGGTWTCTAAT	HiSeq	ANL-Chicago	ANL	2013	150	136797	88079	94170	134606	73422	74972	55219	TRUE	TRUE	FALSE	FALSE	FALSE	718308	biofilm metagenome													2011-06-14T00:00:00Z	GAZ:Scotland	55.906	-3.204	0.4	0
755.SSFA.L1.D40.17.05.11.lane1.NoIndex.L001	CATGCCAACATG	GTGCCAGCMGCCGCGGTAA	samples of sand from slow_sand filter water purification system	XXQIITAXX	755	Replicating the microbial community and water quality performance of full-scale slow sand filters in laboratory-scale filters	Sarah Haig	10.1016/j.watres.2014.05.008	ERP020510	16S rRNA	V4	FWD:GTGCCAGCMGCCGCGGTAA; REV:GGACTACHVGGGTWTCTAAT	HiSeq	ANL-Chicago	ANL	2013	150	88865	67393	70295	87906	51415	51898	39313	TRUE	TRUE	FALSE	FALSE	FALSE	718308	biofilm metagenome													2011-05-17T00:00:00Z	GAZ:Scotland	55.906	-3.204	0.4	0
755.SSFA.L1.D40.17.05.11.lane1.NoIndex.L001	CATGCCAACATG	GTGCCAGCMGCCGCGGTAA	samples of sand from slow_sand filter water purification system	XXQIITAXX	755	Replicating the microbial community and water quality performance of full-scale slow sand filters in laboratory-scale filters	Sarah Haig	10.1016/j.watres.2014.05.008	ERP020510	16S rRNA	V4	FWD:GTGCCAGCMGCCGCGGTAA; REV:GGACTACHVGGGTWTCTAAT	HiSeq	ANL-Chicago	ANL	2013	150	88865	67393	70295	87906	51415	51898	39313	TRUE	TRUE	FALSE	FALSE	FALSE	718308	biofilm metagenome													2011-05-17T00:00:00Z	GAZ:Scotland	55.906	-3.204	0.4	0
755.SSFA.L1.D40.19.04.11.lane1.NoIndex.L001	TTCCTAGGCCAG	GTGCCAGCMGCCGCGGTAA	samples of sand from slow_sand filter water purification system	XXQIITAXX	755	Replicating the microbial community and water quality performance of full-scale slow sand filters in laboratory-scale filters	Sarah Haig	10.1016/j.watres.2014.05.008	ERP020510	16S rRNA	V4	FWD:GTGCCAGCMGCCGCGGTAA; REV:GGACTACHVGGGTWTCTAAT	HiSeq	ANL-Chicago	ANL	2013	150	88897	57426	61407	87447	48469	49342	35369	TRUE	TRUE	FALSE	FALSE	FALSE	718308	biofilm metagenome													2011-04-19T00:00:00Z	GAZ:Scotland	55.906	-3.204	0.4	0
755.SSFA.L1.D40.19.07.11.lane1.NoIndex.L001	GCTCCTTAGAAG	GTGCCAGCMGCCGCGGTAA	samples of sand from slow_sand filter water purification system	XXQIITAXX	755	Replicating the microbial community and water quality performance of full-scale slow sand filters in laboratory-scale filters	Sarah Haig	10.1016/j.watres.2014.05.008	ERP020510	16S rRNA	V4	FWD:GTGCCAGCMGCCGCGGTAA; REV:GGACTACHVGGGTWTCTAAT	HiSeq	ANL-Chicago	ANL	2013	150	104074	64481	69896	102730	61057	62668	45296	TRUE	TRUE	FALSE	FALSE	FALSE	718308	biofilm metagenome													2011-07-19T00:00:00Z	GAZ:Scotland	55.906	-3.204	0.4	0
755.SSFA.L1.D5.10.05.11.lane1.NoIndex.L001	CGCATTTGGATG	GTGCCAGCMGCCGCGGTAA	samples of sand from slow_sand filter water purification system	XXQIITAXX	755	Replicating the microbial community and water quality performance of full-scale slow sand filters in laboratory-scale filters	Sarah Haig	10.1016/j.watres.2014.05.008	ERP020510	16S rRNA	V4	FWD:GTGCCAGCMGCCGCGGTAA; REV:GGACTACHVGGGTWTCTAAT	HiSeq	ANL-Chicago	ANL	2013	150	112267	71306	76693	110577	61549	62937	46195	TRUE	TRUE	FALSE	FALSE	FALSE	718308	biofilm metagenome													2011-05-11T00:00:00Z	GAZ:Scotland	55.906	-3.204	0.05	0
755.SSFA.L1.D5.14.06.11.lane1.NoIndex.L001	AGCAGGCACGAA	GTGCCAGCMGCCGCGGTAA	samples of sand from slow_sand filter water purification system	XXQIITAXX	755	Replicating the microbial community and water quality performance of full-scale slow sand filters in laboratory-scale filters	Sarah Haig	10.1016/j.watres.2014.05.008	ERP020510	16S rRNA	V4	FWD:GTGCCAGCMGCCGCGGTAA; REV:GGACTACHVGGGTWTCTAAT	HiSeq	ANL-Chicago	ANL	2013	150	92227	59779	64012	90913	50683	51755	37572	TRUE	TRUE	FALSE	FALSE	FALSE	718308	biofilm metagenome													2011-06-14T00:00:00Z	GAZ:Scotland	55.906	-3.204	0.05	0
755.SSFA.L1.D5.17.05.11.lane1.NoIndex.L001	TGTACATCGCCG	GTGCCAGCMGCCGCGGTAA	samples of sand from slow_sand filter water purification system	XXQIITAXX	755	Replicating the microbial community and water quality performance of full-scale slow sand filters in laboratory-scale filters	Sarah Haig	10.1016/j.watres.2014.05.008	ERP020510	16S rRNA	V4	FWD:GTGCCAGCMGCCGCGGTAA; REV:GGACTACHVGGGTWTCTAAT	HiSeq	ANL-Chicago	ANL	2013	150	68291	54122	55790	67791	41631	41729	31801	TRUE	TRUE	FALSE	FALSE	FALSE	718308	biofilm metagenome													2011-05-17T00:00:00Z	GAZ:Scotland	55.906	-3.204	0.05	0
755.SSFA.L1.D5.19.04.11.lane1.NoIndex.L001	CGTAGGTAGAGG	GTGCCAGCMGCCGCGGTAA	samples of sand from slow_sand filter water purification system	XXQIITAXX	755	Replicating the microbial community and water quality performance of full-scale slow sand filters in laboratory-scale filters	Sarah Haig	10.1016/j.watres.2014.05.008	ERP020510	16S rRNA	V4	FWD:GTGCCAGCMGCCGCGGTAA; REV:GGACTACHVGGGTWTCTAAT	HiSeq	ANL-Chicago	ANL	2013	150	48394	35011	37192	47809	29958	30183	22292	TRUE	TRUE	FALSE	FALSE	FALSE	718308	biofilm metagenome													2011-04-19T00:00:00Z	GAZ:Scotland	55.906	-3.204	0.05	0
755.SSFA.L1.D5.21.06.11.lane1.NoIndex.L001	TGACCGGCTGTT	GTGCCAGCMGCCGCGGTAA	samples of sand from slow_sand filter water purification system	XXQIITAXX	755	Replicating the microbial community and water quality performance of full-scale slow sand filters in laboratory-scale filters	Sarah Haig	10.1016/j.watres.2014.05.008	ERP020510	16S rRNA	V4	FWD:GTGCCAGCMGCCGCGGTAA; REV:GGACTACHVGGGTWTCTAAT	HiSeq	ANL-Chicago	ANL	2013	150	53389	34574	37084	52692	29627	30233	21822	TRUE	TRUE	FALSE	FALSE	FALSE	718308	biofilm metagenome													2011-06-21T00:00:00Z	GAZ:Scotland	55.906	-3.204	0.05	0
755.SSFA.L1.D50.07.06.11.lane1.NoIndex.L001	CATCAAGCATAG	GTGCCAGCMGCCGCGGTAA	samples of sand from slow_sand filter water purification system	XXQIITAXX	755	Replicating the microbial community and water quality performance of full-scale slow sand filters in laboratory-scale filters	Sarah Haig	10.1016/j.watres.2014.05.008	ERP020510	16S rRNA	V4	FWD:GTGCCAGCMGCCGCGGTAA; REV:GGACTACHVGGGTWTCTAAT	HiSeq	ANL-Chicago	ANL	2013	150	84487	57117	61038	83577	48887	50302	37704	TRUE	TRUE	FALSE	FALSE	FALSE	718308	biofilm metagenome													2011-06-07T00:00:00Z	GAZ:Scotland	55.906	-3.204	0.5	0
755.SSFA.L1.D50.10.05.11.lane1.NoIndex.L001	ACCGTGCTCACA	GTGCCAGCMGCCGCGGTAA	samples of sand from slow_sand filter water purification system	XXQIITAXX	755	Replicating the microbial community and water quality performance of full-scale slow sand filters in laboratory-scale filters	Sarah Haig	10.1016/j.watres.2014.05.008	ERP020510	16S rRNA	V4	FWD:GTGCCAGCMGCCGCGGTAA; REV:GGACTACHVGGGTWTCTAAT	HiSeq	ANL-Chicago	ANL	2013	150	124899	81632	87896	123184	67178	68766	49685	TRUE	TRUE	FALSE	FALSE	FALSE	718308	biofilm metagenome													2011-05-11T00:00:00Z	GAZ:Scotland	55.906	-3.204	0.5	0
755.SSFA.L1.D50.14.06.11.lane1.NoIndex.L001	GATATACCAGTG	GTGCCAGCMGCCGCGGTAA	samples of sand from slow_sand filter water purification system	XXQIITAXX	755	Replicating the microbial community and water quality performance of full-scale slow sand filters in laboratory-scale filters	Sarah Haig	10.1016/j.watres.2014.05.008	ERP020510	16S rRNA	V4	FWD:GTGCCAGCMGCCGCGGTAA; REV:GGACTACHVGGGTWTCTAAT	HiSeq	ANL-Chicago	ANL	2013	150	75338	48031	51571	74252	41232	42121	30900	TRUE	TRUE	FALSE	FALSE	FALSE	718308	biofilm metagenome													2011-06-14T00:00:00Z	GAZ:Scotland	55.906	-3.204	0.5	0
755.SSFA.L1.D50.18.10.11.lane1.NoIndex.L001	GGTCGTGTCTTG	GTGCCAGCMGCCGCGGTAA	samples of sand from slow_sand filter water purification system	XXQIITAXX	755	Replicating the microbial community and water quality performance of full-scale slow sand filters in laboratory-scale filters	Sarah Haig	10.1016/j.watres.2014.05.008	ERP020510	16S rRNA	V4	FWD:GTGCCAGCMGCCGCGGTAA; REV:GGACTACHVGGGTWTCTAAT	HiSeq	ANL-Chicago	ANL	2013	150	63506	44439	47154	62201	33434	34225	26462	TRUE	TRUE	FALSE	FALSE	FALSE	718308	biofilm metagenome													2011-10-18T00:00:00Z	GAZ:Scotland	55.906	-3.204	0.5	0
755.SSFA.L1.D50.19.04.11.lane1.NoIndex.L001	GCCGTCTCGTAA	GTGCCAGCMGCCGCGGTAA	samples of sand from slow_sand filter water purification system	XXQIITAXX	755	Replicating the microbial community and water quality performance of full-scale slow sand filters in laboratory-scale filters	Sarah Haig	10.1016/j.watres.2014.05.008	ERP020510	16S rRNA	V4	FWD:GTGCCAGCMGCCGCGGTAA; REV:GGACTACHVGGGTWTCTAAT	HiSeq	ANL-Chicago	ANL	2013	150	61577	41011	43784	60862	34800	35498	22739	TRUE	TRUE	FALSE	FALSE	FALSE	718308	biofilm metagenome													2011-04-19T00:00:00Z	GAZ:Scotland	55.906	-3.204	0.5	0
755.SSFA.L1.D50.19.07.11.lane1.NoIndex.L001	GACCCTAGACCT	GTGCCAGCMGCCGCGGTAA	samples of sand from slow_sand filter water purification system	XXQIITAXX	755	Replicating the microbial community and water quality performance of full-scale slow sand filters in laboratory-scale filters	Sarah Haig	10.1016/j.watres.2014.05.008	ERP020510	16S rRNA	V4	FWD:GTGCCAGCMGCCGCGGTAA; REV:GGACTACHVGGGTWTCTAAT	HiSeq	ANL-Chicago	ANL	2013	150	90189	54685	59756	88655	51086	52705	38247	TRUE	TRUE	FALSE	FALSE	FALSE	718308	biofilm metagenome													2011-07-19T00:00:00Z	GAZ:Scotland	55.906	-3.204	0.5	0
755.SSFA.L1.D50.21.06.11.lane1.NoIndex.L001	GTTTGGCCACAC	GTGCCAGCMGCCGCGGTAA	samples of sand from slow_sand filter water purification system	XXQIITAXX	755	Replicating the microbial community and water quality performance of full-scale slow sand filters in laboratory-scale filters	Sarah Haig	10.1016/j.watres.2014.05.008	ERP020510	16S rRNA	V4	FWD:GTGCCAGCMGCCGCGGTAA; REV:GGACTACHVGGGTWTCTAAT	HiSeq	ANL-Chicago	ANL	2013	150	73988	46945	50508	72758	39274	40093	28824	TRUE	TRUE	FALSE	FALSE	FALSE	718308	biofilm metagenome													2011-06-21T00:00:00Z	GAZ:Scotland	55.906	-3.204	0.5	0
755.SSFA.L2.D1.06.07.11.lane1.NoIndex.L001	CTTTCGTTCAAC	GTGCCAGCMGCCGCGGTAA	samples of sand from slow_sand filter water purification system	XXQIITAXX	755	Replicating the microbial community and water quality performance of full-scale slow sand filters in laboratory-scale filters	Sarah Haig	10.1016/j.watres.2014.05.008	ERP020510	16S rRNA	V4	FWD:GTGCCAGCMGCCGCGGTAA; REV:GGACTACHVGGGTWTCTAAT	HiSeq	ANL-Chicago	ANL	2013	150	99522	58661	64152	98008	55389	56961	41326	TRUE	TRUE	FALSE	FALSE	FALSE	718308	biofilm metagenome													2011-07-06T00:00:00Z	GAZ:Scotland	55.906	-3.204	0.01	0
755.SSFA.L2.D1.10.05.11.lane1.NoIndex.L001	ACGTGTAGGCTT	GTGCCAGCMGCCGCGGTAA	samples of sand from slow_sand filter water purification system	XXQIITAXX	755	Replicating the microbial community and water quality performance of full-scale slow sand filters in laboratory-scale filters	Sarah Haig	10.1016/j.watres.2014.05.008	ERP020510	16S rRNA	V4	FWD:GTGCCAGCMGCCGCGGTAA; REV:GGACTACHVGGGTWTCTAAT	HiSeq	ANL-Chicago	ANL	2013	150	101115	61355	66196	99610	57087	58340	41887	TRUE	TRUE	FALSE	FALSE	FALSE	718308	biofilm metagenome													2011-05-11T00:00:00Z	GAZ:Scotland	55.906	-3.204	0.01	0
755.SSFA.L2.D1.12.07.11.lane1.NoIndex.L001	ACTACCTCTTCA	GTGCCAGCMGCCGCGGTAA	samples of sand from slow_sand filter water purification system	XXQIITAXX	755	Replicating the microbial community and water quality performance of full-scale slow sand filters in laboratory-scale filters	Sarah Haig	10.1016/j.watres.2014.05.008	ERP020510	16S rRNA	V4	FWD:GTGCCAGCMGCCGCGGTAA; REV:GGACTACHVGGGTWTCTAAT	HiSeq	ANL-Chicago	ANL	2013	150	76841	53189	56868	75749	42802	43995	32817	TRUE	TRUE	FALSE	FALSE	FALSE	718308	biofilm metagenome													2011-07-12T00:00:00Z	GAZ:Scotland	55.906	-3.204	0.01	0
755.SSFA.L2.D1.14.06.11.lane1.NoIndex.L001	CCTCGATGCAGT	GTGCCAGCMGCCGCGGTAA	samples of sand from slow_sand filter water purification system	XXQIITAXX	755	Replicating the microbial community and water quality performance of full-scale slow sand filters in laboratory-scale filters	Sarah Haig	10.1016/j.watres.2014.05.008	ERP020510	16S rRNA	V4	FWD:GTGCCAGCMGCCGCGGTAA; REV:GGACTACHVGGGTWTCTAAT	HiSeq	ANL-Chicago	ANL	2013	150	97375	60813	66039	96132	54845	55882	40606	TRUE	TRUE	FALSE	FALSE	FALSE	718308	biofilm metagenome													2011-06-14T00:00:00Z	GAZ:Scotland	55.906	-3.204	0.01	0
755.SSFA.L2.D1.19.04.11.lane1.NoIndex.L001	GCATCAGAGTTA	GTGCCAGCMGCCGCGGTAA	samples of sand from slow_sand filter water purification system	XXQIITAXX	755	Replicating the microbial community and water quality performance of full-scale slow sand filters in laboratory-scale filters	Sarah Haig	10.1016/j.watres.2014.05.008	ERP020510	16S rRNA	V4	FWD:GTGCCAGCMGCCGCGGTAA; REV:GGACTACHVGGGTWTCTAAT	HiSeq	ANL-Chicago	ANL	2013	150	113120	74399	79701	111060	60441	62712	47635	TRUE	TRUE	FALSE	FALSE	FALSE	718308	biofilm metagenome													2011-04-19T00:00:00Z	GAZ:Scotland	55.906	-3.204	0.01	0
755.SSFA.L2.D1.19.07.11.lane1.NoIndex.L001	AGTCTGTCTGCG	GTGCCAGCMGCCGCGGTAA	samples of sand from slow_sand filter water purification system	XXQIITAXX	755	Replicating the microbial community and water quality performance of full-scale slow sand filters in laboratory-scale filters	Sarah Haig	10.1016/j.watres.2014.05.008	ERP020510	16S rRNA	V4	FWD:GTGCCAGCMGCCGCGGTAA; REV:GGACTACHVGGGTWTCTAAT	HiSeq	ANL-Chicago	ANL	2013	150	74347	47100	50755	73368	41589	42568	30384	TRUE	TRUE	FALSE	FALSE	FALSE	718308	biofilm metagenome													2011-07-19T00:00:00Z	GAZ:Scotland	55.906	-3.204	0.01	0
755.SSFA.L2.D1.20.09.11.lane1.NoIndex.L001	GGAAATCCCATC	GTGCCAGCMGCCGCGGTAA	samples of sand from slow_sand filter water purification system	XXQIITAXX	755	Replicating the microbial community and water quality performance of full-scale slow sand filters in laboratory-scale filters	Sarah Haig	10.1016/j.watres.2014.05.008	ERP020510	16S rRNA	V4	FWD:GTGCCAGCMGCCGCGGTAA; REV:GGACTACHVGGGTWTCTAAT	HiSeq	ANL-Chicago	ANL	2013	150	85366	57742	61183	82676	41906	43217	33204	TRUE	TRUE	FALSE	FALSE	FALSE	718308	biofilm metagenome													2011-09-20T00:00:00Z	GAZ:Scotland	55.906	-3.204	0.01	0
755.SSFA.L2.D1.21.06.11.lane1.NoIndex.L001	AGGCTAGCAGAG	GTGCCAGCMGCCGCGGTAA	samples of sand from slow_sand filter water purification system	XXQIITAXX	755	Replicating the microbial community and water quality performance of full-scale slow sand filters in laboratory-scale filters	Sarah Haig	10.1016/j.watres.2014.05.008	ERP020510	16S rRNA	V4	FWD:GTGCCAGCMGCCGCGGTAA; REV:GGACTACHVGGGTWTCTAAT	HiSeq	ANL-Chicago	ANL	2013	150	35235	22333	24104	34814	20470	20760	15249	TRUE	TRUE	TRUE	TRUE	FALSE	718308	biofilm metagenome													2011-06-21T00:00:00Z	GAZ:Scotland	55.906	-3.204	0.01	0
755.SSFA.L2.D1.24.08.11.lane1.NoIndex.L001	TTACTGTGGCCG	GTGCCAGCMGCCGCGGTAA	samples of sand from slow_sand filter water purification system	XXQIITAXX	755	Replicating the microbial community and water quality performance of full-scale slow sand filters in laboratory-scale filters	Sarah Haig	10.1016/j.watres.2014.05.008	ERP020510	16S rRNA	V4	FWD:GTGCCAGCMGCCGCGGTAA; REV:GGACTACHVGGGTWTCTAAT	HiSeq	ANL-Chicago	ANL	2013	150	85024	52585	56813	83804	47564	48744	35436	TRUE	TRUE	FALSE	FALSE	FALSE	718308	biofilm metagenome													2011-08-24T00:00:00Z	GAZ:Scotland	55.906	-3.204	0.01	0
755.SSFA.L2.D1.26.07.11.lane1.NoIndex.L001	TGAACTAGCGTC	GTGCCAGCMGCCGCGGTAA	samples of sand from slow_sand filter water purification system	XXQIITAXX	755	Replicating the microbial community and water quality performance of full-scale slow sand filters in laboratory-scale filters	Sarah Haig	10.1016/j.watres.2014.05.008	ERP020510	16S rRNA	V4	FWD:GTGCCAGCMGCCGCGGTAA; REV:GGACTACHVGGGTWTCTAAT	HiSeq	ANL-Chicago	ANL	2013	150	74609	56871	58922	73861	42708	43159	33519	TRUE	TRUE	FALSE	FALSE	FALSE	718308	biofilm metagenome													2011-07-26T00:00:00Z	GAZ:Scotland	55.906	-3.204	0.01	0
755.SSFA.L2.D1.28.06.11.lane1.NoIndex.L001	AATGCAATGCGT	GTGCCAGCMGCCGCGGTAA	samples of sand from slow_sand filter water purification system	XXQIITAXX	755	Replicating the microbial community and water quality performance of full-scale slow sand filters in laboratory-scale filters	Sarah Haig	10.1016/j.watres.2014.05.008	ERP020510	16S rRNA	V4	FWD:GTGCCAGCMGCCGCGGTAA; REV:GGACTACHVGGGTWTCTAAT	HiSeq	ANL-Chicago	ANL	2013	150	57989	45796	47273	57575	35742	36000	27695	TRUE	TRUE	FALSE	FALSE	FALSE	718308	biofilm metagenome													2011-06-28T00:00:00Z	GAZ:Scotland	55.906	-3.204	0.01	0
755.SSFA.L2.D10.03.05.11.lane1.NoIndex.L001	CTTAGGCATGTG	GTGCCAGCMGCCGCGGTAA	samples of sand from slow_sand filter water purification system	XXQIITAXX	755	Replicating the microbial community and water quality performance of full-scale slow sand filters in laboratory-scale filters	Sarah Haig	10.1016/j.watres.2014.05.008	ERP020510	16S rRNA	V4	FWD:GTGCCAGCMGCCGCGGTAA; REV:GGACTACHVGGGTWTCTAAT	HiSeq	ANL-Chicago	ANL	2013	150	78111	48521	52160	76884	43832	44534	31349	TRUE	TRUE	FALSE	FALSE	FALSE	718308	biofilm metagenome													2011-05-03T00:00:00Z	GAZ:Scotland	55.906	-3.204	0.1	0
755.SSFA.L2.D10.10.05.11.lane1.NoIndex.L001	CGACTCTAAACG	GTGCCAGCMGCCGCGGTAA	samples of sand from slow_sand filter water purification system	XXQIITAXX	755	Replicating the microbial community and water quality performance of full-scale slow sand filters in laboratory-scale filters	Sarah Haig	10.1016/j.watres.2014.05.008	ERP020510	16S rRNA	V4	FWD:GTGCCAGCMGCCGCGGTAA; REV:GGACTACHVGGGTWTCTAAT	HiSeq	ANL-Chicago	ANL	2013	150	91363	55321	59516	90004	51743	52479	37329	TRUE	TRUE	FALSE	FALSE	FALSE	718308	biofilm metagenome													2011-05-11T00:00:00Z	GAZ:Scotland	55.906	-3.204	0.1	0
755.SSFA.L2.D10.14.06.11.lane1.NoIndex.L001	GTTTCACGCGAA	GTGCCAGCMGCCGCGGTAA	samples of sand from slow_sand filter water purification system	XXQIITAXX	755	Replicating the microbial community and water quality performance of full-scale slow sand filters in laboratory-scale filters	Sarah Haig	10.1016/j.watres.2014.05.008	ERP020510	16S rRNA	V4	FWD:GTGCCAGCMGCCGCGGTAA; REV:GGACTACHVGGGTWTCTAAT	HiSeq	ANL-Chicago	ANL	2013	150	80880	50130	54284	79790	45787	46321	33340	TRUE	TRUE	FALSE	FALSE	FALSE	718308	biofilm metagenome													2011-06-14T00:00:00Z	GAZ:Scotland	55.906	-3.204	0.1	0
755.SSFA.L2.D10.19.04.11.lane1.NoIndex.L001	ATCCCTACGGAA	GTGCCAGCMGCCGCGGTAA	samples of sand from slow_sand filter water purification system	XXQIITAXX	755	Replicating the microbial community and water quality performance of full-scale slow sand filters in laboratory-scale filters	Sarah Haig	10.1016/j.watres.2014.05.008	ERP020510	16S rRNA	V4	FWD:GTGCCAGCMGCCGCGGTAA; REV:GGACTACHVGGGTWTCTAAT	HiSeq	ANL-Chicago	ANL	2013	150	49449	32551	35095	48820	28402	29209	21654	TRUE	TRUE	FALSE	FALSE	FALSE	718308	biofilm metagenome													2011-04-19T00:00:00Z	GAZ:Scotland	55.906	-3.204	0.1	0
755.SSFA.L2.D10.24.08.11.lane1.NoIndex.L001	GAGTTAGCATCA	GTGCCAGCMGCCGCGGTAA	samples of sand from slow_sand filter water purification system	XXQIITAXX	755	Replicating the microbial community and water quality performance of full-scale slow sand filters in laboratory-scale filters	Sarah Haig	10.1016/j.watres.2014.05.008	ERP020510	16S rRNA	V4	FWD:GTGCCAGCMGCCGCGGTAA; REV:GGACTACHVGGGTWTCTAAT	HiSeq	ANL-Chicago	ANL	2013	150	99162	60411	65403	97664	54022	55435	40970	TRUE	TRUE	FALSE	FALSE	FALSE	718308	biofilm metagenome													2011-08-24T00:00:00Z	GAZ:Scotland	55.906	-3.204	0.1	0
755.SSFA.L2.D10.26.07.11.lane1.NoIndex.L001	ATGCCTCGTAAG	GTGCCAGCMGCCGCGGTAA	samples of sand from slow_sand filter water purification system	XXQIITAXX	755	Replicating the microbial community and water quality performance of full-scale slow sand filters in laboratory-scale filters	Sarah Haig	10.1016/j.watres.2014.05.008	ERP020510	16S rRNA	V4	FWD:GTGCCAGCMGCCGCGGTAA; REV:GGACTACHVGGGTWTCTAAT	HiSeq	ANL-Chicago	ANL	2013	150	69680	54300	55934	69082	42528	42962	33394	TRUE	TRUE	FALSE	FALSE	FALSE	718308	biofilm metagenome													2011-07-26T00:00:00Z	GAZ:Scotland	55.906	-3.204	0.1	0
755.SSFA.L2.D20.03.05.11.lane1.NoIndex.L001	GAGCGTATCCAT	GTGCCAGCMGCCGCGGTAA	samples of sand from slow_sand filter water purification system	XXQIITAXX	755	Replicating the microbial community and water quality performance of full-scale slow sand filters in laboratory-scale filters	Sarah Haig	10.1016/j.watres.2014.05.008	ERP020510	16S rRNA	V4	FWD:GTGCCAGCMGCCGCGGTAA; REV:GGACTACHVGGGTWTCTAAT	HiSeq	ANL-Chicago	ANL	2013	150	99468	61292	65769	98073	56659	57914	41566	TRUE	TRUE	FALSE	FALSE	FALSE	718308	biofilm metagenome													2011-05-03T00:00:00Z	GAZ:Scotland	55.906	-3.204	0.2	0
755.SSFA.L2.D20.14.06.11.lane1.NoIndex.L001	CACGCTATTGGA	GTGCCAGCMGCCGCGGTAA	samples of sand from slow_sand filter water purification system	XXQIITAXX	755	Replicating the microbial community and water quality performance of full-scale slow sand filters in laboratory-scale filters	Sarah Haig	10.1016/j.watres.2014.05.008	ERP020510	16S rRNA	V4	FWD:GTGCCAGCMGCCGCGGTAA; REV:GGACTACHVGGGTWTCTAAT	HiSeq	ANL-Chicago	ANL	2013	150	127518	77861	84016	125686	71161	72467	51812	TRUE	TRUE	FALSE	FALSE	FALSE	718308	biofilm metagenome													2011-06-14T00:00:00Z	GAZ:Scotland	55.906	-3.204	0.2	0
755.SSFA.L2.D20.19.04.11.lane1.NoIndex.L001	GCCGTAAACTTG	GTGCCAGCMGCCGCGGTAA	samples of sand from slow_sand filter water purification system	XXQIITAXX	755	Replicating the microbial community and water quality performance of full-scale slow sand filters in laboratory-scale filters	Sarah Haig	10.1016/j.watres.2014.05.008	ERP020510	16S rRNA	V4	FWD:GTGCCAGCMGCCGCGGTAA; REV:GGACTACHVGGGTWTCTAAT	HiSeq	ANL-Chicago	ANL	2013	150	73361	46721	50424	72239	40391	41455	29035	TRUE	TRUE	FALSE	FALSE	FALSE	718308	biofilm metagenome													2011-04-19T00:00:00Z	GAZ:Scotland	55.906	-3.204	0.2	0
755.SSFA.L2.D20.19.07.11.lane1.NoIndex.L001	GTCCCGTGAAAT	GTGCCAGCMGCCGCGGTAA	samples of sand from slow_sand filter water purification system	XXQIITAXX	755	Replicating the microbial community and water quality performance of full-scale slow sand filters in laboratory-scale filters	Sarah Haig	10.1016/j.watres.2014.05.008	ERP020510	16S rRNA	V4	FWD:GTGCCAGCMGCCGCGGTAA; REV:GGACTACHVGGGTWTCTAAT	HiSeq	ANL-Chicago	ANL	2013	150	64835	40828	44097	64029	37197	37834	26146	TRUE	TRUE	FALSE	FALSE	FALSE	718308	biofilm metagenome													2011-07-19T00:00:00Z	GAZ:Scotland	55.906	-3.204	0.2	0
755.SSFA.L2.D20.21.06.11.lane1.NoIndex.L001	CGAGGTTCTGAT	GTGCCAGCMGCCGCGGTAA	samples of sand from slow_sand filter water purification system	XXQIITAXX	755	Replicating the microbial community and water quality performance of full-scale slow sand filters in laboratory-scale filters	Sarah Haig	10.1016/j.watres.2014.05.008	ERP020510	16S rRNA	V4	FWD:GTGCCAGCMGCCGCGGTAA; REV:GGACTACHVGGGTWTCTAAT	HiSeq	ANL-Chicago	ANL	2013	150	52253	31491	34068	51578	30818	31324	22026	TRUE	TRUE	FALSE	FALSE	FALSE	718308	biofilm metagenome													2011-06-21T00:00:00Z	GAZ:Scotland	55.906	-3.204	0.2	0
755.SSFA.L2.D20.24.08.11.lane1.NoIndex.L001	ACGGCTAGTTCC	GTGCCAGCMGCCGCGGTAA	samples of sand from slow_sand filter water purification system	XXQIITAXX	755	Replicating the microbial community and water quality performance of full-scale slow sand filters in laboratory-scale filters	Sarah Haig	10.1016/j.watres.2014.05.008	ERP020510	16S rRNA	V4	FWD:GTGCCAGCMGCCGCGGTAA; REV:GGACTACHVGGGTWTCTAAT	HiSeq	ANL-Chicago	ANL	2013	150	63159	39544	42625	62343	36428	36792	26041	TRUE	TRUE	FALSE	FALSE	FALSE	718308	biofilm metagenome													2011-08-24T00:00:00Z	GAZ:Scotland	55.906	-3.204	0.2	0
755.SSFA.L2.D20.26.07.11.lane1.NoIndex.L001	CGCGAAGTTTCA	GTGCCAGCMGCCGCGGTAA	samples of sand from slow_sand filter water purification system	XXQIITAXX	755	Replicating the microbial community and water quality performance of full-scale slow sand filters in laboratory-scale filters	Sarah Haig	10.1016/j.watres.2014.05.008	ERP020510	16S rRNA	V4	FWD:GTGCCAGCMGCCGCGGTAA; REV:GGACTACHVGGGTWTCTAAT	HiSeq	ANL-Chicago	ANL	2013	150	59079	45205	46648	58595	35887	36202	28393	TRUE	TRUE	FALSE	FALSE	FALSE	718308	biofilm metagenome													2011-07-26T00:00:00Z	GAZ:Scotland	55.906	-3.204	0.2	0
755.SSFA.L2.D20.31.05.11.lane1.NoIndex.L001	ACCCATACAGCC	GTGCCAGCMGCCGCGGTAA	samples of sand from slow_sand filter water purification system	XXQIITAXX	755	Replicating the microbial community and water quality performance of full-scale slow sand filters in laboratory-scale filters	Sarah Haig	10.1016/j.watres.2014.05.008	ERP020510	16S rRNA	V4	FWD:GTGCCAGCMGCCGCGGTAA; REV:GGACTACHVGGGTWTCTAAT	HiSeq	ANL-Chicago	ANL	2013	150	85858	56737	60954	84952	49103	50299	37165	TRUE	TRUE	FALSE	FALSE	FALSE	718308	biofilm metagenome													2011-05-31T00:00:00Z	GAZ:Scotland	55.906	-3.204	0.2	0
755.SSFA.L2.D3.03.05.11.lane1.NoIndex.L001	CCGAGGTATAAT	GTGCCAGCMGCCGCGGTAA	samples of sand from slow_sand filter water purification system	XXQIITAXX	755	Replicating the microbial community and water quality performance of full-scale slow sand filters in laboratory-scale filters	Sarah Haig	10.1016/j.watres.2014.05.008	ERP020510	16S rRNA	V4	FWD:GTGCCAGCMGCCGCGGTAA; REV:GGACTACHVGGGTWTCTAAT	HiSeq	ANL-Chicago	ANL	2013	150	100685	63066	67926	99089	56183	57373	40915	TRUE	TRUE	FALSE	FALSE	FALSE	718308	biofilm metagenome													2011-05-03T00:00:00Z	GAZ:Scotland	55.906	-3.204	0.03	0
755.SSFA.L2.D3.06.07.11.lane1.NoIndex.L001	AGATGTCCGTCA	GTGCCAGCMGCCGCGGTAA	samples of sand from slow_sand filter water purification system	XXQIITAXX	755	Replicating the microbial community and water quality performance of full-scale slow sand filters in laboratory-scale filters	Sarah Haig	10.1016/j.watres.2014.05.008	ERP020510	16S rRNA	V4	FWD:GTGCCAGCMGCCGCGGTAA; REV:GGACTACHVGGGTWTCTAAT	HiSeq	ANL-Chicago	ANL	2013	150	114443	66838	73088	112707	62313	63947	46641	TRUE	TRUE	FALSE	FALSE	FALSE	718308	biofilm metagenome													2011-07-06T00:00:00Z	GAZ:Scotland	55.906	-3.204	0.03	0
755.SSFA.L2.D3.14.06.11.lane1.NoIndex.L001	ACGCACATACAA	GTGCCAGCMGCCGCGGTAA	samples of sand from slow_sand filter water purification system	XXQIITAXX	755	Replicating the microbial community and water quality performance of full-scale slow sand filters in laboratory-scale filters	Sarah Haig	10.1016/j.watres.2014.05.008	ERP020510	16S rRNA	V4	FWD:GTGCCAGCMGCCGCGGTAA; REV:GGACTACHVGGGTWTCTAAT	HiSeq	ANL-Chicago	ANL	2013	150	104792	65374	70963	103474	58085	58934	42607	TRUE	TRUE	FALSE	FALSE	FALSE	718308	biofilm metagenome													2011-06-14T00:00:00Z	GAZ:Scotland	55.906	-3.204	0.03	0
755.SSFA.L2.D3.19.07.11.lane1.NoIndex.L001	AGCCAGTCATAC	GTGCCAGCMGCCGCGGTAA	samples of sand from slow_sand filter water purification system	XXQIITAXX	755	Replicating the microbial community and water quality performance of full-scale slow sand filters in laboratory-scale filters	Sarah Haig	10.1016/j.watres.2014.05.008	ERP020510	16S rRNA	V4	FWD:GTGCCAGCMGCCGCGGTAA; REV:GGACTACHVGGGTWTCTAAT	HiSeq	ANL-Chicago	ANL	2013	150	65268	40885	44205	64418	36861	37586	27149	TRUE	TRUE	FALSE	FALSE	FALSE	718308	biofilm metagenome													2011-07-19T00:00:00Z	GAZ:Scotland	55.906	-3.204	0.03	0
755.SSFA.L2.D3.21.06.11.lane1.NoIndex.L001	TGACTAATGGCC	GTGCCAGCMGCCGCGGTAA	samples of sand from slow_sand filter water purification system	XXQIITAXX	755	Replicating the microbial community and water quality performance of full-scale slow sand filters in laboratory-scale filters	Sarah Haig	10.1016/j.watres.2014.05.008	ERP020510	16S rRNA	V4	FWD:GTGCCAGCMGCCGCGGTAA; REV:GGACTACHVGGGTWTCTAAT	HiSeq	ANL-Chicago	ANL	2013	150	61194	38426	41257	60364	34955	35412	25416	TRUE	TRUE	FALSE	FALSE	FALSE	718308	biofilm metagenome													2011-06-21T00:00:00Z	GAZ:Scotland	55.906	-3.204	0.03	0
755.SSFA.L2.D3.24.08.11.lane1.NoIndex.L001	CCTACCATTGTT	GTGCCAGCMGCCGCGGTAA	samples of sand from slow_sand filter water purification system	XXQIITAXX	755	Replicating the microbial community and water quality performance of full-scale slow sand filters in laboratory-scale filters	Sarah Haig	10.1016/j.watres.2014.05.008	ERP020510	16S rRNA	V4	FWD:GTGCCAGCMGCCGCGGTAA; REV:GGACTACHVGGGTWTCTAAT	HiSeq	ANL-Chicago	ANL	2013	150	76714	46885	50677	75539	42844	43709	32166	TRUE	TRUE	FALSE	FALSE	FALSE	718308	biofilm metagenome													2011-08-24T00:00:00Z	GAZ:Scotland	55.906	-3.204	0.03	0
755.SSFA.L2.D3.26.07.11.lane1.NoIndex.L001	GTTGATACGATG	GTGCCAGCMGCCGCGGTAA	samples of sand from slow_sand filter water purification system	XXQIITAXX	755	Replicating the microbial community and water quality performance of full-scale slow sand filters in laboratory-scale filters	Sarah Haig	10.1016/j.watres.2014.05.008	ERP020510	16S rRNA	V4	FWD:GTGCCAGCMGCCGCGGTAA; REV:GGACTACHVGGGTWTCTAAT	HiSeq	ANL-Chicago	ANL	2013	150	77944	59401	61440	77181	45015	45376	35410	TRUE	TRUE	FALSE	FALSE	FALSE	718308	biofilm metagenome													2011-07-26T00:00:00Z	GAZ:Scotland	55.906	-3.204	0.03	0
755.SSFA.L2.D30.06.07.11.lane1.NoIndex.L001	TTCTAGAGTGCG	GTGCCAGCMGCCGCGGTAA	samples of sand from slow_sand filter water purification system	XXQIITAXX	755	Replicating the microbial community and water quality performance of full-scale slow sand filters in laboratory-scale filters	Sarah Haig	10.1016/j.watres.2014.05.008	ERP020510	16S rRNA	V4	FWD:GTGCCAGCMGCCGCGGTAA; REV:GGACTACHVGGGTWTCTAAT	HiSeq	ANL-Chicago	ANL	2013	150	80077	47377	51599	78886	45824	46771	33210	TRUE	TRUE	FALSE	FALSE	FALSE	718308	biofilm metagenome													2011-07-06T00:00:00Z	GAZ:Scotland	55.906	-3.204	0.3	0
755.SSFA.L2.D30.10.05.11.lane1.NoIndex.L001	GTCGCCGTACAT	GTGCCAGCMGCCGCGGTAA	samples of sand from slow_sand filter water purification system	XXQIITAXX	755	Replicating the microbial community and water quality performance of full-scale slow sand filters in laboratory-scale filters	Sarah Haig	10.1016/j.watres.2014.05.008	ERP020510	16S rRNA	V4	FWD:GTGCCAGCMGCCGCGGTAA; REV:GGACTACHVGGGTWTCTAAT	HiSeq	ANL-Chicago	ANL	2013	150	75889	46264	50255	74991	44121	44997	31742	TRUE	TRUE	FALSE	FALSE	FALSE	718308	biofilm metagenome													2011-05-11T00:00:00Z	GAZ:Scotland	55.906	-3.204	0.3	0
755.SSFA.L2.D30.12.07.11.lane1.NoIndex.L001	TGAGTCATTGAG	GTGCCAGCMGCCGCGGTAA	samples of sand from slow_sand filter water purification system	XXQIITAXX	755	Replicating the microbial community and water quality performance of full-scale slow sand filters in laboratory-scale filters	Sarah Haig	10.1016/j.watres.2014.05.008	ERP020510	16S rRNA	V4	FWD:GTGCCAGCMGCCGCGGTAA; REV:GGACTACHVGGGTWTCTAAT	HiSeq	ANL-Chicago	ANL	2013	150	88837	58836	62963	87165	47244	48382	35121	TRUE	TRUE	FALSE	FALSE	FALSE	718308	biofilm metagenome													2011-07-12T00:00:00Z	GAZ:Scotland	55.906	-3.204	0.3	0
755.SSFA.L2.D30.14.06.11.lane1.NoIndex.L001	CCTAGTAAGCTG	GTGCCAGCMGCCGCGGTAA	samples of sand from slow_sand filter water purification system	XXQIITAXX	755	Replicating the microbial community and water quality performance of full-scale slow sand filters in laboratory-scale filters	Sarah Haig	10.1016/j.watres.2014.05.008	ERP020510	16S rRNA	V4	FWD:GTGCCAGCMGCCGCGGTAA; REV:GGACTACHVGGGTWTCTAAT	HiSeq	ANL-Chicago	ANL	2013	150	55907	34539	37125	55254	32921	33189	23560	TRUE	TRUE	FALSE	FALSE	FALSE	718308	biofilm metagenome													2011-06-14T00:00:00Z	GAZ:Scotland	55.906	-3.204	0.3	0
755.SSFA.L2.D30.17.05.11.lane1.NoIndex.L001	GCATTACTGGAC	GTGCCAGCMGCCGCGGTAA	samples of sand from slow_sand filter water purification system	XXQIITAXX	755	Replicating the microbial community and water quality performance of full-scale slow sand filters in laboratory-scale filters	Sarah Haig	10.1016/j.watres.2014.05.008	ERP020510	16S rRNA	V4	FWD:GTGCCAGCMGCCGCGGTAA; REV:GGACTACHVGGGTWTCTAAT	HiSeq	ANL-Chicago	ANL	2013	150	80768	57392	60308	79964	46912	47431	34928	TRUE	TRUE	FALSE	FALSE	FALSE	718308	biofilm metagenome													2011-05-17T00:00:00Z	GAZ:Scotland	55.906	-3.204	0.3	0
755.SSFA.L2.D30.19.04.11.lane1.NoIndex.L001	ACTCTAGCCGGT	GTGCCAGCMGCCGCGGTAA	samples of sand from slow_sand filter water purification system	XXQIITAXX	755	Replicating the microbial community and water quality performance of full-scale slow sand filters in laboratory-scale filters	Sarah Haig	10.1016/j.watres.2014.05.008	ERP020510	16S rRNA	V4	FWD:GTGCCAGCMGCCGCGGTAA; REV:GGACTACHVGGGTWTCTAAT	HiSeq	ANL-Chicago	ANL	2013	150	83446	53327	57425	82465	46633	48060	34889	TRUE	TRUE	FALSE	FALSE	FALSE	718308	biofilm metagenome													2011-04-19T00:00:00Z	GAZ:Scotland	55.906	-3.204	0.3	0
755.SSFA.L2.D30.19.07.11.lane1.NoIndex.L001	CGGTAGTTGATC	GTGCCAGCMGCCGCGGTAA	samples of sand from slow_sand filter water purification system	XXQIITAXX	755	Replicating the microbial community and water quality performance of full-scale slow sand filters in laboratory-scale filters	Sarah Haig	10.1016/j.watres.2014.05.008	ERP020510	16S rRNA	V4	FWD:GTGCCAGCMGCCGCGGTAA; REV:GGACTACHVGGGTWTCTAAT	HiSeq	ANL-Chicago	ANL	2013	150	70219	43934	47284	69240	39487	40057	28009	TRUE	TRUE	FALSE	FALSE	FALSE	718308	biofilm metagenome													2011-07-19T00:00:00Z	GAZ:Scotland	55.906	-3.204	0.3	0
755.SSFA.L2.D30.20.09.11.lane1.NoIndex.L001	TGTCCGTGGATC	GTGCCAGCMGCCGCGGTAA	samples of sand from slow_sand filter water purification system	XXQIITAXX	755	Replicating the microbial community and water quality performance of full-scale slow sand filters in laboratory-scale filters	Sarah Haig	10.1016/j.watres.2014.05.008	ERP020510	16S rRNA	V4	FWD:GTGCCAGCMGCCGCGGTAA; REV:GGACTACHVGGGTWTCTAAT	HiSeq	ANL-Chicago	ANL	2013	150	81313	52583	55921	79504	43238	43871	31122	TRUE	TRUE	FALSE	FALSE	FALSE	718308	biofilm metagenome													2011-09-20T00:00:00Z	GAZ:Scotland	55.906	-3.204	0.3	0
755.SSFA.L2.D30.24.08.11.lane1.NoIndex.L001	GAAGCTTGAATC	GTGCCAGCMGCCGCGGTAA	samples of sand from slow_sand filter water purification system	XXQIITAXX	755	Replicating the microbial community and water quality performance of full-scale slow sand filters in laboratory-scale filters	Sarah Haig	10.1016/j.watres.2014.05.008	ERP020510	16S rRNA	V4	FWD:GTGCCAGCMGCCGCGGTAA; REV:GGACTACHVGGGTWTCTAAT	HiSeq	ANL-Chicago	ANL	2013	150	65488	41219	44522	64676	37265	37881	27381	TRUE	TRUE	FALSE	FALSE	FALSE	718308	biofilm metagenome													2011-08-24T00:00:00Z	GAZ:Scotland	55.906	-3.204	0.3	0
755.SSFA.L2.D30.28.06.11.lane1.NoIndex.L001	TGGAGCCTTGTC	GTGCCAGCMGCCGCGGTAA	samples of sand from slow_sand filter water purification system	XXQIITAXX	755	Replicating the microbial community and water quality performance of full-scale slow sand filters in laboratory-scale filters	Sarah Haig	10.1016/j.watres.2014.05.008	ERP020510	16S rRNA	V4	FWD:GTGCCAGCMGCCGCGGTAA; REV:GGACTACHVGGGTWTCTAAT	HiSeq	ANL-Chicago	ANL	2013	150	78581	49396	53175	77570	44874	45973	33491	TRUE	TRUE	FALSE	FALSE	FALSE	718308	biofilm metagenome													2011-06-28T00:00:00Z	GAZ:Scotland	55.906	-3.204	0.3	0
755.SSFA.L2.D40.06.07.11.lane1.NoIndex.L001	TTGCCTGGGTCA	GTGCCAGCMGCCGCGGTAA	samples of sand from slow_sand filter water purification system	XXQIITAXX	755	Replicating the microbial community and water quality performance of full-scale slow sand filters in laboratory-scale filters	Sarah Haig	10.1016/j.watres.2014.05.008	ERP020510	16S rRNA	V4	FWD:GTGCCAGCMGCCGCGGTAA; REV:GGACTACHVGGGTWTCTAAT	HiSeq	ANL-Chicago	ANL	2013	150	65032	39284	42765	64083	36567	37223	25931	TRUE	TRUE	FALSE	FALSE	FALSE	718308	biofilm metagenome													2011-07-06T00:00:00Z	GAZ:Scotland	55.906	-3.204	0.4	0
755.SSFA.L2.D40.10.05.11.lane1.NoIndex.L001	GGTTTAACACGC	GTGCCAGCMGCCGCGGTAA	samples of sand from slow_sand filter water purification system	XXQIITAXX	755	Replicating the microbial community and water quality performance of full-scale slow sand filters in laboratory-scale filters	Sarah Haig	10.1016/j.watres.2014.05.008	ERP020510	16S rRNA	V4	FWD:GTGCCAGCMGCCGCGGTAA; REV:GGACTACHVGGGTWTCTAAT	HiSeq	ANL-Chicago	ANL	2013	150	90378	54790	59408	89053	50562	51598	36643	TRUE	TRUE	FALSE	FALSE	FALSE	718308	biofilm metagenome													2011-05-11T00:00:00Z	GAZ:Scotland	55.906	-3.204	0.4	0
755.SSFA.L2.D40.17.05.11.lane1.NoIndex.L001	GAGTACAGTCTA	GTGCCAGCMGCCGCGGTAA	samples of sand from slow_sand filter water purification system	XXQIITAXX	755	Replicating the microbial community and water quality performance of full-scale slow sand filters in laboratory-scale filters	Sarah Haig	10.1016/j.watres.2014.05.008	ERP020510	16S rRNA	V4	FWD:GTGCCAGCMGCCGCGGTAA; REV:GGACTACHVGGGTWTCTAAT	HiSeq	ANL-Chicago	ANL	2013	150	80607	57648	60181	79671	46998	48293	35236	TRUE	TRUE	FALSE	FALSE	FALSE	718308	biofilm metagenome													2011-05-17T00:00:00Z	GAZ:Scotland	55.906	-3.204	0.4	0
755.SSFA.L2.D40.19.04.11.lane1.NoIndex.L001	ATTAAGCCTGGA	GTGCCAGCMGCCGCGGTAA	samples of sand from slow_sand filter water purification system	XXQIITAXX	755	Replicating the microbial community and water quality performance of full-scale slow sand filters in laboratory-scale filters	Sarah Haig	10.1016/j.watres.2014.05.008	ERP020510	16S rRNA	V4	FWD:GTGCCAGCMGCCGCGGTAA; REV:GGACTACHVGGGTWTCTAAT	HiSeq	ANL-Chicago	ANL	2013	150	90829	57922	62474	89464	50185	51503	37403	TRUE	TRUE	FALSE	FALSE	FALSE	718308	biofilm metagenome													2011-04-19T00:00:00Z	GAZ:Scotland	55.906	-3.204	0.4	0
755.SSFA.L2.D40.20.09.11.lane1.NoIndex.L001	ACACCGCACAAT	GTGCCAGCMGCCGCGGTAA	samples of sand from slow_sand filter water purification system	XXQIITAXX	755	Replicating the microbial community and water quality performance of full-scale slow sand filters in laboratory-scale filters	Sarah Haig	10.1016/j.watres.2014.05.008	ERP020510	16S rRNA	V4	FWD:GTGCCAGCMGCCGCGGTAA; REV:GGACTACHVGGGTWTCTAAT	HiSeq	ANL-Chicago	ANL	2013	150	81781	54229	57503	80220	43423	44075	32035	TRUE	TRUE	TRUE	FALSE	FALSE	718308	biofilm metagenome													2011-09-20T00:00:00Z	GAZ:Scotland	55.906	-3.204	0.4	0
755.SSFA.L2.D40.21.06.11.lane1.NoIndex.L001	GCAATCCTTGCG	GTGCCAGCMGCCGCGGTAA	samples of sand from slow_sand filter water purification system	XXQIITAXX	755	Replicating the microbial community and water quality performance of full-scale slow sand filters in laboratory-scale filters	Sarah Haig	10.1016/j.watres.2014.05.008	ERP020510	16S rRNA	V4	FWD:GTGCCAGCMGCCGCGGTAA; REV:GGACTACHVGGGTWTCTAAT	HiSeq	ANL-Chicago	ANL	2013	150	58404	35385	38094	57601	33129	33527	23667	TRUE	TRUE	FALSE	FALSE	FALSE	718308	biofilm metagenome													2011-06-21T00:00:00Z	GAZ:Scotland	55.906	-3.204	0.4	0
755.SSFA.L2.D40.24.08.11.lane1.NoIndex.L001	GCTAAAGTCGTA	GTGCCAGCMGCCGCGGTAA	samples of sand from slow_sand filter water purification system	XXQIITAXX	755	Replicating the microbial community and water quality performance of full-scale slow sand filters in laboratory-scale filters	Sarah Haig	10.1016/j.watres.2014.05.008	ERP020510	16S rRNA	V4	FWD:GTGCCAGCMGCCGCGGTAA; REV:GGACTACHVGGGTWTCTAAT	HiSeq	ANL-Chicago	ANL	2013	150	93020	59258	64035	91775	51862	52864	38850	TRUE	TRUE	FALSE	FALSE	FALSE	718308	biofilm metagenome													2011-08-24T00:00:00Z	GAZ:Scotland	55.906	-3.204	0.4	0
755.SSFA.L2.D40.26.07.11.lane1.NoIndex.L001	GCATTGAGTTCG	GTGCCAGCMGCCGCGGTAA	samples of sand from slow_sand filter water purification system	XXQIITAXX	755	Replicating the microbial community and water quality performance of full-scale slow sand filters in laboratory-scale filters	Sarah Haig	10.1016/j.watres.2014.05.008	ERP020510	16S rRNA	V4	FWD:GTGCCAGCMGCCGCGGTAA; REV:GGACTACHVGGGTWTCTAAT	HiSeq	ANL-Chicago	ANL	2013	150	87980	69906	71611	87222	52522	52654	40888	TRUE	TRUE	FALSE	FALSE	FALSE	718308	biofilm metagenome													2011-07-26T00:00:00Z	GAZ:Scotland	55.906	-3.204	0.4	0
755.SSFA.L2.D40.28.06.11.lane1.NoIndex.L001	TGCACAGTCGCT	GTGCCAGCMGCCGCGGTAA	samples of sand from slow_sand filter water purification system	XXQIITAXX	755	Replicating the microbial community and water quality performance of full-scale slow sand filters in laboratory-scale filters	Sarah Haig	10.1016/j.watres.2014.05.008	ERP020510	16S rRNA	V4	FWD:GTGCCAGCMGCCGCGGTAA; REV:GGACTACHVGGGTWTCTAAT	HiSeq	ANL-Chicago	ANL	2013	150	85930	52981	57185	84739	47861	48933	34770	TRUE	TRUE	FALSE	FALSE	FALSE	718308	biofilm metagenome													2011-06-28T00:00:00Z	GAZ:Scotland	55.906	-3.204	0.4	0
755.SSFA.L2.D40.31.05.11.lane1.NoIndex.L001	AATAGCATGTCG	GTGCCAGCMGCCGCGGTAA	samples of sand from slow_sand filter water purification system	XXQIITAXX	755	Replicating the microbial community and water quality performance of full-scale slow sand filters in laboratory-scale filters	Sarah Haig	10.1016/j.watres.2014.05.008	ERP020510	16S rRNA	V4	FWD:GTGCCAGCMGCCGCGGTAA; REV:GGACTACHVGGGTWTCTAAT	HiSeq	ANL-Chicago	ANL	2013	150	75190	51329	54635	74372	43973	44436	32796	TRUE	TRUE	FALSE	FALSE	FALSE	718308	biofilm metagenome													2011-05-31T00:00:00Z	GAZ:Scotland	55.906	-3.204	0.4	0
755.SSFA.L2.D5.03.05.11.lane1.NoIndex.L001	GAGACGTGTTCT	GTGCCAGCMGCCGCGGTAA	samples of sand from slow_sand filter water purification system	XXQIITAXX	755	Replicating the microbial community and water quality performance of full-scale slow sand filters in laboratory-scale filters	Sarah Haig	10.1016/j.watres.2014.05.008	ERP020510	16S rRNA	V4	FWD:GTGCCAGCMGCCGCGGTAA; REV:GGACTACHVGGGTWTCTAAT	HiSeq	ANL-Chicago	ANL	2013	150	89533	56187	60545	88231	50424	51476	36580	TRUE	TRUE	FALSE	FALSE	FALSE	718308	biofilm metagenome													2011-05-03T00:00:00Z	GAZ:Scotland	55.906	-3.204	0.05	0
755.SSFA.L2.D5.06.07.11.lane1.NoIndex.L001	CGAGTTCATCGA	GTGCCAGCMGCCGCGGTAA	samples of sand from slow_sand filter water purification system	XXQIITAXX	755	Replicating the microbial community and water quality performance of full-scale slow sand filters in laboratory-scale filters	Sarah Haig	10.1016/j.watres.2014.05.008	ERP020510	16S rRNA	V4	FWD:GTGCCAGCMGCCGCGGTAA; REV:GGACTACHVGGGTWTCTAAT	HiSeq	ANL-Chicago	ANL	2013	150	69498	42120	45882	68623	40092	40964	29749	TRUE	TRUE	FALSE	FALSE	FALSE	718308	biofilm metagenome													2011-07-06T00:00:00Z	GAZ:Scotland	55.906	-3.204	0.05	0
755.SSFA.L2.D5.10.05.11.lane1.NoIndex.L001	ATAACATGTGCG	GTGCCAGCMGCCGCGGTAA	samples of sand from slow_sand filter water purification system	XXQIITAXX	755	Replicating the microbial community and water quality performance of full-scale slow sand filters in laboratory-scale filters	Sarah Haig	10.1016/j.watres.2014.05.008	ERP020510	16S rRNA	V4	FWD:GTGCCAGCMGCCGCGGTAA; REV:GGACTACHVGGGTWTCTAAT	HiSeq	ANL-Chicago	ANL	2013	150	85432	51908	56042	84179	49037	49867	35805	TRUE	TRUE	FALSE	FALSE	FALSE	718308	biofilm metagenome													2011-05-11T00:00:00Z	GAZ:Scotland	55.906	-3.204	0.05	0
755.SSFA.L2.D5.14.06.11.lane1.NoIndex.L001	TACGCAGCACTA	GTGCCAGCMGCCGCGGTAA	samples of sand from slow_sand filter water purification system	XXQIITAXX	755	Replicating the microbial community and water quality performance of full-scale slow sand filters in laboratory-scale filters	Sarah Haig	10.1016/j.watres.2014.05.008	ERP020510	16S rRNA	V4	FWD:GTGCCAGCMGCCGCGGTAA; REV:GGACTACHVGGGTWTCTAAT	HiSeq	ANL-Chicago	ANL	2013	150	76344	48023	51908	75326	42465	42959	30719	TRUE	TRUE	TRUE	FALSE	FALSE	718308	biofilm metagenome													2011-06-14T00:00:00Z	GAZ:Scotland	55.906	-3.204	0.05	0
755.SSFA.L2.D5.19.04.11.lane1.NoIndex.L001	ATTTAGGACGAC	GTGCCAGCMGCCGCGGTAA	samples of sand from slow_sand filter water purification system	XXQIITAXX	755	Replicating the microbial community and water quality performance of full-scale slow sand filters in laboratory-scale filters	Sarah Haig	10.1016/j.watres.2014.05.008	ERP020510	16S rRNA	V4	FWD:GTGCCAGCMGCCGCGGTAA; REV:GGACTACHVGGGTWTCTAAT	HiSeq	ANL-Chicago	ANL	2013	150	51345	32654	35367	50663	29489	30266	22293	TRUE	TRUE	FALSE	FALSE	FALSE	718308	biofilm metagenome													2011-04-19T00:00:00Z	GAZ:Scotland	55.906	-3.204	0.05	0
755.SSFA.L2.D5.20.09.11.lane1.NoIndex.L001	CATTTGACGACG	GTGCCAGCMGCCGCGGTAA	samples of sand from slow_sand filter water purification system	XXQIITAXX	755	Replicating the microbial community and water quality performance of full-scale slow sand filters in laboratory-scale filters	Sarah Haig	10.1016/j.watres.2014.05.008	ERP020510	16S rRNA	V4	FWD:GTGCCAGCMGCCGCGGTAA; REV:GGACTACHVGGGTWTCTAAT	HiSeq	ANL-Chicago	ANL	2013	150	63759	42920	45841	62416	33530	34268	25965	TRUE	TRUE	FALSE	FALSE	FALSE	718308	biofilm metagenome													2011-09-20T00:00:00Z	GAZ:Scotland	55.906	-3.204	0.05	0
755.SSFA.L2.D5.24.08.11.lane1.NoIndex.L001	GTATTGGTCAGA	GTGCCAGCMGCCGCGGTAA	samples of sand from slow_sand filter water purification system	XXQIITAXX	755	Replicating the microbial community and water quality performance of full-scale slow sand filters in laboratory-scale filters	Sarah Haig	10.1016/j.watres.2014.05.008	ERP020510	16S rRNA	V4	FWD:GTGCCAGCMGCCGCGGTAA; REV:GGACTACHVGGGTWTCTAAT	HiSeq	ANL-Chicago	ANL	2013	150	72422	45273	48561	71259	39532	40610	30275	TRUE	TRUE	FALSE	FALSE	FALSE	718308	biofilm metagenome													2011-08-24T00:00:00Z	GAZ:Scotland	55.906	-3.204	0.05	0
755.SSFA.L2.D5.26.07.11.lane1.NoIndex.L001	ACCGATTAGGTA	GTGCCAGCMGCCGCGGTAA	samples of sand from slow_sand filter water purification system	XXQIITAXX	755	Replicating the microbial community and water quality performance of full-scale slow sand filters in laboratory-scale filters	Sarah Haig	10.1016/j.watres.2014.05.008	ERP020510	16S rRNA	V4	FWD:GTGCCAGCMGCCGCGGTAA; REV:GGACTACHVGGGTWTCTAAT	HiSeq	ANL-Chicago	ANL	2013	150	70580	55381	56919	70012	43351	43822	34515	TRUE	TRUE	FALSE	FALSE	FALSE	718308	biofilm metagenome													2011-07-26T00:00:00Z	GAZ:Scotland	55.906	-3.204	0.05	0
755.SSFA.L2.D5.31.05.11.lane1.NoIndex.L001	TTCTCATGGAGG	GTGCCAGCMGCCGCGGTAA	samples of sand from slow_sand filter water purification system	XXQIITAXX	755	Replicating the microbial community and water quality performance of full-scale slow sand filters in laboratory-scale filters	Sarah Haig	10.1016/j.watres.2014.05.008	ERP020510	16S rRNA	V4	FWD:GTGCCAGCMGCCGCGGTAA; REV:GGACTACHVGGGTWTCTAAT	HiSeq	ANL-Chicago	ANL	2013	150	74096	49217	52554	72968	41922	42694	31578	TRUE	TRUE	FALSE	FALSE	FALSE	718308	biofilm metagenome													2011-05-31T00:00:00Z	GAZ:Scotland	55.906	-3.204	0.05	0
755.SSFA.L2.D50.06.07.11.lane1.NoIndex.L001	ACTAGCGTTCAG	GTGCCAGCMGCCGCGGTAA	samples of sand from slow_sand filter water purification system	XXQIITAXX	755	Replicating the microbial community and water quality performance of full-scale slow sand filters in laboratory-scale filters	Sarah Haig	10.1016/j.watres.2014.05.008	ERP020510	16S rRNA	V4	FWD:GTGCCAGCMGCCGCGGTAA; REV:GGACTACHVGGGTWTCTAAT	HiSeq	ANL-Chicago	ANL	2013	150	79458	48394	52679	78266	44468	45351	32384	TRUE	TRUE	FALSE	FALSE	FALSE	718308	biofilm metagenome													2011-07-06T00:00:00Z	GAZ:Scotland	55.906	-3.204	0.5	0
755.SSFA.L2.D50.10.05.11.lane1.NoIndex.L001	CTCCCTTTGTGT	GTGCCAGCMGCCGCGGTAA	samples of sand from slow_sand filter water purification system	XXQIITAXX	755	Replicating the microbial community and water quality performance of full-scale slow sand filters in laboratory-scale filters	Sarah Haig	10.1016/j.watres.2014.05.008	ERP020510	16S rRNA	V4	FWD:GTGCCAGCMGCCGCGGTAA; REV:GGACTACHVGGGTWTCTAAT	HiSeq	ANL-Chicago	ANL	2013	150	81919	51223	55623	80793	47171	48407	34941	TRUE	TRUE	TRUE	FALSE	FALSE	718308	biofilm metagenome													2011-05-11T00:00:00Z	GAZ:Scotland	55.906	-3.204	0.5	0
755.SSFA.L2.D50.12.07.11.lane1.NoIndex.L001	GCAAGCTGTCTC	GTGCCAGCMGCCGCGGTAA	samples of sand from slow_sand filter water purification system	XXQIITAXX	755	Replicating the microbial community and water quality performance of full-scale slow sand filters in laboratory-scale filters	Sarah Haig	10.1016/j.watres.2014.05.008	ERP020510	16S rRNA	V4	FWD:GTGCCAGCMGCCGCGGTAA; REV:GGACTACHVGGGTWTCTAAT	HiSeq	ANL-Chicago	ANL	2013	150	95595	60010	64968	94021	52380	53458	38365	TRUE	TRUE	FALSE	FALSE	FALSE	718308	biofilm metagenome													2011-07-12T00:00:00Z	GAZ:Scotland	55.906	-3.204	0.5	0
755.SSFA.L2.D50.17.05.11.lane1.NoIndex.L001	GATCCTCATGCG	GTGCCAGCMGCCGCGGTAA	samples of sand from slow_sand filter water purification system	XXQIITAXX	755	Replicating the microbial community and water quality performance of full-scale slow sand filters in laboratory-scale filters	Sarah Haig	10.1016/j.watres.2014.05.008	ERP020510	16S rRNA	V4	FWD:GTGCCAGCMGCCGCGGTAA; REV:GGACTACHVGGGTWTCTAAT	HiSeq	ANL-Chicago	ANL	2013	150	95163	68481	71543	93920	53389	54104	40845	TRUE	TRUE	FALSE	FALSE	FALSE	718308	biofilm metagenome													2011-05-17T00:00:00Z	GAZ:Scotland	55.906	-3.204	0.5	0
755.SSFA.L2.D50.19.04.11.lane1.NoIndex.L001	CTGGGTATCTCG	GTGCCAGCMGCCGCGGTAA	samples of sand from slow_sand filter water purification system	XXQIITAXX	755	Replicating the microbial community and water quality performance of full-scale slow sand filters in laboratory-scale filters	Sarah Haig	10.1016/j.watres.2014.05.008	ERP020510	16S rRNA	V4	FWD:GTGCCAGCMGCCGCGGTAA; REV:GGACTACHVGGGTWTCTAAT	HiSeq	ANL-Chicago	ANL	2013	150	113552	74278	79340	111983	62966	65079	47959	TRUE	TRUE	FALSE	FALSE	FALSE	718308	biofilm metagenome													2011-04-19T00:00:00Z	GAZ:Scotland	55.906	-3.204	0.5	0
755.SSFA.L2.D50.20.09.11.lane1.NoIndex.L001	TCCAGGGCTATA	GTGCCAGCMGCCGCGGTAA	samples of sand from slow_sand filter water purification system	XXQIITAXX	755	Replicating the microbial community and water quality performance of full-scale slow sand filters in laboratory-scale filters	Sarah Haig	10.1016/j.watres.2014.05.008	ERP020510	16S rRNA	V4	FWD:GTGCCAGCMGCCGCGGTAA; REV:GGACTACHVGGGTWTCTAAT	HiSeq	ANL-Chicago	ANL	2013	150	76632	49413	52766	75166	41397	41835	29508	TRUE	TRUE	FALSE	FALSE	FALSE	718308	biofilm metagenome													2011-09-20T00:00:00Z	GAZ:Scotland	55.906	-3.204	0.5	0
755.SSFA.L2.D50.24.08.11.lane1.NoIndex.L001	ACGAAGTCTACC	GTGCCAGCMGCCGCGGTAA	samples of sand from slow_sand filter water purification system	XXQIITAXX	755	Replicating the microbial community and water quality performance of full-scale slow sand filters in laboratory-scale filters	Sarah Haig	10.1016/j.watres.2014.05.008	ERP020510	16S rRNA	V4	FWD:GTGCCAGCMGCCGCGGTAA; REV:GGACTACHVGGGTWTCTAAT	HiSeq	ANL-Chicago	ANL	2013	150	91172	58193	62772	90017	50817	51926	37810	TRUE	TRUE	FALSE	FALSE	FALSE	718308	biofilm metagenome													2011-08-24T00:00:00Z	GAZ:Scotland	55.906	-3.204	0.5	0
755.SSFA.L2.D50.28.06.11.lane1.NoIndex.L001	ATAGAGGCCATT	GTGCCAGCMGCCGCGGTAA	samples of sand from slow_sand filter water purification system	XXQIITAXX	755	Replicating the microbial community and water quality performance of full-scale slow sand filters in laboratory-scale filters	Sarah Haig	10.1016/j.watres.2014.05.008	ERP020510	16S rRNA	V4	FWD:GTGCCAGCMGCCGCGGTAA; REV:GGACTACHVGGGTWTCTAAT	HiSeq	ANL-Chicago	ANL	2013	150	69630	43447	46782	68760	39285	40178	28549	TRUE	TRUE	FALSE	FALSE	FALSE	718308	biofilm metagenome													2011-06-28T00:00:00Z	GAZ:Scotland	55.906	-3.204	0.5	0
755.SSFA.L3.2.D10.21.06.11.lane1.NoIndex.L001	ATCAGAGCCCAT	GTGCCAGCMGCCGCGGTAA	samples of sand from slow_sand filter water purification system	XXQIITAXX	755	Replicating the microbial community and water quality performance of full-scale slow sand filters in laboratory-scale filters	Sarah Haig	10.1016/j.watres.2014.05.008	ERP020510	16S rRNA	V4	FWD:GTGCCAGCMGCCGCGGTAA; REV:GGACTACHVGGGTWTCTAAT	HiSeq	ANL-Chicago	ANL	2013	150	68425	46081	49315	67737	40977	41883	31056	TRUE	TRUE	FALSE	FALSE	FALSE	718308	biofilm metagenome													2011-06-21T00:00:00Z	GAZ:Scotland	55.905	-3.204	0.1	0
755.SSFA.L3.2.D20.21.06.11.lane1.NoIndex.L001	TGTGTTACTCCT	GTGCCAGCMGCCGCGGTAA	samples of sand from slow_sand filter water purification system	XXQIITAXX	755	Replicating the microbial community and water quality performance of full-scale slow sand filters in laboratory-scale filters	Sarah Haig	10.1016/j.watres.2014.05.008	ERP020510	16S rRNA	V4	FWD:GTGCCAGCMGCCGCGGTAA; REV:GGACTACHVGGGTWTCTAAT	HiSeq	ANL-Chicago	ANL	2013	150	78189	52570	56212	77281	45013	46005	34055	TRUE	TRUE	FALSE	FALSE	FALSE	718308	biofilm metagenome													2011-06-21T00:00:00Z	GAZ:Scotland	55.905	-3.204	0.2	0
755.SSFA.L3.2.D30.21.06.11.lane1.NoIndex.L001	TCCGTCATGGGT	GTGCCAGCMGCCGCGGTAA	samples of sand from slow_sand filter water purification system	XXQIITAXX	755	Replicating the microbial community and water quality performance of full-scale slow sand filters in laboratory-scale filters	Sarah Haig	10.1016/j.watres.2014.05.008	ERP020510	16S rRNA	V4	FWD:GTGCCAGCMGCCGCGGTAA; REV:GGACTACHVGGGTWTCTAAT	HiSeq	ANL-Chicago	ANL	2013	150	67572	47115	50049	66890	40052	40991	30741	TRUE	TRUE	FALSE	FALSE	FALSE	718308	biofilm metagenome													2011-06-21T00:00:00Z	GAZ:Scotland	55.905	-3.204	0.3	0
755.SSFA.L3.2.D40.21.06.11.lane1.NoIndex.L001	GTCAATTAGTGG	GTGCCAGCMGCCGCGGTAA	samples of sand from slow_sand filter water purification system	XXQIITAXX	755	Replicating the microbial community and water quality performance of full-scale slow sand filters in laboratory-scale filters	Sarah Haig	10.1016/j.watres.2014.05.008	ERP020510	16S rRNA	V4	FWD:GTGCCAGCMGCCGCGGTAA; REV:GGACTACHVGGGTWTCTAAT	HiSeq	ANL-Chicago	ANL	2013	150	72063	48179	51094	71075	41032	41891	31238	TRUE	TRUE	FALSE	FALSE	FALSE	718308	biofilm metagenome													2011-06-21T00:00:00Z	GAZ:Scotland	55.905	-3.204	0.4	0
755.SSFA.L3.2.D5.21.06.11.lane1.NoIndex.L001	AAGAGCAGAGCC	GTGCCAGCMGCCGCGGTAA	samples of sand from slow_sand filter water purification system	XXQIITAXX	755	Replicating the microbial community and water quality performance of full-scale slow sand filters in laboratory-scale filters	Sarah Haig	10.1016/j.watres.2014.05.008	ERP020510	16S rRNA	V4	FWD:GTGCCAGCMGCCGCGGTAA; REV:GGACTACHVGGGTWTCTAAT	HiSeq	ANL-Chicago	ANL	2013	150	62908	41840	44937	62257	37252	38028	28168	TRUE	TRUE	FALSE	FALSE	FALSE	718308	biofilm metagenome													2011-06-21T00:00:00Z	GAZ:Scotland	55.905	-3.204	0.05	0
755.SSFA.L3.2.D50.21.06.11.lane1.NoIndex.L001	GTGGTATGGGAG	GTGCCAGCMGCCGCGGTAA	samples of sand from slow_sand filter water purification system	XXQIITAXX	755	Replicating the microbial community and water quality performance of full-scale slow sand filters in laboratory-scale filters	Sarah Haig	10.1016/j.watres.2014.05.008	ERP020510	16S rRNA	V4	FWD:GTGCCAGCMGCCGCGGTAA; REV:GGACTACHVGGGTWTCTAAT	HiSeq	ANL-Chicago	ANL	2013	150	79894	52830	55956	78803	45027	46157	33749	TRUE	TRUE	FALSE	FALSE	FALSE	718308	biofilm metagenome													2011-06-21T00:00:00Z	GAZ:Scotland	55.905	-3.204	0.5	0
755.SSFA.L3.2.D50.21.06.11.lane1.NoIndex.L001	GTGGTATGGGAG	GTGCCAGCMGCCGCGGTAA	samples of sand from slow_sand filter water purification system	XXQIITAXX	755	Replicating the microbial community and water quality performance of full-scale slow sand filters in laboratory-scale filters	Sarah Haig	10.1016/j.watres.2014.05.008	ERP020510	16S rRNA	V4	FWD:GTGCCAGCMGCCGCGGTAA; REV:GGACTACHVGGGTWTCTAAT	HiSeq	ANL-Chicago	ANL	2013	150	79894	52830	55956	78803	45027	46157	33749	TRUE	TRUE	FALSE	FALSE	FALSE	718308	biofilm metagenome													2011-06-21T00:00:00Z	GAZ:Scotland	55.905	-3.204	0.5	0
755.SSFA.L3.3.D1.21.06.11.lane1.NoIndex.L001	GACGCTTTGCTG	GTGCCAGCMGCCGCGGTAA	samples of sand from slow_sand filter water purification system	XXQIITAXX	755	Replicating the microbial community and water quality performance of full-scale slow sand filters in laboratory-scale filters	Sarah Haig	10.1016/j.watres.2014.05.008	ERP020510	16S rRNA	V4	FWD:GTGCCAGCMGCCGCGGTAA; REV:GGACTACHVGGGTWTCTAAT	HiSeq	ANL-Chicago	ANL	2013	150	55658	40667	42783	55261	35566	36080	27856	TRUE	TRUE	FALSE	FALSE	FALSE	718308	biofilm metagenome													2011-06-21T00:00:00Z	GAZ:Scotland	55.905	-3.204	0.01	0
755.SSFA.L3.3.D10.21.06.11.lane1.NoIndex.L001	CCGACTCTAGGT	GTGCCAGCMGCCGCGGTAA	samples of sand from slow_sand filter water purification system	XXQIITAXX	755	Replicating the microbial community and water quality performance of full-scale slow sand filters in laboratory-scale filters	Sarah Haig	10.1016/j.watres.2014.05.008	ERP020510	16S rRNA	V4	FWD:GTGCCAGCMGCCGCGGTAA; REV:GGACTACHVGGGTWTCTAAT	HiSeq	ANL-Chicago	ANL	2013	150	61779	42278	45019	61229	37287	38055	28534	TRUE	TRUE	FALSE	FALSE	FALSE	718308	biofilm metagenome													2011-06-21T00:00:00Z	GAZ:Scotland	55.905	-3.204	0.1	0
755.SSFA.L3.3.D30.21.06.11.lane1.NoIndex.L001	GCACAAGGCAAG	GTGCCAGCMGCCGCGGTAA	samples of sand from slow_sand filter water purification system	XXQIITAXX	755	Replicating the microbial community and water quality performance of full-scale slow sand filters in laboratory-scale filters	Sarah Haig	10.1016/j.watres.2014.05.008	ERP020510	16S rRNA	V4	FWD:GTGCCAGCMGCCGCGGTAA; REV:GGACTACHVGGGTWTCTAAT	HiSeq	ANL-Chicago	ANL	2013	150	89511	62182	65740	88517	52736	53847	40477	TRUE	TRUE	FALSE	FALSE	FALSE	718308	biofilm metagenome													2011-06-21T00:00:00Z	GAZ:Scotland	55.905	-3.204	0.3	0
755.SSFA.L3.3.D40.21.06.11.lane1.NoIndex.L001	AGCAGCTATTGC	GTGCCAGCMGCCGCGGTAA	samples of sand from slow_sand filter water purification system	XXQIITAXX	755	Replicating the microbial community and water quality performance of full-scale slow sand filters in laboratory-scale filters	Sarah Haig	10.1016/j.watres.2014.05.008	ERP020510	16S rRNA	V4	FWD:GTGCCAGCMGCCGCGGTAA; REV:GGACTACHVGGGTWTCTAAT	HiSeq	ANL-Chicago	ANL	2013	150	68673	46712	49413	67781	39675	40515	30426	TRUE	TRUE	FALSE	FALSE	FALSE	718308	biofilm metagenome													2011-06-21T00:00:00Z	GAZ:Scotland	55.905	-3.204	0.4	0
755.SSFA.L3.3.D50.21.06.11.lane1.NoIndex.L001	AGGGTACAGGGT	GTGCCAGCMGCCGCGGTAA	samples of sand from slow_sand filter water purification system	XXQIITAXX	755	Replicating the microbial community and water quality performance of full-scale slow sand filters in laboratory-scale filters	Sarah Haig	10.1016/j.watres.2014.05.008	ERP020510	16S rRNA	V4	FWD:GTGCCAGCMGCCGCGGTAA; REV:GGACTACHVGGGTWTCTAAT	HiSeq	ANL-Chicago	ANL	2013	150	79858	52043	55601	78815	44986	46100	34135	TRUE	TRUE	TRUE	FALSE	FALSE	718308	biofilm metagenome													2011-06-21T00:00:00Z	GAZ:Scotland	55.905	-3.204	0.5	0
755.SSFA.L3.D1.03.05.11.lane1.NoIndex.L001	CAACGTGCTCCA	GTGCCAGCMGCCGCGGTAA	samples of sand from slow_sand filter water purification system	XXQIITAXX	755	Replicating the microbial community and water quality performance of full-scale slow sand filters in laboratory-scale filters	Sarah Haig	10.1016/j.watres.2014.05.008	ERP020510	16S rRNA	V4	FWD:GTGCCAGCMGCCGCGGTAA; REV:GGACTACHVGGGTWTCTAAT	HiSeq	ANL-Chicago	ANL	2013	150	92879	59046	63650	91398	51206	52355	37115	TRUE	TRUE	FALSE	FALSE	FALSE	718308	biofilm metagenome													2011-05-03T00:00:00Z	GAZ:Scotland	55.905	-3.204	0.01	0
755.SSFA.L3.D1.06.07.11.lane1.NoIndex.L001	CCGAAGATTCTG	GTGCCAGCMGCCGCGGTAA	samples of sand from slow_sand filter water purification system	XXQIITAXX	755	Replicating the microbial community and water quality performance of full-scale slow sand filters in laboratory-scale filters	Sarah Haig	10.1016/j.watres.2014.05.008	ERP020510	16S rRNA	V4	FWD:GTGCCAGCMGCCGCGGTAA; REV:GGACTACHVGGGTWTCTAAT	HiSeq	ANL-Chicago	ANL	2013	150	48498	31350	33802	48023	28791	29385	21207	TRUE	TRUE	FALSE	FALSE	FALSE	718308	biofilm metagenome													2011-07-06T00:00:00Z	GAZ:Scotland	55.905	-3.204	0.01	0
755.SSFA.L3.D1.07.06.11.lane1.NoIndex.L001	ATTGCAAGCAAC	GTGCCAGCMGCCGCGGTAA	samples of sand from slow_sand filter water purification system	XXQIITAXX	755	Replicating the microbial community and water quality performance of full-scale slow sand filters in laboratory-scale filters	Sarah Haig	10.1016/j.watres.2014.05.008	ERP020510	16S rRNA	V4	FWD:GTGCCAGCMGCCGCGGTAA; REV:GGACTACHVGGGTWTCTAAT	HiSeq	ANL-Chicago	ANL	2013	150	92851	63189	67854	92020	53530	55284	41676	TRUE	TRUE	FALSE	FALSE	FALSE	718308	biofilm metagenome													2011-06-07T00:00:00Z	GAZ:Scotland	55.905	-3.204	0.01	0
755.SSFA.L3.D1.10.05.11.lane1.NoIndex.L001	GGTCTCCTACAG	GTGCCAGCMGCCGCGGTAA	samples of sand from slow_sand filter water purification system	XXQIITAXX	755	Replicating the microbial community and water quality performance of full-scale slow sand filters in laboratory-scale filters	Sarah Haig	10.1016/j.watres.2014.05.008	ERP020510	16S rRNA	V4	FWD:GTGCCAGCMGCCGCGGTAA; REV:GGACTACHVGGGTWTCTAAT	HiSeq	ANL-Chicago	ANL	2013	150	116246	72334	78220	114750	64094	65835	48118	TRUE	TRUE	FALSE	FALSE	FALSE	718308	biofilm metagenome													2011-05-11T00:00:00Z	GAZ:Scotland	55.905	-3.204	0.01	0
755.SSFA.L3.D1.12.07.11.lane1.NoIndex.L001	GATGATAACCCA	GTGCCAGCMGCCGCGGTAA	samples of sand from slow_sand filter water purification system	XXQIITAXX	755	Replicating the microbial community and water quality performance of full-scale slow sand filters in laboratory-scale filters	Sarah Haig	10.1016/j.watres.2014.05.008	ERP020510	16S rRNA	V4	FWD:GTGCCAGCMGCCGCGGTAA; REV:GGACTACHVGGGTWTCTAAT	HiSeq	ANL-Chicago	ANL	2013	150	74745	46589	50554	73809	41935	42900	30866	TRUE	TRUE	FALSE	FALSE	FALSE	718308	biofilm metagenome													2011-07-12T00:00:00Z	GAZ:Scotland	55.905	-3.204	0.01	0
755.SSFA.L3.D1.19.04.11.lane1.NoIndex.L001	GTGGTCATCGTA	GTGCCAGCMGCCGCGGTAA	samples of sand from slow_sand filter water purification system	XXQIITAXX	755	Replicating the microbial community and water quality performance of full-scale slow sand filters in laboratory-scale filters	Sarah Haig	10.1016/j.watres.2014.05.008	ERP020510	16S rRNA	V4	FWD:GTGCCAGCMGCCGCGGTAA; REV:GGACTACHVGGGTWTCTAAT	HiSeq	ANL-Chicago	ANL	2013	150	72508	45305	48510	71253	40084	41106	30165	TRUE	TRUE	FALSE	FALSE	FALSE	718308	biofilm metagenome													2011-04-19T00:00:00Z	GAZ:Scotland	55.905	-3.204	0.01	0
755.SSFA.L3.D1.19.07.11.lane1.NoIndex.L001	CCGCACTCAAGT	GTGCCAGCMGCCGCGGTAA	samples of sand from slow_sand filter water purification system	XXQIITAXX	755	Replicating the microbial community and water quality performance of full-scale slow sand filters in laboratory-scale filters	Sarah Haig	10.1016/j.watres.2014.05.008	ERP020510	16S rRNA	V4	FWD:GTGCCAGCMGCCGCGGTAA; REV:GGACTACHVGGGTWTCTAAT	HiSeq	ANL-Chicago	ANL	2013	150	87648	54719	59007	86495	48668	49634	35305	TRUE	TRUE	FALSE	FALSE	FALSE	718308	biofilm metagenome													2011-07-19T00:00:00Z	GAZ:Scotland	55.905	-3.204	0.01	0
755.SSFA.L3.D1.20.09.11.lane1.NoIndex.L001	GACCGTCAATAC	GTGCCAGCMGCCGCGGTAA	samples of sand from slow_sand filter water purification system	XXQIITAXX	755	Replicating the microbial community and water quality performance of full-scale slow sand filters in laboratory-scale filters	Sarah Haig	10.1016/j.watres.2014.05.008	ERP020510	16S rRNA	V4	FWD:GTGCCAGCMGCCGCGGTAA; REV:GGACTACHVGGGTWTCTAAT	HiSeq	ANL-Chicago	ANL	2013	150	83191	50092	54341	81703	45138	45957	33112	TRUE	TRUE	FALSE	FALSE	FALSE	718308	biofilm metagenome													2011-09-20T00:00:00Z	GAZ:Scotland	55.905	-3.204	0.01	0
755.SSFA.L3.D1.24.08.11.lane1.NoIndex.L001	ATATAAGGCCCA	GTGCCAGCMGCCGCGGTAA	samples of sand from slow_sand filter water purification system	XXQIITAXX	755	Replicating the microbial community and water quality performance of full-scale slow sand filters in laboratory-scale filters	Sarah Haig	10.1016/j.watres.2014.05.008	ERP020510	16S rRNA	V4	FWD:GTGCCAGCMGCCGCGGTAA; REV:GGACTACHVGGGTWTCTAAT	HiSeq	ANL-Chicago	ANL	2013	150	83459	51610	55614	82039	45421	46546	34326	TRUE	TRUE	FALSE	FALSE	FALSE	718308	biofilm metagenome													2011-08-24T00:00:00Z	GAZ:Scotland	55.905	-3.204	0.01	0
755.SSFA.L3.D1.28.06.11.lane1.NoIndex.L001	TGGAATTCGGCT	GTGCCAGCMGCCGCGGTAA	samples of sand from slow_sand filter water purification system	XXQIITAXX	755	Replicating the microbial community and water quality performance of full-scale slow sand filters in laboratory-scale filters	Sarah Haig	10.1016/j.watres.2014.05.008	ERP020510	16S rRNA	V4	FWD:GTGCCAGCMGCCGCGGTAA; REV:GGACTACHVGGGTWTCTAAT	HiSeq	ANL-Chicago	ANL	2013	150	78228	47425	51914	77210	44250	45189	32825	TRUE	TRUE	FALSE	FALSE	FALSE	718308	biofilm metagenome													2011-06-28T00:00:00Z	GAZ:Scotland	55.905	-3.204	0.01	0
755.SSFA.L3.D10.03.05.11.lane1.NoIndex.L001	CCAGATATAGCA	GTGCCAGCMGCCGCGGTAA	samples of sand from slow_sand filter water purification system	XXQIITAXX	755	Replicating the microbial community and water quality performance of full-scale slow sand filters in laboratory-scale filters	Sarah Haig	10.1016/j.watres.2014.05.008	ERP020510	16S rRNA	V4	FWD:GTGCCAGCMGCCGCGGTAA; REV:GGACTACHVGGGTWTCTAAT	HiSeq	ANL-Chicago	ANL	2013	150	92392	57806	61938	90880	51503	52251	36635	TRUE	TRUE	FALSE	FALSE	FALSE	718308	biofilm metagenome													2011-05-03T00:00:00Z	GAZ:Scotland	55.905	-3.204	0.1	0
755.SSFA.L3.D10.06.07.11.lane1.NoIndex.L001	AGTCATCGAATG	GTGCCAGCMGCCGCGGTAA	samples of sand from slow_sand filter water purification system	XXQIITAXX	755	Replicating the microbial community and water quality performance of full-scale slow sand filters in laboratory-scale filters	Sarah Haig	10.1016/j.watres.2014.05.008	ERP020510	16S rRNA	V4	FWD:GTGCCAGCMGCCGCGGTAA; REV:GGACTACHVGGGTWTCTAAT	HiSeq	ANL-Chicago	ANL	2013	150	62752	39361	42483	62040	36244	36989	26756	TRUE	TRUE	FALSE	FALSE	FALSE	718308	biofilm metagenome													2011-07-06T00:00:00Z	GAZ:Scotland	55.905	-3.204	0.1	0
755.SSFA.L3.D10.07.06.11.lane1.NoIndex.L001	TAATGGTCGTAG	GTGCCAGCMGCCGCGGTAA	samples of sand from slow_sand filter water purification system	XXQIITAXX	755	Replicating the microbial community and water quality performance of full-scale slow sand filters in laboratory-scale filters	Sarah Haig	10.1016/j.watres.2014.05.008	ERP020510	16S rRNA	V4	FWD:GTGCCAGCMGCCGCGGTAA; REV:GGACTACHVGGGTWTCTAAT	HiSeq	ANL-Chicago	ANL	2013	150	89538	60429	64972	88609	50977	52440	39112	TRUE	TRUE	FALSE	FALSE	FALSE	718308	biofilm metagenome													2011-06-07T00:00:00Z	GAZ:Scotland	55.905	-3.204	0.1	0
755.SSFA.L3.D10.07.06.11.lane1.NoIndex.L001	TAATGGTCGTAG	GTGCCAGCMGCCGCGGTAA	samples of sand from slow_sand filter water purification system	XXQIITAXX	755	Replicating the microbial community and water quality performance of full-scale slow sand filters in laboratory-scale filters	Sarah Haig	10.1016/j.watres.2014.05.008	ERP020510	16S rRNA	V4	FWD:GTGCCAGCMGCCGCGGTAA; REV:GGACTACHVGGGTWTCTAAT	HiSeq	ANL-Chicago	ANL	2013	150	89538	60429	64972	88609	50977	52440	39112	TRUE	TRUE	FALSE	FALSE	FALSE	718308	biofilm metagenome													2011-06-07T00:00:00Z	GAZ:Scotland	55.905	-3.204	0.1	0
755.SSFA.L3.D10.10.05.11.lane1.NoIndex.L001	GTCTTCAGCAAG	GTGCCAGCMGCCGCGGTAA	samples of sand from slow_sand filter water purification system	XXQIITAXX	755	Replicating the microbial community and water quality performance of full-scale slow sand filters in laboratory-scale filters	Sarah Haig	10.1016/j.watres.2014.05.008	ERP020510	16S rRNA	V4	FWD:GTGCCAGCMGCCGCGGTAA; REV:GGACTACHVGGGTWTCTAAT	HiSeq	ANL-Chicago	ANL	2013	150	92032	53937	58353	90580	50959	51972	37041	TRUE	TRUE	FALSE	FALSE	FALSE	718308	biofilm metagenome													2011-05-11T00:00:00Z	GAZ:Scotland	55.905	-3.204	0.1	0
755.SSFA.L3.D10.10.05.11.lane1.NoIndex.L001	GTCTTCAGCAAG	GTGCCAGCMGCCGCGGTAA	samples of sand from slow_sand filter water purification system	XXQIITAXX	755	Replicating the microbial community and water quality performance of full-scale slow sand filters in laboratory-scale filters	Sarah Haig	10.1016/j.watres.2014.05.008	ERP020510	16S rRNA	V4	FWD:GTGCCAGCMGCCGCGGTAA; REV:GGACTACHVGGGTWTCTAAT	HiSeq	ANL-Chicago	ANL	2013	150	92032	53937	58353	90580	50959	51972	37041	TRUE	TRUE	FALSE	FALSE	FALSE	718308	biofilm metagenome													2011-05-11T00:00:00Z	GAZ:Scotland	55.905	-3.204	0.1	0
755.SSFA.L3.D10.12.07.11.lane1.NoIndex.L001	GTACTACCTCGG	GTGCCAGCMGCCGCGGTAA	samples of sand from slow_sand filter water purification system	XXQIITAXX	755	Replicating the microbial community and water quality performance of full-scale slow sand filters in laboratory-scale filters	Sarah Haig	10.1016/j.watres.2014.05.008	ERP020510	16S rRNA	V4	FWD:GTGCCAGCMGCCGCGGTAA; REV:GGACTACHVGGGTWTCTAAT	HiSeq	ANL-Chicago	ANL	2013	150	45721	29296	31621	45373	27394	28076	20500	TRUE	TRUE	FALSE	FALSE	FALSE	718308	biofilm metagenome													2011-07-12T00:00:00Z	GAZ:Scotland	55.905	-3.204	0.1	0
755.SSFA.L3.D10.14.06.11.lane1.NoIndex.L001	ACAAGAACCTTG	GTGCCAGCMGCCGCGGTAA	samples of sand from slow_sand filter water purification system	XXQIITAXX	755	Replicating the microbial community and water quality performance of full-scale slow sand filters in laboratory-scale filters	Sarah Haig	10.1016/j.watres.2014.05.008	ERP020510	16S rRNA	V4	FWD:GTGCCAGCMGCCGCGGTAA; REV:GGACTACHVGGGTWTCTAAT	HiSeq	ANL-Chicago	ANL	2013	150	79823	48922	52833	78679	44512	45223	32250	TRUE	TRUE	FALSE	FALSE	FALSE	718308	biofilm metagenome													2011-06-14T00:00:00Z	GAZ:Scotland	55.905	-3.204	0.1	0
755.SSFA.L3.D10.17.05.11.lane1.NoIndex.L001	GTTTCCGTGGTG	GTGCCAGCMGCCGCGGTAA	samples of sand from slow_sand filter water purification system	XXQIITAXX	755	Replicating the microbial community and water quality performance of full-scale slow sand filters in laboratory-scale filters	Sarah Haig	10.1016/j.watres.2014.05.008	ERP020510	16S rRNA	V4	FWD:GTGCCAGCMGCCGCGGTAA; REV:GGACTACHVGGGTWTCTAAT	HiSeq	ANL-Chicago	ANL	2013	150	56874	40987	43218	56272	33378	33739	24915	TRUE	TRUE	FALSE	FALSE	FALSE	718308	biofilm metagenome													2011-05-17T00:00:00Z	GAZ:Scotland	55.905	-3.204	0.1	0
755.SSFA.L3.D10.18.10.11.lane1.NoIndex.L001	AAGATCGTACTG	GTGCCAGCMGCCGCGGTAA	samples of sand from slow_sand filter water purification system	XXQIITAXX	755	Replicating the microbial community and water quality performance of full-scale slow sand filters in laboratory-scale filters	Sarah Haig	10.1016/j.watres.2014.05.008	ERP020510	16S rRNA	V4	FWD:GTGCCAGCMGCCGCGGTAA; REV:GGACTACHVGGGTWTCTAAT	HiSeq	ANL-Chicago	ANL	2013	150	82107	48448	52656	80764	47540	47728	33166	TRUE	TRUE	FALSE	FALSE	FALSE	718308	biofilm metagenome													2011-10-18T00:00:00Z	GAZ:Scotland	55.905	-3.204	0.1	0
755.SSFA.L3.D10.19.07.11.lane1.NoIndex.L001	ACGCTTAACGAC	GTGCCAGCMGCCGCGGTAA	samples of sand from slow_sand filter water purification system	XXQIITAXX	755	Replicating the microbial community and water quality performance of full-scale slow sand filters in laboratory-scale filters	Sarah Haig	10.1016/j.watres.2014.05.008	ERP020510	16S rRNA	V4	FWD:GTGCCAGCMGCCGCGGTAA; REV:GGACTACHVGGGTWTCTAAT	HiSeq	ANL-Chicago	ANL	2013	150	64381	40324	43495	63644	36598	37266	26485	TRUE	TRUE	FALSE	FALSE	FALSE	718308	biofilm metagenome													2011-07-19T00:00:00Z	GAZ:Scotland	55.905	-3.204	0.1	0
755.SSFA.L3.D10.20.09.11.lane1.NoIndex.L001	CTTAGCTACTCT	GTGCCAGCMGCCGCGGTAA	samples of sand from slow_sand filter water purification system	XXQIITAXX	755	Replicating the microbial community and water quality performance of full-scale slow sand filters in laboratory-scale filters	Sarah Haig	10.1016/j.watres.2014.05.008	ERP020510	16S rRNA	V4	FWD:GTGCCAGCMGCCGCGGTAA; REV:GGACTACHVGGGTWTCTAAT	HiSeq	ANL-Chicago	ANL	2013	150	56652	33905	36762	55799	31424	31740	22276	TRUE	TRUE	FALSE	FALSE	FALSE	718308	biofilm metagenome													2011-09-20T00:00:00Z	GAZ:Scotland	55.905	-3.204	0.1	0
755.SSFA.L3.D10.24.08.11.lane1.NoIndex.L001	TCCGCAACCTGA	GTGCCAGCMGCCGCGGTAA	samples of sand from slow_sand filter water purification system	XXQIITAXX	755	Replicating the microbial community and water quality performance of full-scale slow sand filters in laboratory-scale filters	Sarah Haig	10.1016/j.watres.2014.05.008	ERP020510	16S rRNA	V4	FWD:GTGCCAGCMGCCGCGGTAA; REV:GGACTACHVGGGTWTCTAAT	HiSeq	ANL-Chicago	ANL	2013	150	86988	52275	56554	85449	47035	48099	35178	TRUE	TRUE	FALSE	FALSE	FALSE	718308	biofilm metagenome													2011-08-24T00:00:00Z	GAZ:Scotland	55.905	-3.204	0.1	0
755.SSFA.L3.D10.28.06.11.lane1.NoIndex.L001	AACGAGGCAACG	GTGCCAGCMGCCGCGGTAA	samples of sand from slow_sand filter water purification system	XXQIITAXX	755	Replicating the microbial community and water quality performance of full-scale slow sand filters in laboratory-scale filters	Sarah Haig	10.1016/j.watres.2014.05.008	ERP020510	16S rRNA	V4	FWD:GTGCCAGCMGCCGCGGTAA; REV:GGACTACHVGGGTWTCTAAT	HiSeq	ANL-Chicago	ANL	2013	150	87617	52240	56737	86285	48959	50076	35833	TRUE	TRUE	FALSE	FALSE	FALSE	718308	biofilm metagenome													2011-06-28T00:00:00Z	GAZ:Scotland	55.905	-3.204	0.1	0
755.SSFA.L3.D20.03.05.11.lane1.NoIndex.L001	ATGGGCGAATGG	GTGCCAGCMGCCGCGGTAA	samples of sand from slow_sand filter water purification system	XXQIITAXX	755	Replicating the microbial community and water quality performance of full-scale slow sand filters in laboratory-scale filters	Sarah Haig	10.1016/j.watres.2014.05.008	ERP020510	16S rRNA	V4	FWD:GTGCCAGCMGCCGCGGTAA; REV:GGACTACHVGGGTWTCTAAT	HiSeq	ANL-Chicago	ANL	2013	150	100674	62581	67323	99078	55701	56938	40287	TRUE	TRUE	FALSE	FALSE	FALSE	718308	biofilm metagenome													2011-05-03T00:00:00Z	GAZ:Scotland	55.905	-3.204	0.2	0
755.SSFA.L3.D20.07.06.11.lane1.NoIndex.L001	ATATCGCGATGA	GTGCCAGCMGCCGCGGTAA	samples of sand from slow_sand filter water purification system	XXQIITAXX	755	Replicating the microbial community and water quality performance of full-scale slow sand filters in laboratory-scale filters	Sarah Haig	10.1016/j.watres.2014.05.008	ERP020510	16S rRNA	V4	FWD:GTGCCAGCMGCCGCGGTAA; REV:GGACTACHVGGGTWTCTAAT	HiSeq	ANL-Chicago	ANL	2013	150	85214	57534	61995	84404	48952	50477	37430	TRUE	TRUE	FALSE	FALSE	FALSE	718308	biofilm metagenome													2011-06-07T00:00:00Z	GAZ:Scotland	55.905	-3.204	0.2	0
755.SSFA.L3.D20.10.05.11.lane1.NoIndex.L001	ATTGACCGGTCA	GTGCCAGCMGCCGCGGTAA	samples of sand from slow_sand filter water purification system	XXQIITAXX	755	Replicating the microbial community and water quality performance of full-scale slow sand filters in laboratory-scale filters	Sarah Haig	10.1016/j.watres.2014.05.008	ERP020510	16S rRNA	V4	FWD:GTGCCAGCMGCCGCGGTAA; REV:GGACTACHVGGGTWTCTAAT	HiSeq	ANL-Chicago	ANL	2013	150	117375	71492	77674	115590	65625	66960	47561	TRUE	TRUE	FALSE	FALSE	FALSE	718308	biofilm metagenome													2011-05-11T00:00:00Z	GAZ:Scotland	55.905	-3.204	0.2	0
755.SSFA.L3.D20.14.06.11.lane1.NoIndex.L001	AACTTCACTTCC	GTGCCAGCMGCCGCGGTAA	samples of sand from slow_sand filter water purification system	XXQIITAXX	755	Replicating the microbial community and water quality performance of full-scale slow sand filters in laboratory-scale filters	Sarah Haig	10.1016/j.watres.2014.05.008	ERP020510	16S rRNA	V4	FWD:GTGCCAGCMGCCGCGGTAA; REV:GGACTACHVGGGTWTCTAAT	HiSeq	ANL-Chicago	ANL	2013	150	43190	27233	29355	42750	25690	26001	18946	TRUE	TRUE	FALSE	FALSE	FALSE	718308	biofilm metagenome													2011-06-14T00:00:00Z	GAZ:Scotland	55.905	-3.204	0.2	0
755.SSFA.L3.D20.18.10.11.lane1.NoIndex.L001	GCCCAAGTTCAC	GTGCCAGCMGCCGCGGTAA	samples of sand from slow_sand filter water purification system	XXQIITAXX	755	Replicating the microbial community and water quality performance of full-scale slow sand filters in laboratory-scale filters	Sarah Haig	10.1016/j.watres.2014.05.008	ERP020510	16S rRNA	V4	FWD:GTGCCAGCMGCCGCGGTAA; REV:GGACTACHVGGGTWTCTAAT	HiSeq	ANL-Chicago	ANL	2013	150	88168	53362	57637	86791	50283	51028	35728	TRUE	TRUE	FALSE	FALSE	FALSE	718308	biofilm metagenome													2011-10-18T00:00:00Z	GAZ:Scotland	55.905	-3.204	0.2	0
755.SSFA.L3.D20.19.04.11.lane1.NoIndex.L001	GCAGATTTCCAG	GTGCCAGCMGCCGCGGTAA	samples of sand from slow_sand filter water purification system	XXQIITAXX	755	Replicating the microbial community and water quality performance of full-scale slow sand filters in laboratory-scale filters	Sarah Haig	10.1016/j.watres.2014.05.008	ERP020510	16S rRNA	V4	FWD:GTGCCAGCMGCCGCGGTAA; REV:GGACTACHVGGGTWTCTAAT	HiSeq	ANL-Chicago	ANL	2013	150	65538	42388	45475	64682	36939	37761	26642	TRUE	TRUE	FALSE	FALSE	FALSE	718308	biofilm metagenome													2011-04-19T00:00:00Z	GAZ:Scotland	55.905	-3.204	0.2	0
755.SSFA.L3.D20.19.07.11.lane1.NoIndex.L001	GGACAGTGTATT	GTGCCAGCMGCCGCGGTAA	samples of sand from slow_sand filter water purification system	XXQIITAXX	755	Replicating the microbial community and water quality performance of full-scale slow sand filters in laboratory-scale filters	Sarah Haig	10.1016/j.watres.2014.05.008	ERP020510	16S rRNA	V4	FWD:GTGCCAGCMGCCGCGGTAA; REV:GGACTACHVGGGTWTCTAAT	HiSeq	ANL-Chicago	ANL	2013	150	70869	44352	47821	69968	40105	40701	28580	TRUE	TRUE	FALSE	FALSE	FALSE	718308	biofilm metagenome													2011-07-19T00:00:00Z	GAZ:Scotland	55.905	-3.204	0.2	0
755.SSFA.L3.D20.21.06.11.lane1.NoIndex.L001	ACATACTGAGCA	GTGCCAGCMGCCGCGGTAA	samples of sand from slow_sand filter water purification system	XXQIITAXX	755	Replicating the microbial community and water quality performance of full-scale slow sand filters in laboratory-scale filters	Sarah Haig	10.1016/j.watres.2014.05.008	ERP020510	16S rRNA	V4	FWD:GTGCCAGCMGCCGCGGTAA; REV:GGACTACHVGGGTWTCTAAT	HiSeq	ANL-Chicago	ANL	2013	150	78429	47324	51373	77370	44122	45002	32357	TRUE	TRUE	FALSE	FALSE	FALSE	718308	biofilm metagenome													2011-06-21T00:00:00Z	GAZ:Scotland	55.905	-3.204	0.2	0
755.SSFA.L3.D20.24.08.11.lane1.NoIndex.L001	GCATGCATCCCA	GTGCCAGCMGCCGCGGTAA	samples of sand from slow_sand filter water purification system	XXQIITAXX	755	Replicating the microbial community and water quality performance of full-scale slow sand filters in laboratory-scale filters	Sarah Haig	10.1016/j.watres.2014.05.008	ERP020510	16S rRNA	V4	FWD:GTGCCAGCMGCCGCGGTAA; REV:GGACTACHVGGGTWTCTAAT	HiSeq	ANL-Chicago	ANL	2013	150	79027	47094	51209	77772	42954	43815	31592	TRUE	TRUE	FALSE	FALSE	FALSE	718308	biofilm metagenome													2011-08-24T00:00:00Z	GAZ:Scotland	55.905	-3.204	0.2	0
755.SSFA.L3.D3.07.06.11.lane1.NoIndex.L001	CTTCCCTAACTC	GTGCCAGCMGCCGCGGTAA	samples of sand from slow_sand filter water purification system	XXQIITAXX	755	Replicating the microbial community and water quality performance of full-scale slow sand filters in laboratory-scale filters	Sarah Haig	10.1016/j.watres.2014.05.008	ERP020510	16S rRNA	V4	FWD:GTGCCAGCMGCCGCGGTAA; REV:GGACTACHVGGGTWTCTAAT	HiSeq	ANL-Chicago	ANL	2013	150	107697	73329	79042	106762	62136	64168	48173	TRUE	TRUE	FALSE	FALSE	FALSE	718308	biofilm metagenome													2011-06-07T00:00:00Z	GAZ:Scotland	55.905	-3.204	0.03	0
755.SSFA.L3.D3.10.05.11.lane1.NoIndex.L001	ATAGCGAACTCA	GTGCCAGCMGCCGCGGTAA	samples of sand from slow_sand filter water purification system	XXQIITAXX	755	Replicating the microbial community and water quality performance of full-scale slow sand filters in laboratory-scale filters	Sarah Haig	10.1016/j.watres.2014.05.008	ERP020510	16S rRNA	V4	FWD:GTGCCAGCMGCCGCGGTAA; REV:GGACTACHVGGGTWTCTAAT	HiSeq	ANL-Chicago	ANL	2013	150	121252	73668	79542	119529	66614	68252	49840	TRUE	TRUE	FALSE	FALSE	FALSE	718308	biofilm metagenome													2011-05-11T00:00:00Z	GAZ:Scotland	55.905	-3.204	0.03	0
755.SSFA.L3.D3.12.07.11.lane1.NoIndex.L001	CCGACATTGTAG	GTGCCAGCMGCCGCGGTAA	samples of sand from slow_sand filter water purification system	XXQIITAXX	755	Replicating the microbial community and water quality performance of full-scale slow sand filters in laboratory-scale filters	Sarah Haig	10.1016/j.watres.2014.05.008	ERP020510	16S rRNA	V4	FWD:GTGCCAGCMGCCGCGGTAA; REV:GGACTACHVGGGTWTCTAAT	HiSeq	ANL-Chicago	ANL	2013	150	79168	49087	53264	78016	43986	44900	32162	TRUE	TRUE	FALSE	FALSE	FALSE	718308	biofilm metagenome													2011-07-12T00:00:00Z	GAZ:Scotland	55.905	-3.204	0.03	0
755.SSFA.L3.D3.14.06.11.lane1.NoIndex.L001	TGAGTGGTCTGT	GTGCCAGCMGCCGCGGTAA	samples of sand from slow_sand filter water purification system	XXQIITAXX	755	Replicating the microbial community and water quality performance of full-scale slow sand filters in laboratory-scale filters	Sarah Haig	10.1016/j.watres.2014.05.008	ERP020510	16S rRNA	V4	FWD:GTGCCAGCMGCCGCGGTAA; REV:GGACTACHVGGGTWTCTAAT	HiSeq	ANL-Chicago	ANL	2013	150	45216	28856	31138	44682	26575	27039	19009	TRUE	TRUE	FALSE	FALSE	FALSE	718308	biofilm metagenome													2011-06-14T00:00:00Z	GAZ:Scotland	55.905	-3.204	0.03	0
755.SSFA.L3.D3.19.04.11.lane1.NoIndex.L001	GCCTGTCTGCAA	GTGCCAGCMGCCGCGGTAA	samples of sand from slow_sand filter water purification system	XXQIITAXX	755	Replicating the microbial community and water quality performance of full-scale slow sand filters in laboratory-scale filters	Sarah Haig	10.1016/j.watres.2014.05.008	ERP020510	16S rRNA	V4	FWD:GTGCCAGCMGCCGCGGTAA; REV:GGACTACHVGGGTWTCTAAT	HiSeq	ANL-Chicago	ANL	2013	150	40433	25931	27883	39775	22124	22489	16119	TRUE	TRUE	FALSE	FALSE	FALSE	718308	biofilm metagenome													2011-04-19T00:00:00Z	GAZ:Scotland	55.905	-3.204	0.03	0
755.SSFA.L3.D3.19.07.11.lane1.NoIndex.L001	TAACGGCGCTCT	GTGCCAGCMGCCGCGGTAA	samples of sand from slow_sand filter water purification system	XXQIITAXX	755	Replicating the microbial community and water quality performance of full-scale slow sand filters in laboratory-scale filters	Sarah Haig	10.1016/j.watres.2014.05.008	ERP020510	16S rRNA	V4	FWD:GTGCCAGCMGCCGCGGTAA; REV:GGACTACHVGGGTWTCTAAT	HiSeq	ANL-Chicago	ANL	2013	150	80784	49485	53605	79689	45040	45948	33058	TRUE	TRUE	FALSE	FALSE	FALSE	718308	biofilm metagenome													2011-07-19T00:00:00Z	GAZ:Scotland	55.905	-3.204	0.03	0
755.SSFA.L3.D3.21.06.11.lane1.NoIndex.L001	CACCGAAATCTG	GTGCCAGCMGCCGCGGTAA	samples of sand from slow_sand filter water purification system	XXQIITAXX	755	Replicating the microbial community and water quality performance of full-scale slow sand filters in laboratory-scale filters	Sarah Haig	10.1016/j.watres.2014.05.008	ERP020510	16S rRNA	V4	FWD:GTGCCAGCMGCCGCGGTAA; REV:GGACTACHVGGGTWTCTAAT	HiSeq	ANL-Chicago	ANL	2013	150	74966	45339	49054	73918	43261	44278	32365	TRUE	TRUE	FALSE	FALSE	FALSE	718308	biofilm metagenome													2011-06-21T00:00:00Z	GAZ:Scotland	55.905	-3.204	0.03	0
755.SSFA.L3.D3.28.06.11.lane1.NoIndex.L001	GGTAAGTTTGAC	GTGCCAGCMGCCGCGGTAA	samples of sand from slow_sand filter water purification system	XXQIITAXX	755	Replicating the microbial community and water quality performance of full-scale slow sand filters in laboratory-scale filters	Sarah Haig	10.1016/j.watres.2014.05.008	ERP020510	16S rRNA	V4	FWD:GTGCCAGCMGCCGCGGTAA; REV:GGACTACHVGGGTWTCTAAT	HiSeq	ANL-Chicago	ANL	2013	150	96644	57932	63426	95288	54118	55406	39975	TRUE	TRUE	TRUE	FALSE	FALSE	718308	biofilm metagenome													2011-06-28T00:00:00Z	GAZ:Scotland	55.905	-3.204	0.03	0
755.SSFA.L3.D30.03.05.11.lane1.NoIndex.L001	ACCTTACACCTT	GTGCCAGCMGCCGCGGTAA	samples of sand from slow_sand filter water purification system	XXQIITAXX	755	Replicating the microbial community and water quality performance of full-scale slow sand filters in laboratory-scale filters	Sarah Haig	10.1016/j.watres.2014.05.008	ERP020510	16S rRNA	V4	FWD:GTGCCAGCMGCCGCGGTAA; REV:GGACTACHVGGGTWTCTAAT	HiSeq	ANL-Chicago	ANL	2013	150	75475	46869	50456	74511	42915	43613	31383	TRUE	TRUE	FALSE	FALSE	FALSE	718308	biofilm metagenome													2011-05-03T00:00:00Z	GAZ:Scotland	55.905	-3.204	0.3	0
755.SSFA.L3.D30.07.06.11.lane1.NoIndex.L001	CAAGGCACAAGG	GTGCCAGCMGCCGCGGTAA	samples of sand from slow_sand filter water purification system	XXQIITAXX	755	Replicating the microbial community and water quality performance of full-scale slow sand filters in laboratory-scale filters	Sarah Haig	10.1016/j.watres.2014.05.008	ERP020510	16S rRNA	V4	FWD:GTGCCAGCMGCCGCGGTAA; REV:GGACTACHVGGGTWTCTAAT	HiSeq	ANL-Chicago	ANL	2013	150	80519	54532	58481	79810	46357	47764	35411	TRUE	TRUE	FALSE	FALSE	FALSE	718308	biofilm metagenome													2011-06-07T00:00:00Z	GAZ:Scotland	55.905	-3.204	0.3	0
755.SSFA.L3.D30.10.05.11.lane1.NoIndex.L001	GGAATCCGATTA	GTGCCAGCMGCCGCGGTAA	samples of sand from slow_sand filter water purification system	XXQIITAXX	755	Replicating the microbial community and water quality performance of full-scale slow sand filters in laboratory-scale filters	Sarah Haig	10.1016/j.watres.2014.05.008	ERP020510	16S rRNA	V4	FWD:GTGCCAGCMGCCGCGGTAA; REV:GGACTACHVGGGTWTCTAAT	HiSeq	ANL-Chicago	ANL	2013	150	122526	74974	81420	120693	67935	69237	49507	TRUE	TRUE	FALSE	FALSE	FALSE	718308	biofilm metagenome													2011-05-11T00:00:00Z	GAZ:Scotland	55.905	-3.204	0.3	0
755.SSFA.L3.D30.14.06.11.lane1.NoIndex.L001	TTACCGACGAGT	GTGCCAGCMGCCGCGGTAA	samples of sand from slow_sand filter water purification system	XXQIITAXX	755	Replicating the microbial community and water quality performance of full-scale slow sand filters in laboratory-scale filters	Sarah Haig	10.1016/j.watres.2014.05.008	ERP020510	16S rRNA	V4	FWD:GTGCCAGCMGCCGCGGTAA; REV:GGACTACHVGGGTWTCTAAT	HiSeq	ANL-Chicago	ANL	2013	150	70471	44282	47872	69604	40054	40932	30441	TRUE	TRUE	FALSE	FALSE	FALSE	718308	biofilm metagenome													2011-06-14T00:00:00Z	GAZ:Scotland	55.905	-3.204	0.3	0
755.SSFA.L3.D30.17.05.11.lane1.NoIndex.L001	TTGGGCCACATA	GTGCCAGCMGCCGCGGTAA	samples of sand from slow_sand filter water purification system	XXQIITAXX	755	Replicating the microbial community and water quality performance of full-scale slow sand filters in laboratory-scale filters	Sarah Haig	10.1016/j.watres.2014.05.008	ERP020510	16S rRNA	V4	FWD:GTGCCAGCMGCCGCGGTAA; REV:GGACTACHVGGGTWTCTAAT	HiSeq	ANL-Chicago	ANL	2013	150	65314	48134	50501	64719	39557	39896	29191	TRUE	TRUE	TRUE	FALSE	FALSE	718308	biofilm metagenome													2011-05-17T00:00:00Z	GAZ:Scotland	55.905	-3.204	0.3	0
755.SSFA.L3.D30.18.10.11.lane1.NoIndex.L001	CAGGATTCGTAC	GTGCCAGCMGCCGCGGTAA	samples of sand from slow_sand filter water purification system	XXQIITAXX	755	Replicating the microbial community and water quality performance of full-scale slow sand filters in laboratory-scale filters	Sarah Haig	10.1016/j.watres.2014.05.008	ERP020510	16S rRNA	V4	FWD:GTGCCAGCMGCCGCGGTAA; REV:GGACTACHVGGGTWTCTAAT	HiSeq	ANL-Chicago	ANL	2013	150	74495	44760	48724	73410	42579	43118	30457	TRUE	TRUE	FALSE	FALSE	FALSE	718308	biofilm metagenome													2011-10-18T00:00:00Z	GAZ:Scotland	55.905	-3.204	0.3	0
755.SSFA.L3.D30.19.04.11.lane1.NoIndex.L001	CGATAGGCCTTA	GTGCCAGCMGCCGCGGTAA	samples of sand from slow_sand filter water purification system	XXQIITAXX	755	Replicating the microbial community and water quality performance of full-scale slow sand filters in laboratory-scale filters	Sarah Haig	10.1016/j.watres.2014.05.008	ERP020510	16S rRNA	V4	FWD:GTGCCAGCMGCCGCGGTAA; REV:GGACTACHVGGGTWTCTAAT	HiSeq	ANL-Chicago	ANL	2013	150	52506	34625	37192	51993	30626	31207	22039	TRUE	TRUE	FALSE	FALSE	FALSE	718308	biofilm metagenome													2011-04-19T00:00:00Z	GAZ:Scotland	55.905	-3.204	0.3	0
755.SSFA.L3.D30.19.07.11.lane1.NoIndex.L001	TGAAAGCGGCGA	GTGCCAGCMGCCGCGGTAA	samples of sand from slow_sand filter water purification system	XXQIITAXX	755	Replicating the microbial community and water quality performance of full-scale slow sand filters in laboratory-scale filters	Sarah Haig	10.1016/j.watres.2014.05.008	ERP020510	16S rRNA	V4	FWD:GTGCCAGCMGCCGCGGTAA; REV:GGACTACHVGGGTWTCTAAT	HiSeq	ANL-Chicago	ANL	2013	150	86494	52941	57176	85199	47780	48594	33931	TRUE	TRUE	FALSE	FALSE	FALSE	718308	biofilm metagenome													2011-07-19T00:00:00Z	GAZ:Scotland	55.905	-3.204	0.3	0
755.SSFA.L3.D30.20.09.11.lane1.NoIndex.L001	ACTCGGCCAACT	GTGCCAGCMGCCGCGGTAA	samples of sand from slow_sand filter water purification system	XXQIITAXX	755	Replicating the microbial community and water quality performance of full-scale slow sand filters in laboratory-scale filters	Sarah Haig	10.1016/j.watres.2014.05.008	ERP020510	16S rRNA	V4	FWD:GTGCCAGCMGCCGCGGTAA; REV:GGACTACHVGGGTWTCTAAT	HiSeq	ANL-Chicago	ANL	2013	150	87839	51600	55780	86378	49201	49818	35192	TRUE	TRUE	FALSE	FALSE	FALSE	718308	biofilm metagenome													2011-09-20T00:00:00Z	GAZ:Scotland	55.905	-3.204	0.3	0
755.SSFA.L3.D30.24.08.11.lane1.NoIndex.L001	ATCCCAGCATGC	GTGCCAGCMGCCGCGGTAA	samples of sand from slow_sand filter water purification system	XXQIITAXX	755	Replicating the microbial community and water quality performance of full-scale slow sand filters in laboratory-scale filters	Sarah Haig	10.1016/j.watres.2014.05.008	ERP020510	16S rRNA	V4	FWD:GTGCCAGCMGCCGCGGTAA; REV:GGACTACHVGGGTWTCTAAT	HiSeq	ANL-Chicago	ANL	2013	150	83583	49369	53764	82172	46685	47422	33988	TRUE	TRUE	FALSE	FALSE	FALSE	718308	biofilm metagenome													2011-08-24T00:00:00Z	GAZ:Scotland	55.905	-3.204	0.3	0
755.SSFA.L3.D30.26.07.11.lane1.NoIndex.L001	AAGGGACAAGTG	GTGCCAGCMGCCGCGGTAA	samples of sand from slow_sand filter water purification system	XXQIITAXX	755	Replicating the microbial community and water quality performance of full-scale slow sand filters in laboratory-scale filters	Sarah Haig	10.1016/j.watres.2014.05.008	ERP020510	16S rRNA	V4	FWD:GTGCCAGCMGCCGCGGTAA; REV:GGACTACHVGGGTWTCTAAT	HiSeq	ANL-Chicago	ANL	2013	150	74313	56563	58713	73473	41272	41710	32644	TRUE	TRUE	FALSE	FALSE	FALSE	718308	biofilm metagenome													2011-07-06T00:00:00Z	GAZ:Scotland	55.905	-3.204	0.3	0
755.SSFA.L3.D30.28.06.11.lane1.NoIndex.L001	CTCGATGTAAGC	GTGCCAGCMGCCGCGGTAA	samples of sand from slow_sand filter water purification system	XXQIITAXX	755	Replicating the microbial community and water quality performance of full-scale slow sand filters in laboratory-scale filters	Sarah Haig	10.1016/j.watres.2014.05.008	ERP020510	16S rRNA	V4	FWD:GTGCCAGCMGCCGCGGTAA; REV:GGACTACHVGGGTWTCTAAT	HiSeq	ANL-Chicago	ANL	2013	150	78843	48219	52148	77785	44507	45398	32764	TRUE	TRUE	FALSE	FALSE	FALSE	718308	biofilm metagenome													2011-06-28T00:00:00Z	GAZ:Scotland	55.905	-3.204	0.3	0
755.SSFA.L3.D40.03.05.11.lane1.NoIndex.L001	CGAGCTGTTACC	GTGCCAGCMGCCGCGGTAA	samples of sand from slow_sand filter water purification system	XXQIITAXX	755	Replicating the microbial community and water quality performance of full-scale slow sand filters in laboratory-scale filters	Sarah Haig	10.1016/j.watres.2014.05.008	ERP020510	16S rRNA	V4	FWD:GTGCCAGCMGCCGCGGTAA; REV:GGACTACHVGGGTWTCTAAT	HiSeq	ANL-Chicago	ANL	2013	150	97837	59236	63974	96190	53766	55176	39543	TRUE	TRUE	FALSE	FALSE	FALSE	718308	biofilm metagenome													2011-05-03T00:00:00Z	GAZ:Scotland	55.905	-3.204	0.4	0
755.SSFA.L3.D40.12.07.11.lane1.NoIndex.L001	ACAGGAGGGTGT	GTGCCAGCMGCCGCGGTAA	samples of sand from slow_sand filter water purification system	XXQIITAXX	755	Replicating the microbial community and water quality performance of full-scale slow sand filters in laboratory-scale filters	Sarah Haig	10.1016/j.watres.2014.05.008	ERP020510	16S rRNA	V4	FWD:GTGCCAGCMGCCGCGGTAA; REV:GGACTACHVGGGTWTCTAAT	HiSeq	ANL-Chicago	ANL	2013	150	80475	50285	54417	79522	47011	48011	34333	TRUE	TRUE	FALSE	FALSE	FALSE	718308	biofilm metagenome													2011-07-12T00:00:00Z	GAZ:Scotland	55.905	-3.204	0.4	0
755.SSFA.L3.D40.14.06.11.lane1.NoIndex.L001	TGAGGACTACCT	GTGCCAGCMGCCGCGGTAA	samples of sand from slow_sand filter water purification system	XXQIITAXX	755	Replicating the microbial community and water quality performance of full-scale slow sand filters in laboratory-scale filters	Sarah Haig	10.1016/j.watres.2014.05.008	ERP020510	16S rRNA	V4	FWD:GTGCCAGCMGCCGCGGTAA; REV:GGACTACHVGGGTWTCTAAT	HiSeq	ANL-Chicago	ANL	2013	150	59642	36381	39246	58782	33549	34163	24842	TRUE	TRUE	FALSE	FALSE	FALSE	718308	biofilm metagenome													2011-06-14T00:00:00Z	GAZ:Scotland	55.905	-3.204	0.4	0
755.SSFA.L3.D40.17.05.11.lane1.NoIndex.L001	CCTACATGAGAC	GTGCCAGCMGCCGCGGTAA	samples of sand from slow_sand filter water purification system	XXQIITAXX	755	Replicating the microbial community and water quality performance of full-scale slow sand filters in laboratory-scale filters	Sarah Haig	10.1016/j.watres.2014.05.008	ERP020510	16S rRNA	V4	FWD:GTGCCAGCMGCCGCGGTAA; REV:GGACTACHVGGGTWTCTAAT	HiSeq	ANL-Chicago	ANL	2013	150	77187	53329	56583	76220	43929	44792	33101	TRUE	TRUE	FALSE	FALSE	FALSE	718308	biofilm metagenome													2011-05-17T00:00:00Z	GAZ:Scotland	55.905	-3.204	0.4	0
755.SSFA.L3.D40.18.10.11.lane1.NoIndex.L001	AGTGCCCTTGGT	GTGCCAGCMGCCGCGGTAA	samples of sand from slow_sand filter water purification system	XXQIITAXX	755	Replicating the microbial community and water quality performance of full-scale slow sand filters in laboratory-scale filters	Sarah Haig	10.1016/j.watres.2014.05.008	ERP020510	16S rRNA	V4	FWD:GTGCCAGCMGCCGCGGTAA; REV:GGACTACHVGGGTWTCTAAT	HiSeq	ANL-Chicago	ANL	2013	150	65434	38740	42074	64514	37782	38253	26550	TRUE	TRUE	FALSE	FALSE	FALSE	718308	biofilm metagenome													2011-10-18T00:00:00Z	GAZ:Scotland	55.905	-3.204	0.4	0
755.SSFA.L3.D40.19.07.11.lane1.NoIndex.L001	TGGCGTCATTCG	GTGCCAGCMGCCGCGGTAA	samples of sand from slow_sand filter water purification system	XXQIITAXX	755	Replicating the microbial community and water quality performance of full-scale slow sand filters in laboratory-scale filters	Sarah Haig	10.1016/j.watres.2014.05.008	ERP020510	16S rRNA	V4	FWD:GTGCCAGCMGCCGCGGTAA; REV:GGACTACHVGGGTWTCTAAT	HiSeq	ANL-Chicago	ANL	2013	150	70940	46525	49932	70055	39176	39955	28050	TRUE	TRUE	FALSE	FALSE	FALSE	718308	biofilm metagenome													2011-07-19T00:00:00Z	GAZ:Scotland	55.905	-3.204	0.4	0
755.SSFA.L3.D40.21.06.11.lane1.NoIndex.L001	CGATATCAGTAG	GTGCCAGCMGCCGCGGTAA	samples of sand from slow_sand filter water purification system	XXQIITAXX	755	Replicating the microbial community and water quality performance of full-scale slow sand filters in laboratory-scale filters	Sarah Haig	10.1016/j.watres.2014.05.008	ERP020510	16S rRNA	V4	FWD:GTGCCAGCMGCCGCGGTAA; REV:GGACTACHVGGGTWTCTAAT	HiSeq	ANL-Chicago	ANL	2013	150	51869	32936	35400	51223	29924	30437	21625	TRUE	TRUE	FALSE	FALSE	FALSE	718308	biofilm metagenome													2011-06-21T00:00:00Z	GAZ:Scotland	55.905	-3.204	0.4	0
755.SSFA.L3.D40.24.08.11.lane1.NoIndex.L001	ACCAACAGATTG	GTGCCAGCMGCCGCGGTAA	samples of sand from slow_sand filter water purification system	XXQIITAXX	755	Replicating the microbial community and water quality performance of full-scale slow sand filters in laboratory-scale filters	Sarah Haig	10.1016/j.watres.2014.05.008	ERP020510	16S rRNA	V4	FWD:GTGCCAGCMGCCGCGGTAA; REV:GGACTACHVGGGTWTCTAAT	HiSeq	ANL-Chicago	ANL	2013	150	86198	51791	56291	84859	47108	48030	35063	TRUE	TRUE	FALSE	FALSE	FALSE	718308	biofilm metagenome													2011-08-24T00:00:00Z	GAZ:Scotland	55.905	-3.204	0.4	0
755.SSFA.L3.D40.28.06.11.lane1.NoIndex.L001	CATGCGGATCCT	GTGCCAGCMGCCGCGGTAA	samples of sand from slow_sand filter water purification system	XXQIITAXX	755	Replicating the microbial community and water quality performance of full-scale slow sand filters in laboratory-scale filters	Sarah Haig	10.1016/j.watres.2014.05.008	ERP020510	16S rRNA	V4	FWD:GTGCCAGCMGCCGCGGTAA; REV:GGACTACHVGGGTWTCTAAT	HiSeq	ANL-Chicago	ANL	2013	150	73588	45899	49598	72589	41392	42224	30079	TRUE	TRUE	FALSE	FALSE	FALSE	718308	biofilm metagenome													2011-06-28T00:00:00Z	GAZ:Scotland	55.905	-3.204	0.4	0
755.SSFA.L3.D5.03.05.11.lane1.NoIndex.L001	TATCACCGGCAC	GTGCCAGCMGCCGCGGTAA	samples of sand from slow_sand filter water purification system	XXQIITAXX	755	Replicating the microbial community and water quality performance of full-scale slow sand filters in laboratory-scale filters	Sarah Haig	10.1016/j.watres.2014.05.008	ERP020510	16S rRNA	V4	FWD:GTGCCAGCMGCCGCGGTAA; REV:GGACTACHVGGGTWTCTAAT	HiSeq	ANL-Chicago	ANL	2013	150	90795	57343	61733	89503	50258	51233	36506	TRUE	TRUE	FALSE	FALSE	FALSE	718308	biofilm metagenome													2011-05-03T00:00:00Z	GAZ:Scotland	55.905	-3.204	0.05	0
755.SSFA.L3.D5.07.06.11.lane1.NoIndex.L001	GTCATAAGAACC	GTGCCAGCMGCCGCGGTAA	samples of sand from slow_sand filter water purification system	XXQIITAXX	755	Replicating the microbial community and water quality performance of full-scale slow sand filters in laboratory-scale filters	Sarah Haig	10.1016/j.watres.2014.05.008	ERP020510	16S rRNA	V4	FWD:GTGCCAGCMGCCGCGGTAA; REV:GGACTACHVGGGTWTCTAAT	HiSeq	ANL-Chicago	ANL	2013	150	95722	65048	69981	94856	55062	56868	42545	TRUE	TRUE	FALSE	FALSE	FALSE	718308	biofilm metagenome													2011-06-07T00:00:00Z	GAZ:Scotland	55.905	-3.204	0.05	0
755.SSFA.L3.D5.10.05.11.lane1.NoIndex.L001	CTTGAGAAATCG	GTGCCAGCMGCCGCGGTAA	samples of sand from slow_sand filter water purification system	XXQIITAXX	755	Replicating the microbial community and water quality performance of full-scale slow sand filters in laboratory-scale filters	Sarah Haig	10.1016/j.watres.2014.05.008	ERP020510	16S rRNA	V4	FWD:GTGCCAGCMGCCGCGGTAA; REV:GGACTACHVGGGTWTCTAAT	HiSeq	ANL-Chicago	ANL	2013	150	86054	50664	54839	84848	49095	50095	35802	TRUE	TRUE	FALSE	FALSE	FALSE	718308	biofilm metagenome													2011-05-11T00:00:00Z	GAZ:Scotland	55.905	-3.204	0.05	0
755.SSFA.L3.D5.12.07.11.lane1.NoIndex.L001	TGGCGATACGTT	GTGCCAGCMGCCGCGGTAA	samples of sand from slow_sand filter water purification system	XXQIITAXX	755	Replicating the microbial community and water quality performance of full-scale slow sand filters in laboratory-scale filters	Sarah Haig	10.1016/j.watres.2014.05.008	ERP020510	16S rRNA	V4	FWD:GTGCCAGCMGCCGCGGTAA; REV:GGACTACHVGGGTWTCTAAT	HiSeq	ANL-Chicago	ANL	2013	150	76449	46942	50743	75346	41645	42460	30188	TRUE	TRUE	FALSE	FALSE	FALSE	718308	biofilm metagenome													2011-07-12T00:00:00Z	GAZ:Scotland	55.905	-3.204	0.05	0
755.SSFA.L3.D5.17.05.11.lane1.NoIndex.L001	ACGGCGTTATGT	GTGCCAGCMGCCGCGGTAA	samples of sand from slow_sand filter water purification system	XXQIITAXX	755	Replicating the microbial community and water quality performance of full-scale slow sand filters in laboratory-scale filters	Sarah Haig	10.1016/j.watres.2014.05.008	ERP020510	16S rRNA	V4	FWD:GTGCCAGCMGCCGCGGTAA; REV:GGACTACHVGGGTWTCTAAT	HiSeq	ANL-Chicago	ANL	2013	150	67982	47750	50883	67199	39775	40549	30102	TRUE	TRUE	FALSE	FALSE	FALSE	718308	biofilm metagenome													2011-05-17T00:00:00Z	GAZ:Scotland	55.905	-3.204	0.05	0
755.SSFA.L3.D5.19.04.11.lane1.NoIndex.L001	GGATAGCCAAGG	GTGCCAGCMGCCGCGGTAA	samples of sand from slow_sand filter water purification system	XXQIITAXX	755	Replicating the microbial community and water quality performance of full-scale slow sand filters in laboratory-scale filters	Sarah Haig	10.1016/j.watres.2014.05.008	ERP020510	16S rRNA	V4	FWD:GTGCCAGCMGCCGCGGTAA; REV:GGACTACHVGGGTWTCTAAT	HiSeq	ANL-Chicago	ANL	2013	150	90122	55467	60298	88705	50311	51878	37446	TRUE	TRUE	FALSE	FALSE	FALSE	718308	biofilm metagenome													2011-04-19T00:00:00Z	GAZ:Scotland	55.905	-3.204	0.05	0
755.SSFA.L3.D5.19.07.11.lane1.NoIndex.L001	CCGAATTGACAA	GTGCCAGCMGCCGCGGTAA	samples of sand from slow_sand filter water purification system	XXQIITAXX	755	Replicating the microbial community and water quality performance of full-scale slow sand filters in laboratory-scale filters	Sarah Haig	10.1016/j.watres.2014.05.008	ERP020510	16S rRNA	V4	FWD:GTGCCAGCMGCCGCGGTAA; REV:GGACTACHVGGGTWTCTAAT	HiSeq	ANL-Chicago	ANL	2013	150	92246	56387	60848	90877	50930	52192	37163	TRUE	TRUE	FALSE	FALSE	FALSE	718308	biofilm metagenome													2011-07-19T00:00:00Z	GAZ:Scotland	55.905	-3.204	0.05	0
755.SSFA.L3.D5.20.09.11.lane1.NoIndex.L001	AAGTGAAGCGAG	GTGCCAGCMGCCGCGGTAA	samples of sand from slow_sand filter water purification system	XXQIITAXX	755	Replicating the microbial community and water quality performance of full-scale slow sand filters in laboratory-scale filters	Sarah Haig	10.1016/j.watres.2014.05.008	ERP020510	16S rRNA	V4	FWD:GTGCCAGCMGCCGCGGTAA; REV:GGACTACHVGGGTWTCTAAT	HiSeq	ANL-Chicago	ANL	2013	150	59554	35282	38261	58709	34188	34602	24208	TRUE	TRUE	FALSE	FALSE	FALSE	718308	biofilm metagenome													2011-09-20T00:00:00Z	GAZ:Scotland	55.905	-3.204	0.05	0
755.SSFA.L3.D5.28.06.11.lane1.NoIndex.L001	GTGTGTGCCATA	GTGCCAGCMGCCGCGGTAA	samples of sand from slow_sand filter water purification system	XXQIITAXX	755	Replicating the microbial community and water quality performance of full-scale slow sand filters in laboratory-scale filters	Sarah Haig	10.1016/j.watres.2014.05.008	ERP020510	16S rRNA	V4	FWD:GTGCCAGCMGCCGCGGTAA; REV:GGACTACHVGGGTWTCTAAT	HiSeq	ANL-Chicago	ANL	2013	150	84575	51068	55839	83538	48044	49082	35596	TRUE	TRUE	FALSE	FALSE	FALSE	718308	biofilm metagenome													2011-06-28T00:00:00Z	GAZ:Scotland	55.905	-3.204	0.05	0
755.SSFA.L3.D50.06.07.11.lane1.NoIndex.L001	TTGCGACAAAGT	GTGCCAGCMGCCGCGGTAA	samples of sand from slow_sand filter water purification system	XXQIITAXX	755	Replicating the microbial community and water quality performance of full-scale slow sand filters in laboratory-scale filters	Sarah Haig	10.1016/j.watres.2014.05.008	ERP020510	16S rRNA	V4	FWD:GTGCCAGCMGCCGCGGTAA; REV:GGACTACHVGGGTWTCTAAT	HiSeq	ANL-Chicago	ANL	2013	150	77849	49901	54019	77083	45652	46619	33472	TRUE	TRUE	FALSE	FALSE	FALSE	718308	biofilm metagenome													2011-07-06T00:00:00Z	GAZ:Scotland	55.905	-3.204	0.5	0
755.SSFA.L3.D50.07.06.11.lane1.NoIndex.L001	CATCGCGTTGAC	GTGCCAGCMGCCGCGGTAA	samples of sand from slow_sand filter water purification system	XXQIITAXX	755	Replicating the microbial community and water quality performance of full-scale slow sand filters in laboratory-scale filters	Sarah Haig	10.1016/j.watres.2014.05.008	ERP020510	16S rRNA	V4	FWD:GTGCCAGCMGCCGCGGTAA; REV:GGACTACHVGGGTWTCTAAT	HiSeq	ANL-Chicago	ANL	2013	150	88446	59693	63954	87640	51408	52845	39360	TRUE	TRUE	FALSE	FALSE	FALSE	718308	biofilm metagenome													2011-06-07T00:00:00Z	GAZ:Scotland	55.905	-3.204	0.5	0
755.SSFA.L3.D50.12.07.11.lane1.NoIndex.L001	AGCGGCCTATTA	GTGCCAGCMGCCGCGGTAA	samples of sand from slow_sand filter water purification system	XXQIITAXX	755	Replicating the microbial community and water quality performance of full-scale slow sand filters in laboratory-scale filters	Sarah Haig	10.1016/j.watres.2014.05.008	ERP020510	16S rRNA	V4	FWD:GTGCCAGCMGCCGCGGTAA; REV:GGACTACHVGGGTWTCTAAT	HiSeq	ANL-Chicago	ANL	2013	150	71995	44486	48240	71035	41376	42000	29434	TRUE	TRUE	FALSE	FALSE	FALSE	718308	biofilm metagenome													2011-07-12T00:00:00Z	GAZ:Scotland	55.905	-3.204	0.5	0
755.SSFA.L3.D50.14.06.11.lane1.NoIndex.L001	GTAGACATGTGT	GTGCCAGCMGCCGCGGTAA	samples of sand from slow_sand filter water purification system	XXQIITAXX	755	Replicating the microbial community and water quality performance of full-scale slow sand filters in laboratory-scale filters	Sarah Haig	10.1016/j.watres.2014.05.008	ERP020510	16S rRNA	V4	FWD:GTGCCAGCMGCCGCGGTAA; REV:GGACTACHVGGGTWTCTAAT	HiSeq	ANL-Chicago	ANL	2013	150	46414	29589	31820	45827	26516	27024	19733	TRUE	TRUE	FALSE	FALSE	FALSE	718308	biofilm metagenome													2011-06-14T00:00:00Z	GAZ:Scotland	55.905	-3.204	0.5	0
755.SSFA.L3.D50.18.10.11.lane1.NoIndex.L001	CGTCGTCTAAGA	GTGCCAGCMGCCGCGGTAA	samples of sand from slow_sand filter water purification system	XXQIITAXX	755	Replicating the microbial community and water quality performance of full-scale slow sand filters in laboratory-scale filters	Sarah Haig	10.1016/j.watres.2014.05.008	ERP020510	16S rRNA	V4	FWD:GTGCCAGCMGCCGCGGTAA; REV:GGACTACHVGGGTWTCTAAT	HiSeq	ANL-Chicago	ANL	2013	150	67412	45989	49044	65974	35508	36214	27693	TRUE	TRUE	FALSE	FALSE	FALSE	718308	biofilm metagenome													2011-10-18T00:00:00Z	GAZ:Scotland	55.905	-3.204	0.5	0
755.SSFA.L3.D50.19.04.11.lane1.NoIndex.L001	GACTACCCGTTG	GTGCCAGCMGCCGCGGTAA	samples of sand from slow_sand filter water purification system	XXQIITAXX	755	Replicating the microbial community and water quality performance of full-scale slow sand filters in laboratory-scale filters	Sarah Haig	10.1016/j.watres.2014.05.008	ERP020510	16S rRNA	V4	FWD:GTGCCAGCMGCCGCGGTAA; REV:GGACTACHVGGGTWTCTAAT	HiSeq	ANL-Chicago	ANL	2013	150	95162	60943	65230	93532	51853	53080	38304	TRUE	TRUE	FALSE	FALSE	FALSE	718308	biofilm metagenome													2011-04-19T00:00:00Z	GAZ:Scotland	55.905	-3.204	0.5	0
755.SSFA.L3.D50.19.07.11.lane1.NoIndex.L001	GTTCCGGATTAG	GTGCCAGCMGCCGCGGTAA	samples of sand from slow_sand filter water purification system	XXQIITAXX	755	Replicating the microbial community and water quality performance of full-scale slow sand filters in laboratory-scale filters	Sarah Haig	10.1016/j.watres.2014.05.008	ERP020510	16S rRNA	V4	FWD:GTGCCAGCMGCCGCGGTAA; REV:GGACTACHVGGGTWTCTAAT	HiSeq	ANL-Chicago	ANL	2013	150	84498	52758	56800	83227	47132	48178	33827	TRUE	TRUE	FALSE	FALSE	FALSE	718308	biofilm metagenome													2011-07-19T00:00:00Z	GAZ:Scotland	55.905	-3.204	0.5	0
755.SSFA.L3.D50.20.09.11.lane1.NoIndex.L001	GCGTAGAGAGAC	GTGCCAGCMGCCGCGGTAA	samples of sand from slow_sand filter water purification system	XXQIITAXX	755	Replicating the microbial community and water quality performance of full-scale slow sand filters in laboratory-scale filters	Sarah Haig	10.1016/j.watres.2014.05.008	ERP020510	16S rRNA	V4	FWD:GTGCCAGCMGCCGCGGTAA; REV:GGACTACHVGGGTWTCTAAT	HiSeq	ANL-Chicago	ANL	2013	150	79034	47774	51828	77580	43050	43457	30112	TRUE	TRUE	FALSE	FALSE	FALSE	718308	biofilm metagenome													2011-09-20T00:00:00Z	GAZ:Scotland	55.905	-3.204	0.5	0
755.SSFA.L3.D50.24.08.11.lane1.NoIndex.L001	CTGGTGCTGAAT	GTGCCAGCMGCCGCGGTAA	samples of sand from slow_sand filter water purification system	XXQIITAXX	755	Replicating the microbial community and water quality performance of full-scale slow sand filters in laboratory-scale filters	Sarah Haig	10.1016/j.watres.2014.05.008	ERP020510	16S rRNA	V4	FWD:GTGCCAGCMGCCGCGGTAA; REV:GGACTACHVGGGTWTCTAAT	HiSeq	ANL-Chicago	ANL	2013	150	76582	47021	51138	75478	42932	43830	32110	TRUE	TRUE	FALSE	FALSE	FALSE	718308	biofilm metagenome													2011-08-24T00:00:00Z	GAZ:Scotland	55.905	-3.204	0.5	0
755.SSFA.L3.D50.26.07.11.lane1.NoIndex.L001	GATACGTTCGCA	GTGCCAGCMGCCGCGGTAA	samples of sand from slow_sand filter water purification system	XXQIITAXX	755	Replicating the microbial community and water quality performance of full-scale slow sand filters in laboratory-scale filters	Sarah Haig	10.1016/j.watres.2014.05.008	ERP020510	16S rRNA	V4	FWD:GTGCCAGCMGCCGCGGTAA; REV:GGACTACHVGGGTWTCTAAT	HiSeq	ANL-Chicago	ANL	2013	150	76681	59955	61823	76050	44139	44318	35018	TRUE	TRUE	FALSE	FALSE	FALSE	718308	biofilm metagenome													2011-07-26T00:00:00Z	GAZ:Scotland	55.905	-3.204	0.5	0
[truncated: 15,185 more rows]
[truncated: 35 more columns]

## Sheet: Table S4.
Supplementary Table S4. Prevalence of Tepidiformaceae and Tepidiforma in EMP datasets.
Family Tepidiformaceae
empo	Rank	P	level
Free-living	Tepidiformaceae	0.284351	empo1
Host-associated	Tepidiformaceae	0.0636388	empo1
Animal	Tepidiformaceae	0.0245838	empo2
[truncated: 34 more rows]

[truncated: 18 more sheets: Table S5, Table S6., Table S7., Table S8., Table S9., Table S10., Table S11., Table S12., Table S13., Table S14., Table S15., Table S16., Table S17., Table S18., Table S19., Table S20., Table S21., Table S22.]
